# Supplementary material
Source: publisher figshare collection journal article supplement (https://acs.figshare.com/ndownloader/files/3927328)
Supplement: Supplementary file 1 [file 3927328]

_publ_title
;
Enantioselective inclusion of alcohols by solvent-controlled assembled dynamic MOFs
;
  
_publ_author_name
;
 Lang Lin, Rongmin Yu,* Xiao-Yuan Wu, Fei Wang, Wenbin Yang, Xiangguang Guo, Zujin Lin and Can-Zhong Lu*
;

_publ_author_address
;
Fujian Institute of Research on the Structure of Matter,
Chinese Academy of Sciences,
Fuzhou, Fujian, 350002 P. R. China
;

_publ_contact_author_email        czlu@fjirsm.ac.cn,rongminyu@fjirsm.ac.cn
_publ_contact_author_fax          (+86)-591-83714946
_publ_contact_author_phone        (+86)-591-83705794   

#================================================================end
 
data_L-1
 
_audit_creation_method            SHELXL-2013
_chemical_name_systematic
;
 ?
;
_chemical_name_common             ?
_chemical_melting_point           ?
_chemical_formula_moiety          'C30 H40 Cu2 N10 O6'
_chemical_formula_sum
 'C30 H40 Cu2 N10 O6' 
_chemical_formula_weight          763.80

loop_
 _atom_type_symbol
 _atom_type_description
 _atom_type_scat_dispersion_real
 _atom_type_scat_dispersion_imag
 _atom_type_scat_source
 'C'  'C'   0.0181   0.0091
 'International Tables Vol C Tables 4.2.6.8 and 6.1.1.4'
 'H'  'H'   0.0000   0.0000
 'International Tables Vol C Tables 4.2.6.8 and 6.1.1.4'
 'N'  'N'   0.0311   0.0180
 'International Tables Vol C Tables 4.2.6.8 and 6.1.1.4'
 'O'  'O'   0.0492   0.0322
 'International Tables Vol C Tables 4.2.6.8 and 6.1.1.4'
 'Cu'  'Cu'  -1.9646   0.5888
 'International Tables Vol C Tables 4.2.6.8 and 6.1.1.4'
 
_space_group_crystal_system       triclinic
_space_group_IT_number            1
_space_group_name_H-M_alt         'P 1'
_space_group_name_Hall            'P 1'
 
_shelx_space_group_comment
;
The symmetry employed for this shelxl refinement is uniquely defined
by the following loop, which should always be used as a source of
symmetry information in preference to the above space-group names.
They are only intended as comments.
;
 
loop_
 _space_group_symop_operation_xyz
 'x, y, z'
 
_cell_length_a                    9.0711(5)
_cell_length_b                    9.6401(4)
_cell_length_c                    11.0829(7)
_cell_angle_alpha                 90.337(4)
_cell_angle_beta                  113.571(6)
_cell_angle_gamma                 98.063(4)
_cell_volume                      877.46(9)
_cell_formula_units_Z             1
_cell_measurement_temperature     293(2)
_cell_measurement_reflns_used     3868 
_cell_measurement_theta_min       4.3590
_cell_measurement_theta_max       76.8193 
 
_exptl_crystal_description        sheet 
_exptl_crystal_colour             green 
_exptl_crystal_density_meas       ? 
_exptl_crystal_density_method     'not measured'              
_exptl_crystal_density_diffrn     1.445          
_exptl_crystal_F_000              396
_exptl_transmission_factor_min    ?                                             
_exptl_transmission_factor_max    ?                                             
_exptl_crystal_size_max           0.200
_exptl_crystal_size_mid           0.100
_exptl_crystal_size_min           0.100
_exptl_absorpt_coefficient_mu     1.962
_shelx_estimated_absorpt_T_min    0.695
_shelx_estimated_absorpt_T_max    0.828
_exptl_absorpt_correction_type    multi-scan 
_exptl_absorpt_correction_T_min   0.790 
_exptl_absorpt_correction_T_max   0.822 
_exptl_absorpt_process_details    ? 
 
_exptl_special_details
;
 ?
;
 
_diffrn_ambient_temperature       293(2)
_diffrn_radiation_wavelength      1.54184
_diffrn_radiation_type            CuK\a
_diffrn_source                    'SuperNova (Cu) X-ray Source'                      
_diffrn_measurement_device_type   'SuperNova, Dual, Cu at zero, Atlas'
_diffrn_measurement_method        '\w scans' 
_diffrn_detector_area_resol_mean  10.3503 
_diffrn_reflns_number             7315
_diffrn_reflns_av_unetI/netI      0.0292
_diffrn_reflns_av_R_equivalents   0.0265
_diffrn_reflns_limit_h_min        -11
_diffrn_reflns_limit_h_max        9
_diffrn_reflns_limit_k_min        -8
_diffrn_reflns_limit_k_max        12
_diffrn_reflns_limit_l_min        -13
_diffrn_reflns_limit_l_max        13
_diffrn_reflns_theta_min          4.363
_diffrn_reflns_theta_max          77.025
_diffrn_reflns_theta_full         67.684
_diffrn_measured_fraction_theta_max   0.977
_diffrn_measured_fraction_theta_full  0.999
_diffrn_reflns_Laue_measured_fraction_max    0.977
_diffrn_reflns_Laue_measured_fraction_full   0.999
_diffrn_reflns_point_group_measured_fraction_max   0.565
_diffrn_reflns_point_group_measured_fraction_full  0.585
_reflns_number_total              4205
_reflns_number_gt                 3914
_reflns_threshold_expression      'I > 2\s(I)'
_reflns_Friedel_coverage          0.158
_reflns_Friedel_fraction_max      0.154
_reflns_Friedel_fraction_full     0.172
 
_reflns_special_details
;
 Reflections were merged by SHELXL according to the crystal
 class for the calculation of statistics and refinement.
 
 _reflns_Friedel_fraction is defined as the number of unique
 Friedel pairs measured divided by the number that would be
 possible theoretically, ignoring centric projections and
 systematic absences.
;
 
_computing_data_collection
;
CrysAlisPro, Agilent Technologies,
Version 1.171.36.20 (release 27-06-2012 CrysAlis171 .NET)
;
_computing_cell_refinement
;
CrysAlisPro, Agilent Technologies,
Version 1.171.36.20 (release 27-06-2012 CrysAlis171 .NET)
;
_computing_data_reduction
;
CrysAlisPro, Agilent Technologies,
Version 1.171.36.20 (release 27-06-2012 CrysAlis171 .NET)
;
_computing_structure_solution     'SHELXL-2013 (Sheldrick, 2013)'
_computing_structure_refinement   'SHELXL-2013 (Sheldrick, 2013)'
_computing_molecular_graphics     ��DIAMOND��
_computing_publication_material   'SHELXL-2013 (Sheldrick, 2013)'
 
_refine_special_details
;
 ?
;
_refine_ls_structure_factor_coef  Fsqd
_refine_ls_matrix_type            full
_refine_ls_weighting_scheme       calc
_refine_ls_weighting_details
;
 w=1/[\s^2^(Fo^2^)+(0.0565P)^2^+0.5031P]
 where P=(Fo^2^+2Fc^2^)/3
;
_atom_sites_solution_primary      direct
_atom_sites_solution_secondary    difmap
_atom_sites_solution_hydrogens    geom
_refine_ls_hydrogen_treatment     mixed
_refine_ls_extinction_method      none
_refine_ls_extinction_coef        .
_refine_ls_abs_structure_details
;
 Classical Flack method preferred over Parsons because s.u. lower.
;
_refine_ls_abs_structure_Flack    -0.02(4)
_chemical_absolute_configuration  ad
_refine_ls_number_reflns          4205
_refine_ls_number_parameters      443
_refine_ls_number_restraints      3
_refine_ls_R_factor_all           0.0381
_refine_ls_R_factor_gt            0.0351
_refine_ls_wR_factor_ref          0.0971
_refine_ls_wR_factor_gt           0.0943
_refine_ls_goodness_of_fit_ref    1.048
_refine_ls_restrained_S_all       1.048
_refine_ls_shift/su_max           0.034
_refine_ls_shift/su_mean          0.007
 
loop_
 _atom_site_label
 _atom_site_type_symbol
 _atom_site_fract_x
 _atom_site_fract_y
 _atom_site_fract_z
 _atom_site_U_iso_or_equiv
 _atom_site_adp_type
 _atom_site_occupancy
 _atom_site_site_symmetry_order  
 _atom_site_calc_flag
 _atom_site_refinement_flags_posn
 _atom_site_refinement_flags_adp
 _atom_site_refinement_flags_occupancy
 _atom_site_disorder_assembly
 _atom_site_disorder_group
Cu1 Cu 0.60226(6) 0.66636(5) 0.14592(5) 0.0196(2) Uani 1 1 d . . . . .
Cu2 Cu 0.74167(7) 0.84499(5) -0.25049(5) 0.0199(2) Uani 1 1 d . . . . .
O1 O 0.7587(7) 0.7117(5) 0.3371(5) 0.0205(11) Uani 1 1 d . . . . .
O5 O 0.5917(7) 0.7975(6) -0.4405(5) 0.0222(12) Uani 1 1 d . . . . .
O4 O 0.8333(7) 0.8841(6) -0.0520(5) 0.0227(12) Uani 1 1 d . . . . .
O3 O 0.5087(7) 0.6294(6) -0.0535(5) 0.0228(12) Uani 1 1 d . . . . .
O2 O 0.9817(7) 0.8579(6) 0.4618(5) 0.0279(13) Uani 1 1 d . . . . .
N2 N 0.5706(8) 0.7267(7) -0.2234(6) 0.0196(13) Uani 1 1 d . . . . .
N5 N 0.4716(9) 0.4984(7) 0.1727(6) 0.0213(14) Uani 1 1 d . . . . .
O6 O 0.3627(8) 0.6588(7) -0.5695(5) 0.0298(13) Uani 1 1 d . . . . .
N1 N 0.7654(9) 0.7902(7) 0.1148(6) 0.0213(13) Uani 1 1 d . . . . .
N7 N 0.8737(8) 1.0143(7) -0.2756(6) 0.0214(13) Uani 1 1 d . . . . .
N9 N 0.8795(9) 0.6762(7) -0.2723(6) 0.0239(14) Uani 1 1 d . . . . .
N3 N 0.4650(8) 0.8383(7) 0.1736(6) 0.0201(13) Uani 1 1 d . . . . .
N6 N 0.3671(8) 0.5062(6) 0.2307(6) 0.0210(13) Uani 1 1 d . . . . .
H6 H 0.3630 0.5813 0.2707 0.025 Uiso 1 1 calc R U . . .
N8 N 0.9801(8) 1.0080(7) -0.3330(6) 0.0226(14) Uani 1 1 d . . . . .
H8 H 0.9854 0.9346 -0.3746 0.027 Uiso 1 1 calc R U . . .
C4 C 0.7471(10) 0.8039(8) -0.0062(7) 0.0204(15) Uani 1 1 d . . . . .
N10 N 0.8426(8) 0.6150(6) -0.3933(6) 0.0212(13) Uani 1 1 d . . . . .
H10 H 0.7815 0.6466 -0.4658 0.025 Uiso 1 1 calc R U . . .
N4 N 0.5006(9) 0.8953(7) 0.2962(6) 0.0249(15) Uani 1 1 d . . . . .
H4 H 0.5630 0.8629 0.3677 0.030 Uiso 1 1 calc R U . . .
C5 C 0.5946(10) 0.7088(8) -0.1015(8) 0.0194(14) Uani 1 1 d . . . . .
C14 C 0.2353(10) 1.1390(8) 0.1042(8) 0.0284(18) Uani 1 1 d . . . . .
H14A H 0.1925 1.1280 0.0087 0.034 Uiso 1 1 calc R U . . .
H14B H 0.1435 1.1208 0.1289 0.034 Uiso 1 1 calc R U . . .
C26 C 0.9970(10) 0.4796(8) -0.2584(8) 0.0230(16) Uani 1 1 d . . . . .
C1 C 0.8774(10) 0.8084(8) 0.3523(7) 0.0220(16) Uani 1 1 d . . . . .
C7 C 0.4631(9) 0.7074(8) -0.4604(7) 0.0221(15) Uani 1 1 d . . . . .
C11 C 0.3423(10) 1.0292(8) 0.1594(7) 0.0218(16) Uani 1 1 d . . . . .
C25 C 1.1098(10) 0.3737(7) -0.1963(8) 0.0248(16) Uani 1 1 d . . . . .
H25A H 1.2065 0.3960 -0.2141 0.030 Uiso 1 1 calc R U . . .
H25B H 1.1436 0.3825 -0.1014 0.030 Uiso 1 1 calc R U . . .
C10 C 0.3708(9) 0.9237(8) 0.0912(6) 0.0218(16) Uani 1 1 d . . . . .
C29 C 0.9738(9) 0.5937(7) -0.1881(8) 0.0218(16) Uani 1 1 d . . . . .
C18 C 0.2699(11) 0.3828(8) 0.2191(8) 0.0232(16) Uani 1 1 d . . . . .
C15 C 0.3139(10) 0.2894(8) 0.1468(7) 0.0225(16) Uani 1 1 d . . . . .
C22 C 1.0759(10) 1.1327(8) -0.3155(7) 0.0226(15) Uani 1 1 d . . . . .
C28 C 0.9126(11) 0.4983(7) -0.3876(8) 0.0252(16) Uani 1 1 d . . . . .
C24 C 1.0343(10) 1.2248(8) -0.2453(8) 0.0225(16) Uani 1 1 d . . . . .
C12 C 0.4278(11) 1.0079(9) 0.2936(7) 0.0262(17) Uani 1 1 d . . . . .
C21 C 0.9026(9) 1.1463(7) -0.2218(7) 0.0209(15) Uani 1 1 d . . . . .
C9 C 0.3126(12) 0.8972(9) -0.0562(8) 0.032(2) Uani 1 1 d . . . . .
H9A H 0.3147 0.8008 -0.0765 0.049 Uiso 1 1 calc R U . . .
H9B H 0.3826 0.9570 -0.0867 0.049 Uiso 1 1 calc R U . . .
H9C H 0.2033 0.9170 -0.0991 0.049 Uiso 1 1 calc R U . . .
C19 C 0.1458(11) 0.3672(9) 0.2763(9) 0.0325(18) Uani 1 1 d . . . . .
H19A H 0.1987 0.3619 0.3700 0.049 Uiso 1 1 calc R U . . .
H19B H 0.0696 0.2829 0.2381 0.049 Uiso 1 1 calc R U . . .
H19C H 0.0892 0.4467 0.2576 0.049 Uiso 1 1 calc R U . . .
C17 C 0.4363(10) 0.3649(8) 0.1206(7) 0.0240(16) Uani 1 1 d . . . . .
C30 C 1.0368(11) 0.6209(9) -0.0433(8) 0.0315(19) Uani 1 1 d . . . . .
H30A H 1.0187 0.7125 -0.0233 0.047 Uiso 1 1 calc R U . . .
H30B H 1.1513 0.6166 -0.0044 0.047 Uiso 1 1 calc R U . . .
H30C H 0.9811 0.5513 -0.0081 0.047 Uiso 1 1 calc R U . . .
C23 C 1.2072(11) 1.1518(9) -0.3676(8) 0.0305(18) Uani 1 1 d . . . . .
H23A H 1.3115 1.1531 -0.2959 0.046 Uiso 1 1 calc R U . . .
H23B H 1.2055 1.2389 -0.4093 0.046 Uiso 1 1 calc R U . . .
H23C H 1.1882 1.0756 -0.4307 0.046 Uiso 1 1 calc R U . . .
C6 C 0.4340(9) 0.6590(8) -0.3390(7) 0.0226(15) Uani 1 1 d . . . . .
H6A H 0.4272 0.5568 -0.3367 0.027 Uiso 1 1 calc R U . . .
C20 C 0.8121(12) 1.1924(9) -0.1498(8) 0.034(2) Uani 1 1 d . . . . .
H20A H 0.7249 1.2375 -0.2080 0.051 Uiso 1 1 calc R U . . .
H20B H 0.8837 1.2575 -0.0774 0.051 Uiso 1 1 calc R U . . .
H20C H 0.7680 1.1126 -0.1166 0.051 Uiso 1 1 calc R U . . .
C16 C 0.5311(10) 0.3138(8) 0.0465(8) 0.0284(18) Uani 1 1 d . . . . .
H16A H 0.4632 0.3022 -0.0463 0.043 Uiso 1 1 calc R U . . .
H16B H 0.5635 0.2254 0.0774 0.043 Uiso 1 1 calc R U . . .
H16C H 0.6261 0.3815 0.0617 0.043 Uiso 1 1 calc R U . . .
C13 C 0.4454(15) 1.0843(10) 0.4179(9) 0.045(2) Uani 1 1 d . . . . .
H13A H 0.3610 1.0432 0.4441 0.068 Uiso 1 1 calc R U . . .
H13B H 0.4366 1.1813 0.4027 0.068 Uiso 1 1 calc R U . . .
H13C H 0.5497 1.0774 0.4865 0.068 Uiso 1 1 calc R U . . .
C27 C 0.8926(12) 0.4173(9) -0.5096(8) 0.039(2) Uani 1 1 d . . . . .
H27A H 0.8349 0.4659 -0.5855 0.058 Uiso 1 1 calc R U . . .
H27B H 0.8322 0.3257 -0.5149 0.058 Uiso 1 1 calc R U . . .
H27C H 0.9978 0.4082 -0.5070 0.058 Uiso 1 1 calc R U . . .
C3 C 0.8623(7) 1.0268(5) 0.2310(4) 0.0324(10) Uani 1 1 d . . . . .
H3A H 0.8747 1.0709 0.1575 0.049 Uiso 1 1 calc R U . . .
H3B H 0.9406 1.0760 0.3118 0.049 Uiso 1 1 calc R U . . .
H3C H 0.7544 1.0295 0.2256 0.049 Uiso 1 1 calc R U . . .
C8 C 0.2730(6) 0.7029(6) -0.3486(5) 0.0369(11) Uani 1 1 d . . . . .
H8A H 0.2464 0.6647 -0.2787 0.055 Uiso 1 1 calc R U . . .
H8B H 0.1876 0.6677 -0.4322 0.055 Uiso 1 1 calc R U . . .
H8C H 0.2847 0.8034 -0.3410 0.055 Uiso 1 1 calc R U . . .
C2 C 0.8901(10) 0.8725(8) 0.2284(7) 0.0272(16) Uani 1 1 d . . . . .
H2 H 0.9980 0.8682 0.2295 0.033 Uiso 1 1 calc R U . . .
 
loop_
 _atom_site_aniso_label
 _atom_site_aniso_U_11
 _atom_site_aniso_U_22
 _atom_site_aniso_U_33
 _atom_site_aniso_U_23
 _atom_site_aniso_U_13
 _atom_site_aniso_U_12
Cu1 0.0250(5) 0.0198(5) 0.0158(4) 0.0055(4) 0.0104(4) 0.0020(4)
Cu2 0.0257(6) 0.0196(5) 0.0161(4) 0.0047(4) 0.0107(4) 0.0022(4)
O1 0.031(3) 0.022(2) 0.016(2) 0.0091(19) 0.015(2) 0.010(2)
O5 0.022(3) 0.025(3) 0.016(2) 0.004(2) 0.005(2) -0.001(2)
O4 0.025(3) 0.024(3) 0.020(3) 0.005(2) 0.012(2) 0.001(2)
O3 0.031(3) 0.023(3) 0.014(2) 0.004(2) 0.010(2) -0.001(2)
O2 0.032(3) 0.035(3) 0.014(2) 0.000(2) 0.007(2) 0.002(3)
N2 0.022(3) 0.022(3) 0.016(3) 0.002(2) 0.010(2) -0.003(2)
N5 0.035(4) 0.013(3) 0.021(3) 0.003(2) 0.017(3) 0.005(3)
O6 0.034(3) 0.034(3) 0.021(3) -0.004(2) 0.014(2) -0.004(3)
N1 0.026(3) 0.021(3) 0.018(3) 0.003(2) 0.010(2) 0.002(3)
N7 0.021(3) 0.026(3) 0.019(3) 0.008(3) 0.011(3) 0.002(3)
N9 0.029(3) 0.026(3) 0.017(3) 0.003(2) 0.011(2) 0.002(3)
N3 0.026(3) 0.018(3) 0.017(3) 0.002(2) 0.008(2) 0.008(3)
N6 0.032(4) 0.013(3) 0.023(3) 0.003(2) 0.017(3) 0.000(3)
N8 0.025(3) 0.027(3) 0.019(3) 0.004(2) 0.011(3) 0.006(3)
C4 0.030(4) 0.018(3) 0.015(3) 0.001(2) 0.010(3) 0.007(3)
N10 0.026(3) 0.018(3) 0.020(3) 0.008(2) 0.009(2) 0.009(3)
N4 0.037(4) 0.027(3) 0.012(3) 0.002(2) 0.009(2) 0.009(3)
C5 0.019(3) 0.019(3) 0.020(3) 0.006(3) 0.010(3) 0.000(3)
C14 0.018(3) 0.029(4) 0.029(3) 0.006(3) 0.002(3) 0.000(3)
C26 0.022(4) 0.020(3) 0.025(4) 0.002(3) 0.009(3) 0.001(3)
C1 0.034(4) 0.019(3) 0.016(3) 0.002(3) 0.012(3) 0.009(3)
C7 0.022(4) 0.026(4) 0.019(3) 0.005(3) 0.009(3) 0.005(3)
C11 0.028(4) 0.011(3) 0.023(3) 0.007(3) 0.007(3) 0.003(3)
C25 0.034(4) 0.012(3) 0.027(3) 0.004(2) 0.010(3) 0.008(3)
C10 0.020(4) 0.029(4) 0.009(3) 0.002(2) 0.000(2) 0.000(3)
C29 0.028(4) 0.010(3) 0.033(4) 0.005(2) 0.017(3) 0.003(3)
C18 0.028(4) 0.019(3) 0.024(3) 0.006(3) 0.011(3) 0.006(3)
C15 0.028(4) 0.016(3) 0.019(3) 0.004(3) 0.005(3) 0.005(3)
C22 0.025(4) 0.022(4) 0.020(3) 0.007(3) 0.010(3) -0.001(3)
C28 0.034(4) 0.009(3) 0.036(4) -0.001(3) 0.017(3) 0.004(3)
C24 0.023(4) 0.021(4) 0.023(3) 0.007(3) 0.009(3) 0.005(3)
C12 0.033(4) 0.033(4) 0.013(3) 0.009(2) 0.008(3) 0.009(3)
C21 0.025(4) 0.016(3) 0.020(3) 0.007(3) 0.008(3) -0.001(3)
C9 0.042(5) 0.032(4) 0.020(4) 0.005(3) 0.009(3) 0.007(4)
C19 0.035(4) 0.029(4) 0.040(4) 0.004(3) 0.024(3) 0.000(3)
C17 0.035(4) 0.023(4) 0.018(3) 0.005(3) 0.011(3) 0.015(3)
C30 0.041(5) 0.029(4) 0.023(4) 0.007(3) 0.008(3) 0.014(4)
C23 0.036(4) 0.025(4) 0.036(4) 0.004(3) 0.021(3) 0.000(3)
C6 0.027(3) 0.022(3) 0.016(3) 0.002(2) 0.008(2) -0.004(2)
C20 0.048(5) 0.031(4) 0.030(4) 0.005(3) 0.020(4) 0.016(4)
C16 0.032(4) 0.022(4) 0.039(4) 0.007(3) 0.022(4) 0.006(3)
C13 0.077(6) 0.041(4) 0.026(4) 0.002(3) 0.020(4) 0.032(4)
C27 0.056(5) 0.033(4) 0.023(3) 0.005(3) 0.006(3) 0.023(3)
C3 0.046(3) 0.025(2) 0.022(2) 0.0008(16) 0.0127(19) -0.0065(19)
C8 0.027(2) 0.059(3) 0.024(2) -0.001(2) 0.0131(18) -0.002(2)
C2 0.024(3) 0.037(4) 0.017(3) 0.003(2) 0.008(2) -0.003(3)
 
_geom_special_details
;
 All esds (except the esd in the dihedral angle between two l.s. planes)
 are estimated using the full covariance matrix.  The cell esds are taken
 into account individually in the estimation of esds in distances, angles
 and torsion angles; correlations between esds in cell parameters are only
 used when they are defined by crystal symmetry.  An approximate (isotropic)
 treatment of cell esds is used for estimating esds involving l.s. planes.
;
 
loop_
 _geom_bond_atom_site_label_1
 _geom_bond_atom_site_label_2
 _geom_bond_distance
 _geom_bond_site_symmetry_2
 _geom_bond_publ_flag
Cu1 N1 1.911(7) . ?
Cu1 N5 1.965(7) . ?
Cu1 O1 2.026(5) . ?
Cu1 O3 2.034(5) . ?
Cu1 N3 2.296(6) . ?
Cu2 N2 1.918(6) . ?
Cu2 N7 1.975(7) . ?
Cu2 O5 2.004(5) . ?
Cu2 O4 2.028(5) . ?
Cu2 N9 2.253(7) . ?
O1 C1 1.276(10) . ?
O5 C7 1.293(9) . ?
O4 C4 1.272(10) . ?
O3 C5 1.283(10) . ?
O2 C1 1.242(9) . ?
N2 C5 1.296(9) . ?
N2 C6 1.447(9) . ?
N5 C17 1.349(10) . ?
N5 N6 1.351(9) . ?
O6 C7 1.226(9) . ?
N1 C4 1.293(10) . ?
N1 C2 1.446(10) . ?
N7 N8 1.359(9) . ?
N7 C21 1.347(10) . ?
N9 C29 1.340(10) . ?
N9 N10 1.355(9) . ?
N3 C10 1.351(9) . ?
N3 N4 1.358(9) . ?
N6 C18 1.349(10) . ?
N6 H6 0.8600 . ?
N8 C22 1.345(11) . ?
N8 H8 0.8600 . ?
C4 C5 1.528(4) . ?
N10 C28 1.357(9) . ?
N10 H10 0.8600 . ?
N4 C12 1.342(11) . ?
N4 H4 0.8600 . ?
C14 C15 1.505(11) 1_565 ?
C14 C11 1.503(10) . ?
C14 H14A 0.9700 . ?
C14 H14B 0.9700 . ?
C26 C28 1.354(11) . ?
C26 C29 1.431(10) . ?
C26 C25 1.516(10) . ?
C1 C2 1.549(10) . ?
C7 C6 1.535(10) . ?
C11 C12 1.408(10) . ?
C11 C10 1.376(11) . ?
C25 C24 1.498(11) 1_545 ?
C25 H25A 0.9700 . ?
C25 H25B 0.9700 . ?
C10 C9 1.510(10) . ?
C29 C30 1.480(11) . ?
C18 C15 1.400(11) . ?
C18 C19 1.489(11) . ?
C15 C17 1.371(12) . ?
C15 C14 1.505(11) 1_545 ?
C22 C24 1.362(12) . ?
C22 C23 1.509(11) . ?
C28 C27 1.492(11) . ?
C24 C21 1.437(11) . ?
C24 C25 1.498(11) 1_565 ?
C12 C13 1.498(11) . ?
C21 C20 1.460(12) . ?
C9 H9A 0.9600 . ?
C9 H9B 0.9600 . ?
C9 H9C 0.9600 . ?
C19 H19A 0.9600 . ?
C19 H19B 0.9600 . ?
C19 H19C 0.9600 . ?
C17 C16 1.529(11) . ?
C30 H30A 0.9600 . ?
C30 H30B 0.9600 . ?
C30 H30C 0.9600 . ?
C23 H23A 0.9600 . ?
C23 H23B 0.9600 . ?
C23 H23C 0.9600 . ?
C6 C8 1.540(9) . ?
C6 H6A 0.9800 . ?
C20 H20A 0.9600 . ?
C20 H20B 0.9600 . ?
C20 H20C 0.9600 . ?
C16 H16A 0.9600 . ?
C16 H16B 0.9600 . ?
C16 H16C 0.9600 . ?
C13 H13A 0.9600 . ?
C13 H13B 0.9600 . ?
C13 H13C 0.9600 . ?
C27 H27A 0.9600 . ?
C27 H27B 0.9600 . ?
C27 H27C 0.9600 . ?
C3 C2 1.546(9) . ?
C3 H3A 0.9600 . ?
C3 H3B 0.9600 . ?
C3 H3C 0.9600 . ?
C8 H8A 0.9600 . ?
C8 H8B 0.9600 . ?
C8 H8C 0.9600 . ?
C2 H2 0.9800 . ?
 
loop_
 _geom_angle_atom_site_label_1
 _geom_angle_atom_site_label_2
 _geom_angle_atom_site_label_3
 _geom_angle
 _geom_angle_site_symmetry_1
 _geom_angle_site_symmetry_3
 _geom_angle_publ_flag
N1 Cu1 N5 163.4(3) . . ?
N1 Cu1 O1 82.7(2) . . ?
N5 Cu1 O1 97.4(2) . . ?
N1 Cu1 O3 82.6(3) . . ?
N5 Cu1 O3 94.2(2) . . ?
O1 Cu1 O3 162.8(2) . . ?
N1 Cu1 N3 96.0(3) . . ?
N5 Cu1 N3 100.6(3) . . ?
O1 Cu1 N3 87.4(2) . . ?
O3 Cu1 N3 103.0(2) . . ?
N2 Cu2 N7 160.8(3) . . ?
N2 Cu2 O5 82.1(2) . . ?
N7 Cu2 O5 97.6(2) . . ?
N2 Cu2 O4 83.6(2) . . ?
N7 Cu2 O4 93.4(2) . . ?
O5 Cu2 O4 163.8(2) . . ?
N2 Cu2 N9 98.1(3) . . ?
N7 Cu2 N9 101.0(3) . . ?
O5 Cu2 N9 87.2(2) . . ?
O4 Cu2 N9 102.4(2) . . ?
C1 O1 Cu1 113.2(5) . . ?
C7 O5 Cu2 115.0(5) . . ?
C4 O4 Cu2 108.9(5) . . ?
C5 O3 Cu1 109.9(5) . . ?
C5 N2 C6 126.4(7) . . ?
C5 N2 Cu2 115.8(5) . . ?
C6 N2 Cu2 117.6(5) . . ?
C17 N5 N6 104.7(7) . . ?
C17 N5 Cu1 131.8(6) . . ?
N6 N5 Cu1 122.2(5) . . ?
C4 N1 C2 125.2(7) . . ?
C4 N1 Cu1 117.9(6) . . ?
C2 N1 Cu1 116.6(5) . . ?
N8 N7 C21 106.9(7) . . ?
N8 N7 Cu2 122.4(5) . . ?
C21 N7 Cu2 129.5(5) . . ?
C29 N9 N10 104.5(7) . . ?
C29 N9 Cu2 134.0(6) . . ?
N10 N9 Cu2 119.8(5) . . ?
C10 N3 N4 104.4(6) . . ?
C10 N3 Cu1 133.9(5) . . ?
N4 N3 Cu1 120.2(5) . . ?
C18 N6 N5 112.5(6) . . ?
C18 N6 H6 123.8 . . ?
N5 N6 H6 123.8 . . ?
N7 N8 C22 110.4(7) . . ?
N7 N8 H8 124.8 . . ?
C22 N8 H8 124.8 . . ?
O4 C4 N1 129.6(8) . . ?
O4 C4 C5 119.3(5) . . ?
N1 C4 C5 111.1(6) . . ?
C28 N10 N9 112.5(6) . . ?
C28 N10 H10 123.7 . . ?
N9 N10 H10 123.7 . . ?
N3 N4 C12 112.6(6) . . ?
N3 N4 H4 123.7 . . ?
C12 N4 H4 123.7 . . ?
N2 C5 O3 129.9(8) . . ?
N2 C5 C4 111.6(5) . . ?
O3 C5 C4 118.4(5) . . ?
C15 C14 C11 116.4(6) 1_565 . ?
C15 C14 H14A 108.2 1_565 . ?
C11 C14 H14A 108.2 . . ?
C15 C14 H14B 108.2 1_565 . ?
C11 C14 H14B 108.2 . . ?
H14A C14 H14B 107.3 . . ?
C28 C26 C29 105.1(7) . . ?
C28 C26 C25 129.3(8) . . ?
C29 C26 C25 125.2(7) . . ?
O2 C1 O1 123.7(7) . . ?
O2 C1 C2 117.5(7) . . ?
O1 C1 C2 118.8(6) . . ?
O6 C7 O5 124.5(7) . . ?
O6 C7 C6 117.9(7) . . ?
O5 C7 C6 117.6(6) . . ?
C12 C11 C10 105.2(7) . . ?
C12 C11 C14 126.8(8) . . ?
C10 C11 C14 127.9(7) . . ?
C24 C25 C26 113.7(7) 1_545 . ?
C24 C25 H25A 108.8 1_545 . ?
C26 C25 H25A 108.8 . . ?
C24 C25 H25B 108.8 1_545 . ?
C26 C25 H25B 108.8 . . ?
H25A C25 H25B 107.7 . . ?
N3 C10 C11 111.6(6) . . ?
N3 C10 C9 119.9(7) . . ?
C11 C10 C9 128.4(7) . . ?
N9 C29 C26 110.6(7) . . ?
N9 C29 C30 122.1(7) . . ?
C26 C29 C30 127.3(7) . . ?
N6 C18 C15 105.7(7) . . ?
N6 C18 C19 121.6(7) . . ?
C15 C18 C19 132.7(8) . . ?
C18 C15 C17 105.8(7) . . ?
C18 C15 C14 125.6(8) . 1_545 ?
C17 C15 C14 128.5(8) . 1_545 ?
N8 C22 C24 109.1(7) . . ?
N8 C22 C23 120.6(8) . . ?
C24 C22 C23 130.3(8) . . ?
N10 C28 C26 107.2(7) . . ?
N10 C28 C27 121.5(7) . . ?
C26 C28 C27 131.3(7) . . ?
C22 C24 C21 104.9(7) . . ?
C22 C24 C25 129.2(8) . 1_565 ?
C21 C24 C25 125.9(8) . 1_565 ?
N4 C12 C11 106.1(7) . . ?
N4 C12 C13 121.7(7) . . ?
C11 C12 C13 132.2(8) . . ?
N7 C21 C24 108.7(7) . . ?
N7 C21 C20 122.6(7) . . ?
C24 C21 C20 128.6(7) . . ?
C10 C9 H9A 109.5 . . ?
C10 C9 H9B 109.5 . . ?
H9A C9 H9B 109.5 . . ?
C10 C9 H9C 109.5 . . ?
H9A C9 H9C 109.5 . . ?
H9B C9 H9C 109.5 . . ?
C18 C19 H19A 109.5 . . ?
C18 C19 H19B 109.5 . . ?
H19A C19 H19B 109.5 . . ?
C18 C19 H19C 109.5 . . ?
H19A C19 H19C 109.5 . . ?
H19B C19 H19C 109.5 . . ?
N5 C17 C15 111.3(7) . . ?
N5 C17 C16 120.7(7) . . ?
C15 C17 C16 128.0(7) . . ?
C29 C30 H30A 109.5 . . ?
C29 C30 H30B 109.5 . . ?
H30A C30 H30B 109.5 . . ?
C29 C30 H30C 109.5 . . ?
H30A C30 H30C 109.5 . . ?
H30B C30 H30C 109.5 . . ?
C22 C23 H23A 109.5 . . ?
C22 C23 H23B 109.5 . . ?
H23A C23 H23B 109.5 . . ?
C22 C23 H23C 109.5 . . ?
H23A C23 H23C 109.5 . . ?
H23B C23 H23C 109.5 . . ?
N2 C6 C8 111.4(6) . . ?
N2 C6 C7 107.4(6) . . ?
C8 C6 C7 108.1(6) . . ?
N2 C6 H6A 110.0 . . ?
C8 C6 H6A 110.0 . . ?
C7 C6 H6A 110.0 . . ?
C21 C20 H20A 109.5 . . ?
C21 C20 H20B 109.5 . . ?
H20A C20 H20B 109.5 . . ?
C21 C20 H20C 109.5 . . ?
H20A C20 H20C 109.5 . . ?
H20B C20 H20C 109.5 . . ?
C17 C16 H16A 109.5 . . ?
C17 C16 H16B 109.5 . . ?
H16A C16 H16B 109.5 . . ?
C17 C16 H16C 109.5 . . ?
H16A C16 H16C 109.5 . . ?
H16B C16 H16C 109.5 . . ?
C12 C13 H13A 109.5 . . ?
C12 C13 H13B 109.5 . . ?
H13A C13 H13B 109.5 . . ?
C12 C13 H13C 109.5 . . ?
H13A C13 H13C 109.5 . . ?
H13B C13 H13C 109.5 . . ?
C28 C27 H27A 109.5 . . ?
C28 C27 H27B 109.5 . . ?
H27A C27 H27B 109.5 . . ?
C28 C27 H27C 109.5 . . ?
H27A C27 H27C 109.5 . . ?
H27B C27 H27C 109.5 . . ?
C2 C3 H3A 109.5 . . ?
C2 C3 H3B 109.5 . . ?
H3A C3 H3B 109.5 . . ?
C2 C3 H3C 109.5 . . ?
H3A C3 H3C 109.5 . . ?
H3B C3 H3C 109.5 . . ?
C6 C8 H8A 109.5 . . ?
C6 C8 H8B 109.5 . . ?
H8A C8 H8B 109.5 . . ?
C6 C8 H8C 109.5 . . ?
H8A C8 H8C 109.5 . . ?
H8B C8 H8C 109.5 . . ?
N1 C2 C3 111.7(6) . . ?
N1 C2 C1 107.0(6) . . ?
C3 C2 C1 107.5(6) . . ?
N1 C2 H2 110.2 . . ?
C3 C2 H2 110.2 . . ?
C1 C2 H2 110.2 . . ?
 
loop_
 _geom_torsion_atom_site_label_1
 _geom_torsion_atom_site_label_2
 _geom_torsion_atom_site_label_3
 _geom_torsion_atom_site_label_4
 _geom_torsion
 _geom_torsion_site_symmetry_1
 _geom_torsion_site_symmetry_2
 _geom_torsion_site_symmetry_3
 _geom_torsion_site_symmetry_4
 _geom_torsion_publ_flag
C17 N5 N6 C18 1.0(8) . . . . ?
Cu1 N5 N6 C18 169.3(5) . . . . ?
C21 N7 N8 C22 0.4(8) . . . . ?
Cu2 N7 N8 C22 -168.2(5) . . . . ?
Cu2 O4 C4 N1 177.2(7) . . . . ?
Cu2 O4 C4 C5 -4.5(6) . . . . ?
C2 N1 C4 O4 3.3(14) . . . . ?
Cu1 N1 C4 O4 176.1(7) . . . . ?
C2 N1 C4 C5 -175.1(6) . . . . ?
Cu1 N1 C4 C5 -2.3(6) . . . . ?
C29 N9 N10 C28 -0.9(9) . . . . ?
Cu2 N9 N10 C28 -168.0(6) . . . . ?
C10 N3 N4 C12 2.6(9) . . . . ?
Cu1 N3 N4 C12 170.6(6) . . . . ?
C6 N2 C5 O3 0.6(15) . . . . ?
Cu2 N2 C5 O3 -174.8(7) . . . . ?
C6 N2 C5 C4 -176.8(6) . . . . ?
Cu2 N2 C5 C4 7.7(6) . . . . ?
Cu1 O3 C5 N2 -173.9(7) . . . . ?
Cu1 O3 C5 C4 3.4(6) . . . . ?
O4 C4 C5 N2 -1.8(6) . . . . ?
N1 C4 C5 N2 176.8(10) . . . . ?
O4 C4 C5 O3 -179.6(10) . . . . ?
N1 C4 C5 O3 -1.0(6) . . . . ?
Cu1 O1 C1 O2 175.6(6) . . . . ?
Cu1 O1 C1 C2 -2.1(9) . . . . ?
Cu2 O5 C7 O6 -175.2(7) . . . . ?
Cu2 O5 C7 C6 5.2(9) . . . . ?
C15 C14 C11 C12 58.2(12) 1_565 . . . ?
C15 C14 C11 C10 -125.8(9) 1_565 . . . ?
C28 C26 C25 C24 -53.6(12) . . . 1_545 ?
C29 C26 C25 C24 134.3(8) . . . 1_545 ?
N4 N3 C10 C11 -2.2(9) . . . . ?
Cu1 N3 C10 C11 -167.7(6) . . . . ?
N4 N3 C10 C9 177.2(7) . . . . ?
Cu1 N3 C10 C9 11.6(11) . . . . ?
C12 C11 C10 N3 1.0(10) . . . . ?
C14 C11 C10 N3 -175.7(7) . . . . ?
C12 C11 C10 C9 -178.3(8) . . . . ?
C14 C11 C10 C9 5.0(15) . . . . ?
N10 N9 C29 C26 0.5(9) . . . . ?
Cu2 N9 C29 C26 164.9(6) . . . . ?
N10 N9 C29 C30 -177.8(7) . . . . ?
Cu2 N9 C29 C30 -13.4(12) . . . . ?
C28 C26 C29 N9 0.0(10) . . . . ?
C25 C26 C29 N9 173.7(7) . . . . ?
C28 C26 C29 C30 178.2(8) . . . . ?
C25 C26 C29 C30 -8.1(14) . . . . ?
N5 N6 C18 C15 -0.8(9) . . . . ?
N5 N6 C18 C19 179.8(7) . . . . ?
N6 C18 C15 C17 0.2(9) . . . . ?
C19 C18 C15 C17 179.6(8) . . . . ?
N6 C18 C15 C14 -177.8(7) . . . 1_545 ?
C19 C18 C15 C14 1.6(14) . . . 1_545 ?
N7 N8 C22 C24 0.1(8) . . . . ?
N7 N8 C22 C23 178.6(7) . . . . ?
N9 N10 C28 C26 0.9(9) . . . . ?
N9 N10 C28 C27 -177.9(8) . . . . ?
C29 C26 C28 N10 -0.5(9) . . . . ?
C25 C26 C28 N10 -173.9(8) . . . . ?
C29 C26 C28 C27 178.1(9) . . . . ?
C25 C26 C28 C27 4.8(16) . . . . ?
N8 C22 C24 C21 -0.6(9) . . . . ?
C23 C22 C24 C21 -178.9(8) . . . . ?
N8 C22 C24 C25 177.1(7) . . . 1_565 ?
C23 C22 C24 C25 -1.2(14) . . . 1_565 ?
N3 N4 C12 C11 -2.0(10) . . . . ?
N3 N4 C12 C13 177.8(9) . . . . ?
C10 C11 C12 N4 0.6(9) . . . . ?
C14 C11 C12 N4 177.3(8) . . . . ?
C10 C11 C12 C13 -179.2(10) . . . . ?
C14 C11 C12 C13 -2.5(16) . . . . ?
N8 N7 C21 C24 -0.8(8) . . . . ?
Cu2 N7 C21 C24 166.8(5) . . . . ?
N8 N7 C21 C20 -179.3(7) . . . . ?
Cu2 N7 C21 C20 -11.7(11) . . . . ?
C22 C24 C21 N7 0.9(8) . . . . ?
C25 C24 C21 N7 -176.9(7) 1_565 . . . ?
C22 C24 C21 C20 179.3(7) . . . . ?
C25 C24 C21 C20 1.5(13) 1_565 . . . ?
N6 N5 C17 C15 -0.9(8) . . . . ?
Cu1 N5 C17 C15 -167.5(6) . . . . ?
N6 N5 C17 C16 -179.5(6) . . . . ?
Cu1 N5 C17 C16 13.9(11) . . . . ?
C18 C15 C17 N5 0.4(9) . . . . ?
C14 C15 C17 N5 178.3(7) 1_545 . . . ?
C18 C15 C17 C16 178.9(7) . . . . ?
C14 C15 C17 C16 -3.2(13) 1_545 . . . ?
C5 N2 C6 C8 64.6(10) . . . . ?
Cu2 N2 C6 C8 -120.0(5) . . . . ?
C5 N2 C6 C7 -177.2(7) . . . . ?
Cu2 N2 C6 C7 -1.8(8) . . . . ?
O6 C7 C6 N2 178.1(7) . . . . ?
O5 C7 C6 N2 -2.4(10) . . . . ?
O6 C7 C6 C8 -61.6(9) . . . . ?
O5 C7 C6 C8 117.9(7) . . . . ?
C4 N1 C2 C3 69.0(10) . . . . ?
Cu1 N1 C2 C3 -103.9(6) . . . . ?
C4 N1 C2 C1 -173.6(7) . . . . ?
Cu1 N1 C2 C1 13.5(8) . . . . ?
O2 C1 C2 N1 175.2(7) . . . . ?
O1 C1 C2 N1 -7.0(10) . . . . ?
O2 C1 C2 C3 -64.7(9) . . . . ?
O1 C1 C2 C3 113.1(7) . . . . ?
 
loop_
 _geom_hbond_atom_site_label_D 
 _geom_hbond_atom_site_label_H 
 _geom_hbond_atom_site_label_A 
 _geom_hbond_distance_DH 
 _geom_hbond_distance_HA 
 _geom_hbond_distance_DA 
 _geom_hbond_angle_DHA 
 _geom_hbond_site_symmetry_A 
N6 H6 O6  0.86 1.92 2.668(9) 144.7 1_556
N8 H8 O2  0.86 1.94 2.695(9) 145.7 1_554
N10 H10 O1  0.86 2.21 2.964(8) 145.9 1_554
N4 H4 O5  0.86 2.14 2.899(8) 146.2 1_556
 
_refine_diff_density_max    0.490
_refine_diff_density_min   -0.659
_refine_diff_density_rms    0.065

_shelxl_version_number 2013-2

_shelx_res_file
;
TITL a in P1
CELL 1.54184 9.0711 9.6401 11.0829 90.337 113.571 98.063
ZERR 1 0.0005 0.0004 0.0007 0.004 0.006 0.004
LATT -1

SFAC C H N O Cu
UNIT 30 40 10 6 2

L.S. 30
PLAN  10
BOND
BOND $H
HTAB
eqiv $1 x,y,z+1
eqiv $2 x, y, z-1
HTAB N6 O6_$1
HTAB N8 O2_$2
HTAB N10 O1_$2
HTAB N4 O5_$1
CONF
SIZE 0.2 0.1 0.1
ACTA
fmap 2
REM <HKL>C:/Users/lina/Desktop/tmp/a.hkl</HKL>

WGHT    0.056500    0.503100
FVAR       0.26018
CU1   5    0.602258    0.666358    0.145923    11.00000    0.02504    0.01980 =
         0.01579    0.00548    0.01044    0.00204
CU2   5    0.741673    0.844994   -0.250494    11.00000    0.02574    0.01955 =
         0.01609    0.00473    0.01066    0.00222
O1    4    0.758700    0.711690    0.337134    11.00000    0.03066    0.02200 =
         0.01596    0.00906    0.01499    0.00961
O5    4    0.591745    0.797550   -0.440524    11.00000    0.02171    0.02477 =
         0.01639    0.00362    0.00540   -0.00091
O4    4    0.833322    0.884051   -0.052020    11.00000    0.02509    0.02446 =
         0.02025    0.00461    0.01167    0.00123
O3    4    0.508741    0.629382   -0.053518    11.00000    0.03064    0.02304 =
         0.01368    0.00396    0.00970   -0.00108
O2    4    0.981728    0.857881    0.461759    11.00000    0.03202    0.03516 =
         0.01375    0.00041    0.00746    0.00236
N2    3    0.570604    0.726667   -0.223398    11.00000    0.02153    0.02208 =
         0.01582    0.00240    0.01029   -0.00332
N5    3    0.471626    0.498424    0.172675    11.00000    0.03541    0.01343 =
         0.02066    0.00267    0.01666    0.00539
O6    4    0.362681    0.658833   -0.569486    11.00000    0.03358    0.03417 =
         0.02114   -0.00366    0.01352   -0.00410
N1    3    0.765414    0.790159    0.114789    11.00000    0.02620    0.02084 =
         0.01759    0.00291    0.00990    0.00243
N7    3    0.873683    1.014348   -0.275604    11.00000    0.02090    0.02639 =
         0.01887    0.00790    0.01055    0.00168
N9    3    0.879492    0.676165   -0.272285    11.00000    0.02921    0.02572 =
         0.01735    0.00345    0.01082    0.00217
N3    3    0.465002    0.838303    0.173595    11.00000    0.02570    0.01839 =
         0.01736    0.00237    0.00848    0.00772
N6    3    0.367104    0.506157    0.230740    11.00000    0.03233    0.01305 =
         0.02264    0.00270    0.01731    0.00044
AFIX  43
H6    2    0.362963    0.581323    0.270683    11.00000   -1.20000
AFIX   0
N8    3    0.980070    1.007984   -0.332986    11.00000    0.02484    0.02676 =
         0.01855    0.00378    0.01061    0.00577
AFIX  43
H8    2    0.985389    0.934557   -0.374598    11.00000   -1.20000
AFIX   0
C4    1    0.747128    0.803926   -0.006184    11.00000    0.03035    0.01799 =
         0.01455    0.00079    0.00974    0.00686
N10   3    0.842569    0.615007   -0.393327    11.00000    0.02622    0.01835 =
         0.02040    0.00752    0.00891    0.00878
AFIX  43
H10   2    0.781524    0.646649   -0.465817    11.00000   -1.20000
AFIX   0
N4    3    0.500639    0.895347    0.296247    11.00000    0.03652    0.02650 =
         0.01248    0.00175    0.00929    0.00914
AFIX  43
H4    2    0.563039    0.862915    0.367722    11.00000   -1.20000
AFIX   0
C5    1    0.594647    0.708760   -0.101528    11.00000    0.01903    0.01944 =
         0.02020    0.00638    0.00953   -0.00021
C14   1    0.235282    1.139006    0.104243    11.00000    0.01800    0.02932 =
         0.02948    0.00593    0.00199    0.00046
AFIX  23
H14A  2    0.192528    1.127980    0.008737    11.00000   -1.20000
H14B  2    0.143451    1.120766    0.128890    11.00000   -1.20000
AFIX   0
C26   1    0.997047    0.479615   -0.258352    11.00000    0.02190    0.02045 =
         0.02501    0.00178    0.00851    0.00097
C1    1    0.877382    0.808378    0.352314    11.00000    0.03435    0.01919 =
         0.01581    0.00161    0.01193    0.00940
C7    1    0.463144    0.707412   -0.460419    11.00000    0.02220    0.02569 =
         0.01941    0.00491    0.00915    0.00470
C11   1    0.342292    1.029191    0.159439    11.00000    0.02778    0.01115 =
         0.02344    0.00663    0.00717    0.00336
C25   1    1.109778    0.373735   -0.196301    11.00000    0.03437    0.01185 =
         0.02688    0.00402    0.00954    0.00816
AFIX  23
H25A  2    1.206484    0.395995   -0.214126    11.00000   -1.20000
H25B  2    1.143627    0.382486   -0.101407    11.00000   -1.20000
AFIX   0
C10   1    0.370777    0.923727    0.091223    11.00000    0.01981    0.02909 =
         0.00948    0.00212   -0.00034    0.00046
C29   1    0.973768    0.593726   -0.188081    11.00000    0.02781    0.00967 =
         0.03283    0.00548    0.01723    0.00310
C18   1    0.269947    0.382781    0.219060    11.00000    0.02835    0.01859 =
         0.02425    0.00573    0.01140    0.00602
C15   1    0.313871    0.289396    0.146763    11.00000    0.02788    0.01646 =
         0.01944    0.00396    0.00521    0.00517
C22   1    1.075857    1.132739   -0.315504    11.00000    0.02485    0.02227 =
         0.02032    0.00741    0.01025   -0.00100
C28   1    0.912558    0.498291   -0.387550    11.00000    0.03384    0.00915 =
         0.03593   -0.00139    0.01737    0.00404
C24   1    1.034320    1.224775   -0.245289    11.00000    0.02299    0.02139 =
         0.02283    0.00722    0.00864    0.00451
C12   1    0.427795    1.007854    0.293641    11.00000    0.03290    0.03319 =
         0.01293    0.00902    0.00833    0.00893
C21   1    0.902622    1.146291   -0.221789    11.00000    0.02462    0.01605 =
         0.02002    0.00727    0.00805   -0.00058
C9    1    0.312551    0.897228   -0.056179    11.00000    0.04190    0.03217 =
         0.02047    0.00495    0.00920    0.00749
AFIX 137
H9A   2    0.314734    0.800800   -0.076521    11.00000   -1.50000
H9B   2    0.382599    0.957049   -0.086659    11.00000   -1.50000
H9C   2    0.203302    0.916988   -0.099067    11.00000   -1.50000
AFIX   0
C19   1    0.145825    0.367198    0.276273    11.00000    0.03506    0.02945 =
         0.03979    0.00400    0.02377   -0.00017
AFIX 137
H19A  2    0.198672    0.361905    0.370049    11.00000   -1.50000
H19B  2    0.069590    0.282933    0.238052    11.00000   -1.50000
H19C  2    0.089184    0.446707    0.257605    11.00000   -1.50000
AFIX   0
C17   1    0.436306    0.364912    0.120599    11.00000    0.03490    0.02285 =
         0.01782    0.00507    0.01061    0.01547
C30   1    1.036758    0.620926   -0.043275    11.00000    0.04095    0.02860 =
         0.02318    0.00701    0.00812    0.01434
AFIX 137
H30A  2    1.018663    0.712455   -0.023343    11.00000   -1.50000
H30B  2    1.151330    0.616640   -0.004416    11.00000   -1.50000
H30C  2    0.981137    0.551327   -0.008139    11.00000   -1.50000
AFIX   0
C23   1    1.207191    1.151810   -0.367597    11.00000    0.03566    0.02487 =
         0.03604    0.00446    0.02111    0.00032
AFIX 137
H23A  2    1.311450    1.153056   -0.295906    11.00000   -1.50000
H23B  2    1.205497    1.238934   -0.409284    11.00000   -1.50000
H23C  2    1.188192    1.075575   -0.430747    11.00000   -1.50000
AFIX   0
C6    1    0.434044    0.659020   -0.338964    11.00000    0.02677    0.02208 =
         0.01605    0.00165    0.00825   -0.00447
AFIX  13
H6A   2    0.427174    0.556772   -0.336707    11.00000   -1.20000
AFIX   0
C20   1    0.812052    1.192424   -0.149785    11.00000    0.04821    0.03051 =
         0.03021    0.00521    0.02034    0.01551
AFIX 137
H20A  2    0.724914    1.237503   -0.207986    11.00000   -1.50000
H20B  2    0.883719    1.257473   -0.077437    11.00000   -1.50000
H20C  2    0.767980    1.112625   -0.116593    11.00000   -1.50000
AFIX   0
C16   1    0.531082    0.313755    0.046450    11.00000    0.03236    0.02152 =
         0.03927    0.00737    0.02203    0.00588
AFIX 137
H16A  2    0.463229    0.302204   -0.046316    11.00000   -1.50000
H16B  2    0.563472    0.225449    0.077387    11.00000   -1.50000
H16C  2    0.626064    0.381488    0.061715    11.00000   -1.50000
AFIX   0
C13   1    0.445359    1.084314    0.417890    11.00000    0.07665    0.04092 =
         0.02554    0.00200    0.02036    0.03201
AFIX 137
H13A  2    0.360987    1.043221    0.444132    11.00000   -1.50000
H13B  2    0.436605    1.181340    0.402669    11.00000   -1.50000
H13C  2    0.549739    1.077374    0.486483    11.00000   -1.50000
AFIX   0
C27   1    0.892605    0.417296   -0.509632    11.00000    0.05595    0.03343 =
         0.02258    0.00452    0.00572    0.02339
AFIX 137
H27A  2    0.834939    0.465875   -0.585505    11.00000   -1.50000
H27B  2    0.832187    0.325692   -0.514910    11.00000   -1.50000
H27C  2    0.997850    0.408196   -0.507049    11.00000   -1.50000
AFIX   0
C3    1    0.862331    1.026836    0.231046    11.00000    0.04598    0.02495 =
         0.02160    0.00079    0.01271   -0.00646
AFIX 137
H3A   2    0.874670    1.070870    0.157459    11.00000   -1.50000
H3B   2    0.940604    1.075981    0.311769    11.00000   -1.50000
H3C   2    0.754443    1.029518    0.225551    11.00000   -1.50000
AFIX   0
C8    1    0.273012    0.702853   -0.348645    11.00000    0.02717    0.05912 =
         0.02403   -0.00132    0.01308   -0.00240
AFIX 137
H8A   2    0.246425    0.664715   -0.278734    11.00000   -1.50000
H8B   2    0.187573    0.667731   -0.432204    11.00000   -1.50000
H8C   2    0.284667    0.803435   -0.341031    11.00000   -1.50000
AFIX   0
C2    1    0.890148    0.872469    0.228401    11.00000    0.02447    0.03750 =
         0.01687    0.00338    0.00801   -0.00303
AFIX  13
H2    2    0.997976    0.868247    0.229474    11.00000   -1.20000
AFIX   0
HKLF 4

REM  a in P1
REM R1 =  0.0351 for    3914 Fo > 4sig(Fo)  and  0.0381 for all    4205 data
REM    443 parameters refined using      3 restraints

END

WGHT      0.0563      0.5120

REM Instructions for potential hydrogen bonds
HTAB N6 O6_$1
HTAB N8 O2_$2
HTAB N10 O1_$2
HTAB N10 O5
HTAB N4 O1
HTAB N4 O5_$1
HTAB C9 O3
HTAB C30 O4
HTAB C23 O2_$2
HTAB C20 O4
HTAB C27 O1_$2

REM Highest difference peak  0.490,  deepest hole -0.659,  1-sigma level  0.065
Q1    1   0.7026  0.7261  0.1562  11.00000  0.05    0.49
Q2    1   0.6394  0.7860 -0.2537  11.00000  0.05    0.44
Q3    1   0.6844  0.7593 -0.0445  11.00000  0.05    0.32
Q4    1   0.5221  0.7771 -0.4769  11.00000  0.05    0.30
Q5    1   0.9701  1.1992 -0.2393  11.00000  0.05    0.29
Q6    1   0.4946  0.5705  0.1426  11.00000  0.05    0.27
Q7    1   0.2941  0.3344  0.1780  11.00000  0.05    0.27
Q8    1   0.8368  0.9604 -0.2553  11.00000  0.05    0.26
Q9    1   0.9873  0.5220 -0.2168  11.00000  0.05    0.25
Q10   1   0.8881  1.0897 -0.2389  11.00000  0.05    0.25
;
_shelx_res_checksum   61283

_shelx_hkl_file
;
   0   0   1   42.34    0.46
   0   0   2  424.64    2.09
   0   0   3   68.86    1.06
   0   0   4   88.02    1.41
   0   0   5  196.77    2.46
   0   0   6   97.00    1.96
   0   0   7   16.94    0.91
   0   0   8   15.53    0.89
   0   0   8   15.20    0.93
   0   0   9    0.69    0.29
   0   0  10   47.87    1.61
   0   0  11    5.93    0.56
   0   0  12    4.97    0.39
   0   0 -12    4.49    0.36
   0   0 -12    4.90    0.43
   0   1 -12    9.28    0.45
   0   1 -12   12.50    0.66
   0  -1  11   11.56    0.75
   0   1 -11   12.43    0.82
   0  -1  10   50.00    1.67
   0  -1   9   12.83    0.89
   0  -1   8    1.21    0.32
   0  -1   8    1.58    0.34
   0  -1   7   20.93    1.00
   0  -1   6    0.19    0.18
   0  -1   5   86.26    1.60
   0  -1   4   88.33    1.40
   0  -1   3   52.62    0.91
   0  -1   2   30.67    0.55
   0  -1   1    7.06    0.18
   0   1   0  610.48    1.45
   0   1   1   12.44    0.23
   0   1   1   13.08    0.30
   0   1   2   15.11    0.41
   0   1   3   40.81    0.85
   0   1   3   40.25    0.80
   0   1   4    1.92    0.25
   0   1   5  291.95    3.02
   0   1   6   64.80    1.62
   0   1   7   12.11    0.80
   0   1   8    5.94    0.62
   0   1   8    5.12    0.55
   0   1   8    5.82    0.56
   0   1   9   17.71    1.00
   0   1   9   16.82    1.00
   0   1  10   13.97    0.82
   0   1  10   13.29    0.85
   0  -1 -12    0.31    0.16
   0  -1 -12    0.31    0.16
   0   1  12    0.34    0.12
   0   2 -12    1.28    0.26
   0  -2  12    1.27    0.25
   0   2 -11   25.88    1.13
   0  -2  11   26.78    1.10
   0  -2  10   26.59    1.22
   0   2 -10   26.89    1.31
   0   2 -10   25.77    1.27
   0  -2   9    0.14    0.20
   0  -2   8    2.38    0.39
   0  -2   8    2.16    0.39
   0  -2   7   56.54    1.63
   0  -2   6   31.54    1.10
   0  -2   5   40.79    1.10
   0  -2   4   76.48    1.30
   0  -2   3   65.68    1.00
   0  -2   2    9.62    0.31
   0   2  -2   10.01    0.39
   0  -2   1   98.74    0.65
   0   2  -1   98.10    0.91
   0   2   0   96.25    0.83
   0   2   0   93.62    0.91
   0   2   1    9.59    0.29
   0   2   1    9.80    0.32
   0   2   2   60.29    0.91
   0   2   3   43.91    0.91
   0   2   3   41.55    0.89
   0   2   4  288.35    2.69
   0   2   4  272.66    2.60
   0   2   5   85.91    1.69
   0   2   6   46.47    1.40
   0   2   7    5.47    0.55
   0   2   8   49.96    1.72
   0   2   8   47.00    1.51
   0   2   8   51.02    1.70
   0   2   9   25.89    1.14
   0   2   9   27.58    1.26
   0   2  10    3.91    0.45
   0  -2 -11   22.74    1.02
   0   2  11   19.93    0.79
   0   2  11   20.64    0.83
   0  -2 -12    0.24    0.16
   0  -2 -12    0.29    0.14
   0  -3  12   17.74    0.68
   0   3 -12   17.12    0.67
   0   3 -11   34.50    1.25
   0  -3  11   31.40    1.16
   0  -3  10    0.08    0.19
   0   3 -10    0.72    0.32
   0   3  -9    2.21    0.46
   0  -3   9    1.76    0.38
   0   3  -9    1.62    0.39
   0   3  -8   15.10    1.00
   0  -3   8   14.15    0.90
   0   3  -8   13.28    0.80
   0  -3   7   28.95    1.14
   0   3  -7   27.73    1.27
   0  -3   6  124.64    2.16
   0   3  -5   13.75    0.76
   0  -3   5   13.86    0.64
   0   3  -4   42.93    1.15
   0  -3   4   44.39    0.98
   0   3  -3    4.98    0.38
   0  -3   3    5.65    0.30
   0  -3   2   58.88    0.71
   0   3  -2   58.42    1.09
   0   3  -1  240.87    1.53
   0   3  -1  240.98    1.77
   0   3  -1  243.13    2.05
   0   3   0   12.55    0.42
   0   3   0   12.86    0.39
   0   3   0   12.71    0.44
   0   3   1    3.67    0.25
   0   3   1    3.09    0.24
   0   3   1    3.31    0.23
   0   3   2    2.11    0.17
   0   3   2    2.03    0.19
   0   3   2    2.23    0.22
   0   3   3   30.71    0.79
   0   3   3   30.24    0.82
   0   3   4  108.19    1.70
   0   3   4  108.17    1.72
   0   3   5   11.60    0.64
   0   3   6    7.78    0.62
   0   3   7   27.86    1.21
   0   3   7   28.06    1.29
   0   3   7   27.24    1.17
   0   3   8   51.67    1.78
   0   3   9   60.52    1.63
   0   3   9   63.78    1.97
   0   3  10   10.47    0.73
   0   3  11    6.90    0.48
   0  -3 -11    7.14    0.55
   0  -3 -12    4.75    0.32
   0  -3 -12    4.02    0.26
   0   4 -12    3.00    0.26
   0   4 -11   23.18    0.94
   0  -4  11   21.39    0.89
   0  -4  10    2.03    0.43
   0   4 -10    1.89    0.42
   0   4  -9    0.06    0.26
   0  -4   9    0.12    0.16
   0   4  -8    5.76    0.64
   0  -4   8    5.03    0.57
   0   4  -8    6.34    0.60
   0   4  -8    6.01    0.68
   0   4  -7    2.21    0.38
   0  -4   7    1.81    0.32
   0   4  -7    2.48    0.45
   0   4  -7    1.90    0.43
   0   4  -6  118.85    2.49
   0   4  -5    1.29    0.31
   0   4  -4    3.56    0.42
   0   4  -3   24.88    0.89
   0   4  -2    7.66    0.48
   0   4  -2    7.29    0.33
   0   4  -1   17.33    0.57
   0   4  -1   17.82    0.50
   0   4  -1   17.64    0.65
   0   4   0  157.54    1.78
   0   4   0  155.42    1.74
   0   4   0  158.88    1.54
   0   4   1   17.75    0.40
   0   4   1   18.27    0.59
   0   4   1   17.75    0.62
   0   4   1   18.24    0.58
   0   4   2    2.48    0.21
   0   4   2    2.52    0.26
   0   4   2    2.53    0.22
   0   4   2    2.84    0.29
   0   4   3    2.71    0.29
   0   4   3    2.68    0.26
   0   4   4   85.02    1.55
   0   4   4   82.03    1.62
   0   4   5   31.35    1.08
   0   4   6    8.65    0.66
   0   4   7    1.00    0.36
   0   4   7    1.46    0.35
   0   4   8    3.68    0.55
   0   4   9    4.82    0.57
   0   4  10    4.24    0.40
   0   4  10    3.96    0.48
   0  -4 -10    4.44    0.52
   0  -4 -11    0.11    0.11
   0   4  11   -0.15    0.13
   0  -5  11   16.34    0.68
   0   5 -11   14.81    0.65
   0   5 -10   33.29    1.20
   0  -5  10   32.52    1.16
   0   5  -9    9.54    0.79
   0   5  -9    7.08    0.63
   0   5  -9    7.26    0.69
   0  -5   9    8.24    0.67
   0  -5   8   31.27    1.27
   0   5  -8   29.30    1.30
   0   5  -8   29.86    1.16
   0   5  -8   33.60    1.50
   0  -5   7   57.19    1.62
   0   5  -7   57.52    1.93
   0   5  -7   56.83    1.51
   0   5  -6    8.23    0.59
   0   5  -6    8.20    0.73
   0   5  -5   41.16    1.47
   0   5  -4   33.41    1.23
   0   5  -3   32.27    1.13
   0   5  -3   30.43    1.10
   0   5  -2    8.35    0.56
   0   5  -1   20.29    0.79
   0   5  -1   21.11    0.61
   0   5  -1   20.43    0.70
   0   5   0  147.05    1.69
   0   5   0  144.72    1.92
   0   5   0  141.84    1.92
   0   5   1   26.91    0.80
   0   5   1   26.32    0.86
   0   5   1   25.86    0.76
   0   5   2   29.62    0.96
   0   5   2   29.51    0.87
   0   5   2   30.98    0.82
   0   5   3   24.04    0.94
   0   5   3   24.33    0.87
   0   5   4  132.46    2.19
   0   5   4  124.58    2.30
   0   5   5   56.51    1.62
   0   5   6    2.08    0.33
   0   5   6    2.59    0.47
   0   5   7   26.10    1.31
   0   5   8    0.02    0.25
   0   5   9    8.31    0.72
   0  -5  -9    6.75    0.61
   0   5  10   35.31    1.16
   0  -5 -10   34.12    1.10
   0   5  10   35.92    1.01
   0  -5 -11    0.07    0.06
   0  -6  11    0.20    0.11
   0   6 -11    0.70    0.18
   0   6 -10   20.63    0.80
   0  -6  10   21.38    0.81
   0  -6   9    3.40    0.39
   0   6  -9    3.44    0.44
   0   6  -9    3.27    0.43
   0  -6   8   17.44    0.91
   0   6  -8   17.06    0.88
   0   6  -8   15.48    0.94
   0  -6   7   65.80    1.71
   0   6  -7   66.83    2.11
   0   6  -7   65.07    1.64
   0   6  -6    2.07    0.38
   0   6  -6    1.79    0.41
   0   6  -6    2.01    0.39
   0   6  -6    1.35    0.43
   0   6  -5   17.63    0.84
   0   6  -5   17.27    1.04
   0   6  -5   17.24    1.02
   0   6  -4   88.93    2.18
   0   6  -3   57.46    1.64
   0   6  -2  331.93    3.72
   0   6  -1    1.81    0.29
   0   6  -1    1.90    0.26
   0   6   0  208.89    2.54
   0   6   0  209.86    2.63
   0   6   1    0.73    0.18
   0   6   1    0.45    0.18
   0   6   1    0.58    0.20
   0   6   2   17.75    0.67
   0   6   2   17.31    0.82
   0   6   2   17.20    0.72
   0   6   3   12.33    0.67
   0   6   3   12.00    0.72
   0   6   4    1.44    0.34
   0   6   4    1.31    0.25
   0   6   5   21.92    1.06
   0   6   5   25.49    1.23
   0   6   6    1.60    0.46
   0   6   7    7.70    0.73
   0   6   8   12.46    0.88
   0  -6  -8   10.31    0.68
   0  -6  -9   -0.09    0.13
   0   6   9    0.06    0.20
   0   6   9    0.36    0.24
   0   6  10   18.04    0.72
   0   6  10   19.56    0.65
   0   7 -10    6.22    0.47
   0   7  -9    0.31    0.19
   0   7  -8   12.02    0.70
   0   7  -7   47.63    1.39
   0   7  -6    7.80    0.62
   0   7  -5    3.16    0.45
   0   7  -4   36.10    1.20
   0   7  -4   36.11    1.44
   0   7  -4   38.25    1.05
   0   7  -3    7.75    0.59
   0   7  -3    8.42    0.60
   0   7  -3    7.49    0.63
   0   7  -3    8.85    0.69
   0   7  -2   81.46    1.98
   0   7  -1   50.68    1.48
   0   7   0   12.31    0.69
   0   7   0   12.49    0.69
   0   7   1   18.85    0.86
   0   7   1   19.50    0.81
   0   7   2    0.22    0.14
   0   7   2    0.41    0.24
   0   7   2    0.45    0.23
   0   7   2    0.34    0.26
   0   7   3   56.68    1.71
   0   7   3   59.16    1.65
   0   7   4    8.18    0.71
   0   7   4   10.15    0.70
   0   7   5   19.02    1.07
   0   7   5   18.90    0.98
   0   7   6    0.12    0.21
   0   7   6    0.24    0.26
   0   7   7    0.66    0.17
   0   7   7    1.22    0.34
   0   7   8    7.38    0.59
   0   7   8    7.62    0.62
   0   7   9    7.62    0.47
   0   7   9    6.66    0.42
   0   8 -10    2.37    0.24
   0   8  -9    6.90    0.51
   0   8  -8   -0.01    0.17
   0   8  -8   -0.11    0.21
   0   8  -7   44.57    1.25
   0   8  -7   43.95    1.55
   0   8  -6   50.30    1.72
   0   8  -6   54.48    1.45
   0   8  -5    8.58    0.63
   0   8  -5    8.45    0.73
   0   8  -4    7.30    0.60
   0   8  -4    8.15    0.53
   0   8  -4    7.03    0.65
   0   8  -3    2.02    0.39
   0   8  -3    1.78    0.31
   0   8  -3    1.80    0.37
   0   8  -2   11.75    0.74
   0   8  -2   12.56    0.82
   0   8  -2   13.43    0.74
   0   8  -2   13.35    0.79
   0   8  -2   12.83    0.77
   0   8  -1   51.64    1.54
   0   8  -1   49.62    1.48
   0   8  -1   47.53    1.46
   0   8   0    9.15    0.66
   0   8   0    8.34    0.67
   0   8   0    9.16    0.61
   0   8   1   30.60    1.20
   0   8   1   30.76    1.24
   0   8   1   30.20    1.12
   0   8   2   51.27    1.56
   0   8   2   48.66    1.59
   0   8   3   25.02    1.12
   0   8   3   22.34    1.13
   0   8   3   23.72    1.06
   0   8   4   50.85    1.59
   0   8   4   48.82    1.62
   0   8   5   -0.11    0.17
   0   8   5    0.25    0.15
   0   8   5   -0.30    0.30
   0   8   5   -0.11    0.13
   0   8   6    0.90    0.28
   0   8   6    1.06    0.28
   0   8   6    0.77    0.24
   0   8   6    1.07    0.26
   0   8   7    2.01    0.32
   0   8   7    2.51    0.37
   0   8   8    5.22    0.36
   0   8   8    6.43    0.45
   0   9  -9    0.42    0.12
   0   9  -8    4.01    0.31
   0   9  -8    5.28    0.42
   0   9  -7    8.73    0.49
   0   9  -7    8.93    0.61
   0   9  -6    8.77    0.54
   0   9  -6    7.93    0.62
   0   9  -5   13.91    0.72
   0   9  -5   13.76    0.83
   0   9  -4    0.77    0.32
   0   9  -4    0.51    0.26
   0   9  -4    0.24    0.19
   0   9  -3    0.38    0.22
   0   9  -3    0.21    0.24
   0   9  -3    0.25    0.28
   0   9  -2   22.10    0.99
   0   9  -2   24.07    0.98
   0   9  -2   24.89    1.07
   0   9  -1    8.87    0.68
   0   9  -1    9.94    0.70
   0   9  -1    9.16    0.65
   0   9   0    5.77    0.58
   0   9   0    6.38    0.56
   0   9   1    9.80    0.72
   0   9   1    9.78    0.69
   0   9   2    0.74    0.29
   0   9   2    0.46    0.21
   0   9   3    1.92    0.33
   0   9   3    2.39    0.38
   0   9   4   21.93    0.97
   0   9   4   21.25    0.93
   0   9   5    4.57    0.38
   0   9   5    3.82    0.42
   0   9   5    4.32    0.45
   0   9   6    2.66    0.35
   0   9   6    2.22    0.27
   0   9   7   17.76    0.52
   0   9   7   21.51    0.71
   0  10  -7    1.34    0.19
   0  10  -7    1.29    0.15
   0  10  -6   12.34    0.49
   0  10  -6   11.68    0.56
   0  10  -5    2.37    0.30
   0  10  -5    2.28    0.26
   0  10  -4    0.14    0.14
   0  10  -4    0.37    0.21
   0  10  -4    0.30    0.19
   0  10  -3   48.73    1.23
   0  10  -3   51.22    1.17
   0  10  -2    3.74    0.37
   0  10  -2    2.18    0.34
   0  10  -1    8.50    0.57
   0  10  -1    9.17    0.59
   0  10   0    0.25    0.22
   0  10   0    0.44    0.23
   0  10   0    0.71    0.23
   0  10   1    3.13    0.36
   0  10   1    2.85    0.39
   0  10   1    3.88    0.41
   0  10   2    8.32    0.55
   0  10   2    7.21    0.51
   0  10   3    4.80    0.40
   0  10   3    5.22    0.41
   0  10   4    9.80    0.51
   0  10   4   10.93    0.50
   0  10   5    1.02    0.15
   0  10   6   -0.03    0.08
   0  11  -5    4.96    0.26
   0  11  -4    4.82    0.27
   0  11  -4    5.16    0.33
   0  11  -3   35.75    0.76
   0  11  -2   17.70    0.58
   0  11  -2   19.61    0.62
   0  11  -1    0.07    0.19
   0  11  -1    0.59    0.16
   0  11   0    8.25    0.43
   0  11   0    8.89    0.48
   0  11   1    1.42    0.20
   0  11   1    1.24    0.21
   0  11   2   32.82    0.88
   0  11   3   12.79    0.51
   0  11   4    2.73    0.22
  -1  12   1    0.14    0.08
  -1  12   0    8.96    0.32
  -1  12  -1    2.26    0.18
  -1  12  -2   11.12    0.35
  -1  11   4   11.46    0.42
  -1  11   4   11.25    0.45
  -1  11   3    2.07    0.23
  -1  11   3    2.03    0.26
  -1  11   2   17.14    0.67
  -1  11   2   16.43    0.66
  -1  11   1   10.87    0.57
  -1  11   1    9.94    0.53
  -1  11   0    6.57    0.44
  -1  11  -1   30.38    0.87
  -1  11  -2    0.24    0.16
  -1  11  -3   14.17    0.49
  -1  11  -3   17.16    0.62
  -1  11  -4    3.04    0.26
  -1  11  -4    2.00    0.20
  -1  11  -5    8.48    0.32
  -1  10   6    5.13    0.29
  -1  10   6    4.86    0.31
  -1  10   5    5.23    0.38
  -1  10   4   40.01    1.13
  -1  10   3    5.30    0.48
  -1  10   2   26.68    1.05
  -1  10   2   30.76    1.12
  -1  10   1    0.86    0.31
  -1  10   1    0.74    0.29
  -1  10   0    0.21    0.22
  -1  10   0   -0.05    0.20
  -1  10  -1   23.39    1.00
  -1  10  -1   22.84    0.92
  -1  10  -2    2.59    0.34
  -1  10  -2    3.48    0.38
  -1  10  -3    5.24    0.42
  -1  10  -4   19.23    0.85
  -1  10  -5    0.89    0.19
  -1  10  -5    0.83    0.25
  -1  10  -6   19.30    0.73
  -1  10  -6   23.04    0.58
  -1  10  -7    7.72    0.39
  -1   9   8    1.17    0.19
  -1   9   7    0.57    0.12
  -1   9   7    0.38    0.17
  -1   9   6   12.17    0.65
  -1   9   6   13.94    0.71
  -1   9   5    0.79    0.27
  -1   9   5    1.14    0.24
  -1   9   5    1.06    0.28
  -1   9   4   24.64    0.99
  -1   9   4   27.29    1.14
  -1   9   4   25.45    1.01
  -1   9   3    0.65    0.26
  -1   9   3    1.07    0.26
  -1   9   2   16.26    0.84
  -1   9   2   19.41    0.91
  -1   9   2   18.91    0.97
  -1   9   1    2.16    0.38
  -1   9   1    1.15    0.36
  -1   9   1    2.50    0.39
  -1   9   0    2.91    0.43
  -1   9   0    2.67    0.41
  -1   9   0    3.22    0.44
  -1   9   0    3.15    0.41
  -1   9  -1   40.70    1.22
  -1   9  -1   43.88    1.38
  -1   9  -1   41.93    1.40
  -1   9  -2    2.58    0.44
  -1   9  -2    3.04    0.41
  -1   9  -2    3.03    0.41
  -1   9  -2    2.62    0.42
  -1   9  -3    4.20    0.42
  -1   9  -3    3.91    0.52
  -1   9  -3    4.05    0.41
  -1   9  -4    0.70    0.22
  -1   9  -4    1.12    0.23
  -1   9  -4    0.50    0.28
  -1   9  -5    1.01    0.34
  -1   9  -5    1.02    0.21
  -1   9  -5    1.02    0.26
  -1   9  -6    5.32    0.37
  -1   9  -6    5.28    0.54
  -1   9  -6    4.56    0.37
  -1   9  -7   24.16    0.95
  -1   9  -7   17.07    0.58
  -1   9  -8    1.90    0.28
  -1   8   9    5.57    0.38
  -1   8   8    0.26    0.15
  -1   8   8    0.43    0.20
  -1   8   8    0.16    0.16
  -1   8   8    0.41    0.14
  -1   8   7    1.78    0.28
  -1   8   7    1.58    0.30
  -1   8   7    2.25    0.35
  -1   8   6   21.92    0.99
  -1   8   6   24.82    1.06
  -1   8   6   24.50    1.12
  -1   8   5    0.47    0.23
  -1   8   5    0.39    0.22
  -1   8   4    3.05    0.44
  -1   8   4    2.32    0.36
  -1   8   4    3.41    0.49
  -1   8   3   24.73    1.16
  -1   8   3   21.63    1.01
  -1   8   3   24.78    1.07
  -1   8   3   24.35    1.17
  -1   8   2    3.56    0.46
  -1   8   2    3.83    0.41
  -1   8   2    3.58    0.47
  -1   8   2    3.43    0.43
  -1   8   2    3.89    0.48
  -1   8   1   59.40    1.57
  -1   8   1   58.57    1.52
  -1   8   1   60.90    1.62
  -1   8   1   59.97    1.70
  -1   8   1   55.13    1.51
  -1   8   1   61.08    1.64
  -1   8   0   61.71    1.57
  -1   8   0   55.67    1.47
  -1   8   0   59.99    1.63
  -1   8   0   59.87    1.67
  -1   8  -1   37.68    1.19
  -1   8  -1   40.78    1.30
  -1   8  -1   41.37    1.44
  -1   8  -1   42.42    1.37
  -1   8  -1   40.15    1.36
  -1   8  -2   12.73    0.83
  -1   8  -2   13.06    0.73
  -1   8  -2   14.60    0.83
  -1   8  -2   14.47    0.78
  -1   8  -3    0.52    0.32
  -1   8  -3    0.77    0.23
  -1   8  -3    0.39    0.31
  -1   8  -4    5.52    0.66
  -1   8  -4    5.42    0.47
  -1   8  -4    5.07    0.57
  -1   8  -4    5.18    0.50
  -1   8  -5    6.36    0.58
  -1   8  -5    7.03    0.54
  -1   8  -5    6.32    0.70
  -1   8  -6    6.26    0.66
  -1   8  -6    5.54    0.49
  -1   8  -6    6.04    0.45
  -1   8  -6    5.76    0.54
  -1   8  -7   29.52    1.03
  -1   8  -7   32.21    1.30
  -1   8  -8    0.37    0.14
  -1   8  -8    0.51    0.27
  -1   8  -9    3.76    0.35
  -1   7  10   13.79    0.54
  -1   7  10   14.05    0.56
  -1   7   9    5.59    0.40
  -1   7   9    4.53    0.36
  -1   7   9    6.04    0.50
  -1   7   9    7.03    0.53
  -1   7   8    4.01    0.49
  -1   7   7    0.83    0.31
  -1   7   6   23.96    1.16
  -1   7   5    5.27    0.58
  -1   7   5    4.68    0.55
  -1   7   4    3.41    0.43
  -1   7   4    2.61    0.42
  -1   7   4    3.75    0.47
  -1   7   4    3.73    0.49
  -1   7   3   23.68    1.11
  -1   7   3   24.03    1.10
  -1   7   3   23.75    1.02
  -1   7   3   23.87    1.07
  -1   7   2    2.30    0.32
  -1   7   2    2.72    0.37
  -1   7   1   16.73    0.80
  -1   7   1   17.70    0.85
  -1   7   0   69.87    1.71
  -1   7   0   68.81    1.63
  -1   7  -1    6.19    0.59
  -1   7  -2   71.88    1.90
  -1   7  -3   46.64    1.62
  -1   7  -3   48.70    1.36
  -1   7  -3   48.20    1.24
  -1   7  -3   44.09    1.52
  -1   7  -3   42.83    1.21
  -1   7  -4   63.58    1.71
  -1   7  -4   66.85    1.97
  -1   7  -4   63.00    1.51
  -1   7  -5   46.12    1.54
  -1   7  -5   46.46    1.32
  -1   7  -6    7.37    0.68
  -1   7  -6    8.22    0.59
  -1   7  -6    8.23    0.53
  -1   7  -7   13.35    0.86
  -1   7  -7   14.46    0.75
  -1   7  -8    0.71    0.23
  -1   7  -8    0.14    0.20
  -1   7  -9    0.74    0.20
  -1   7  -9    0.71    0.26
  -1   7 -10    6.77    0.40
  -1   6  11    0.09    0.09
  -1   6  10   20.47    0.88
  -1   6  10   20.19    0.80
   1  -6 -10   19.48    0.70
   1  -6  -9    5.19    0.46
  -1   6   9    5.29    0.57
  -1   6   8    0.50    0.29
  -1   6   7   11.46    0.87
  -1   6   6   10.47    0.75
  -1   6   6    9.32    0.80
  -1   6   5   38.14    1.42
  -1   6   5   41.03    1.32
  -1   6   5   38.31    1.46
  -1   6   5   40.56    1.40
  -1   6   4   52.25    1.56
  -1   6   3    9.10    0.64
  -1   6   2   17.61    0.83
  -1   6   2   19.36    0.76
  -1   6   1    2.52    0.32
  -1   6   1    2.41    0.33
  -1   6   0   54.78    1.40
  -1   6   0   53.56    1.31
  -1   6  -1  101.07    1.80
  -1   6  -1  102.35    1.99
  -1   6  -2    9.55    0.67
  -1   6  -3   72.30    1.87
  -1   6  -4    0.20    0.31
  -1   6  -4    0.71    0.25
  -1   6  -5   28.51    1.39
  -1   6  -5   30.09    1.32
  -1   6  -5   29.60    1.04
  -1   6  -5   27.48    1.21
  -1   6  -6   14.52    0.78
  -1   6  -6   15.15    1.04
  -1   6  -6   14.77    0.94
  -1   6  -7   13.74    0.93
  -1   6  -7   16.08    1.10
  -1   6  -7   14.15    0.78
   1  -6   8   17.01    0.84
  -1   6  -8   18.07    1.12
  -1   6  -8   15.81    0.96
  -1   6  -9    1.48    0.32
   1  -6   9    1.23    0.28
  -1   6 -10   26.64    0.92
  -1   6 -10   28.63    0.91
   1  -6  10   27.29    0.76
   1  -5 -11    7.18    0.45
  -1   5  11    8.13    0.50
  -1   5  11    8.03    0.42
  -1   5  10    1.75    0.37
   1  -5 -10    2.29    0.34
  -1   5   9   21.32    1.15
  -1   5   8   26.85    1.34
  -1   5   7   15.90    1.01
  -1   5   7   16.77    1.06
  -1   5   7   15.89    0.83
  -1   5   6   20.92    1.09
  -1   5   6   19.76    1.08
  -1   5   6   19.87    0.95
  -1   5   5   12.52    0.77
  -1   5   4   70.70    1.70
  -1   5   3    7.56    0.52
  -1   5   3    7.63    0.45
  -1   5   2    9.88    0.57
  -1   5   2   10.58    0.46
  -1   5   2   10.95    0.52
  -1   5   1   19.78    0.73
  -1   5   1   19.29    0.54
  -1   5   1   20.52    0.78
  -1   5   0    4.33    0.37
  -1   5   0    4.45    0.36
  -1   5  -1   81.37    1.61
  -1   5  -1   77.74    1.40
  -1   5  -2   66.21    1.53
  -1   5  -3   13.23    0.78
  -1   5  -3   13.35    0.75
  -1   5  -4   15.34    0.90
  -1   5  -4   15.52    0.86
  -1   5  -5   45.35    1.62
  -1   5  -5   45.71    1.54
  -1   5  -6   73.28    2.19
  -1   5  -6   78.33    1.67
  -1   5  -6   77.15    2.05
  -1   5  -6   74.95    2.03
  -1   5  -7    3.09    0.54
   1  -5   7    3.36    0.41
  -1   5  -7    2.82    0.52
  -1   5  -7    2.93    0.44
   1  -5   8   79.31    1.95
  -1   5  -8   80.12    2.34
  -1   5  -8   73.02    2.12
   1  -5   9    1.31    0.32
  -1   5  -9    1.45    0.40
  -1   5 -10    8.81    0.62
   1  -5  10    8.65    0.56
  -1   5 -11   22.65    0.72
  -1   5 -11   17.13    0.56
   1  -4 -12    6.58    0.38
  -1   4  12    6.29    0.35
  -1   4  11    0.40    0.14
  -1   4  11    0.24    0.19
  -1   4  10   17.30    0.98
  -1   4   9   54.47    1.87
  -1   4   8    0.34    0.27
  -1   4   8   -0.01    0.08
  -1   4   7   77.53    1.91
  -1   4   7   81.17    2.11
  -1   4   7   82.16    2.21
  -1   4   6   54.17    1.47
  -1   4   5   69.00    1.49
  -1   4   4  186.90    2.11
  -1   4   3    3.90    0.26
  -1   4   3    3.75    0.35
  -1   4   3    3.95    0.31
  -1   4   2   18.29    0.55
  -1   4   2   17.69    0.42
  -1   4   2   18.08    0.67
  -1   4   2   17.25    0.58
  -1   4   1   61.08    0.85
  -1   4   1   62.35    1.18
  -1   4   1   64.05    1.15
  -1   4   0   18.74    0.65
  -1   4   0   18.28    0.61
  -1   4   0   18.55    0.39
  -1   4  -1   96.51    1.38
  -1   4  -1   96.79    1.54
  -1   4  -2    1.37    0.27
  -1   4  -2    1.19    0.23
  -1   4  -3    9.67    0.61
  -1   4  -4   71.09    1.72
  -1   4  -5    1.55    0.37
  -1   4  -6   22.28    1.14
  -1   4  -7    0.50    0.31
   1  -4   7    0.58    0.19
  -1   4  -8   20.38    1.21
  -1   4  -8   19.00    1.15
   1  -4   8   19.86    1.05
  -1   4  -9    0.68    0.34
   1  -4   9    0.17    0.27
  -1   4  -9    0.59    0.29
   1  -4  10    0.72    0.28
  -1   4 -10    0.70    0.33
  -1   4 -11   25.14    0.89
   1  -4  11   24.44    0.83
  -1   3  12    3.49    0.30
   1  -3 -12    3.54    0.36
  -1   3  11   19.13    0.92
  -1   3  10    4.18    0.54
  -1   3   9   66.62    2.07
  -1   3   8   16.43    0.94
  -1   3   8   15.34    0.95
  -1   3   8   16.86    1.03
  -1   3   7    0.93    0.26
  -1   3   6  122.87    2.20
  -1   3   5    4.97    0.42
  -1   3   4   77.09    1.34
  -1   3   3   38.96    0.80
  -1   3   2  135.75    1.39
  -1   3   2  137.74    1.38
  -1   3   2  139.13    1.20
  -1   3   1  173.78    0.83
  -1   3   1  177.96    1.66
  -1   3   1  176.26    1.25
  -1   3   0  132.43    0.81
  -1   3   0  134.04    1.41
  -1   3  -1   79.09    1.07
  -1   3  -1   81.16    1.23
  -1   3  -1   80.47    1.25
  -1   3  -2    0.30    0.19
   1  -3   2    0.04    0.07
  -1   3  -3   76.17    1.47
   1  -3   3   77.36    1.12
   1  -3   4   40.63    0.98
  -1   3  -4   40.61    1.22
   1  -3   5  130.40    2.01
   1  -3   6    2.54    0.36
  -1   3  -7    9.13    0.78
  -1   3  -7    7.44    0.61
   1  -3   7    8.15    0.64
   1  -3   7    9.46    0.70
  -1   3  -7    7.41    0.74
  -1   3  -8    3.65    0.58
  -1   3  -8    2.96    0.53
   1  -3   8    3.86    0.47
  -1   3  -9    5.32    0.67
  -1   3  -9    5.71    0.66
   1  -3   9    5.24    0.58
   1  -3  10   13.15    0.82
  -1   3 -10   14.68    0.92
  -1   3 -11    3.70    0.43
   1  -3  11    2.85    0.35
  -1   3 -12    1.12    0.17
   1  -3  12    1.11    0.15
  -1   2  12    2.79    0.29
  -1   2  11   13.96    0.79
  -1   2  11   13.94    0.69
  -1   2  10   23.10    1.16
  -1   2  10   21.95    1.00
  -1   2   9   39.62    1.37
  -1   2   9   40.97    1.58
  -1   2   9   39.12    1.35
  -1   2   8   18.27    0.93
  -1   2   8   18.82    1.03
  -1   2   8   19.15    1.05
  -1   2   7    1.36    0.33
  -1   2   6   52.54    1.42
  -1   2   5   29.85    0.95
  -1   2   4    2.54    0.27
  -1   2   3  262.97    2.06
  -1   2   2   25.46    0.52
  -1   2   1  266.50    1.16
  -1   2   1  268.35    1.28
  -1   2   0  239.83    0.68
  -1   2  -1  345.27    2.13
   1  -2   2  141.86    1.28
  -1   2  -2  148.18    1.56
   1  -2   3    1.80    0.21
   1  -2   4   83.13    1.43
   1  -2   5   43.88    1.20
   1  -2   6    4.17    0.45
   1  -2   7    9.81    0.71
   1  -2   8    9.06    0.74
   1  -2   8    8.74    0.76
  -1   2  -9    2.21    0.48
   1  -2   9    2.26    0.42
  -1   2  -9    2.75    0.49
   1  -2  10   24.37    1.13
  -1   2 -10   26.41    1.23
  -1   2 -11    1.66    0.33
   1  -2  11    1.87    0.34
   1  -2  12    7.83    0.40
  -1   2 -12    7.33    0.41
   1  -1 -13    6.35    0.32
   1  -1 -13    6.89    0.37
  -1   1  12    3.00    0.30
  -1   1  11   15.93    0.83
  -1   1  11   13.94    0.77
  -1   1  10   29.34    1.27
  -1   1  10   27.40    1.19
  -1   1   9   61.05    1.73
  -1   1   9   62.16    1.85
  -1   1   8    4.19    0.50
  -1   1   8    4.22    0.53
  -1   1   7    9.61    0.68
  -1   1   6   16.68    0.82
  -1   1   5  139.97    2.02
  -1   1   4    0.62    0.18
  -1   1   3    2.44    0.23
  -1   1   2  112.23    1.06
  -1   1   1  224.34    1.13
   1  -1   1   11.99    0.23
  -1   1  -2  735.35    3.24
   1  -1   3  120.06    1.51
  -1   1  -3  112.85    1.53
   1  -1   4  188.74    2.21
   1  -1   5  175.66    2.42
   1  -1   6    1.28    0.29
   1  -1   7    3.92    0.46
   1  -1   8   77.82    2.11
   1  -1   8   73.95    2.03
   1  -1   9    1.36    0.41
  -1   1 -10   54.07    1.58
  -1   1 -10   56.93    1.80
   1  -1  10   54.91    1.69
  -1   1 -11    0.90    0.23
  -1   1 -11    1.02    0.28
   1  -1  12    5.60    0.34
  -1   1 -12    6.04    0.37
   1   0 -13    0.63    0.15
  -1   0  12    9.04    0.56
  -1   0  11    0.48    0.30
  -1   0  10   15.88    0.90
  -1   0  10   14.98    0.94
  -1   0   9    0.85    0.33
  -1   0   9    1.16    0.32
  -1   0   9    0.70    0.25
  -1   0   9    0.68    0.32
  -1   0   8   26.17    1.21
  -1   0   7  152.27    2.65
  -1   0   6    5.85    0.50
  -1   0   5  224.98    2.53
  -1   0   4   90.66    1.39
  -1   0   3    2.01    0.22
  -1   0   2  174.70    1.34
  -1   0   1  301.57    1.40
   1   0   0  123.80    0.75
  -1   0   0  120.62    0.41
   1   0   1  680.08    2.23
  -1   0  -2   51.45    0.82
   1   0   2   52.77    0.77
  -1   0  -3  183.52    1.82
   1   0   3  190.05    1.74
   1   0   4  131.99    1.88
   1   0   5  131.92    2.14
   1   0   6   13.88    0.79
   1   0   7    3.48    0.46
   1   0   8  144.11    2.78
   1   0   8  147.20    2.94
   1   0   9    1.05    0.37
  -1   0 -10   15.88    0.92
   1   0  10   15.58    0.91
   1   0  11    5.35    0.47
  -1   0 -11    5.26    0.49
  -1   0 -11    4.92    0.44
  -1   0 -12    0.95    0.17
   1   0  12    0.67    0.14
  -1  -1  13    1.58    0.19
   1   1 -13    1.53    0.21
  -1  -1  12    2.08    0.33
   1   1 -12    2.22    0.37
  -1  -1  11   10.99    0.78
  -1  -1  10    8.86    0.75
  -1  -1   9   25.66    1.19
  -1  -1   9   28.97    1.33
  -1  -1   9   26.43    1.21
  -1  -1   8   15.17    0.92
  -1  -1   7   88.22    2.01
  -1  -1   6    2.84    0.35
  -1  -1   5  283.37    2.85
  -1  -1   4    6.63    0.40
  -1  -1   3    8.00    0.38
  -1  -1   2  243.31    1.63
  -1  -1   1    1.95    0.15
   1   1   0  308.16    1.60
   1   1   1    0.35    0.11
  -1  -1  -2    8.36    0.32
   1   1   2    8.60    0.36
   1   1   3   97.96    1.37
  -1  -1  -3   98.41    1.26
   1   1   4  303.31    2.74
   1   1   4  304.36    2.94
   1   1   5   80.91    1.73
   1   1   6  122.27    2.34
   1   1   7    9.76    0.77
   1   1   7    9.85    0.73
   1   1   8  102.43    2.26
   1   1   8  103.44    2.36
   1   1   9   -0.09    0.25
   1   1   9   -0.18    0.24
   1   1  10    1.66    0.34
  -1  -1 -10    1.31    0.35
  -1  -1 -11    2.62    0.35
   1   1  11    1.98    0.29
  -1  -1 -11    2.13    0.35
   1   2 -13    1.60    0.18
   1   2 -12    9.18    0.59
  -1  -2  12   10.15    0.63
   1   2 -11   25.30    1.16
  -1  -2  11   23.71    1.10
   1   2 -10    0.65    0.32
  -1  -2  10    0.71    0.36
  -1  -2   9   40.56    1.48
  -1  -2   9   36.78    1.36
   1   2  -8   21.99    0.96
  -1  -2   8   21.82    1.03
  -1  -2   8   23.70    1.14
  -1  -2   7   22.95    1.04
  -1  -2   6   67.58    1.59
  -1  -2   5   31.94    0.97
  -1  -2   4    4.03    0.33
  -1  -2   3   86.79    1.20
   1   2  -3   88.13    1.18
  -1  -2   2  155.96    1.34
  -1  -2   1   64.99    0.79
   1   2  -1   69.63    0.70
   1   2   0   46.91    0.62
   1   2   0   46.85    0.76
   1   2   0   45.38    0.60
   1   2   1  116.44    1.31
   1   2   1  112.93    0.82
   1   2   2    1.66    0.22
  -1  -2  -3   74.92    1.03
   1   2   3   77.72    1.32
   1   2   4  236.21    2.58
   1   2   4  236.06    2.67
   1   2   5   28.36    1.06
   1   2   6    7.37    0.61
   1   2   7    0.59    0.30
   1   2   7    1.28    0.34
   1   2   7    0.85    0.25
   1   2   8   10.04    0.78
   1   2   9   35.74    1.36
   1   2   9   35.52    1.37
   1   2  10    4.53    0.49
  -1  -2 -10    5.16    0.56
   1   2  10    5.58    0.48
  -1  -2 -11    9.56    0.54
   1   2  11   10.42    0.51
   1   3 -12   12.66    0.62
  -1  -3  12   12.68    0.66
   1   3 -11   50.11    1.53
  -1  -3  11   47.57    1.48
   1   3 -10    2.08    0.47
   1   3 -10    2.56    0.47
  -1  -3  10    2.63    0.42
  -1  -3   9   15.44    0.94
   1   3  -9   13.59    0.85
   1   3  -9   16.92    1.03
   1   3  -8   26.74    1.04
  -1  -3   8   27.82    1.21
  -1  -3   8   26.85    1.18
   1   3  -8   28.43    1.30
   1   3  -7    0.44    0.23
  -1  -3   7    0.13    0.12
   1   3  -6   81.91    1.83
  -1  -3   6   83.93    1.77
  -1  -3   5    2.91    0.32
   1   3  -5    3.10    0.35
   1   3  -4   41.44    1.05
  -1  -3   4   45.00    1.01
  -1  -3   3  101.55    1.28
   1   3  -3  103.28    1.48
  -1  -3   2   27.11    0.58
   1   3  -2   26.31    0.69
   1   3  -1   23.46    0.61
   1   3  -1   23.59    0.53
   1   3   0   97.04    1.30
   1   3   0   93.45    1.09
   1   3   0   97.38    1.13
   1   3   1    2.53    0.23
   1   3   1    2.90    0.27
   1   3   1    2.95    0.19
   1   3   2   37.22    0.92
   1   3   3    2.62    0.30
   1   3   4   60.26    1.40
   1   3   4   60.32    1.41
   1   3   5    0.72    0.26
   1   3   5    1.06    0.24
   1   3   6    4.94    0.53
   1   3   7    6.86    0.65
   1   3   7    7.20    0.64
   1   3   7    7.19    0.65
   1   3   8    2.99    0.51
   1   3   8    2.77    0.44
  -1  -3  -9   14.28    0.95
   1   3   9   13.57    0.71
   1   3   9   13.94    0.80
   1   3   9   14.66    0.91
  -1  -3 -10   16.44    0.89
   1   3  10   14.67    0.67
   1   3  10   14.35    0.75
  -1  -3 -11    0.63    0.20
  -1  -3 -11    0.51    0.13
  -1  -4  12   -0.02    0.12
   1   4 -12    0.02    0.13
  -1  -4  11   32.09    1.17
   1   4 -11   30.75    1.10
   1   4 -10   35.42    1.34
  -1  -4  10   33.83    1.32
   1   4  -9   16.78    0.92
   1   4  -9   19.09    1.05
  -1  -4   9   19.55    1.04
   1   4  -9   19.35    1.09
  -1  -4   8   59.95    1.75
   1   4  -8   62.15    1.61
   1   4  -8   64.56    1.97
   1   4  -7    9.87    0.76
   1   4  -6   96.20    2.10
   1   4  -5   48.78    1.38
   1   4  -4    3.46    0.37
  -1  -4   4    3.10    0.27
   1   4  -3  174.40    2.21
  -1  -4   3  174.42    1.65
   1   4  -2   59.54    1.09
   1   4  -1   53.46    0.94
   1   4  -1   51.28    1.07
   1   4   0   15.70    0.54
   1   4   0   17.18    0.62
   1   4   0   15.72    0.55
   1   4   1    9.96    0.51
   1   4   1    8.84    0.45
   1   4   1    9.27    0.38
   1   4   2    4.04    0.34
   1   4   2    3.85    0.35
   1   4   3   23.46    0.82
   1   4   3   23.86    0.88
   1   4   4   10.39    0.64
   1   4   4    9.98    0.61
   1   4   5   15.39    0.84
   1   4   5   15.40    0.82
   1   4   6    2.56    0.42
   1   4   6    2.15    0.39
   1   4   7    5.28    0.63
  -1  -4  -8    1.65    0.35
   1   4   8    1.20    0.38
   1   4   9   18.91    0.85
  -1  -4  -9   18.68    1.02
   1   4   9   18.91    1.00
  -1  -4 -10    3.51    0.41
   1   4  10    2.80    0.34
  -1  -4 -11    3.34    0.26
  -1  -5  12    2.06    0.23
   1   5 -11    0.01    0.12
  -1  -5  11    0.42    0.20
   1   5 -10    5.98    0.52
  -1  -5  10    5.79    0.55
  -1  -5   9    1.92    0.39
   1   5  -9    2.60    0.44
   1   5  -9    1.77    0.40
   1   5  -9    1.50    0.36
  -1  -5   8    8.03    0.68
   1   5  -8    8.64    0.65
   1   5  -8    8.94    0.77
   1   5  -7   32.26    1.15
  -1  -5   7   28.92    1.16
   1   5  -7   31.52    1.35
   1   5  -6    1.07    0.31
   1   5  -5    7.82    0.63
   1   5  -4   46.51    1.37
   1   5  -4   39.39    1.02
   1   5  -3   32.74    0.90
   1   5  -2  196.07    2.17
   1   5  -2  190.14    2.52
   1   5  -1    8.43    0.48
   1   5  -1    8.32    0.49
   1   5  -1    8.07    0.44
   1   5   0  264.78    2.47
   1   5   0  265.67    2.51
   1   5   1   20.23    0.78
   1   5   1   20.72    0.76
   1   5   1   21.08    0.65
   1   5   2   22.26    0.83
   1   5   2   24.05    0.89
   1   5   3   35.53    1.15
   1   5   3   36.38    1.15
   1   5   4    5.89    0.52
   1   5   4    4.85    0.45
   1   5   5   17.83    0.90
   1   5   5   21.05    1.14
   1   5   6   16.28    1.04
  -1  -5  -6   16.16    0.95
   1   5   7    3.49    0.49
  -1  -5  -7    3.80    0.49
   1   5   8   30.19    1.33
   1   5   8   30.89    1.21
  -1  -5  -8   30.81    1.28
   1   5   9    0.19    0.19
  -1  -5  -9    0.07    0.15
   1   5   9    0.04    0.20
   1   5  10    4.89    0.31
  -1  -5 -10    5.39    0.38
  -1  -6  11    0.23    0.11
  -1  -6  10    1.02    0.22
  -1  -6   9   18.94    0.92
   1   6  -9   17.42    0.88
  -1  -6   8    0.12    0.21
   1   6  -8    0.54    0.26
   1   6  -7   42.68    1.36
  -1  -6   7   42.79    1.42
   1   6  -6   16.76    1.04
   1   6  -6   19.77    0.94
   1   6  -5   16.17    0.97
   1   6  -5   17.59    0.86
   1   6  -4   10.48    0.75
   1   6  -3    3.07    0.41
   1   6  -2  134.91    2.29
   1   6  -1   21.86    0.81
   1   6  -1   22.35    0.86
   1   6  -1   22.81    0.79
   1   6   0   31.57    0.96
   1   6   0   31.35    0.96
   1   6   0   31.33    0.99
   1   6   1  100.47    1.53
   1   6   1   98.24    1.81
   1   6   2    0.10    0.08
   1   6   2   -0.02    0.08
   1   6   3   92.48    1.94
   1   6   3   94.36    1.97
   1   6   4   15.75    0.86
   1   6   4   16.30    1.00
   1   6   5   65.71    2.00
   1   6   6   20.65    1.16
   1   6   7   -0.11    0.26
  -1  -6  -7    0.33    0.25
   1   6   7    0.19    0.29
  -1  -6  -8   33.92    1.12
   1   6   8   34.60    1.20
   1   6   8   36.06    1.35
  -1  -6  -9    2.54    0.25
   1   6   9    2.97    0.32
   1   7 -11   11.80    0.50
  -1  -7  10    4.78    0.35
  -1  -7   9   26.92    0.94
   1   7  -9   28.07    1.00
   1   7  -8    6.03    0.54
  -1  -7   8    5.34    0.48
   1   7  -7   99.21    2.05
   1   7  -6   29.25    1.16
   1   7  -5   20.15    0.99
   1   7  -5   21.59    0.98
   1   7  -4   34.77    1.41
   1   7  -4   35.89    1.24
   1   7  -3   14.01    0.74
   1   7  -3   13.64    0.78
   1   7  -3   13.09    0.82
   1   7  -2   87.31    1.93
   1   7  -2   89.03    1.95
   1   7  -1    5.81    0.50
   1   7   0    2.83    0.33
   1   7   0    2.90    0.44
   1   7   1   30.08    1.23
   1   7   1   29.11    1.07
   1   7   1   28.74    1.02
   1   7   2   39.10    1.49
   1   7   2   34.94    1.25
   1   7   2   37.55    1.22
   1   7   2   41.05    1.29
   1   7   2   37.83    1.24
   1   7   3   24.62    1.12
   1   7   3   24.50    1.22
   1   7   3   23.92    1.17
   1   7   3   24.96    1.03
   1   7   4   85.52    2.14
   1   7   4   83.58    2.19
   1   7   5   29.32    1.28
   1   7   5   29.04    1.31
   1   7   6   16.07    0.94
   1   7   6   15.40    0.96
   1   7   7    1.03    0.31
   1   7   7    1.29    0.28
   1   7   8   11.66    0.62
   1   7   8   12.77    0.66
   1   7   9    0.77    0.14
   1   7   9    0.57    0.14
   1   8 -10    2.65    0.27
   1   8  -9    2.91    0.32
   1   8  -9    2.97    0.36
   1   8  -8    3.92    0.47
   1   8  -8    3.93    0.40
   1   8  -7    5.99    0.50
   1   8  -7    4.63    0.52
   1   8  -6   29.15    1.13
   1   8  -6   22.22    1.13
   1   8  -5    2.86    0.43
   1   8  -5    2.34    0.42
   1   8  -4    8.73    0.68
   1   8  -4    7.99    0.68
   1   8  -3    6.70    0.50
   1   8  -3    6.62    0.58
   1   8  -2   25.23    1.05
   1   8  -2   23.01    1.08
   1   8  -1    1.44    0.42
   1   8  -1    2.04    0.32
   1   8   0   -0.03    0.13
   1   8   0    0.62    0.32
   1   8   1    4.55    0.56
   1   8   1    5.25    0.52
   1   8   2   23.12    1.17
   1   8   2   23.10    1.05
   1   8   2   26.26    1.05
   1   8   3    2.10    0.45
   1   8   3    2.57    0.40
   1   8   3    2.01    0.42
   1   8   4    6.89    0.65
   1   8   4    6.03    0.62
   1   8   5    0.35    0.27
   1   8   5    0.01    0.27
   1   8   6   -0.12    0.21
   1   8   6    0.20    0.17
   1   8   7   11.95    0.61
   1   8   7   12.84    0.66
   1   8   8    1.36    0.17
   1   8   8    1.64    0.21
   1   9  -9    0.24    0.12
   1   9  -8    2.98    0.33
   1   9  -8    2.92    0.29
   1   9  -7    2.63    0.32
   1   9  -7    2.28    0.33
   1   9  -6   36.30    1.18
   1   9  -6   41.03    1.19
   1   9  -5    2.10    0.37
   1   9  -5    2.29    0.37
   1   9  -4   25.99    1.07
   1   9  -3   40.06    1.12
   1   9  -3   38.93    1.33
   1   9  -2    7.99    0.58
   1   9  -2    7.17    0.64
   1   9  -1   34.25    1.19
   1   9  -1   30.99    1.24
   1   9   0    7.31    0.67
   1   9   0    8.04    0.58
   1   9   1   23.94    0.97
   1   9   1   23.34    1.12
   1   9   2   29.80    1.02
   1   9   2   28.57    1.21
   1   9   3    7.13    0.48
   1   9   3    7.06    0.65
   1   9   4    0.78    0.22
   1   9   4    0.84    0.27
   1   9   5    1.18    0.28
   1   9   5    1.69    0.30
   1   9   6    1.07    0.23
   1   9   6    0.88    0.20
   1  10  -7    0.54    0.13
   1  10  -6    0.16    0.11
   1  10  -6    0.27    0.15
   1  10  -5    2.58    0.33
   1  10  -4    6.29    0.48
   1  10  -3   20.92    0.69
   1  10  -3   22.31    0.90
   1  10  -2    5.39    0.40
   1  10  -2    5.67    0.50
   1  10  -1    4.17    0.40
   1  10  -1    4.48    0.46
   1  10   0    0.80    0.21
   1  10   0    1.00    0.29
   1  10   1    5.14    0.41
   1  10   1    4.78    0.46
   1  10   2   20.82    0.70
   1  10   2   19.03    0.83
   1  10   3    0.96    0.23
   1  10   4    2.28    0.27
   1  10   5    7.88    0.33
   1  11  -5    0.28    0.10
   1  11  -5   -0.22    0.11
   1  11  -4   13.95    0.48
   1  11  -3    2.05    0.23
   1  11  -2   14.99    0.58
   1  11  -2   13.18    0.44
   1  11  -1    1.64    0.24
   1  11  -1    1.73    0.18
   1  11   0    0.42    0.17
   1  11   0    0.45    0.15
   1  11   1    5.35    0.34
   1  11   1    6.64    0.36
   1  11   2    1.20    0.16
   1  11   2    0.58    0.13
   1  11   3    1.05    0.15
  -2  12   2    5.97    0.27
  -2  12   1    1.51    0.16
  -2  12   0    0.73    0.13
  -2  12  -1   10.63    0.34
  -2  11   5    8.20    0.34
  -2  11   5    9.03    0.33
  -2  11   4   12.43    0.51
  -2  11   4   14.98    0.53
  -2  11   3    3.57    0.32
  -2  11   3    3.19    0.32
  -2  11   2   10.54    0.54
  -2  11   2    8.89    0.37
  -2  11   2   10.24    0.55
  -2  11   1    4.59    0.40
  -2  11   1    3.99    0.36
  -2  11   1    3.60    0.31
  -2  11   0    0.46    0.20
  -2  11   0    0.29    0.18
  -2  11   0    0.70    0.18
  -2  11  -1    7.72    0.47
  -2  11  -1    8.66    0.49
  -2  11  -1    7.64    0.41
  -2  11  -2    4.70    0.36
  -2  11  -2    4.66    0.34
  -2  11  -2    5.24    0.38
  -2  11  -3    0.80    0.20
  -2  11  -3    0.66    0.18
  -2  11  -4   13.32    0.49
  -2  11  -4   20.18    0.56
  -2  10   7   -0.02    0.06
  -2  10   6   10.33    0.51
  -2  10   6   10.88    0.46
  -2  10   5    0.34    0.16
  -2  10   5    0.00    0.16
  -2  10   4   16.37    0.75
  -2  10   4   15.54    0.78
  -2  10   3   17.38    0.86
  -2  10   3   17.52    0.82
  -2  10   2    9.01    0.64
  -2  10   2    9.56    0.60
  -2  10   2    9.59    0.66
  -2  10   1   15.27    0.69
  -2  10   1   15.13    0.73
  -2  10   1   16.81    0.83
  -2  10   0    6.10    0.51
  -2  10   0    6.20    0.54
  -2  10   0    5.89    0.48
  -2  10  -1   39.46    1.19
  -2  10  -1   35.72    1.15
  -2  10  -2    3.04    0.38
  -2  10  -3    1.10    0.24
  -2  10  -3    1.17    0.28
  -2  10  -4    5.50    0.41
  -2  10  -4    5.56    0.51
  -2  10  -5    0.67    0.19
  -2  10  -5    0.49    0.22
  -2  10  -6   18.01    0.67
  -2   9   8    1.37    0.19
  -2   9   8    1.80    0.23
  -2   9   7    1.03    0.21
  -2   9   7    1.21    0.25
  -2   9   6    9.41    0.60
  -2   9   6    8.27    0.61
  -2   9   5    0.41    0.25
  -2   9   4   19.71    0.97
  -2   9   4   17.90    0.99
  -2   9   3    5.47    0.46
  -2   9   3    5.11    0.56
  -2   9   3    5.19    0.53
  -2   9   3    5.26    0.57
  -2   9   2    7.93    0.56
  -2   9   2    9.29    0.66
  -2   9   2    8.61    0.69
  -2   9   2    7.77    0.64
  -2   9   1   21.76    0.93
  -2   9   1   22.43    1.02
  -2   9   1   21.09    0.98
  -2   9   1   23.31    1.10
  -2   9   0    6.17    0.55
  -2   9   0    7.01    0.62
  -2   9   0    7.93    0.64
  -2   9   0    6.98    0.60
  -2   9  -1   85.28    1.88
  -2   9  -1   84.36    1.92
  -2   9  -1   84.56    2.03
  -2   9  -1   82.75    1.93
  -2   9  -2   59.17    1.75
  -2   9  -2   59.29    1.52
  -2   9  -2   56.30    1.57
  -2   9  -3    7.24    0.55
  -2   9  -3    6.93    0.66
  -2   9  -3    6.32    0.58
  -2   9  -4   17.75    0.88
  -2   9  -4   20.44    0.84
  -2   9  -4   20.03    1.05
  -2   9  -5    5.58    0.49
  -2   9  -5    5.64    0.58
  -2   9  -6   12.19    0.73
  -2   9  -6   10.52    0.58
  -2   9  -6   12.39    0.51
  -2   9  -7    5.19    0.34
  -2   9  -7    5.84    0.45
  -2   9  -8    3.03    0.25
  -2   8   9    0.42    0.18
  -2   8   9    0.19    0.13
  -2   8   9    0.16    0.14
  -2   8   8    4.57    0.43
  -2   8   8    5.58    0.45
  -2   8   7    0.28    0.18
  -2   8   7   -0.08    0.18
  -2   8   6   27.56    1.21
  -2   8   6   21.74    1.11
  -2   8   5    8.34    0.73
  -2   8   5   10.27    0.74
  -2   8   5    9.47    0.77
  -2   8   4    9.02    0.74
  -2   8   4    8.79    0.77
  -2   8   4    8.90    0.70
  -2   8   3    0.26    0.27
  -2   8   3    0.26    0.22
  -2   8   3    0.65    0.29
  -2   8   3    0.04    0.27
  -2   8   2    6.00    0.52
  -2   8   2    5.93    0.59
  -2   8   2    5.70    0.52
  -2   8   2    5.11    0.57
  -2   8   2    5.67    0.59
  -2   8   1    1.64    0.34
  -2   8   1    0.55    0.28
  -2   8   1    1.23    0.40
  -2   8   1    1.33    0.26
  -2   8   1    1.33    0.28
  -2   8   1    1.48    0.32
  -2   8   0    6.52    0.57
  -2   8   0    6.49    0.60
  -2   8   0    5.39    0.56
  -2   8   0    6.52    0.64
  -2   8   0    6.07    0.57
  -2   8   0    6.35    0.55
  -2   8  -1    3.40    0.43
  -2   8  -1    3.10    0.45
  -2   8  -1    3.31    0.46
  -2   8  -1    3.72    0.43
  -2   8  -1    3.79    0.53
  -2   8  -2   37.22    1.20
  -2   8  -2   36.23    1.34
  -2   8  -2   38.54    1.28
  -2   8  -2   37.37    1.44
  -2   8  -3    4.69    0.48
  -2   8  -3    4.00    0.53
  -2   8  -3    4.67    0.59
  -2   8  -4   13.81    0.75
  -2   8  -4   13.54    0.88
  -2   8  -4   13.71    0.96
  -2   8  -5    6.68    0.62
  -2   8  -5    7.22    0.52
  -2   8  -5    6.91    0.71
  -2   8  -6    9.06    0.69
  -2   8  -6    9.69    0.53
  -2   8  -6    9.89    0.78
  -2   8  -7   32.46    1.22
  -2   8  -7   30.61    1.07
  -2   8  -8    1.39    0.26
  -2   8  -8    1.06    0.22
  -2   8  -9    1.48    0.17
  -2   7  10   19.74    0.74
  -2   7  10   12.86    0.53
  -2   7   9    6.65    0.54
  -2   7   8   10.32    0.77
  -2   7   7    9.18    0.70
  -2   7   7    7.73    0.70
  -2   7   6   14.98    0.88
  -2   7   6   16.17    0.95
  -2   7   5   53.13    1.71
  -2   7   5   54.06    1.60
  -2   7   4   47.59    1.60
  -2   7   4   47.56    1.49
  -2   7   4   44.48    1.19
  -2   7   4   42.65    1.49
  -2   7   3    4.45    0.52
  -2   7   3    4.68    0.55
  -2   7   3    4.22    0.49
  -2   7   2   73.39    1.65
  -2   7   2   75.06    1.83
  -2   7   1   12.05    0.73
  -2   7   1   12.10    0.72
  -2   7   0   85.18    1.92
  -2   7   0   83.44    1.82
  -2   7  -1   16.89    0.92
  -2   7  -2   15.53    0.74
  -2   7  -2   14.06    0.82
  -2   7  -2   13.96    0.89
  -2   7  -2   14.39    0.86
  -2   7  -2   15.17    0.77
  -2   7  -3   12.00    0.66
  -2   7  -3   10.67    0.77
  -2   7  -3   11.75    0.80
  -2   7  -3   11.15    0.83
  -2   7  -4   23.03    1.13
  -2   7  -4   23.77    0.94
  -2   7  -4   26.00    1.26
  -2   7  -5   68.26    1.48
  -2   7  -5   67.32    2.03
  -2   7  -6    6.50    0.53
  -2   7  -6    8.96    0.52
  -2   7  -6    8.32    0.75
  -2   7  -6    7.34    0.72
  -2   7  -7   10.92    0.79
  -2   7  -7   11.45    0.82
  -2   7  -8    4.10    0.46
  -2   7  -8    4.05    0.47
  -2   7  -9    4.43    0.36
  -2   7  -9    3.95    0.36
  -2   6  11    0.63    0.18
  -2   6  11    0.47    0.12
   2  -6 -10    4.79    0.39
  -2   6  10    4.93    0.50
  -2   6   9   37.21    1.43
  -2   6   8    7.24    0.72
  -2   6   7    1.60    0.44
  -2   6   7    1.67    0.35
  -2   6   7    1.76    0.43
  -2   6   6   13.37    0.92
  -2   6   6   13.58    0.85
  -2   6   6   10.35    0.76
  -2   6   6   12.44    0.90
  -2   6   6   12.68    0.79
  -2   6   5   24.83    1.11
  -2   6   5   24.31    1.18
  -2   6   5   24.61    1.03
  -2   6   5   23.41    1.10
  -2   6   4   47.08    1.48
  -2   6   3    2.41    0.32
  -2   6   3    2.34    0.35
  -2   6   2    4.69    0.41
  -2   6   2    3.96    0.41
  -2   6   1    0.48    0.19
  -2   6   1    0.63    0.21
  -2   6   0    6.58    0.53
  -2   6   0    6.63    0.48
  -2   6  -1   50.98    1.44
  -2   6  -2    5.31    0.51
  -2   6  -3    4.03    0.47
  -2   6  -4   15.58    1.02
  -2   6  -4   15.09    0.72
  -2   6  -4   15.15    0.92
  -2   6  -4   15.23    0.91
  -2   6  -5   24.75    0.87
  -2   6  -5   22.26    1.18
  -2   6  -5   22.04    1.12
  -2   6  -6   17.60    1.13
  -2   6  -6   16.33    1.05
  -2   6  -6   15.65    0.81
  -2   6  -7    0.19    0.29
  -2   6  -7    0.69    0.27
  -2   6  -8    6.32    0.65
  -2   6  -9    1.17    0.29
  -2   6  -9    1.03    0.25
  -2   6 -10   24.43    0.74
  -2   6 -10   18.25    0.53
  -2   5  12    2.78    0.24
  -2   5  11   -0.09    0.18
  -2   5  10    3.70    0.50
  -2   5   9   16.15    1.04
  -2   5   8    0.55    0.17
  -2   5   8    0.13    0.23
  -2   5   8   -0.02    0.26
  -2   5   7    0.96    0.36
  -2   5   7    1.01    0.36
  -2   5   7    0.88    0.26
  -2   5   7    1.37    0.28
  -2   5   6   35.96    1.36
  -2   5   5   86.25    1.98
  -2   5   4   48.36    1.38
  -2   5   3    3.51    0.34
  -2   5   3    3.89    0.39
  -2   5   2    5.14    0.42
  -2   5   2    4.95    0.38
  -2   5   1   16.63    0.69
  -2   5   1   16.51    0.71
  -2   5   0   21.28    0.77
  -2   5   0   20.32    0.80
  -2   5  -1  129.77    2.08
  -2   5  -2   10.58    0.64
  -2   5  -2   11.27    0.72
  -2   5  -3   11.88    0.71
  -2   5  -3   12.38    0.81
  -2   5  -4   94.38    2.28
  -2   5  -4   92.14    2.04
  -2   5  -5    4.40    0.53
  -2   5  -5    3.89    0.45
  -2   5  -5    3.88    0.59
  -2   5  -6   66.65    1.83
  -2   5  -6   68.57    1.61
   2  -5   7    7.66    0.63
  -2   5  -7    7.91    0.82
  -2   5  -7    8.33    0.79
  -2   5  -8    0.14    0.21
  -2   5  -8    0.56    0.32
   2  -5   8    0.76    0.23
   2  -5   9   12.98    0.70
  -2   5  -9   14.64    0.86
   2  -5  10    7.35    0.42
  -2   5 -10    7.38    0.52
  -2   5 -10    6.10    0.38
  -2   4  12    8.78    0.50
   2  -4 -12    8.55    0.50
  -2   4  11   37.14    1.32
  -2   4  10    0.71    0.31
  -2   4   9   85.87    2.25
  -2   4   9   84.26    2.36
  -2   4   8   31.12    1.37
  -2   4   8   29.92    1.41
  -2   4   8   28.55    1.23
  -2   4   7    7.70    0.71
  -2   4   7    6.39    0.65
  -2   4   7    7.20    0.60
  -2   4   6  221.76    2.88
  -2   4   5   20.24    0.78
  -2   4   4   93.47    1.44
  -2   4   4   92.62    1.76
  -2   4   3   97.04    1.20
  -2   4   3   97.61    1.66
  -2   4   3   95.68    1.45
  -2   4   2    9.26    0.46
  -2   4   2    9.56    0.50
  -2   4   1  370.56    2.88
  -2   4   1  355.77    2.84
  -2   4   0    0.26    0.14
  -2   4   0    0.39    0.15
  -2   4  -1  177.75    2.26
  -2   4  -1  174.93    2.15
  -2   4  -2    0.06    0.17
  -2   4  -2    0.16    0.11
  -2   4  -3    0.88    0.22
  -2   4  -3    1.12    0.31
  -2   4  -4  138.31    2.30
  -2   4  -4  148.01    2.63
  -2   4  -5   20.55    1.11
  -2   4  -5   19.06    0.90
  -2   4  -6   38.44    1.51
   2  -4   6   37.87    1.29
   2  -4   7   20.98    1.03
  -2   4  -7   22.42    1.21
   2  -4   8    0.98    0.34
  -2   4  -8    0.94    0.41
  -2   4  -8    1.08    0.37
   2  -4   9   25.61    1.08
  -2   4  -9   27.20    1.24
  -2   4 -10    0.89    0.26
  -2   4 -11    8.89    0.44
   2  -4  11    8.22    0.36
   2  -3 -13    7.66    0.36
  -2   3  12    3.47    0.36
  -2   3  11   24.27    1.14
  -2   3  10    7.97    0.68
  -2   3  10    8.06    0.75
  -2   3   9   19.88    1.09
  -2   3   9   19.67    1.16
  -2   3   8    9.51    0.75
  -2   3   8    8.96    0.73
  -2   3   8    9.29    0.76
  -2   3   7    1.63    0.34
  -2   3   6  201.10    2.76
  -2   3   5   42.17    1.13
  -2   3   4   37.58    0.93
  -2   3   3   14.57    0.50
  -2   3   2   11.64    0.45
  -2   3   2   11.49    0.47
  -2   3   2   10.61    0.34
  -2   3   1  989.98    4.13
  -2   3   1 1000.00    4.07
  -2   3   0  156.88    1.56
  -2   3   0  159.57    1.76
  -2   3   0  160.83    1.70
  -2   3  -1    1.04    0.23
  -2   3  -1    1.08    0.19
  -2   3  -1    0.65    0.17
  -2   3  -2    3.34    0.32
  -2   3  -2    3.25    0.34
  -2   3  -2    3.02    0.29
   2  -3   2    2.91    0.23
  -2   3  -3   36.91    1.11
  -2   3  -3   35.42    0.98
   2  -3   3   35.13    0.86
  -2   3  -4    6.00    0.55
   2  -3   4    4.24    0.37
   2  -3   5    2.43    0.34
  -2   3  -5    1.76    0.39
   2  -3   6    0.82    0.24
  -2   3  -6    1.20    0.38
  -2   3  -7   11.62    0.89
   2  -3   7    9.95    0.77
   2  -3   8    2.69    0.50
  -2   3  -8    3.81    0.61
  -2   3  -8    3.14    0.52
   2  -3   9   10.05    0.75
  -2   3  -9   10.84    0.83
  -2   3 -10    2.07    0.36
   2  -3  11    0.79    0.16
  -2   3 -11    0.62    0.17
   2  -2 -13    4.87    0.34
  -2   2  12    9.97    0.59
  -2   2  11   11.16    0.79
  -2   2  10   12.92    0.84
  -2   2  10   12.58    0.92
  -2   2   9   -0.09    0.25
  -2   2   9    0.49    0.27
  -2   2   9    0.30    0.15
  -2   2   8    5.31    0.59
  -2   2   8    5.53    0.64
  -2   2   7   -0.21    0.24
  -2   2   6  214.30    2.84
  -2   2   5   46.05    1.17
  -2   2   4    0.97    0.15
  -2   2   4    1.04    0.19
  -2   2   3    1.00    0.16
  -2   2   3    1.19    0.18
  -2   2   2   11.89    0.39
  -2   2   2   11.91    0.39
  -2   2   2   12.56    0.42
  -2   2   2   12.01    0.41
  -2   2   1  502.80    2.56
  -2   2   1  494.37    2.42
  -2   2   1  496.99    2.37
  -2   2   0  437.39    2.15
  -2   2   0  433.32    2.38
  -2   2   0  440.60    2.46
  -2   2  -1    2.76    0.22
  -2   2  -1    3.12    0.27
  -2   2  -1    3.42    0.28
  -2   2  -1    2.98    0.24
  -2   2  -2  172.21    1.72
  -2   2  -2  175.34    2.00
  -2   2  -3   11.94    0.61
   2  -2   4  227.00    2.61
   2  -2   5  217.41    2.85
   2  -2   6    6.99    0.57
   2  -2   7    1.13    0.35
   2  -2   7    1.02    0.25
  -2   2  -8   31.67    1.45
   2  -2   8   31.12    1.35
  -2   2  -9    5.72    0.68
   2  -2   9    4.11    0.50
  -2   2  -9    5.05    0.58
  -2   2 -10   12.45    0.79
  -2   2 -11   10.29    0.54
   2  -2  11   10.07    0.52
   2  -1 -13    0.14    0.14
  -2   1  12   23.67    0.83
  -2   1  12   24.71    0.90
  -2   1  11    3.05    0.44
  -2   1  11    2.60    0.38
  -2   1  10   22.15    1.05
  -2   1  10   23.25    1.19
  -2   1   9   16.60    0.88
  -2   1   9   17.37    0.99
  -2   1   9   18.98    1.13
  -2   1   8   38.84    1.46
  -2   1   7   43.58    1.42
  -2   1   6    1.26    0.27
  -2   1   5  207.88    2.47
  -2   1   4   42.24    0.98
  -2   1   3   11.64    0.46
  -2   1   2  169.56    1.48
  -2   1   1  419.60    2.16
  -2   1   1  422.69    1.68
   2  -1   0  100.85    0.76
  -2   1   0  102.75    0.88
  -2   1  -1  259.14    1.49
   2  -1   1  256.57    1.40
  -2   1  -2   11.67    0.50
  -2   1  -2   11.01    0.36
  -2   1  -3  443.21    3.39
  -2   1  -4    6.30    0.48
   2  -1   4    6.57    0.48
   2  -1   5  229.68    3.01
   2  -1   6   33.67    1.28
   2  -1   7    3.93    0.48
   2  -1   7    4.69    0.56
   2  -1   8   38.73    1.50
  -2   1  -8   39.53    1.47
  -2   1  -9    0.48    0.25
  -2   1  -9    0.80    0.36
   2  -1   9    0.77    0.34
  -2   1 -10   17.26    0.90
  -2   1 -10   15.89    0.76
   2  -1  10   16.65    0.90
   2  -1  11    6.62    0.44
  -2   1 -11    6.39    0.44
   2   0 -13    1.09    0.22
  -2   0  12   21.43    0.88
  -2   0  11    1.98    0.37
  -2   0  11    2.34    0.42
  -2   0  10    2.52    0.37
  -2   0  10    2.76    0.44
  -2   0  10    2.42    0.46
  -2   0   9   10.62    0.80
  -2   0   9   10.21    0.75
  -2   0   9   12.22    0.88
  -2   0   8   15.27    0.93
  -2   0   7   41.85    1.39
  -2   0   6   44.26    1.29
  -2   0   5   46.54    1.18
  -2   0   4   46.22    1.04
  -2   0   3    6.10    0.35
  -2   0   2   34.74    0.70
  -2   0   1   35.17    0.68
   2   0   0  160.38    1.24
  -2   0  -1   47.19    0.34
   2   0   1   63.94    0.87
   2   0   2    3.28    0.24
  -2   0  -3   49.60    1.11
   2   0   3   48.45    0.98
  -2   0  -4   38.30    1.09
   2   0   5   20.08    0.93
   2   0   6   24.39    1.11
   2   0   7    2.16    0.45
   2   0   7    2.51    0.44
   2   0   8  101.69    2.44
  -2   0  -9   17.68    1.00
   2   0  10   15.28    0.82
  -2   0 -10   14.03    0.79
  -2   0 -10   14.49    0.80
   2   0  11    2.03    0.27
  -2   0 -11    2.04    0.23
  -2   0 -11    2.23    0.28
   2   1 -13    2.73    0.28
  -2  -1  13    2.81    0.27
  -2  -1  12   41.50    1.26
   2   1 -12   42.81    1.33
  -2  -1  11    2.02    0.40
  -2  -1  10   11.60    0.83
  -2  -1  10   12.10    0.84
  -2  -1   9    5.93    0.63
  -2  -1   9    5.62    0.60
  -2  -1   9    5.50    0.59
  -2  -1   8   14.94    0.92
  -2  -1   7  108.01    2.23
  -2  -1   6  110.70    2.04
  -2  -1   5   -0.04    0.16
  -2  -1   4   10.72    0.52
  -2  -1   3  139.48    1.61
  -2  -1   2    3.24    0.26
  -2  -1   1  571.74    2.93
   2   1   0   85.74    1.09
   2   1   1   35.68    0.76
   2   1   2    1.56    0.22
  -2  -1  -3  171.61    2.01
   2   1   3  173.32    2.00
  -2  -1  -4   66.28    1.37
   2   1   4   65.98    1.39
   2   1   5    4.57    0.51
   2   1   6   17.32    0.94
   2   1   7    2.43    0.47
   2   1   7    2.22    0.43
   2   1   7    1.72    0.38
  -2  -1  -8   52.66    1.83
   2   1   8   52.10    1.58
  -2  -1  -9   38.45    1.49
   2   1   9   40.55    1.46
   2   1  10    0.42    0.25
  -2  -1 -10    0.35    0.20
  -2  -1 -10    0.25    0.24
  -2  -1 -11   13.35    0.55
   2   1  11   12.72    0.52
   2   2 -13   19.44    0.58
  -2  -2  13   22.39    0.71
  -2  -2  12   17.93    0.85
   2   2 -12   18.47    0.83
  -2  -2  11   37.85    1.38
   2   2 -10   17.33    0.96
  -2  -2  10   16.83    0.96
  -2  -2  10   17.88    1.01
  -2  -2   9   36.78    1.38
   2   2  -9   33.00    1.24
  -2  -2   9   36.26    1.37
  -2  -2   8    7.23    0.65
  -2  -2   7   22.95    1.04
  -2  -2   6   21.38    0.92
  -2  -2   5   47.56    1.22
  -2  -2   4    1.18    0.21
   2   2  -4    1.11    0.18
   2   2  -3  169.40    1.46
  -2  -2   3  181.88    1.89
  -2  -2   2  316.48    2.34
   2   2  -1  629.84    3.25
   2   2  -1  621.99    1.78
   2   2   0   30.54    0.48
   2   2   0   31.40    0.77
   2   2   0   29.41    0.41
   2   2   1   17.19    0.61
   2   2   2   24.74    0.78
  -2  -2  -3   40.68    0.94
   2   2   3   41.64    1.08
  -2  -2  -4  104.04    1.64
   2   2   4  104.40    1.87
   2   2   5   64.86    1.62
   2   2   5   63.54    1.71
   2   2   6    6.23    0.61
   2   2   6    5.84    0.58
   2   2   7    2.14    0.43
   2   2   7    2.16    0.39
  -2  -2  -8   -0.28    0.34
   2   2   8   -0.03    0.27
   2   2   8    0.01    0.17
   2   2   9   20.91    1.01
  -2  -2  -9   21.51    1.13
   2   2   9   18.38    0.87
  -2  -2 -10    3.00    0.34
   2   2  10    4.14    0.38
  -2  -2 -10    3.92    0.43
  -2  -2 -11    0.61    0.13
  -2  -3  13   27.16    0.73
  -2  -3  12    1.23    0.27
   2   3 -12    1.61    0.27
  -2  -3  11   60.69    1.71
   2   3 -11   58.31    1.58
  -2  -3  10   35.69    1.40
   2   3 -10   36.95    1.40
  -2  -3  10   36.25    1.32
   2   3  -9   15.07    0.91
   2   3  -9   13.79    0.81
  -2  -3   9   13.46    0.84
  -2  -3   9   14.59    0.92
  -2  -3   8   99.99    2.28
   2   3  -8  103.29    2.23
   2   3  -8   98.72    1.91
  -2  -3   8   95.50    2.05
  -2  -3   7    2.30    0.37
   2   3  -7    2.45    0.36
  -2  -3   6   22.20    0.93
   2   3  -6   21.85    0.88
   2   3  -5  128.91    1.88
  -2  -3   5  127.18    1.98
   2   3  -4   10.09    0.49
  -2  -3   4   10.07    0.52
   2   3  -3  260.12    2.12
  -2  -3   3  265.56    2.38
   2   3  -2    0.81    0.19
  -2  -3   2    3.40    0.28
   2   3  -1  167.23    1.26
   2   3  -1  169.76    1.91
   2   3   0    4.83    0.36
   2   3   0    4.68    0.22
   2   3   0    4.48    0.24
   2   3   1    4.91    0.29
   2   3   1    4.72    0.37
   2   3   2    0.85    0.21
   2   3   3    7.79    0.53
   2   3   4   17.53    0.83
   2   3   5    6.53    0.61
   2   3   5    6.59    0.55
   2   3   6    0.37    0.26
   2   3   6   -0.08    0.24
   2   3   6    0.08    0.18
   2   3   7    0.31    0.29
  -2  -3  -7   -0.47    0.29
   2   3   7    0.09    0.20
   2   3   7   -0.65    0.25
  -2  -3  -8    5.28    0.65
   2   3   8    5.57    0.59
   2   3   8    5.54    0.56
   2   3   8    4.62    0.47
  -2  -3  -9   16.82    0.95
   2   3   9   15.89    0.83
   2   3   9   16.90    0.82
  -2  -3 -10    1.31    0.26
  -2  -4  13   23.98    0.59
  -2  -4  12   18.88    0.78
  -2  -4  11    1.32    0.32
  -2  -4  10   10.96    0.77
   2   4 -10    9.19    0.70
   2   4  -9    4.12    0.48
  -2  -4   9    4.37    0.52
   2   4  -8  108.51    2.36
   2   4  -8  103.46    2.02
   2   4  -7  108.60    2.23
   2   4  -6    0.30    0.18
  -2  -4   6    0.09    0.21
   2   4  -5  150.88    2.22
  -2  -4   5  150.10    2.14
   2   4  -4    0.73    0.22
  -2  -4   4    0.83    0.19
   2   4  -3   40.16    1.05
  -2  -4   3   41.76    0.98
   2   4  -2  239.89    2.52
   2   4  -1   14.13    0.53
   2   4  -1   14.66    0.46
   2   4  -1   15.16    0.65
   2   4   0   55.68    0.90
   2   4   0   57.59    1.30
   2   4   0   57.33    0.98
   2   4   1   22.95    0.86
   2   4   1   22.28    0.67
   2   4   2  149.53    2.27
   2   4   2  146.91    1.92
   2   4   3   14.83    0.76
   2   4   3   14.31    0.66
   2   4   4   14.07    0.79
   2   4   4   14.09    0.80
   2   4   5   24.75    1.10
  -2  -4  -5   25.25    1.17
   2   4   5   23.25    1.08
   2   4   5   21.79    1.02
   2   4   5   23.38    1.17
   2   4   6    3.76    0.49
  -2  -4  -6    3.74    0.51
   2   4   6    4.09    0.56
   2   4   7    3.54    0.48
   2   4   7    3.77    0.54
   2   4   7    3.80    0.49
  -2  -4  -7    4.61    0.56
   2   4   8   36.00    1.39
  -2  -4  -8   32.78    1.37
   2   4   8   32.05    1.15
  -2  -4  -9    0.91    0.28
   2   4   9    0.91    0.17
  -2  -4 -10    3.55    0.31
  -2  -5  12    6.77    0.42
  -2  -5  11    0.56    0.23
  -2  -5  10    0.75    0.30
   2   5 -10    0.41    0.23
  -2  -5   9    1.18    0.31
   2   5  -9    0.90    0.26
   2   5  -8   48.46    1.44
   2   5  -7   79.74    1.78
   2   5  -7   79.56    1.99
   2   5  -6    3.03    0.41
   2   5  -5   15.58    0.77
   2   5  -4    0.43    0.17
   2   5  -3   21.18    0.83
   2   5  -2  119.20    1.97
   2   5  -2  121.31    1.93
   2   5  -1    7.88    0.45
   2   5  -1    8.08    0.54
   2   5  -1    8.00    0.39
   2   5   0    0.21    0.19
   2   5   0    0.21    0.07
   2   5   1   81.60    1.74
   2   5   1   79.95    1.41
   2   5   2    0.52    0.15
   2   5   2    0.82    0.23
   2   5   3   86.86    1.94
   2   5   4   17.40    1.01
   2   5   4   17.19    0.92
   2   5   5   16.28    0.94
  -2  -5  -5   16.35    0.95
   2   5   5   15.78    1.02
  -2  -5  -6    1.87    0.36
   2   5   6    1.03    0.34
   2   5   6    0.61    0.40
  -2  -5  -7    6.11    0.63
   2   5   7    5.84    0.65
   2   5   7    6.50    0.63
   2   5   8   17.80    0.83
  -2  -5  -8   18.88    0.92
   2   5   8   17.13    0.92
  -2  -5  -9    0.11    0.15
   2   5   9    0.09    0.10
  -2  -6  11    6.01    0.43
   2   6 -10    3.78    0.43
  -2  -6  10    4.87    0.47
  -2  -6   9   10.67    0.74
   2   6  -9   11.10    0.70
   2   6  -8   11.04    0.72
  -2  -6   8   10.58    0.77
   2   6  -7   55.84    1.57
   2   6  -6    1.82    0.36
   2   6  -6    1.85    0.41
   2   6  -5   14.93    0.83
   2   6  -5   13.60    0.88
   2   6  -5   16.17    0.83
   2   6  -4    2.93    0.42
   2   6  -3    2.46    0.33
   2   6  -3    2.64    0.37
   2   6  -2   83.62    1.72
   2   6  -2   84.55    1.80
   2   6  -1   48.35    1.35
   2   6   0    1.94    0.28
   2   6   1   64.72    1.64
   2   6   2   66.04    1.71
   2   6   2   64.83    1.72
   2   6   3   70.94    2.00
   2   6   3   74.63    1.96
   2   6   3   75.44    1.88
   2   6   4   74.09    2.03
   2   6   4   73.27    2.12
   2   6   5    0.88    0.35
   2   6   5    0.22    0.31
   2   6   6   40.62    1.47
   2   6   6   42.24    1.61
  -2  -6  -6   39.64    1.35
   2   6   7    1.56    0.38
  -2  -6  -7    2.05    0.34
   2   6   8   17.37    0.74
  -2  -6  -8   15.25    0.65
   2   6   9    6.13    0.36
   2   7 -11    6.29    0.39
   2   7 -10   11.48    0.60
  -2  -7  10   11.90    0.57
   2   7  -9   18.09    0.82
  -2  -7   9   16.25    0.77
  -2  -7   8   18.83    0.91
   2   7  -8   19.87    0.92
   2   7  -7   14.04    0.82
   2   7  -6   27.01    1.19
   2   7  -6   29.24    1.17
   2   7  -5   13.65    0.82
   2   7  -5   12.90    0.84
   2   7  -4    7.76    0.66
   2   7  -4    6.87    0.60
   2   7  -4    7.34    0.62
   2   7  -3   58.75    1.59
   2   7  -3   57.02    1.59
   2   7  -2   10.55    0.64
   2   7  -2    9.51    0.71
   2   7  -2    9.69    0.73
   2   7  -1   13.34    0.68
   2   7  -1   11.97    0.75
   2   7  -1   13.65    0.85
   2   7   0    1.65    0.27
   2   7   0    1.04    0.35
   2   7   0    0.99    0.29
   2   7   1   26.83    1.12
   2   7   1   28.85    1.14
   2   7   2   12.45    0.90
   2   7   2   11.02    0.79
   2   7   3   23.80    1.25
   2   7   3   23.06    1.14
   2   7   4    8.29    0.74
   2   7   4    7.93    0.76
   2   7   5    6.26    0.63
   2   7   6   12.96    0.81
   2   7   6   12.77    0.83
   2   7   7   13.53    0.70
   2   7   7   12.54    0.70
   2   7   8    1.77    0.24
   2   8 -10    0.37    0.14
   2   8  -9    5.60    0.42
   2   8  -9    4.82    0.43
   2   8  -8    3.89    0.40
   2   8  -8    3.38    0.41
   2   8  -7    0.73    0.29
   2   8  -7    0.41    0.31
   2   8  -6    0.55    0.31
   2   8  -6    0.62    0.28
   2   8  -5   12.35    0.79
   2   8  -5   11.99    0.80
   2   8  -4   42.43    1.40
   2   8  -4   42.06    1.41
   2   8  -3   43.58    1.40
   2   8  -3   45.32    1.49
   2   8  -2   19.46    1.03
   2   8  -1   10.78    0.81
   2   8  -1   12.56    0.69
   2   8   0    6.83    0.51
   2   8   0    6.35    0.65
   2   8   1   26.18    1.25
   2   8   1   24.46    1.08
   2   8   2   28.74    1.22
   2   8   2   29.08    1.31
   2   8   3    9.72    0.74
   2   8   3   10.10    0.81
   2   8   4    0.89    0.33
   2   8   4    0.57    0.33
   2   8   5    0.63    0.25
   2   8   5    0.30    0.24
   2   8   6    2.00    0.32
   2   8   6    1.77    0.31
   2   8   7    3.49    0.29
   2   9  -9    3.28    0.25
   2   9  -8   24.76    0.77
   2   9  -8   19.81    0.62
   2   9  -7    2.53    0.33
   2   9  -6    0.83    0.26
   2   9  -5   29.41    1.11
   2   9  -4   12.88    0.77
   2   9  -3   67.29    1.75
   2   9  -2   19.36    0.81
   2   9  -2   21.70    1.04
   2   9  -1   -0.56    0.38
   2   9   0    7.56    0.51
   2   9   0    7.86    0.70
   2   9   1    0.73    0.32
   2   9   2   46.06    1.50
   2   9   3    0.55    0.23
   2   9   4    0.10    0.18
   2   9   5    3.77    0.35
   2   9   6    0.80    0.14
   2  10  -7   12.29    0.47
   2  10  -6    1.01    0.21
   2  10  -5    7.74    0.49
   2  10  -4    0.33    0.20
   2  10  -3    8.72    0.58
   2  10  -2   21.71    0.90
   2  10  -1    2.18    0.28
   2  10  -1    2.73    0.38
   2  10   0   13.39    0.72
   2  10   0    8.94    0.52
   2  10   1    0.21    0.22
   2  10   2   12.17    0.62
   2  10   3    1.54    0.24
   2  10   4    4.91    0.30
   2  11  -5    0.61    0.11
   2  11  -4    0.16    0.12
   2  11  -3    0.87    0.19
   2  11  -2    0.46    0.16
   2  11  -1    0.18    0.13
   2  11   0    0.33    0.13
   2  11   0    0.53    0.08
   2  11   1    1.79    0.19
  -3  11   5    2.23    0.17
  -3  11   5    1.82    0.20
  -3  11   4    4.76    0.34
  -3  11   4    6.00    0.33
  -3  11   3    2.03    0.25
  -3  11   3    1.96    0.26
  -3  11   2    1.02    0.21
  -3  11   2    0.95    0.17
  -3  11   2    1.03    0.20
  -3  11   2    0.79    0.20
  -3  11   1   20.01    0.65
  -3  11   1   19.49    0.63
  -3  11   0    0.33    0.18
  -3  11   0    0.36    0.17
  -3  11   0    0.30    0.18
  -3  11  -1   10.41    0.52
  -3  11  -1   10.93    0.52
  -3  11  -1    9.80    0.49
  -3  11  -2    0.46    0.18
  -3  11  -2    0.76    0.21
  -3  11  -3    2.64    0.26
  -3  11  -3    3.29    0.28
  -3  11  -4    0.13    0.12
  -3  10   7    2.05    0.22
  -3  10   6    4.02    0.35
  -3  10   6    4.51    0.29
  -3  10   5    5.01    0.37
  -3  10   5    3.66    0.38
  -3  10   4    0.09    0.17
  -3  10   4    0.08    0.18
  -3  10   3    0.86    0.29
  -3  10   3    1.47    0.27
  -3  10   3    1.57    0.31
  -3  10   3    1.53    0.29
  -3  10   2    1.81    0.30
  -3  10   2    1.58    0.31
  -3  10   2    1.71    0.27
  -3  10   2    1.66    0.34
  -3  10   2    1.56    0.30
  -3  10   1   33.51    1.09
  -3  10   1   36.24    1.16
  -3  10   1   34.07    1.12
  -3  10   1   32.71    0.99
  -3  10   1   34.92    1.19
  -3  10   0    1.54    0.36
  -3  10   0    1.67    0.30
  -3  10   0    1.42    0.28
  -3  10   0    1.55    0.31
  -3  10   0    1.41    0.29
  -3  10  -1    8.42    0.60
  -3  10  -1   10.26    0.63
  -3  10  -1    9.62    0.60
  -3  10  -2   23.67    0.89
  -3  10  -2   23.74    0.87
  -3  10  -2   22.93    0.95
  -3  10  -3    5.12    0.43
  -3  10  -3    4.82    0.43
  -3  10  -4    9.04    0.51
  -3  10  -4   12.21    0.55
  -3  10  -5    1.53    0.20
  -3  10  -6    5.75    0.31
  -3   9   9    0.15    0.08
  -3   9   8    3.40    0.30
  -3   9   8    2.56    0.29
  -3   9   7    0.52    0.19
  -3   9   6    6.67    0.44
  -3   9   6    6.49    0.57
  -3   9   5   20.12    1.02
  -3   9   5   18.11    0.97
  -3   9   5   19.34    0.83
  -3   9   5   20.84    0.99
  -3   9   4    0.83    0.28
  -3   9   4    1.01    0.29
  -3   9   4    0.89    0.33
  -3   9   4    1.00    0.36
  -3   9   4    1.34    0.36
  -3   9   3   19.58    1.04
  -3   9   3   20.43    0.88
  -3   9   3   19.20    1.00
  -3   9   3   19.96    0.94
  -3   9   3   19.49    1.00
  -3   9   2    0.82    0.28
  -3   9   2    0.51    0.30
  -3   9   2    0.53    0.28
  -3   9   2    0.67    0.28
  -3   9   2    0.53    0.27
  -3   9   1   33.84    1.23
  -3   9   1   36.28    1.25
  -3   9   1   33.70    1.27
  -3   9   1   36.65    1.39
  -3   9   0   12.95    0.80
  -3   9   0   14.20    0.78
  -3   9   0   14.21    0.85
  -3   9   0   14.44    0.82
  -3   9   0   14.04    0.88
  -3   9  -1    0.06    0.24
  -3   9  -1   -0.19    0.19
  -3   9  -1    0.21    0.17
  -3   9  -1    0.21    0.28
  -3   9  -1    0.36    0.30
  -3   9  -2   24.64    1.00
  -3   9  -2   23.33    0.97
  -3   9  -2   23.94    1.10
  -3   9  -3    2.40    0.37
  -3   9  -3    2.33    0.42
  -3   9  -3    2.45    0.46
  -3   9  -4   14.97    0.89
  -3   9  -4   13.62    0.81
  -3   9  -4   14.57    0.70
  -3   9  -5   13.85    0.60
  -3   9  -5   13.62    0.78
  -3   9  -6   19.44    0.80
  -3   9  -6   16.87    0.70
  -3   9  -7    4.26    0.29
  -3   9  -7    5.28    0.34
  -3   8  10    2.98    0.25
  -3   8  10    2.26    0.20
  -3   8   9    9.02    0.48
  -3   8   9    8.31    0.53
  -3   8   8    5.83    0.44
  -3   8   8    5.22    0.52
  -3   8   7    6.59    0.61
  -3   8   7    5.02    0.56
  -3   8   6    8.82    0.74
  -3   8   6    8.78    0.68
  -3   8   5   89.82    1.80
  -3   8   5   96.72    2.33
  -3   8   5   87.27    2.29
  -3   8   5   97.83    2.19
  -3   8   4    2.56    0.41
  -3   8   4    2.11    0.44
  -3   8   4    2.14    0.47
  -3   8   4    2.65    0.51
  -3   8   3   17.31    0.99
  -3   8   3   17.11    0.84
  -3   8   3   17.64    1.00
  -3   8   3   17.97    1.01
  -3   8   2    5.49    0.53
  -3   8   2    5.90    0.65
  -3   8   2    5.38    0.56
  -3   8   2    5.45    0.58
  -3   8   2    5.49    0.54
  -3   8   2    4.60    0.51
  -3   8   1   14.28    0.83
  -3   8   1   15.68    0.85
  -3   8   1   15.58    0.86
  -3   8   1   16.35    0.94
  -3   8   1   15.32    0.94
  -3   8   0   51.65    1.46
  -3   8   0   51.27    1.49
  -3   8   0   51.73    1.63
  -3   8   0   49.81    1.67
  -3   8   0   48.16    1.56
  -3   8  -1    0.49    0.31
  -3   8  -1    0.82    0.25
  -3   8  -1    0.98    0.30
  -3   8  -1    0.69    0.35
  -3   8  -1    1.03    0.31
  -3   8  -2   47.56    1.39
  -3   8  -2   48.39    1.64
  -3   8  -2   50.30    1.69
  -3   8  -2   49.53    1.61
  -3   8  -3    4.31    0.48
  -3   8  -3    4.14    0.54
  -3   8  -3    4.20    0.46
  -3   8  -3    4.11    0.58
  -3   8  -4    7.39    0.57
  -3   8  -4    6.83    0.67
  -3   8  -4    6.87    0.68
  -3   8  -5   20.16    1.04
  -3   8  -5   22.86    0.84
  -3   8  -5   22.76    1.11
  -3   8  -6    6.83    0.59
  -3   8  -6    7.54    0.61
  -3   8  -7   11.21    0.62
  -3   8  -7   11.85    0.64
  -3   8  -8    4.49    0.31
  -3   8  -8    4.36    0.29
  -3   7  11    1.72    0.19
  -3   7  10    4.24    0.39
  -3   7   9   28.30    1.10
  -3   7   8    0.39    0.26
  -3   7   8    0.33    0.28
  -3   7   7   45.05    1.54
  -3   7   7   41.52    1.47
  -3   7   7   42.57    1.62
  -3   7   6   21.94    1.05
  -3   7   6   20.99    1.15
  -3   7   6   22.16    1.14
  -3   7   5   32.52    1.13
  -3   7   5   35.12    1.45
  -3   7   5   33.38    1.34
  -3   7   5   34.58    1.32
  -3   7   4   20.95    0.90
  -3   7   4   20.88    1.09
  -3   7   4   22.21    1.09
  -3   7   4   20.79    1.04
  -3   7   3   22.72    0.92
  -3   7   3   23.24    1.06
  -3   7   3   23.32    1.12
  -3   7   3   23.74    1.11
  -3   7   3   24.43    1.14
  -3   7   3   23.34    1.07
  -3   7   2   18.54    0.87
  -3   7   2   17.38    0.84
  -3   7   2   17.32    0.88
  -3   7   2   19.42    0.97
  -3   7   2   18.29    0.91
  -3   7   2   18.82    1.01
  -3   7   1   27.32    1.09
  -3   7   1   26.52    1.00
  -3   7   1   26.42    1.08
  -3   7   1   27.28    1.08
  -3   7   1   28.77    1.14
  -3   7   0    5.60    0.53
  -3   7   0    5.30    0.50
  -3   7   0    5.06    0.51
  -3   7   0    4.39    0.51
  -3   7  -1    5.00    0.53
  -3   7  -1    5.05    0.47
  -3   7  -1    4.94    0.45
  -3   7  -1    4.82    0.57
  -3   7  -1    4.71    0.52
  -3   7  -1    5.16    0.57
  -3   7  -2    1.52    0.37
  -3   7  -2    0.54    0.20
  -3   7  -2    0.38    0.28
  -3   7  -2    0.69    0.36
  -3   7  -2    1.26    0.28
  -3   7  -2    0.88    0.24
  -3   7  -3    1.05    0.31
  -3   7  -3    0.95    0.31
  -3   7  -3    0.80    0.34
  -3   7  -3    0.82    0.30
  -3   7  -4   28.23    1.03
  -3   7  -4   27.70    1.29
  -3   7  -4   28.31    1.32
  -3   7  -5    4.72    0.44
  -3   7  -5    5.11    0.63
  -3   7  -5    4.72    0.57
  -3   7  -6   13.10    0.89
  -3   7  -6   13.33    0.87
  -3   7  -7    5.00    0.54
  -3   7  -7    4.81    0.48
  -3   7  -8    2.76    0.36
  -3   7  -8    2.52    0.31
  -3   7  -9    1.26    0.17
  -3   6  11    1.90    0.28
  -3   6  10   10.43    0.72
  -3   6   9   11.15    0.81
  -3   6   9   10.33    0.80
  -3   6   8    2.93    0.43
  -3   6   8    2.77    0.52
  -3   6   8    2.32    0.43
  -3   6   7    7.99    0.63
  -3   6   7    7.29    0.66
  -3   6   7    7.92    0.77
  -3   6   7    7.90    0.72
  -3   6   6    0.76    0.31
  -3   6   6    0.35    0.29
  -3   6   6    0.87    0.38
  -3   6   6    0.39    0.23
  -3   6   6    0.33    0.37
  -3   6   5    8.63    0.60
  -3   6   5    7.94    0.68
  -3   6   5    8.32    0.68
  -3   6   5    8.75    0.67
  -3   6   5    9.15    0.67
  -3   6   4   28.70    1.16
  -3   6   3    9.21    0.64
  -3   6   3   10.61    0.62
  -3   6   2   55.72    1.40
  -3   6   2   56.65    1.48
  -3   6   1   55.99    1.42
  -3   6   1   53.07    1.39
  -3   6   0    6.62    0.54
  -3   6  -1    0.33    0.22
  -3   6  -2   32.25    1.21
  -3   6  -3    7.09    0.55
  -3   6  -3    7.20    0.59
  -3   6  -3    7.29    0.67
  -3   6  -3    7.41    0.53
  -3   6  -3    6.44    0.60
  -3   6  -4   80.33    1.95
  -3   6  -4   86.22    2.38
  -3   6  -4   84.22    1.66
  -3   6  -4   83.42    2.18
  -3   6  -4   81.78    2.12
  -3   6  -5   10.03    0.60
  -3   6  -5   10.13    0.91
  -3   6  -5    9.74    0.84
  -3   6  -5   10.58    0.82
  -3   6  -6   17.47    1.14
  -3   6  -6   14.64    1.00
  -3   6  -6   15.77    0.95
  -3   6  -7    3.28    0.54
  -3   6  -7    2.41    0.39
  -3   6  -8    2.57    0.40
  -3   6  -8    1.75    0.30
  -3   6  -9   11.82    0.60
   3  -5 -12    5.94    0.35
  -3   5  12    7.20    0.44
  -3   5  11   13.99    0.80
  -3   5  10   14.04    0.93
  -3   5  10   12.82    0.85
  -3   5   9   25.32    1.29
  -3   5   9   26.75    1.33
  -3   5   8    1.33    0.42
  -3   5   8    0.98    0.33
  -3   5   8    1.60    0.32
  -3   5   7   20.86    1.01
  -3   5   7   20.51    0.94
  -3   5   7   20.90    1.14
  -3   5   7   18.13    0.99
  -3   5   7   20.72    1.14
  -3   5   6   47.87    1.54
  -3   5   5    2.51    0.35
  -3   5   4   56.33    1.48
  -3   5   3    6.68    0.46
  -3   5   3    7.19    0.52
  -3   5   2   13.67    0.64
  -3   5   2   13.12    0.66
  -3   5   1  232.75    2.63
  -3   5   1  238.32    2.62
  -3   5   0    0.17    0.14
  -3   5   0    0.16    0.14
  -3   5  -1    4.48    0.43
  -3   5  -2   31.68    1.23
  -3   5  -2   29.60    1.06
  -3   5  -3   36.63    1.40
  -3   5  -3   36.82    1.23
  -3   5  -4   56.14    1.55
  -3   5  -4   57.62    1.86
  -3   5  -4   60.25    1.77
  -3   5  -5   12.26    0.96
  -3   5  -5   10.80    0.84
  -3   5  -5   10.11    0.58
  -3   5  -6    3.65    0.59
  -3   5  -6    3.76    0.53
  -3   5  -7   12.25    0.92
  -3   5  -7   12.32    0.95
  -3   5  -8    9.28    0.76
  -3   5  -8    7.63    0.57
   3  -5   9   43.31    0.98
  -3   5  -9   48.09    1.34
  -3   5 -10    0.50    0.15
  -3   4  12    0.38    0.19
  -3   4  11   27.50    1.20
  -3   4  10    0.05    0.23
  -3   4  10    0.46    0.34
  -3   4   9    1.32    0.42
  -3   4   9    0.97    0.38
  -3   4   8   46.01    1.70
  -3   4   8   38.16    1.55
  -3   4   7    4.41    0.47
  -3   4   6   89.92    1.83
  -3   4   5   36.55    1.04
  -3   4   5   38.41    1.20
  -3   4   4    0.83    0.14
  -3   4   4    0.97    0.21
  -3   4   3   20.73    0.77
  -3   4   2   21.86    0.72
  -3   4   2   23.07    0.77
  -3   4   1  427.59    3.21
  -3   4   1  433.05    3.17
  -3   4   0  121.08    1.79
  -3   4   0  121.22    1.64
  -3   4   0  117.17    1.59
  -3   4  -1   42.31    1.18
  -3   4  -1   41.80    1.08
  -3   4  -1   44.46    1.11
  -3   4  -2  118.66    2.12
  -3   4  -2  120.45    2.02
  -3   4  -2  114.44    1.88
  -3   4  -3    1.24    0.33
  -3   4  -3    1.50    0.22
  -3   4  -4   51.34    1.36
  -3   4  -4   55.52    1.72
  -3   4  -5   15.87    0.96
  -3   4  -5   16.13    1.04
   3  -4   6    5.96    0.55
  -3   4  -6    5.05    0.64
  -3   4  -6    6.00    0.68
   3  -4   7    7.19    0.65
  -3   4  -7    7.33    0.71
  -3   4  -7    7.19    0.74
   3  -4   8   25.89    1.07
  -3   4  -8   27.20    1.25
   3  -4   9   11.99    0.64
  -3   4  -9   13.12    0.77
  -3   4 -10    2.12    0.26
   3  -4  10    1.86    0.20
  -3   3  13   10.83    0.45
  -3   3  12   18.93    0.88
  -3   3  11   35.16    1.24
  -3   3  11   35.32    1.42
  -3   3  10   11.08    0.82
  -3   3  10   10.89    0.88
  -3   3   9    3.81    0.53
  -3   3   8   85.53    2.13
  -3   3   8   89.63    2.28
  -3   3   8   84.12    2.02
  -3   3   7    6.86    0.60
  -3   3   6   55.72    1.47
  -3   3   5   84.73    1.62
  -3   3   4   17.38    0.66
  -3   3   4   16.13    0.60
  -3   3   3   31.25    0.83
  -3   3   3   30.58    0.75
  -3   3   3   31.17    0.84
  -3   3   2   56.57    1.01
  -3   3   2   56.33    0.93
  -3   3   2   56.93    1.14
  -3   3   2   58.47    1.06
  -3   3   1  398.24    2.71
  -3   3   1  390.58    3.00
  -3   3   1  388.64    2.58
  -3   3   0   34.87    0.84
  -3   3   0   33.75    0.85
  -3   3   0   32.02    0.88
  -3   3  -1    2.39    0.29
  -3   3  -1    1.99    0.23
  -3   3  -1    2.07    0.29
  -3   3  -2  138.89    2.05
  -3   3  -2  135.27    1.78
  -3   3  -2  138.01    2.11
  -3   3  -3    0.98    0.26
  -3   3  -3    1.10    0.21
  -3   3  -3    1.09    0.27
   3  -3   3    0.84    0.18
  -3   3  -4  259.78    3.45
   3  -3   4  244.68    2.86
  -3   3  -5   15.17    0.95
  -3   3  -6   53.79    1.83
  -3   3  -6   57.62    1.84
   3  -3   6   52.80    1.61
   3  -3   7   70.50    1.92
  -3   3  -7   70.12    2.14
  -3   3  -7   68.92    2.09
   3  -3   8    0.95    0.32
  -3   3  -8    1.21    0.40
  -3   3  -8    1.28    0.38
   3  -3   9   16.18    0.81
  -3   3  -9   15.94    0.89
   3  -3  10    7.53    0.45
  -3   3 -10    7.28    0.49
  -3   2  13    0.19    0.09
  -3   2  12   14.34    0.80
  -3   2  11    0.00    0.25
  -3   2  11   -0.18    0.24
  -3   2  10    1.58    0.36
  -3   2   9   13.08    0.91
  -3   2   9   12.78    0.89
  -3   2   9   12.16    0.84
  -3   2   9   11.17    0.91
  -3   2   8   60.92    1.84
  -3   2   7   54.07    1.60
  -3   2   6  130.14    2.25
  -3   2   5  126.50    1.99
  -3   2   5  122.13    1.43
  -3   2   4   16.94    0.66
  -3   2   4   16.29    0.55
  -3   2   3   80.11    1.27
  -3   2   3   81.54    1.23
  -3   2   3   84.09    1.17
  -3   2   2  277.45    2.26
  -3   2   2  275.63    1.91
  -3   2   1  121.97    1.28
  -3   2   1  117.14    1.49
  -3   2   1  119.52    1.17
  -3   2   0   49.17    0.82
  -3   2   0   46.62    0.85
  -3   2   0   48.49    0.97
  -3   2  -1   38.59    0.88
  -3   2  -1   36.19    0.86
  -3   2  -1   39.30    0.76
   3  -2   1   36.50    0.48
  -3   2  -2   29.38    0.71
  -3   2  -2   30.17    0.96
  -3   2  -2   28.75    0.74
  -3   2  -3  165.87    2.49
  -3   2  -4    1.89    0.35
   3  -2   4    1.34    0.29
   3  -2   5   68.52    1.73
  -3   2  -6   16.85    1.00
   3  -2   6   15.45    0.90
   3  -2   6   15.55    0.90
  -3   2  -7   35.62    1.51
  -3   2  -7   37.87    1.52
   3  -2   7   35.10    1.41
  -3   2  -8   35.87    1.48
  -3   2  -8   35.01    1.44
   3  -2   9    0.48    0.24
  -3   2  -9    0.71    0.29
  -3   2 -10    2.85    0.35
   3  -2  10    2.65    0.32
  -3   1  13    1.14    0.16
  -3   1  12   12.68    0.60
  -3   1  12   13.21    0.74
  -3   1  11    1.61    0.40
  -3   1  11    1.18    0.28
  -3   1  10    1.65    0.39
  -3   1  10    1.71    0.44
  -3   1   9   81.00    2.25
  -3   1   9   72.27    1.73
  -3   1   9   75.50    2.06
  -3   1   9   78.01    2.23
  -3   1   8    0.46    0.22
  -3   1   7   75.00    1.89
  -3   1   6    2.28    0.35
  -3   1   5    0.38    0.14
  -3   1   5    0.44    0.23
  -3   1   4   92.19    1.53
  -3   1   3   10.36    0.49
  -3   1   2   22.02    0.66
  -3   1   2   22.05    0.42
  -3   1   1   19.64    0.62
  -3   1   0   41.34    0.57
   3  -1   0   40.28    0.66
  -3   1  -1    1.23    0.18
  -3   1  -1    1.13    0.12
  -3   1  -2   21.05    0.79
  -3   1  -2   20.42    0.59
   3  -1   2   21.74    0.58
   3  -1   3  136.93    1.65
  -3   1  -3  137.07    2.18
  -3   1  -4   38.50    1.26
   3  -1   5    0.99    0.32
  -3   1  -6   31.26    1.28
   3  -1   6   34.92    1.36
   3  -1   6   36.06    1.39
  -3   1  -7    4.40    0.58
   3  -1   7    4.86    0.55
  -3   1  -7    3.89    0.54
  -3   1  -8   33.80    1.32
  -3   1  -8   33.34    1.38
  -3   1  -9    8.98    0.60
   3  -1   9    9.78    0.69
  -3   1  -9    8.94    0.65
   3  -1  10    4.22    0.40
  -3   1 -10    3.38    0.31
  -3   1 -10    3.65    0.36
   3   0 -13   -0.04    0.11
  -3   0  13   -0.08    0.15
  -3   0  12   65.95    1.52
  -3   0  12   64.94    1.54
  -3   0  11   10.66    0.73
  -3   0  11   10.95    0.81
  -3   0  11   10.46    0.73
  -3   0  10    9.75    0.74
  -3   0  10   10.24    0.81
  -3   0  10    8.14    0.82
  -3   0   9   20.01    1.12
  -3   0   9   18.68    1.04
  -3   0   9   17.61    0.94
  -3   0   9   16.73    1.09
  -3   0   8    1.90    0.38
  -3   0   7    2.64    0.40
  -3   0   6    4.62    0.46
  -3   0   5    5.42    0.45
  -3   0   4  146.35    1.96
  -3   0   3    3.93    0.32
  -3   0   2  102.30    1.45
  -3   0   2   43.08    0.30
   3   0  -1    2.15    0.21
   3   0   0   12.33    0.45
   3   0   1    3.21    0.26
  -3   0  -2   29.83    0.66
   3   0   2   31.47    0.80
  -3   0  -3  154.97    2.28
   3   0   3  158.97    1.95
   3   0   4    5.33    0.42
  -3   0  -4    4.77    0.48
   3   0   5    0.12    0.15
   3   0   6   12.88    0.86
  -3   0  -6   10.69    0.82
   3   0   6   12.30    0.85
  -3   0  -7    0.13    0.39
   3   0   8    3.94    0.56
  -3   0  -8    3.51    0.50
  -3   0  -8    3.70    0.50
  -3   0  -9   42.95    1.37
   3   0   9   44.24    1.43
  -3   0 -10    0.63    0.17
   3   0  10    1.04    0.26
  -3   0 -10    0.54    0.17
  -3  -1  13   10.11    0.49
   3   1 -13    9.00    0.46
  -3  -1  12   17.78    0.84
  -3  -1  11   26.17    1.21
  -3  -1  11   26.11    1.14
  -3  -1  10    4.26    0.56
  -3  -1  10    4.14    0.56
  -3  -1  10    4.16    0.58
  -3  -1   9    9.67    0.82
  -3  -1   9    8.84    0.69
   3   1  -9    9.48    0.63
  -3  -1   9    8.52    0.74
  -3  -1   9    8.90    0.80
  -3  -1   8   30.66    1.32
  -3  -1   7    9.92    0.71
  -3  -1   6    2.67    0.37
  -3  -1   5  109.79    1.91
  -3  -1   4   12.98    0.62
  -3  -1   3   65.23    1.27
  -3  -1   2  102.46    1.54
   3   1  -1   35.65    0.82
   3   1   0    4.21    0.31
   3   1   1    6.23    0.38
   3   1   2    7.43    0.45
  -3  -1  -3   30.72    0.99
   3   1   3   29.76    0.93
   3   1   4   18.11    0.80
  -3  -1  -4   18.10    0.83
   3   1   5   23.32    1.10
   3   1   6    3.84    0.50
   3   1   6    3.43    0.46
  -3  -1  -6    2.84    0.50
   3   1   6    3.40    0.44
   3   1   7   37.67    1.52
  -3  -1  -7   38.06    1.55
   3   1   8    0.06    0.22
  -3  -1  -8    0.09    0.32
  -3  -1  -8   -0.03    0.10
   3   1   9   31.00    1.16
  -3  -1  -9   31.29    1.20
  -3  -1 -10    2.18    0.27
   3   1  10    2.16    0.27
  -3  -2  13    2.38    0.27
   3   2 -12    2.11    0.30
  -3  -2  12    1.99    0.34
  -3  -2  11    8.96    0.72
  -3  -2  11    8.73    0.68
  -3  -2  10   20.92    1.07
  -3  -2  10   22.30    1.12
  -3  -2   9   11.14    0.85
   3   2  -9   10.09    0.68
  -3  -2   9   10.72    0.80
  -3  -2   9   11.58    0.81
  -3  -2   9    9.55    0.78
  -3  -2   8  240.27    3.63
  -3  -2   7    1.16    0.31
  -3  -2   6   90.96    1.93
  -3  -2   5   69.08    1.54
  -3  -2   4   64.53    1.39
  -3  -2   3  213.14    2.38
  -3  -2   2  146.55    1.93
   3   2  -1  441.35    3.18
   3   2   0   84.16    1.47
   3   2   1    1.47    0.24
   3   2   2   57.06    1.32
  -3  -2  -3   10.80    0.59
   3   2   3   11.44    0.64
   3   2   4    1.50    0.27
  -3  -2  -4    1.71    0.29
   3   2   5   34.05    1.35
   3   2   5   31.65    1.30
  -3  -2  -5   35.07    1.40
   3   2   5   31.18    1.28
   3   2   6    0.26    0.27
  -3  -2  -6   -0.05    0.09
   3   2   6   -0.15    0.18
  -3  -2  -7   14.16    0.98
   3   2   7   13.75    0.88
   3   2   7   12.79    0.89
   3   2   8    0.27    0.31
  -3  -2  -8    0.41    0.32
   3   2   9    7.07    0.55
  -3  -2  -9    7.44    0.59
  -3  -2 -10    0.01    0.14
  -3  -3  13   14.26    0.57
  -3  -3  12   33.85    1.13
  -3  -3  11    1.62    0.33
  -3  -3  11    1.94    0.40
  -3  -3  10   57.45    1.78
  -3  -3  10   57.11    1.71
   3   3  -9    5.36    0.49
  -3  -3   9    5.15    0.55
  -3  -3   8  119.92    2.52
   3   3  -8  119.66    2.05
  -3  -3   8  122.21    2.41
  -3  -3   7   46.80    1.49
  -3  -3   6   15.14    0.80
  -3  -3   5  105.68    1.95
  -3  -3   4    0.66    0.22
  -3  -3   3  326.83    3.08
   3   3  -2   79.60    1.50
   3   3  -1   76.32    1.49
   3   3   0   92.44    1.70
   3   3   1   20.53    0.83
   3   3   2  114.45    2.04
   3   3   3   65.37    1.61
   3   3   4   79.38    1.87
   3   3   5   20.84    0.99
   3   3   5   19.93    1.07
   3   3   5   19.81    1.09
   3   3   5   20.09    0.96
   3   3   5   19.27    1.06
  -3  -3  -5   20.88    1.12
  -3  -3  -6    4.18    0.55
   3   3   6    3.62    0.46
   3   3   6    3.09    0.50
   3   3   6    3.57    0.51
   3   3   7    6.37    0.52
   3   3   7    5.56    0.62
  -3  -3  -7    6.13    0.65
   3   3   7    5.58    0.60
  -3  -3  -8    2.60    0.44
   3   3   8    4.55    0.49
  -3  -3  -9    0.49    0.18
  -3  -3 -10    0.00    0.10
  -3  -4  13    0.10    0.11
  -3  -4  12   25.47    0.93
  -3  -4  11    0.20    0.24
  -3  -4  11    0.19    0.10
  -3  -4  10    7.83    0.62
  -3  -4  10    7.06    0.65
   3   4 -10    6.63    0.59
  -3  -4   9    6.26    0.56
   3   4  -9    6.00    0.54
   3   4  -8   37.77    1.21
  -3  -4   8   37.70    1.35
   3   4  -7   54.53    1.60
   3   4  -7   52.19    1.36
  -3  -4   6    6.79    0.56
  -3  -4   5   27.85    1.02
  -3  -4   4   25.41    0.92
   3   4  -4   24.77    0.97
   3   4  -3   30.95    1.05
   3   4  -2   24.68    0.93
   3   4  -2   23.55    0.72
   3   4  -1    4.89    0.45
   3   4   0   12.43    0.70
   3   4   1   77.48    1.75
   3   4   2   11.34    0.71
   3   4   3  148.96    2.59
   3   4   4    7.09    0.67
   3   4   4    8.82    0.76
   3   4   4    6.62    0.60
  -3  -4  -4    7.36    0.67
   3   4   4    7.98    0.66
   3   4   4    7.43    0.63
   3   4   5    8.19    0.72
   3   4   5    7.33    0.65
  -3  -4  -5    8.19    0.74
   3   4   5    8.46    0.76
  -3  -4  -6   21.62    1.16
   3   4   6   21.68    1.05
   3   4   6   19.82    1.05
   3   4   6   21.13    1.14
  -3  -4  -7    5.09    0.59
   3   4   7    4.95    0.51
  -3  -4  -8    8.41    0.63
   3   4   8    6.84    0.45
  -3  -4  -9    0.76    0.20
  -3  -5  12   11.80    0.56
  -3  -5  11    3.50    0.41
  -3  -5  10    6.72    0.59
   3   5 -10    5.84    0.52
   3   5  -9   28.81    1.10
  -3  -5   9   29.87    1.28
   3   5  -8   10.22    0.68
   3   5  -7  112.33    2.41
   3   5  -7  106.94    2.09
   3   5  -6   -0.35    0.24
   3   5  -6    0.15    0.24
   3   5  -6    0.42    0.24
   3   5  -5   17.07    0.88
   3   5  -4   24.93    1.03
   3   5  -3   19.86    0.83
   3   5  -3   20.86    0.94
   3   5  -2   46.91    1.40
   3   5  -1    3.92    0.43
   3   5   0   22.28    0.98
   3   5   1   82.15    1.93
   3   5   2    0.74    0.27
   3   5   2    0.80    0.34
  -3  -5  -3   52.02    1.56
   3   5   3   53.36    1.66
   3   5   3   53.42    1.76
   3   5   3   54.05    1.62
   3   5   4    7.66    0.68
   3   5   4    7.53    0.74
  -3  -5  -4    7.05    0.63
   3   5   5    0.05    0.22
  -3  -5  -5    0.00    0.22
   3   5   5   -0.04    0.29
   3   5   6   66.73    1.81
  -3  -5  -6   66.41    1.87
  -3  -5  -7    0.31    0.22
   3   5   7    0.16    0.20
  -3  -5  -8   29.13    0.95
   3   5   9    3.22    0.23
  -3  -6  12   16.20    0.50
  -3  -6  11    1.92    0.30
  -3  -6  10    0.65    0.21
   3   6 -10    0.37    0.21
  -3  -6   9    1.75    0.37
   3   6  -9    2.36    0.37
   3   6  -8    0.53    0.26
   3   6  -7   26.73    1.23
   3   6  -7   28.22    1.14
   3   6  -6    5.52    0.58
   3   6  -6    4.61    0.53
   3   6  -5    3.40    0.45
   3   6  -5    2.85    0.38
   3   6  -5    3.45    0.44
   3   6  -4  112.37    2.25
   3   6  -4   99.37    2.13
   3   6  -4  111.35    2.15
   3   6  -4   97.90    2.09
   3   6  -3   10.01    0.71
   3   6  -2    2.60    0.39
   3   6  -1   27.09    1.12
   3   6   0    0.91    0.25
   3   6   0    0.73    0.27
   3   6   0    0.34    0.26
   3   6   1   13.29    0.82
   3   6   1   11.82    0.83
   3   6   1   13.29    0.82
   3   6   2   11.20    0.80
   3   6   2   10.73    0.77
   3   6   3    0.98    0.38
   3   6   4    0.28    0.19
   3   6   5   12.22    0.83
  -3  -6  -5   12.40    0.75
   3   6   6    3.45    0.46
  -3  -6  -6    3.37    0.39
   3   6   7    9.15    0.57
  -3  -6  -7    8.49    0.50
   3   6   8    0.71    0.16
  -3  -7  11    1.27    0.16
   3   7 -11    1.71    0.22
  -3  -7  10    1.33    0.24
   3   7 -10    1.18    0.24
  -3  -7   9    0.13    0.12
   3   7  -9    0.09    0.19
  -3  -7   8    0.06    0.15
   3   7  -8    0.34    0.24
   3   7  -7    2.76    0.45
   3   7  -6    3.32    0.47
   3   7  -6    4.04    0.50
   3   7  -5   29.58    1.26
   3   7  -5   31.18    1.20
   3   7  -4   13.25    0.82
   3   7  -4   13.45    0.88
   3   7  -3   14.13    0.86
   3   7  -3   13.90    0.84
   3   7  -2    0.64    0.26
   3   7  -2    0.74    0.28
   3   7  -1   11.03    0.81
   3   7  -1   10.00    0.74
   3   7  -1   11.15    0.79
   3   7   0    0.98    0.39
   3   7   0    1.53    0.37
   3   7   0    1.17    0.29
   3   7   1   29.03    1.26
   3   7   1   30.58    1.38
   3   7   2   15.38    0.94
   3   7   2   15.95    1.02
   3   7   3    1.71    0.41
   3   7   3    1.15    0.34
   3   7   4    1.47    0.41
   3   7   4    1.30    0.38
   3   7   5   20.60    0.99
   3   7   5   19.06    0.98
   3   7   6    2.44    0.35
   3   7   6    2.25    0.35
   3   7   7    6.82    0.40
   3   8 -10   34.94    0.81
   3   8  -9    7.90    0.47
  -3  -8   8   39.07    1.07
   3   8  -8   46.44    1.23
   3   8  -7    0.64    0.27
   3   8  -6    1.67    0.36
   3   8  -6    0.87    0.30
   3   8  -5   23.98    1.10
   3   8  -5   25.39    1.09
   3   8  -4    9.31    0.71
   3   8  -4   11.28    0.77
   3   8  -3   49.59    1.54
   3   8  -3   51.26    1.61
   3   8  -2    2.20    0.42
   3   8  -2    1.34    0.41
   3   8  -1    9.66    0.72
   3   8  -1   10.52    0.81
   3   8   0   12.97    0.80
   3   8   0   14.33    0.90
   3   8   1   13.44    0.90
   3   8   1   12.06    0.78
   3   8   2   18.75    0.91
   3   8   2   23.25    1.16
   3   8   3    2.32    0.40
   3   8   3    2.22    0.31
   3   8   3    1.92    0.43
   3   8   4   13.42    0.77
   3   8   5   12.37    0.66
   3   8   6    6.06    0.36
   3   9  -9    2.83    0.25
   3   9  -8   14.70    0.58
   3   9  -7   27.23    0.88
   3   9  -6    1.35    0.29
   3   9  -5   42.78    1.24
   3   9  -5   46.40    1.32
   3   9  -4    0.35    0.16
   3   9  -4    0.03    0.20
   3   9  -3   10.92    0.65
   3   9  -3   12.50    0.80
   3   9  -2   10.06    0.64
   3   9  -2   12.19    0.78
   3   9  -1   12.03    0.67
   3   9  -1   13.59    0.84
   3   9   0   10.45    0.73
   3   9   1    4.98    0.51
   3   9   2    7.48    0.59
   3   9   3    5.08    0.44
   3   9   4    3.67    0.33
   3   9   5    2.09    0.20
   3  10  -7   34.16    0.72
   3  10  -6   10.29    0.48
   3  10  -5   15.38    0.64
   3  10  -4    5.77    0.44
   3  10  -3    0.27    0.19
   3  10  -2    4.81    0.43
   3  10  -1   18.75    0.79
   3  10   0    3.94    0.27
   3  10   0    6.50    0.47
   3  10   1    7.10    0.45
   3  10   1    3.05    0.24
   3  10   2    0.45    0.15
   3  10   3    2.46    0.20
   3  11  -4    2.45    0.20
   3  11  -3    0.03    0.13
   3  11  -2   12.25    0.44
   3  11  -1   14.01    0.44
  -4  11   5    0.54    0.13
  -4  11   4    0.72    0.13
  -4  11   4    0.73    0.17
  -4  11   3    5.56    0.34
  -4  11   3    5.61    0.37
  -4  11   2   -0.01    0.13
  -4  11   2    0.33    0.16
  -4  11   2    0.14    0.14
  -4  11   2    0.10    0.15
  -4  11   2    0.26    0.11
  -4  11   1    3.80    0.32
  -4  11   1    3.70    0.33
  -4  11   1    2.96    0.26
  -4  11   1    3.35    0.28
  -4  11   0    0.37    0.17
  -4  11   0    0.36    0.17
  -4  11  -1   12.02    0.52
  -4  11  -1   12.42    0.50
  -4  11  -2    5.83    0.35
  -4  11  -2    6.41    0.36
  -4  11  -3    1.62    0.19
  -4  10   7    0.39    0.12
  -4  10   6    7.29    0.46
  -4  10   5   12.63    0.50
  -4  10   5   10.99    0.60
  -4  10   4    0.51    0.22
  -4  10   4    0.35    0.21
  -4  10   4    0.41    0.20
  -4  10   4    0.40    0.19
  -4  10   4    0.45    0.17
  -4  10   3    0.59    0.23
  -4  10   3    0.78    0.26
  -4  10   3    1.04    0.22
  -4  10   3    1.18    0.27
  -4  10   3    0.59    0.23
  -4  10   2    0.43    0.23
  -4  10   2    0.39    0.17
  -4  10   2    0.31    0.21
  -4  10   2    0.39    0.22
  -4  10   2    0.42    0.17
  -4  10   1    3.95    0.44
  -4  10   1    4.12    0.41
  -4  10   1    4.11    0.45
  -4  10   1    4.16    0.39
  -4  10   1    3.80    0.38
  -4  10   0    0.13    0.22
  -4  10   0    0.12    0.20
  -4  10   0    0.28    0.22
  -4  10   0    0.34    0.22
  -4  10  -1    1.93    0.34
  -4  10  -1    1.64    0.26
  -4  10  -1    1.83    0.32
  -4  10  -2    0.67    0.25
  -4  10  -2    0.89    0.26
  -4  10  -3    2.43    0.33
  -4  10  -3    3.24    0.36
  -4  10  -3    3.14    0.32
  -4  10  -4    1.87    0.26
  -4  10  -4    2.43    0.28
  -4  10  -5    2.43    0.22
  -4   9   9    7.00    0.35
  -4   9   8    0.32    0.16
  -4   9   7    4.70    0.46
  -4   9   7    3.43    0.40
  -4   9   6    7.77    0.43
  -4   9   6    8.31    0.62
  -4   9   6    7.52    0.62
  -4   9   6    6.86    0.57
  -4   9   5   32.59    1.07
  -4   9   5   33.29    1.00
  -4   9   5   33.91    1.22
  -4   9   5   33.26    1.27
  -4   9   4    1.68    0.36
  -4   9   4    2.17    0.33
  -4   9   4    2.02    0.42
  -4   9   4    2.15    0.41
  -4   9   4    1.53    0.37
  -4   9   3   15.64    0.90
  -4   9   3   17.38    0.84
  -4   9   3   18.03    0.83
  -4   9   3   17.91    1.00
  -4   9   3   15.88    0.87
  -4   9   2    7.51    0.62
  -4   9   2    7.58    0.57
  -4   9   2    6.87    0.57
  -4   9   2    7.22    0.62
  -4   9   2    7.45    0.51
  -4   9   2    7.44    0.70
  -4   9   1   10.16    0.74
  -4   9   1   10.56    0.66
  -4   9   1    9.57    0.77
  -4   9   1    9.66    0.62
  -4   9   1   10.24    0.68
  -4   9   0   30.47    1.21
  -4   9   0   32.13    1.10
  -4   9   0   31.75    1.13
  -4   9   0   30.74    1.06
  -4   9   0   27.76    1.23
  -4   9   0   32.86    1.31
  -4   9  -1    2.02    0.37
  -4   9  -1    1.72    0.39
  -4   9  -1    2.25    0.37
  -4   9  -1    2.53    0.45
  -4   9  -2    5.81    0.56
  -4   9  -2    6.15    0.59
  -4   9  -2    6.78    0.54
  -4   9  -2    6.87    0.62
  -4   9  -3   12.39    0.67
  -4   9  -3   12.18    0.77
  -4   9  -3   12.40    0.78
  -4   9  -4    3.11    0.42
  -4   9  -4    3.08    0.39
  -4   9  -4    3.26    0.35
  -4   9  -5   26.73    0.93
  -4   9  -5   28.30    0.94
  -4   9  -6    0.50    0.16
  -4   8  10   13.30    0.51
  -4   8   9    5.75    0.46
  -4   8   8    2.26    0.35
  -4   8   8    1.62    0.33
  -4   8   7   25.50    1.13
  -4   8   7   20.00    1.05
  -4   8   6    1.87    0.39
  -4   8   6    2.02    0.45
  -4   8   6    1.33    0.36
  -4   8   5   80.91    1.81
  -4   8   5   85.64    1.71
  -4   8   5   86.06    2.25
  -4   8   5   85.60    2.07
  -4   8   4   76.57    1.76
  -4   8   4   77.13    2.09
  -4   8   4   79.66    1.72
  -4   8   4   75.23    2.10
  -4   8   4   73.98    2.02
  -4   8   3    9.98    0.70
  -4   8   3   10.81    0.86
  -4   8   3    9.19    0.77
  -4   8   3   10.27    0.77
  -4   8   3    9.82    0.79
  -4   8   3   10.42    0.68
  -4   8   2   27.43    1.13
  -4   8   2   27.48    1.22
  -4   8   2   28.29    1.07
  -4   8   2   28.14    1.23
  -4   8   2   26.79    1.13
  -4   8   2   26.53    0.93
  -4   8   2   28.69    1.33
  -4   8   1   19.98    0.99
  -4   8   1   21.73    0.93
  -4   8   1   19.03    0.98
  -4   8   1   19.62    0.85
  -4   8   1   20.66    1.07
  -4   8   1   19.52    0.93
  -4   8   1   20.29    1.14
  -4   8   0   45.00    1.35
  -4   8   0   45.07    1.32
  -4   8   0   42.93    1.27
  -4   8   0   44.48    1.57
  -4   8   0   43.04    1.66
  -4   8  -1   28.15    1.08
  -4   8  -1   29.88    1.03
  -4   8  -1   26.87    1.04
  -4   8  -1   27.51    1.25
  -4   8  -1   25.39    1.25
  -4   8  -1   27.83    1.24
  -4   8  -2    0.67    0.38
  -4   8  -2    0.81    0.30
  -4   8  -2    0.82    0.37
  -4   8  -2    1.02    0.33
  -4   8  -2    0.81    0.34
  -4   8  -3   53.78    1.41
  -4   8  -3   54.26    1.74
  -4   8  -3   55.92    1.73
  -4   8  -4    0.16    0.29
  -4   8  -4    0.42    0.24
  -4   8  -4    0.51    0.28
  -4   8  -5   18.97    0.89
  -4   8  -5   18.69    0.95
  -4   8  -6    3.57    0.41
  -4   8  -6    3.76    0.36
  -4   8  -7    1.07    0.21
  -4   7  11    0.35    0.11
  -4   7  11    0.47    0.10
  -4   7  10   14.69    0.66
  -4   7   9   14.35    0.72
  -4   7   9   12.20    0.73
  -4   7   8    3.16    0.44
  -4   7   8    3.43    0.51
  -4   7   8    2.99    0.44
  -4   7   7   14.29    0.84
  -4   7   7   13.63    0.92
  -4   7   7   14.08    0.90
  -4   7   6    1.82    0.37
  -4   7   6    1.55    0.38
  -4   7   6    1.12    0.39
  -4   7   6    1.82    0.42
  -4   7   5   11.19    0.73
  -4   7   5   10.40    0.79
  -4   7   5   12.21    0.89
  -4   7   5   10.21    0.79
  -4   7   4    0.35    0.30
  -4   7   4    0.79    0.32
  -4   7   4    0.53    0.29
  -4   7   4    0.27    0.22
  -4   7   4    0.03    0.30
  -4   7   4    0.52    0.18
  -4   7   3    0.36    0.25
  -4   7   3    0.63    0.19
  -4   7   3    0.51    0.28
  -4   7   3    0.46    0.25
  -4   7   3   -0.12    0.19
  -4   7   3    0.27    0.24
  -4   7   3    0.86    0.23
  -4   7   2    2.79    0.36
  -4   7   2    2.50    0.43
  -4   7   2    2.55    0.49
  -4   7   2    2.42    0.36
  -4   7   2    2.42    0.33
  -4   7   2    1.88    0.42
  -4   7   2    2.84    0.41
  -4   7   2    1.93    0.45
  -4   7   2    2.63    0.46
  -4   7   2    2.81    0.38
  -4   7   1   10.11    0.68
  -4   7   1   10.92    0.65
  -4   7   1   10.72    0.68
  -4   7   1   11.56    0.64
  -4   7   1   11.31    0.84
  -4   7   1    9.21    0.74
  -4   7   1   10.12    0.75
  -4   7   0   42.03    1.36
  -4   7   0   42.54    1.26
  -4   7   0   42.19    1.61
  -4   7   0   41.02    1.20
  -4   7   0   40.37    1.39
  -4   7   0   41.51    1.46
  -4   7   0   41.13    1.19
  -4   7   0   44.36    1.46
  -4   7  -1    3.08    0.41
  -4   7  -1    3.08    0.40
  -4   7  -1    3.42    0.45
  -4   7  -1    3.31    0.50
  -4   7  -1    2.69    0.48
  -4   7  -1    3.09    0.49
  -4   7  -2    0.33    0.26
  -4   7  -2    0.41    0.29
  -4   7  -2    0.34    0.29
  -4   7  -2    0.77    0.29
  -4   7  -3   16.61    0.83
  -4   7  -3   17.26    1.04
  -4   7  -3   17.79    1.02
  -4   7  -4    3.58    0.44
  -4   7  -4    4.11    0.59
  -4   7  -4    4.23    0.53
  -4   7  -5    0.76    0.33
  -4   7  -5    0.77    0.30
  -4   7  -6   12.79    0.82
  -4   7  -6   13.36    0.72
  -4   7  -7    1.92    0.32
  -4   7  -7    1.57    0.21
  -4   7  -8    0.99    0.20
  -4   6  11   15.36    0.71
  -4   6  10   17.07    0.93
  -4   6  10   15.83    0.88
  -4   6   9   16.60    0.83
  -4   6   9   18.23    1.06
  -4   6   9   15.96    0.95
  -4   6   8    3.09    0.44
  -4   6   8    2.36    0.46
  -4   6   8    2.40    0.45
  -4   6   7   90.78    1.98
  -4   6   7   92.03    2.25
  -4   6   7   87.31    2.35
  -4   6   6    2.97    0.46
  -4   6   6    2.65    0.48
  -4   6   6    2.86    0.51
  -4   6   6    2.70    0.42
  -4   6   6    2.72    0.39
  -4   6   5    3.62    0.48
  -4   6   5    3.79    0.51
  -4   6   5    3.60    0.49
  -4   6   5    4.14    0.47
  -4   6   5    4.17    0.54
  -4   6   5    4.17    0.46
  -4   6   4    6.56    0.56
  -4   6   3   34.72    1.20
  -4   6   2   41.54    1.23
  -4   6   2   41.75    1.25
  -4   6   1  179.79    2.59
  -4   6   1  187.76    2.59
  -4   6   0    4.47    0.45
  -4   6  -1    3.69    0.42
  -4   6  -1    3.01    0.38
  -4   6  -1    3.03    0.37
  -4   6  -1    3.51    0.48
  -4   6  -2    0.32    0.24
  -4   6  -2    0.13    0.08
  -4   6  -2    0.38    0.25
  -4   6  -2   -0.16    0.19
  -4   6  -2    0.23    0.27
  -4   6  -3    4.65    0.48
  -4   6  -3    4.75    0.55
  -4   6  -3    4.90    0.56
  -4   6  -4   24.75    0.96
  -4   6  -4   23.39    1.21
  -4   6  -4   25.01    1.17
  -4   6  -5    0.37    0.29
  -4   6  -5    0.00    0.23
  -4   6  -6    3.33    0.45
  -4   6  -6    4.13    0.56
  -4   6  -7   17.12    0.90
  -4   6  -7   15.53    0.68
  -4   6  -8    1.04    0.23
  -4   5  12    2.47    0.31
  -4   5  11   33.37    1.23
  -4   5  10    3.63    0.51
  -4   5  10    4.28    0.55
  -4   5   9    4.54    0.46
  -4   5   9    4.50    0.56
  -4   5   9    4.67    0.59
  -4   5   8    3.48    0.47
  -4   5   8    3.83    0.58
  -4   5   8    4.54    0.57
  -4   5   7   41.78    1.28
  -4   5   7   40.50    1.46
  -4   5   7   38.70    1.39
  -4   5   6   56.50    1.45
  -4   5   6   57.79    1.64
  -4   5   6   60.02    1.78
  -4   5   6   56.68    1.61
  -4   5   5   39.10    1.29
  -4   5   4   17.10    0.81
  -4   5   3   64.36    1.49
  -4   5   2   31.62    1.00
  -4   5   2   34.75    1.04
  -4   5   1  207.23    2.54
  -4   5   1  213.10    2.49
  -4   5   0   11.07    0.61
  -4   5   0    9.74    0.54
  -4   5  -1    1.48    0.29
  -4   5  -2   60.38    1.49
  -4   5  -2   56.89    1.68
  -4   5  -3    4.38    0.45
  -4   5  -3    4.13    0.56
  -4   5  -3    4.92    0.59
  -4   5  -3    4.50    0.48
  -4   5  -4   82.14    2.24
  -4   5  -4   77.77    1.64
  -4   5  -4   80.11    2.18
  -4   5  -4   81.27    1.98
  -4   5  -5    1.50    0.45
  -4   5  -5    1.75    0.42
  -4   5  -5    1.12    0.30
  -4   5  -6    6.52    0.72
  -4   5  -6    5.04    0.52
  -4   5  -6    5.56    0.65
  -4   5  -7    9.52    0.75
  -4   5  -8    9.07    0.61
  -4   5  -9    3.47    0.30
  -4   4  13    4.32    0.29
  -4   4  12    0.53    0.19
  -4   4  11   14.81    0.85
  -4   4  11   14.51    0.90
  -4   4  10    4.79    0.57
  -4   4  10    4.40    0.64
  -4   4   9    1.34    0.34
  -4   4   9    1.63    0.40
  -4   4   8   12.71    0.80
  -4   4   8   11.73    0.89
  -4   4   8   12.48    0.79
  -4   4   7    1.82    0.35
  -4   4   6   58.85    1.55
  -4   4   5   16.68    0.78
  -4   4   4   10.18    0.57
  -4   4   3   15.07    0.65
  -4   4   2   48.98    1.11
  -4   4   2   50.05    1.11
  -4   4   1   51.25    1.14
  -4   4   1   53.94    1.12
  -4   4   1   51.69    1.15
  -4   4   0   51.28    1.16
  -4   4   0   51.52    1.27
  -4   4  -1   25.10    0.85
  -4   4  -1   23.92    0.94
  -4   4  -1   25.34    0.99
  -4   4  -2   47.14    1.19
  -4   4  -2   46.64    1.40
  -4   4  -2   47.55    1.44
  -4   4  -3    8.09    0.66
  -4   4  -4   56.05    1.78
  -4   4  -4   57.77    1.76
  -4   4  -5   11.58    0.89
  -4   4  -5   11.60    0.86
  -4   4  -6    0.21    0.30
  -4   4  -6   -0.20    0.35
   4  -4   7   17.48    0.86
  -4   4  -7   18.60    1.03
   4  -4   8    0.93    0.19
  -4   4  -8    1.38    0.33
   4  -4   9   15.93    0.53
  -4   4  -9   17.44    0.69
  -4   3  13    2.39    0.25
  -4   3  12   15.99    0.84
  -4   3  11    7.00    0.60
  -4   3  11    7.23    0.70
  -4   3  10    5.64    0.63
  -4   3   9   85.39    2.15
  -4   3   9   84.79    2.35
  -4   3   8   15.99    0.95
  -4   3   8   14.77    0.89
  -4   3   8   14.70    1.00
  -4   3   7   53.18    1.60
  -4   3   6   30.31    1.11
  -4   3   5   28.97    0.98
  -4   3   5   28.90    0.91
  -4   3   5   29.32    0.93
  -4   3   4   23.20    0.82
  -4   3   4   22.52    0.80
  -4   3   4   25.29    0.79
  -4   3   3  110.63    1.77
  -4   3   3  114.82    1.57
  -4   3   3  113.60    1.67
  -4   3   2   16.56    0.72
  -4   3   2   18.66    0.59
  -4   3   1   26.69    0.72
  -4   3   1   27.33    0.91
  -4   3   0  195.49    1.96
  -4   3   0  193.87    2.39
  -4   3  -1   13.85    0.54
  -4   3  -1   14.38    0.65
  -4   3  -1   14.80    0.73
  -4   3  -1   13.85    0.65
  -4   3  -2   56.15    1.41
  -4   3  -2   56.48    1.55
  -4   3  -3  159.76    2.59
  -4   3  -3  161.53    2.79
  -4   3  -4   25.75    1.15
  -4   3  -5   94.82    2.31
  -4   3  -5   93.05    2.29
  -4   3  -6   38.37    1.51
  -4   3  -6   37.30    1.50
   4  -3   7  104.16    2.22
  -4   3  -7   97.02    2.31
  -4   3  -7  102.20    2.39
   4  -3   8   32.95    1.14
  -4   3  -8   32.18    1.21
   4  -3   9    3.05    0.30
  -4   3  -9    3.23    0.35
  -4   2  13   19.73    0.72
  -4   2  12    4.45    0.39
  -4   2  12    4.79    0.50
  -4   2  11    1.87    0.38
  -4   2  11    3.01    0.46
  -4   2  10    0.38    0.22
  -4   2  10   -0.02    0.30
  -4   2  10    0.54    0.33
  -4   2   9   27.36    1.31
  -4   2   9   26.79    1.25
  -4   2   9   27.94    1.37
  -4   2   8    2.00    0.38
  -4   2   8    1.76    0.41
  -4   2   7  164.71    2.81
  -4   2   6   23.31    0.99
  -4   2   6   23.23    0.73
  -4   2   5   46.34    1.27
  -4   2   5   45.36    1.06
  -4   2   4  218.19    2.31
  -4   2   4  213.28    2.51
  -4   2   4  216.25    2.02
  -4   2   3   21.11    0.74
  -4   2   3   22.49    0.59
  -4   2   3   22.55    0.78
  -4   2   2   58.79    0.84
  -4   2   2   57.72    1.20
   4  -2  -1    8.39    0.31
  -4   2   1    8.69    0.50
  -4   2   0    1.43    0.17
  -4   2   0    1.33    0.18
  -4   2   0    1.37    0.25
  -4   2  -1    1.69    0.23
  -4   2  -1    1.96    0.27
  -4   2  -2   33.14    0.99
  -4   2  -2   35.57    1.19
  -4   2  -2   33.35    0.92
  -4   2  -3   92.55    1.87
  -4   2  -3   91.31    2.06
  -4   2  -4    0.73    0.30
  -4   2  -4    0.58    0.26
   4  -2   4    0.42    0.24
  -4   2  -5    5.42    0.61
   4  -2   5    4.08    0.46
  -4   2  -5    4.76    0.51
  -4   2  -6   11.08    0.84
  -4   2  -6   11.08    0.82
   4  -2   7   18.26    0.99
  -4   2  -7   18.89    1.03
  -4   2  -7   16.31    1.01
   4  -2   8   20.57    0.99
  -4   2  -8   19.89    0.95
   4  -2   9    2.53    0.32
  -4   2  -9    1.76    0.27
  -4   1  13    9.51    0.50
  -4   1  12   27.24    1.12
  -4   1  11   17.19    0.86
  -4   1  11   18.64    1.04
  -4   1  10    8.85    0.77
  -4   1  10    7.49    0.75
  -4   1   9   13.31    0.95
  -4   1   9   13.02    0.91
  -4   1   9   13.18    0.96
  -4   1   8    1.45    0.37
  -4   1   7   67.57    1.82
  -4   1   6    1.14    0.29
  -4   1   6    1.20    0.20
  -4   1   5   72.47    1.60
  -4   1   4   71.61    1.51
  -4   1   3    4.15    0.38
  -4   1   3    4.01    0.20
  -4   1   2  101.00    1.65
   4  -1  -1  135.59    1.44
   4  -1   0    0.24    0.09
  -4   1   0    0.32    0.16
  -4   1  -1    9.29    0.44
  -4   1  -1    9.71    0.48
   4  -1   1    8.79    0.40
  -4   1  -2    0.13    0.18
   4  -1   2    0.28    0.08
  -4   1  -2    0.26    0.13
  -4   1  -3   43.03    1.40
  -4   1  -4   28.63    1.20
   4  -1   5    2.42    0.42
  -4   1  -5    2.02    0.39
  -4   1  -5    2.95    0.40
   4  -1   6    1.43    0.36
  -4   1  -6    1.02    0.37
  -4   1  -6    1.59    0.36
   4  -1   7    2.21    0.41
  -4   1  -7    1.42    0.38
  -4   1  -7    2.76    0.49
  -4   1  -7    1.62    0.38
   4  -1   8    6.86    0.60
  -4   1  -8    8.96    0.62
  -4   1  -8    8.34    0.60
   4  -1   9    4.12    0.39
  -4   1  -9    3.16    0.32
  -4   1  -9    3.47    0.31
   4   0 -13    7.23    0.42
  -4   0  13    6.42    0.39
  -4   0  12    9.18    0.56
  -4   0  12    9.52    0.63
  -4   0  11   95.13    2.01
  -4   0  11   93.15    2.31
  -4   0  10    4.32    0.51
  -4   0  10    3.36    0.50
  -4   0  10    3.08    0.51
  -4   0   9   73.41    2.14
  -4   0   9   68.96    1.96
  -4   0   9   66.33    1.71
  -4   0   9   66.60    2.08
  -4   0   8    1.02    0.31
  -4   0   7   36.27    1.35
  -4   0   6    1.58    0.31
  -4   0   5   31.77    1.10
  -4   0   4   25.91    0.94
  -4   0   3   65.77    1.42
  -4   0   2   24.66    0.87
   4   0  -1  172.76    1.87
   4   0   0   15.62    0.60
   4   0   1    0.80    0.18
   4   0   2    2.90    0.29
  -4   0  -3   29.41    1.13
   4   0   3   29.14    0.92
  -4   0  -4   38.07    1.37
   4   0   5    7.72    0.68
   4   0   5    7.67    0.68
  -4   0  -5    7.63    0.71
   4   0   6    0.30    0.28
  -4   0  -6    0.08    0.32
  -4   0  -6    0.02    0.22
   4   0   7    7.91    0.72
  -4   0  -7    7.57    0.60
  -4   0  -7    7.28    0.66
   4   0   8    1.09    0.33
  -4   0  -8    0.76    0.29
  -4   0  -8    0.98    0.22
   4   0   9   20.58    0.83
  -4   0  -9   21.48    0.77
  -4  -1  13    5.22    0.37
  -4  -1  12    0.61    0.17
  -4  -1  12    0.65    0.24
  -4  -1  12    0.69    0.31
  -4  -1  11   23.02    1.06
  -4  -1  11   22.08    1.15
  -4  -1  10    0.39    0.25
  -4  -1  10   -0.09    0.12
  -4  -1  10   -0.07    0.26
  -4  -1   9   39.94    1.58
  -4  -1   9   36.44    1.46
  -4  -1   9   36.84    1.53
  -4  -1   8   55.97    1.79
  -4  -1   7   -0.02    0.18
  -4  -1   6  108.55    2.19
  -4  -1   5    6.58    0.54
  -4  -1   4  102.12    1.89
  -4  -1   3   31.49    1.04
   4   1  -2   40.32    1.03
   4   1  -1    3.28    0.32
   4   1   0   54.67    1.23
   4   1   1   26.61    0.88
   4   1   2   35.31    1.05
  -4  -1  -3    2.91    0.38
   4   1   3    2.71    0.33
   4   1   4   28.93    1.07
  -4  -1  -4   28.66    1.25
  -4  -1  -4   29.75    1.18
   4   1   4   30.70    1.25
   4   1   5    6.14    0.67
   4   1   5    6.02    0.66
  -4  -1  -5    5.74    0.63
   4   1   6   22.13    1.17
  -4  -1  -6   21.21    1.17
   4   1   7   18.26    1.04
  -4  -1  -7   17.75    1.04
   4   1   8    5.08    0.54
  -4  -1  -8    5.10    0.52
  -4  -1  -9    3.67    0.36
   4   1   9    3.69    0.37
  -4  -2  13   24.94    0.77
  -4  -2  12    3.16    0.41
  -4  -2  12    2.85    0.40
  -4  -2  11    5.87    0.58
  -4  -2  11    5.22    0.58
  -4  -2  10   18.80    1.02
  -4  -2  10   20.31    1.10
  -4  -2  10   18.96    1.09
   4   2  -9    0.60    0.21
  -4  -2   9    0.38    0.24
  -4  -2   9    1.12    0.27
  -4  -2   8  190.24    3.29
  -4  -2   8  181.91    3.02
  -4  -2   7  128.83    2.58
  -4  -2   6   15.25    0.86
  -4  -2   5   52.45    1.48
  -4  -2   4    0.62    0.23
  -4  -2   3  139.65    2.23
   4   2  -2  109.23    1.81
   4   2  -1    1.99    0.31
   4   2   0  171.01    2.39
   4   2   1    6.07    0.48
   4   2   2   66.54    1.56
  -4  -2  -3   48.67    1.39
   4   2   3   51.56    1.44
   4   2   4   13.40    0.80
   4   2   4   12.88    0.77
  -4  -2  -4   14.96    0.92
   4   2   4   13.89    0.89
  -4  -2  -4   12.98    0.74
   4   2   4   13.47    0.86
   4   2   5    7.91    0.62
   4   2   5    8.53    0.76
  -4  -2  -5    6.61    0.68
   4   2   6    1.56    0.44
  -4  -2  -6    1.38    0.41
   4   2   7   60.19    1.77
  -4  -2  -7   58.15    1.82
   4   2   8    0.64    0.26
  -4  -2  -8    1.10    0.28
  -4  -2  -9    0.21    0.14
  -4  -3  13    2.30    0.27
  -4  -3  12   19.85    0.87
  -4  -3  12   18.30    0.80
  -4  -3  11   43.22    1.43
  -4  -3  11   42.03    1.41
  -4  -3  10   13.58    0.89
   4   3 -10   11.44    0.70
  -4  -3  10   14.04    0.92
   4   3  -9    0.53    0.25
  -4  -3   9    0.83    0.30
   4   3  -8   70.59    1.54
  -4  -3   8   75.14    1.99
  -4  -3   8   73.88    2.05
  -4  -3   7   68.95    1.92
  -4  -3   6    0.62    0.26
  -4  -3   5    2.87    0.41
  -4  -3   4   89.11    1.90
   4   3  -3  153.07    2.37
   4   3  -2  244.76    2.99
   4   3  -1   16.67    0.80
   4   3   0   70.91    1.67
   4   3   1   51.69    1.47
   4   3   2   14.99    0.81
   4   3   3  112.77    2.25
   4   3   3  115.25    2.41
  -4  -3  -3  115.14    2.43
   4   3   3  114.70    2.28
   4   3   4    2.04    0.39
   4   3   4    2.28    0.44
  -4  -3  -4    2.13    0.40
   4   3   4    2.72    0.40
   4   3   5   34.00    1.42
  -4  -3  -5   31.95    1.41
   4   3   5   32.26    1.25
   4   3   6    5.46    0.53
   4   3   6    5.70    0.61
  -4  -3  -6    6.14    0.68
  -4  -3  -7   42.85    1.50
  -4  -3  -8    5.88    0.51
  -4  -3  -9    0.13    0.11
  -4  -4  13    2.63    0.25
  -4  -4  12    4.39    0.40
  -4  -4  11    9.53    0.68
  -4  -4  11    9.49    0.62
  -4  -4  10    1.37    0.38
   4   4 -10    0.69    0.25
  -4  -4  10    1.19    0.33
   4   4  -9    1.00    0.28
  -4  -4   9    1.32    0.31
   4   4  -8    9.57    0.74
   4   4  -8    9.36    0.62
  -4  -4   8    9.00    0.74
   4   4  -7   53.76    1.62
  -4  -4   7   48.54    1.58
   4   4  -7   50.89    1.35
  -4  -4   6    7.32    0.62
   4   4  -5    3.39    0.45
  -4  -4   5    4.04    0.47
   4   4  -4   50.27    1.50
   4   4  -3  141.00    2.45
   4   4  -2   14.88    0.81
   4   4  -1    1.21    0.30
   4   4   0   32.23    1.20
   4   4   1   38.15    1.33
   4   4   2   10.20    0.72
  -4  -4  -2    9.93    0.71
   4   4   2   10.29    0.72
   4   4   3   80.38    2.04
  -4  -4  -3   81.82    2.11
   4   4   3   84.52    2.04
   4   4   4    7.24    0.69
  -4  -4  -4    7.41    0.69
   4   4   5    1.90    0.38
  -4  -4  -5    1.86    0.45
   4   4   6   22.66    0.99
  -4  -4  -6   24.32    1.17
  -4  -4  -7    0.47    0.26
  -4  -4  -8   19.60    0.74
  -4  -5  12   22.94    0.77
  -4  -5  11    6.99    0.56
  -4  -5  10    2.51    0.46
   4   5 -10    2.33    0.33
  -4  -5  10    2.84    0.38
   4   5  -9   11.30    0.68
  -4  -5   9   12.39    0.78
   4   5  -8    8.14    0.70
   4   5  -8    7.28    0.60
  -4  -5   8    7.10    0.63
   4   5  -7    2.37    0.37
   4   5  -7    1.98    0.38
   4   5  -6   51.36    1.62
   4   5  -6   50.16    1.38
   4   5  -5    0.06    0.17
   4   5  -5    0.07    0.12
   4   5  -5   -0.16    0.24
   4   5  -4  121.11    2.46
   4   5  -3    0.20    0.18
   4   5  -2   20.42    1.03
   4   5  -1   25.41    1.13
   4   5   0    0.66    0.24
   4   5   0    0.63    0.25
   4   5   1   92.98    2.18
   4   5   1   92.41    2.21
   4   5   2    1.89    0.40
  -4  -5  -2    2.11    0.33
  -4  -5  -3    3.99    0.51
   4   5   3    3.75    0.52
  -4  -5  -4    5.95    0.62
   4   5   4    5.68    0.62
  -4  -5  -5    6.93    0.64
   4   5   5    7.38    0.66
  -4  -5  -6   10.51    0.69
   4   5   7    7.90    0.49
  -4  -5  -7    8.80    0.54
  -4  -6  12    1.50    0.18
  -4  -6  11   21.43    0.79
  -4  -6  10    0.26    0.20
   4   6 -10    0.09    0.18
   4   6  -9   24.54    0.94
   4   6  -8    3.50    0.43
   4   6  -7    0.77    0.29
  -4  -6   7    1.34    0.32
   4   6  -7    0.84    0.35
   4   6  -6    0.62    0.29
   4   6  -6    0.66    0.28
   4   6  -5    7.19    0.66
   4   6  -5    7.39    0.59
   4   6  -4   31.52    1.31
   4   6  -4   29.47    1.27
   4   6  -4   31.76    1.17
   4   6  -3   30.98    1.28
   4   6  -3   30.84    1.32
   4   6  -3   32.29    1.23
   4   6  -2    3.48    0.50
   4   6  -2    3.92    0.51
   4   6  -2    4.84    0.51
   4   6  -1    0.29    0.16
   4   6  -1    0.24    0.26
   4   6   0    0.89    0.29
   4   6   1   39.82    1.50
   4   6   1   41.56    1.53
   4   6   2    3.71    0.53
   4   6   2    3.28    0.55
   4   6   3    0.21    0.23
   4   6   3    0.23    0.27
   4   6   4    0.80    0.32
  -4  -6  -4    1.19    0.24
   4   6   4    1.01    0.32
  -4  -6  -5    1.19    0.23
   4   6   5    0.38    0.21
  -4  -6  -6    7.02    0.44
   4   6   6    7.73    0.51
   4   6   7    3.28    0.26
  -4  -7  11    1.20    0.17
  -4  -7  10    7.62    0.47
   4   7 -10    7.82    0.46
  -4  -7   9   30.92    1.08
   4   7  -9   32.26    1.00
   4   7  -8   27.64    1.01
   4   7  -7    0.67    0.34
   4   7  -7    0.85    0.30
   4   7  -6   14.14    0.90
   4   7  -6   15.24    0.85
   4   7  -5    0.35    0.23
   4   7  -5    0.76    0.23
   4   7  -4   34.42    1.37
   4   7  -4   35.46    1.31
   4   7  -3   10.96    0.81
   4   7  -3   10.33    0.77
   4   7  -2   10.10    0.79
   4   7  -2   10.44    0.77
   4   7  -1    0.16    0.20
   4   7  -1    0.19    0.25
   4   7   0    9.35    0.73
   4   7   0    9.13    0.76
   4   7   1   13.57    0.90
   4   7   2   10.62    0.82
   4   7   3    9.56    0.73
   4   7   4    1.93    0.36
   4   7   5    1.55    0.30
   4   7   6    1.34    0.19
   4   8 -10   36.35    0.73
   4   8  -9    4.58    0.34
  -4  -8   9    3.73    0.29
  -4  -8   8    7.75    0.48
   4   8  -8    9.90    0.54
   4   8  -7   50.89    1.31
   4   8  -6    0.63    0.27
   4   8  -6    0.67    0.26
   4   8  -5    8.63    0.69
   4   8  -5    8.66    0.63
   4   8  -4    0.19    0.23
   4   8  -4    0.10    0.30
   4   8  -3   19.42    1.00
   4   8  -3   19.61    1.02
   4   8  -2   28.42    1.19
   4   8  -2   29.80    1.22
   4   8  -1    2.82    0.47
   4   8  -1    3.27    0.49
   4   8   0   44.42    1.44
   4   8   0   47.01    1.53
   4   8   1    2.50    0.38
   4   8   1    2.66    0.44
   4   8   2    8.86    0.59
   4   8   2   10.12    0.68
   4   8   3   26.30    0.87
   4   8   3   30.57    1.06
   4   8   4    0.30    0.14
   4   8   4    1.07    0.21
   4   8   5    9.92    0.39
   4   9  -8    0.11    0.12
   4   9  -7   19.16    0.67
   4   9  -6   10.00    0.55
   4   9  -5   13.67    0.69
   4   9  -5   16.17    0.74
   4   9  -4   30.90    1.06
   4   9  -4   33.43    1.09
   4   9  -3    1.72    0.32
   4   9  -3    1.92    0.33
   4   9  -2   18.94    0.82
   4   9  -2   21.25    0.91
   4   9  -1    2.84    0.33
   4   9  -1    3.17    0.42
   4   9   0    7.73    0.48
   4   9   0    9.78    0.62
   4   9   1    2.55    0.34
   4   9   1    1.78    0.22
   4   9   2   -0.09    0.11
   4   9   3    6.54    0.37
   4  10  -6    6.84    0.33
   4  10  -5    4.37    0.31
   4  10  -4   10.25    0.48
   4  10  -3    1.32    0.24
   4  10  -2    2.38    0.28
   4  10  -1    2.84    0.29
   4  10   0    5.86    0.36
   4  10   1   17.65    0.51
  -5  11   4    0.14    0.09
  -5  11   3    2.12    0.23
  -5  11   2    0.78    0.18
  -5  11   2    0.64    0.15
  -5  11   1    3.26    0.29
  -5  11   1    2.11    0.21
  -5  11   0    2.10    0.23
  -5  11  -1    0.40    0.13
  -5  11  -2    0.37    0.11
  -5  10   7    9.46    0.41
  -5  10   6    4.18    0.32
  -5  10   5   11.98    0.61
  -5  10   5   10.95    0.59
  -5  10   5   10.12    0.52
  -5  10   4    0.34    0.22
  -5  10   4    0.35    0.22
  -5  10   4    0.22    0.17
  -5  10   4    0.30    0.16
  -5  10   4    0.35    0.14
  -5  10   3    5.16    0.44
  -5  10   3    5.34    0.39
  -5  10   3    4.86    0.47
  -5  10   3    3.99    0.37
  -5  10   3    4.84    0.39
  -5  10   2    0.95    0.26
  -5  10   2    0.61    0.24
  -5  10   2    1.03    0.20
  -5  10   2    0.72    0.21
  -5  10   2    0.79    0.22
  -5  10   1    5.65    0.46
  -5  10   1    5.37    0.42
  -5  10   1    4.94    0.46
  -5  10   1    5.10    0.40
  -5  10   0    8.35    0.54
  -5  10   0    7.89    0.49
  -5  10  -1    8.15    0.53
  -5  10  -1    7.70    0.48
  -5  10  -2    4.71    0.40
  -5  10  -3    6.21    0.37
  -5  10  -4    8.37    0.33
  -5   9   9    0.00    0.07
  -5   9   8    1.64    0.24
  -5   9   7    6.44    0.51
  -5   9   7    5.63    0.45
  -5   9   6    0.11    0.22
  -5   9   6   -0.02    0.16
  -5   9   6   -0.03    0.13
  -5   9   5   11.00    0.67
  -5   9   5   12.50    0.75
  -5   9   5   11.50    0.76
  -5   9   5   11.73    0.70
  -5   9   4   16.64    0.82
  -5   9   4   16.47    0.68
  -5   9   4   17.27    0.94
  -5   9   4   15.09    0.87
  -5   9   4   15.05    0.78
  -5   9   3    2.29    0.39
  -5   9   3    1.91    0.31
  -5   9   3    2.09    0.44
  -5   9   3    2.09    0.34
  -5   9   3    2.28    0.42
  -5   9   3    1.87    0.28
  -5   9   2   79.96    1.80
  -5   9   2   77.22    1.61
  -5   9   2   80.97    2.09
  -5   9   2   72.66    1.68
  -5   9   2   72.42    1.46
  -5   9   2   75.75    1.86
  -5   9   2   78.05    1.63
  -5   9   1    5.52    0.55
  -5   9   1    5.92    0.50
  -5   9   1    6.02    0.62
  -5   9   1    6.11    0.46
  -5   9   1    5.71    0.47
  -5   9   1    5.25    0.52
  -5   9   0   13.28    0.79
  -5   9   0   12.64    0.70
  -5   9   0   13.44    0.88
  -5   9   0   14.09    0.73
  -5   9   0   14.78    0.89
  -5   9  -1    7.36    0.61
  -5   9  -1    6.82    0.59
  -5   9  -1    8.29    0.58
  -5   9  -1    8.59    0.68
  -5   9  -2    0.05    0.23
  -5   9  -2    0.26    0.26
  -5   9  -2    0.66    0.25
  -5   9  -3   24.36    0.89
  -5   9  -3   27.75    1.04
  -5   9  -4    1.47    0.24
  -5   9  -4    1.74    0.30
  -5   9  -5    5.77    0.30
  -5   9  -5    7.77    0.42
  -5   8  10    7.32    0.38
  -5   8   9    0.59    0.20
  -5   8   8    0.61    0.25
  -5   8   8    0.71    0.24
  -5   8   7   15.97    0.80
  -5   8   7   15.81    0.90
  -5   8   7   13.80    0.83
  -5   8   6    6.03    0.56
  -5   8   6    6.08    0.64
  -5   8   6    5.21    0.58
  -5   8   5    1.64    0.39
  -5   8   5    1.81    0.40
  -5   8   5    1.74    0.45
  -5   8   5    1.16    0.35
  -5   8   4   26.83    1.10
  -5   8   4   27.14    0.93
  -5   8   4   26.86    1.26
  -5   8   4   24.99    1.11
  -5   8   4   26.05    1.25
  -5   8   4   27.25    1.27
  -5   8   3    8.93    0.67
  -5   8   3    8.61    0.58
  -5   8   3    9.55    0.83
  -5   8   3    8.35    0.71
  -5   8   3    9.12    0.66
  -5   8   3    8.08    0.53
  -5   8   3    8.81    0.76
  -5   8   2   36.35    1.30
  -5   8   2   36.92    1.15
  -5   8   2   35.07    1.34
  -5   8   2   35.80    1.18
  -5   8   2   34.23    1.38
  -5   8   2   34.35    1.08
  -5   8   2   37.01    1.56
  -5   8   1   26.33    1.12
  -5   8   1   25.44    0.99
  -5   8   1   24.69    0.96
  -5   8   1   25.47    1.17
  -5   8   1   27.26    1.35
  -5   8   1   27.43    1.23
  -5   8   0    0.01    0.26
  -5   8   0    0.23    0.25
  -5   8   0    0.43    0.27
  -5   8   0    0.42    0.25
  -5   8   0    0.05    0.27
  -5   8   0    0.55    0.26
  -5   8  -1    3.66    0.57
  -5   8  -1    3.57    0.46
  -5   8  -1    3.49    0.51
  -5   8  -2    0.94    0.39
  -5   8  -2    1.30    0.31
  -5   8  -2    1.42    0.39
  -5   8  -2    1.41    0.34
  -5   8  -3   23.84    1.11
  -5   8  -3   25.46    1.06
  -5   8  -4   15.18    0.85
  -5   8  -4   15.78    0.77
  -5   8  -5    2.77    0.37
  -5   8  -6    0.76    0.18
  -5   7  11    0.24    0.14
  -5   7  10    7.66    0.46
  -5   7   9    3.75    0.41
  -5   7   9    4.00    0.48
  -5   7   9    3.65    0.40
  -5   7   8    2.02    0.39
  -5   7   8    2.04    0.41
  -5   7   7   30.90    1.16
  -5   7   7   31.49    1.34
  -5   7   6   18.53    0.93
  -5   7   6   19.20    1.02
  -5   7   6   18.92    1.12
  -5   7   6   17.59    1.00
  -5   7   5   14.62    0.83
  -5   7   5   15.80    0.96
  -5   7   5   13.39    0.96
  -5   7   5   15.07    0.96
  -5   7   4   10.68    0.72
  -5   7   4    9.71    0.84
  -5   7   4    9.74    0.72
  -5   7   4   10.29    0.81
  -5   7   4   10.39    0.81
  -5   7   3    3.00    0.45
  -5   7   3    2.94    0.38
  -5   7   3    3.28    0.53
  -5   7   3    3.03    0.51
  -5   7   3    2.89    0.36
  -5   7   3    2.93    0.44
  -5   7   3    2.96    0.49
  -5   7   2   93.75    2.02
  -5   7   2   87.59    1.70
  -5   7   2   96.48    2.48
  -5   7   2   84.72    1.66
  -5   7   2   89.74    2.27
  -5   7   2   89.17    2.13
  -5   7   2   87.85    2.22
  -5   7   1   46.28    1.45
  -5   7   1   47.16    1.31
  -5   7   1   50.24    1.84
  -5   7   1   47.28    1.31
  -5   7   1   48.05    1.65
  -5   7   1   49.02    1.60
  -5   7   0    2.48    0.39
  -5   7   0    2.96    0.53
  -5   7   0    2.58    0.41
  -5   7   0    3.63    0.50
  -5   7   0    2.52    0.46
  -5   7  -1   40.02    1.26
  -5   7  -1   38.66    1.48
  -5   7  -1   41.70    1.47
  -5   7  -2    3.38    0.46
  -5   7  -2    3.22    0.49
  -5   7  -2    3.25    0.47
  -5   7  -3   54.77    1.76
  -5   7  -3   58.51    1.66
  -5   7  -4    5.35    0.58
  -5   7  -4    5.10    0.52
  -5   7  -5   -0.01    0.24
  -5   7  -5    0.10    0.21
  -5   7  -5   -0.02    0.09
  -5   7  -6   -0.05    0.20
  -5   7  -7    8.39    0.42
  -5   6  11    6.83    0.47
  -5   6  10    0.84    0.20
  -5   6  10    0.67    0.30
  -5   6  10    1.10    0.27
  -5   6   9    6.17    0.53
  -5   6   9    6.75    0.67
  -5   6   9    6.43    0.62
  -5   6   8   17.07    0.82
  -5   6   8   16.27    0.96
  -5   6   8   16.62    1.06
  -5   6   8   16.36    0.99
  -5   6   7   16.63    0.87
  -5   6   7   16.47    1.01
  -5   6   7   16.00    1.04
  -5   6   6   33.05    1.21
  -5   6   6   35.50    1.34
  -5   6   6   33.83    1.47
  -5   6   6   35.79    1.40
  -5   6   5    2.88    0.44
  -5   6   5    2.87    0.46
  -5   6   5    3.24    0.57
  -5   6   5    3.10    0.47
  -5   6   5    3.16    0.37
  -5   6   4    0.57    0.28
  -5   6   4    0.01    0.20
  -5   6   4    0.35    0.27
  -5   6   4    0.43    0.19
  -5   6   4    0.25    0.27
  -5   6   3   39.17    1.24
  -5   6   3   41.72    1.54
  -5   6   3   37.54    1.50
  -5   6   3   38.80    1.45
  -5   6   3   34.38    1.26
  -5   6   3   37.64    1.19
  -5   6   2   56.70    1.50
  -5   6   2   56.52    1.28
  -5   6   2   62.53    1.91
  -5   6   2   55.39    1.74
  -5   6   2   57.90    1.31
  -5   6   2   60.69    1.79
  -5   6   2   59.56    1.62
  -5   6   1   46.49    1.32
  -5   6   1   45.16    1.20
  -5   6   1   46.58    1.24
  -5   6   1   46.20    1.57
  -5   6   1   45.03    1.46
  -5   6   0    4.11    0.42
  -5   6   0    3.99    0.45
  -5   6   0    4.45    0.48
  -5   6   0    3.99    0.51
  -5   6   0    4.41    0.55
  -5   6   0    4.27    0.48
  -5   6  -1   20.85    0.92
  -5   6  -1   20.36    1.07
  -5   6  -1   21.95    1.08
  -5   6  -1   23.54    1.05
  -5   6  -2    5.22    0.52
  -5   6  -2    3.72    0.52
  -5   6  -2    5.24    0.62
  -5   6  -2    5.72    0.60
  -5   6  -3    5.96    0.63
  -5   6  -3    6.94    0.62
  -5   6  -4   24.16    1.19
  -5   6  -4   24.19    1.03
  -5   6  -5    3.37    0.50
  -5   6  -6    3.77    0.44
  -5   6  -7   22.19    0.83
  -5   6  -7   21.16    0.70
  -5   5  12    1.41    0.25
  -5   5  11    0.36    0.19
  -5   5  11    0.58    0.23
  -5   5  10   18.12    1.02
  -5   5  10   18.12    1.03
  -5   5   9    8.97    0.66
  -5   5   9   10.15    0.85
  -5   5   9    9.48    0.74
  -5   5   9    9.15    0.82
  -5   5   8   77.18    1.66
  -5   5   8   80.28    2.08
  -5   5   7    8.40    0.62
  -5   5   7    8.58    0.74
  -5   5   7    8.11    0.69
  -5   5   7    7.04    0.58
  -5   5   6   41.96    1.31
  -5   5   6   44.75    1.40
  -5   5   6   45.04    1.63
  -5   5   6   45.15    1.51
  -5   5   6   40.81    1.32
  -5   5   5   23.87    0.96
  -5   5   5   25.50    1.22
  -5   5   5   23.71    1.12
  -5   5   5   23.49    0.96
  -5   5   4    3.15    0.35
  -5   5   3   89.57    1.68
  -5   5   2   10.88    0.58
  -5   5   1    5.21    0.43
  -5   5   0    2.02    0.29
  -5   5   0    1.50    0.29
  -5   5  -1    1.10    0.33
  -5   5  -1    1.53    0.33
  -5   5  -1    0.57    0.32
  -5   5  -1    1.15    0.27
  -5   5  -2   10.60    0.67
  -5   5  -2   10.15    0.77
  -5   5  -2   10.79    0.78
  -5   5  -2   10.94    0.69
  -5   5  -3   20.34    1.07
  -5   5  -4   22.58    1.16
  -5   5  -4   23.65    1.20
  -5   5  -5    6.00    0.61
  -5   5  -6    4.31    0.54
  -5   5  -7   22.08    0.90
  -5   5  -8    1.44    0.21
  -5   5  -8    1.71    0.23
  -5   4  13   10.07    0.44
  -5   4  12    1.42    0.25
  -5   4  12    1.44    0.30
  -5   4  11    5.40    0.53
  -5   4  11    5.37    0.57
  -5   4  10   24.19    1.22
  -5   4  10   21.68    1.17
  -5   4   9    3.78    0.53
  -5   4   8   23.56    1.10
  -5   4   8   22.76    1.18
  -5   4   7   29.45    1.24
  -5   4   7   28.15    1.15
  -5   4   7   24.48    0.99
  -5   4   7   26.39    1.19
  -5   4   6   12.22    0.68
  -5   4   5   29.11    0.99
  -5   4   4    1.67    0.33
  -5   4   4    2.12    0.27
  -5   4   3   82.25    1.85
  -5   4   3   92.17    1.51
  -5   4   2   11.21    0.71
  -5   4   2   12.25    0.56
  -5   4   1    6.17    0.42
  -5   4   1    6.16    0.50
  -5   4   0   21.77    0.75
  -5   4   0   21.44    0.95
  -5   4  -1   12.44    0.77
  -5   4  -2   82.89    1.88
  -5   4  -2   90.94    2.19
  -5   4  -3   25.23    1.12
  -5   4  -3   26.69    1.18
  -5   4  -4    5.45    0.62
  -5   4  -4    5.87    0.66
  -5   4  -5    9.63    0.77
  -5   4  -6    1.34    0.36
  -5   4  -7   31.12    1.11
  -5   4  -8   16.40    0.63
  -5   3  13   11.07    0.54
  -5   3  12    2.22    0.32
  -5   3  12    2.05    0.36
  -5   3  11    5.08    0.57
  -5   3  10    0.36    0.30
  -5   3  10    0.69    0.35
  -5   3   9    3.11    0.52
  -5   3   9    2.65    0.57
  -5   3   8    7.09    0.65
  -5   3   8    5.80    0.61
  -5   3   8    6.96    0.74
  -5   3   7   10.01    0.73
  -5   3   6   12.62    0.67
  -5   3   6   12.02    0.74
  -5   3   6   10.90    0.59
  -5   3   5    6.34    0.52
  -5   3   5    6.54    0.51
  -5   3   5    6.63    0.42
  -5   3   4   96.22    1.84
  -5   3   4   93.23    1.82
  -5   3   4   99.59    1.47
  -5   3   3   19.38    0.86
  -5   3   3   21.18    0.63
  -5   3   2   56.23    1.43
  -5   3   1   69.71    1.61
  -5   3   0   27.95    1.02
  -5   3  -1   49.49    1.51
  -5   3  -1   50.96    1.37
  -5   3  -2   19.30    1.02
  -5   3  -3   30.72    1.18
  -5   3  -3   31.42    1.37
  -5   3  -3   28.64    1.14
  -5   3  -4   14.40    0.84
   5  -3   5    1.65    0.38
  -5   3  -5    1.77    0.39
   5  -3   6    9.07    0.66
  -5   3  -6    8.34    0.67
  -5   3  -7    0.50    0.19
   5  -3   7    0.43    0.19
   5  -3   8   32.11    0.86
  -5   3  -8   29.49    0.85
  -5   2  13    2.77    0.31
  -5   2  12   21.69    0.86
  -5   2  12   22.49    1.04
  -5   2  11   13.75    0.85
  -5   2  11   14.86    0.90
  -5   2  11   14.89    0.98
  -5   2  10   13.69    0.91
  -5   2  10   13.78    1.02
  -5   2   9   41.04    1.51
  -5   2   9   42.54    1.70
  -5   2   8    2.21    0.47
  -5   2   8    1.70    0.38
  -5   2   8    2.25    0.36
  -5   2   7    3.01    0.44
  -5   2   6   50.24    1.24
  -5   2   6   47.34    1.48
  -5   2   5   13.16    0.67
  -5   2   5   11.64    0.71
  -5   2   4   69.48    1.61
  -5   2   4   73.97    1.54
  -5   2   3   90.89    1.71
  -5   2   3   85.96    1.74
  -5   2   2   73.07    1.54
  -5   2   1   55.46    1.36
  -5   2   0   26.53    0.94
  -5   2  -1   69.50    1.77
  -5   2  -1   65.98    1.46
  -5   2  -2   13.26    0.85
  -5   2  -3   57.54    1.82
   5  -2   4   25.88    1.14
   5  -2   4   28.24    1.17
  -5   2  -4   25.89    1.12
   5  -2   5    1.86    0.38
  -5   2  -5    1.49    0.34
  -5   2  -5    1.74    0.29
   5  -2   6   20.15    1.01
  -5   2  -6   18.35    0.94
   5  -2   7    0.60    0.24
  -5   2  -7    0.47    0.20
   5  -2   8   14.01    0.64
  -5   2  -8   11.88    0.51
  -5   2  -9    3.46    0.26
  -5   1  13    0.46    0.18
  -5   1  12   19.55    0.95
  -5   1  11   50.90    1.67
  -5   1  11   47.20    1.75
  -5   1  10    4.19    0.56
  -5   1  10    4.29    0.63
  -5   1   9  137.89    2.92
  -5   1   9  138.62    2.75
  -5   1   9  134.73    2.97
  -5   1   8   22.18    1.18
  -5   1   8   22.01    1.09
  -5   1   8   22.01    1.14
  -5   1   7   26.63    1.22
  -5   1   6   64.47    1.38
  -5   1   6   60.33    1.71
  -5   1   5    0.60    0.22
  -5   1   4   26.29    1.05
  -5   1   3   93.99    1.88
   5  -1  -2   16.96    0.61
   5  -1  -1   44.35    0.98
  -5   1   0   21.55    0.82
  -5   1  -1   47.85    1.19
  -5   1  -2    1.51    0.37
  -5   1  -3    0.37    0.23
   5  -1   4    4.27    0.52
  -5   1  -4    5.75    0.60
  -5   1  -4    4.71    0.60
   5  -1   5    0.76    0.29
  -5   1  -5    1.19    0.29
   5  -1   6    1.67    0.39
  -5   1  -6    1.57    0.38
   5  -1   7    4.74    0.50
  -5   1  -7    5.25    0.48
   5  -1   8   11.44    0.62
  -5   1  -8   10.71    0.52
  -5   0  13    6.32    0.42
  -5   0  12    0.06    0.10
  -5   0  12    0.42    0.25
  -5   0  11    3.14    0.40
  -5   0  11    3.86    0.56
  -5   0  11    3.33    0.56
  -5   0  10    7.04    0.61
  -5   0  10    6.43    0.70
  -5   0  10    6.34    0.73
  -5   0   9   38.42    1.57
  -5   0   9   39.36    1.53
  -5   0   9   37.66    1.56
  -5   0   8   25.55    1.26
  -5   0   8   26.88    1.21
  -5   0   8   27.08    1.26
  -5   0   7    1.03    0.32
  -5   0   6   63.65    1.78
  -5   0   5   -0.15    0.22
  -5   0   4  152.59    2.55
  -5   0   3  117.04    2.18
   5   0  -2   41.61    1.06
   5   0  -1   14.62    0.64
   5   0   0   15.31    0.65
  -5   0  -1    3.33    0.33
   5   0   1    3.35    0.32
  -5   0  -2   17.50    0.93
   5   0   3    2.93    0.43
  -5   0  -3    2.94    0.45
  -5   0  -3    2.09    0.42
   5   0   4   12.45    0.86
  -5   0  -4   12.52    0.88
  -5   0  -4   12.92    0.88
   5   0   5    5.03    0.60
  -5   0  -5    5.56    0.63
   5   0   6    0.00    0.19
  -5   0  -6    0.24    0.25
   5   0   7   17.87    0.93
  -5   0  -7   19.80    0.94
  -5   0  -8    0.74    0.22
  -5   0  -8    0.97    0.22
   5   0   8    0.76    0.22
  -5  -1  13   21.48    0.65
  -5  -1  12    3.18    0.37
  -5  -1  12    2.66    0.40
  -5  -1  11   16.17    0.86
  -5  -1  11   16.55    0.99
  -5  -1  11   16.16    1.01
  -5  -1  10   37.54    1.34
  -5  -1  10   38.61    1.52
  -5  -1  10   38.70    1.59
  -5  -1   9   72.25    2.06
  -5  -1   9   71.47    2.10
  -5  -1   8   99.79    2.29
  -5  -1   8   99.63    2.48
  -5  -1   8   97.78    2.33
  -5  -1   7   29.18    1.29
  -5  -1   6   81.33    2.06
  -5  -1   5   72.28    1.86
  -5  -1   4   24.10    1.06
   5   1  -3  271.69    3.03
   5   1  -2    7.96    0.53
   5   1  -1   12.13    0.65
   5   1   0   69.73    1.53
   5   1   1    2.05    0.31
  -5  -1  -2  122.63    2.39
   5   1   2  119.26    2.08
   5   1   3   23.84    1.15
  -5  -1  -3   26.62    1.22
  -5  -1  -3   24.49    1.13
   5   1   3   23.79    0.97
   5   1   4   19.13    1.09
  -5  -1  -4   19.21    1.10
  -5  -1  -4   18.18    0.98
   5   1   5   23.60    1.21
  -5  -1  -5   24.16    1.24
   5   1   6    0.90    0.33
  -5  -1  -6    1.36    0.34
   5   1   7    8.70    0.66
  -5  -1  -7    9.91    0.68
  -5  -1  -8    0.40    0.17
  -5  -2  13   17.13    0.60
  -5  -2  12   14.45    0.73
  -5  -2  12   13.44    0.76
  -5  -2  11    2.15    0.39
  -5  -2  11    1.65    0.35
  -5  -2  11    1.39    0.37
  -5  -2  10   21.81    1.17
  -5  -2  10   21.60    1.15
  -5  -2   9    6.13    0.65
  -5  -2   9    6.91    0.69
   5   2  -8   21.73    0.96
  -5  -2   8   20.09    1.07
  -5  -2   8   20.41    1.15
  -5  -2   8   19.48    1.03
  -5  -2   7   55.08    1.80
  -5  -2   6    0.44    0.24
  -5  -2   5   11.90    0.80
   5   2  -4    0.61    0.25
  -5  -2   4    0.57    0.21
   5   2  -3   19.83    0.89
   5   2  -2    4.56    0.44
   5   2  -1   19.26    0.88
   5   2   0  102.08    2.01
   5   2   1   45.32    1.38
   5   2   2   44.70    1.56
  -5  -2  -2   46.83    1.56
  -5  -2  -2   45.82    1.44
   5   2   2   47.00    1.42
   5   2   3   18.66    1.04
  -5  -2  -3   19.84    1.09
  -5  -2  -3   18.85    0.96
   5   2   3   17.97    0.90
   5   2   4    0.84    0.31
  -5  -2  -4    0.85    0.34
   5   2   5   18.59    1.09
  -5  -2  -5   17.98    1.06
   5   2   6   14.17    0.91
  -5  -2  -6   14.33    0.93
  -5  -2  -7   12.34    0.73
  -5  -2  -8   11.69    0.55
  -5  -3  13    9.15    0.44
  -5  -3  12    1.50    0.29
  -5  -3  12    1.30    0.28
  -5  -3  11    5.58    0.58
  -5  -3  11    5.47    0.54
   5   3 -10    2.24    0.34
  -5  -3  10    1.66    0.39
  -5  -3   9    9.61    0.79
   5   3  -8    0.80    0.30
  -5  -3   8    1.13    0.34
   5   3  -7   21.90    1.03
  -5  -3   7   23.40    1.20
  -5  -3   6   19.79    1.08
   5   3  -5   29.43    1.21
  -5  -3   5   29.91    1.27
   5   3  -4   51.94    1.56
   5   3  -3    4.43    0.50
   5   3  -2   22.90    1.04
   5   3  -1   10.58    0.72
   5   3   0   16.95    0.90
  -5  -3  -1   28.18    1.19
   5   3   1   29.55    1.19
  -5  -3  -2   10.98    0.80
   5   3   2   11.65    0.79
  -5  -3  -3    1.48    0.41
  -5  -3  -4   14.72    0.98
  -5  -3  -5   20.75    1.12
  -5  -3  -6   35.98    1.34
  -5  -3  -7    4.86    0.46
  -5  -3  -8   18.95    0.58
  -5  -4  13    0.47    0.12
  -5  -4  12    3.04    0.35
  -5  -4  12    2.45    0.29
  -5  -4  11   10.56    0.69
  -5  -4  11   10.32    0.66
   5   4 -10   10.37    0.61
  -5  -4  10   10.84    0.76
   5   4  -9   10.71    0.62
  -5  -4   9   12.42    0.87
   5   4  -8    5.90    0.62
   5   4  -8    6.01    0.49
  -5  -4   8    5.56    0.62
   5   4  -7    0.39    0.26
   5   4  -7    0.59    0.17
  -5  -4   6   37.02    1.42
   5   4  -6   35.47    1.42
   5   4  -5    2.25    0.41
   5   4  -5    2.36    0.41
   5   4  -4  161.79    2.93
   5   4  -3    6.11    0.62
   5   4  -2   90.42    2.17
   5   4  -1   15.10    0.89
  -5  -4   0   27.40    1.17
   5   4   0   29.28    1.25
  -5  -4  -1  107.02    2.38
   5   4   1  111.56    2.40
  -5  -4  -2    1.07    0.31
  -5  -4  -3    4.44    0.57
  -5  -4  -4   43.16    1.59
  -5  -4  -5    2.91    0.47
  -5  -4  -6    9.07    0.63
  -5  -4  -7    1.27    0.22
   5   4   7    1.04    0.13
  -5  -5  12    4.23    0.33
  -5  -5  11   50.89    1.34
  -5  -5  11   47.69    1.15
   5   5 -10    1.51    0.23
  -5  -5  10    0.91    0.27
   5   5  -9   28.98    0.98
  -5  -5   9   29.33    1.20
   5   5  -8    0.77    0.32
   5   5  -8    0.29    0.21
  -5  -5   8    0.00    0.23
   5   5  -7   13.80    0.88
   5   5  -7   12.89    0.71
   5   5  -6   10.69    0.80
   5   5  -6   10.94    0.68
   5   5  -5   -0.11    0.19
   5   5  -5   -0.20    0.21
   5   5  -5    0.16    0.22
   5   5  -4   13.87    0.88
   5   5  -4   14.20    0.91
   5   5  -4   13.61    0.75
   5   5  -3   17.73    0.98
   5   5  -3   17.80    1.04
   5   5  -3   17.71    0.88
   5   5  -2    3.19    0.50
   5   5  -2    3.47    0.48
   5   5  -2    3.53    0.42
   5   5  -1    8.77    0.65
   5   5  -1    8.76    0.75
  -5  -5   0    1.96    0.36
   5   5   0    1.47    0.34
  -5  -5  -1   32.39    1.30
   5   5   1   32.63    1.31
  -5  -5  -2    0.92    0.31
   5   5   2    0.81    0.28
  -5  -5  -3    0.23    0.25
   5   5   3   -0.32    0.22
  -5  -5  -4    0.59    0.23
   5   5   4    0.61    0.25
  -5  -5  -5    0.22    0.17
   5   5   5   -0.04    0.16
  -5  -5  -6    0.18    0.14
   5   5   6    0.20    0.09
  -5  -6  11   16.90    0.66
  -5  -6  10   25.56    0.98
   5   6 -10   22.51    0.75
   5   6  -9   13.51    0.64
  -5  -6   9   13.69    0.72
   5   6  -8   30.75    1.27
   5   6  -8   28.88    1.00
  -5  -6   8   29.86    1.17
   5   6  -7    5.06    0.57
   5   6  -7    5.02    0.48
   5   6  -6   67.06    1.94
   5   6  -6   66.30    1.62
   5   6  -5    2.37    0.43
   5   6  -5    1.87    0.33
   5   6  -4   20.36    1.09
   5   6  -4   20.49    0.95
   5   6  -3    5.05    0.64
   5   6  -3    5.45    0.54
   5   6  -2    3.90    0.51
   5   6  -2    3.39    0.51
   5   6  -1    0.69    0.32
   5   6  -1    1.06    0.35
   5   6   0    5.13    0.58
   5   6   1   19.36    1.02
   5   6   2    3.54    0.45
  -5  -6  -3    0.17    0.16
   5   6   3   -0.02    0.15
   5   6   4   13.48    0.70
  -5  -6  -4   13.53    0.68
  -5  -6  -5    4.02    0.30
   5   6   5    3.43    0.31
  -5  -7  10   30.99    0.86
   5   7 -10   27.10    0.69
  -5  -7   9    2.43    0.33
   5   7  -9    2.25    0.26
   5   7  -8   40.04    1.08
   5   7  -7   46.42    1.51
   5   7  -7   46.35    1.26
   5   7  -6   18.73    1.02
   5   7  -6   18.75    0.86
   5   7  -5   28.88    1.26
   5   7  -5   29.32    1.10
   5   7  -4    1.54    0.42
   5   7  -4    0.80    0.34
   5   7  -3   13.31    0.89
   5   7  -3   13.37    0.79
   5   7  -2   12.59    0.89
   5   7  -2   11.45    0.79
   5   7  -1    1.81    0.39
   5   7  -1    2.60    0.40
   5   7   0    9.09    0.73
   5   7   0    8.80    0.70
   5   7   1    0.75    0.31
   5   7   1    0.82    0.25
   5   7   2    3.72    0.43
   5   7   2    4.27    0.43
   5   7   3    5.10    0.44
   5   7   3    5.25    0.44
   5   7   4    3.84    0.33
   5   7   4    4.24    0.35
  -5  -8   9    0.25    0.07
   5   8  -9    0.08    0.10
  -5  -8   8    0.22    0.11
   5   8  -8    0.44    0.15
   5   8  -7   11.54    0.57
   5   8  -6    0.16    0.20
   5   8  -6    0.19    0.16
   5   8  -5    7.38    0.61
   5   8  -5    8.17    0.55
   5   8  -4   12.32    0.78
   5   8  -4   13.42    0.74
   5   8  -3    0.56    0.28
   5   8  -3    0.18    0.26
   5   8  -2   58.78    1.62
   5   8  -2   57.30    1.50
   5   8  -1    2.52    0.39
   5   8  -1    2.40    0.38
   5   8   0   11.73    0.70
   5   8   0   11.97    0.68
   5   8   1   17.56    0.78
   5   8   1   18.46    0.78
   5   8   2    1.46    0.24
   5   8   2    1.60    0.25
   5   8   3    0.41    0.13
   5   8   3    0.36    0.13
   5   9  -7   11.37    0.43
   5   9  -6    8.47    0.43
   5   9  -5    2.18    0.28
   5   9  -5    2.70    0.30
   5   9  -4   13.86    0.64
   5   9  -4   14.26    0.62
   5   9  -3    1.48    0.26
   5   9  -3    1.59    0.25
   5   9  -2   15.14    0.66
   5   9  -2   15.76    0.65
   5   9  -1    1.50    0.24
   5   9  -1    1.44    0.24
   5   9   0    4.43    0.31
   5   9   0    5.20    0.35
   5   9   1   13.51    0.47
   5  10  -3    0.17    0.12
  -6  11   3    2.04    0.19
  -6  11   2    1.48    0.18
  -6  11   1    5.90    0.29
  -6  10   6    3.35    0.29
  -6  10   6    2.33    0.19
  -6  10   5    2.11    0.24
  -6  10   5    1.84    0.20
  -6  10   5    2.30    0.28
  -6  10   4    6.60    0.45
  -6  10   4    4.94    0.35
  -6  10   4    5.52    0.30
  -6  10   4    6.75    0.47
  -6  10   3    6.72    0.45
  -6  10   3    6.30    0.48
  -6  10   2   26.96    0.86
  -6  10   2   25.21    0.90
  -6  10   1    4.55    0.41
  -6  10   1    5.06    0.39
  -6  10   0   29.18    0.83
  -6  10   0   22.58    0.77
  -6  10  -1    7.88    0.41
  -6  10  -1    5.20    0.34
  -6  10  -2    3.43    0.24
  -6   9   8    0.71    0.17
  -6   9   8    0.47    0.12
  -6   9   7    7.87    0.51
  -6   9   7    6.04    0.38
  -6   9   6    0.68    0.23
  -6   9   6    0.49    0.24
  -6   9   6    0.42    0.17
  -6   9   5    1.95    0.35
  -6   9   5    2.08    0.34
  -6   9   5    1.98    0.26
  -6   9   5    1.85    0.33
  -6   9   4    5.08    0.49
  -6   9   4    4.86    0.53
  -6   9   4    4.41    0.47
  -6   9   4    4.40    0.36
  -6   9   3    4.40    0.47
  -6   9   3    4.52    0.50
  -6   9   3    3.79    0.40
  -6   9   3    5.14    0.50
  -6   9   2   22.78    0.92
  -6   9   2   22.43    1.08
  -6   9   2   22.02    0.98
  -6   9   1    6.54    0.52
  -6   9   1    6.61    0.62
  -6   9   1    4.93    0.46
  -6   9   0    0.16    0.21
  -6   9   0    0.34    0.22
  -6   9  -1    5.20    0.43
  -6   9  -1    4.91    0.49
  -6   9  -1    5.79    0.50
  -6   9  -2    0.81    0.21
  -6   9  -2    0.69    0.21
  -6   9  -2    0.72    0.25
  -6   9  -3    6.44    0.35
  -6   9  -3    5.10    0.32
  -6   9  -4    0.44    0.13
  -6   8  10    0.47    0.10
  -6   8   9    2.74    0.29
  -6   8   9    1.91    0.25
  -6   8   8    3.11    0.38
  -6   8   8    1.95    0.30
  -6   8   7   12.27    0.66
  -6   8   7   12.14    0.78
  -6   8   7   10.85    0.65
  -6   8   6    3.89    0.45
  -6   8   6    3.09    0.49
  -6   8   6    3.27    0.40
  -6   8   5    0.01    0.26
  -6   8   5   -0.16    0.24
  -6   8   5    0.03    0.21
  -6   8   5    0.22    0.19
  -6   8   5    0.21    0.31
  -6   8   4    1.01    0.33
  -6   8   4    0.78    0.36
  -6   8   4    0.82    0.35
  -6   8   4    1.37    0.28
  -6   8   4    1.34    0.41
  -6   8   3    2.34    0.40
  -6   8   3    2.04    0.31
  -6   8   3    2.17    0.41
  -6   8   3    1.76    0.37
  -6   8   3    1.86    0.41
  -6   8   2   32.68    1.20
  -6   8   2   33.25    1.47
  -6   8   2   28.77    1.17
  -6   8   2   27.83    0.97
  -6   8   2   32.32    1.33
  -6   8   1    0.29    0.24
  -6   8   1    0.48    0.32
  -6   8   1    0.12    0.26
  -6   8   1    0.09    0.25
  -6   8   1    0.38    0.27
  -6   8   0    4.05    0.48
  -6   8   0    4.31    0.58
  -6   8   0    3.51    0.47
  -6   8   0    4.58    0.54
  -6   8  -1    5.17    0.49
  -6   8  -1    5.34    0.61
  -6   8  -1    4.27    0.47
  -6   8  -1    5.26    0.58
  -6   8  -2    0.52    0.23
  -6   8  -2    0.25    0.22
  -6   8  -2    0.94    0.29
  -6   8  -3   12.02    0.57
  -6   8  -3   11.32    0.69
  -6   8  -4    5.95    0.32
  -6   8  -4    5.74    0.42
  -6   8  -5    0.58    0.15
  -6   7  11    4.29    0.26
  -6   7  10    1.69    0.20
  -6   7  10    1.02    0.20
  -6   7   9   11.36    0.64
  -6   7   9   11.93    0.72
  -6   7   8    2.51    0.32
  -6   7   8    2.30    0.38
  -6   7   8    2.03    0.38
  -6   7   7   10.39    0.67
  -6   7   7   10.18    0.80
  -6   7   7   10.80    0.76
  -6   7   6   23.40    1.03
  -6   7   6   24.25    1.11
  -6   7   6   24.11    1.25
  -6   7   6   22.53    1.03
  -6   7   6   25.67    1.22
  -6   7   5   13.37    0.80
  -6   7   5   13.35    0.89
  -6   7   5   13.72    0.99
  -6   7   5   12.48    0.77
  -6   7   5   13.45    0.90
  -6   7   4   17.58    0.89
  -6   7   4   18.66    1.09
  -6   7   4   15.72    1.06
  -6   7   4   17.35    1.05
  -6   7   3    6.75    0.59
  -6   7   3    7.23    0.73
  -6   7   3    6.22    0.69
  -6   7   3    6.75    0.70
  -6   7   2   44.58    1.40
  -6   7   2   39.89    1.16
  -6   7   2   45.95    1.79
  -6   7   2   39.16    1.51
  -6   7   2   39.93    1.20
  -6   7   2   46.42    1.67
  -6   7   2   46.85    1.54
  -6   7   1   37.52    1.29
  -6   7   1   36.25    1.60
  -6   7   1   32.40    1.14
  -6   7   1   35.31    1.49
  -6   7   1   37.19    1.41
  -6   7   0   24.08    1.02
  -6   7   0   21.52    0.95
  -6   7   0   21.56    1.12
  -6   7   0   23.49    1.31
  -6   7  -1   13.71    0.78
  -6   7  -1   12.36    0.84
  -6   7  -1   13.62    0.89
  -6   7  -2   28.81    1.04
  -6   7  -2   30.96    1.27
  -6   7  -3   14.09    0.66
  -6   7  -3   14.31    0.86
  -6   7  -4   21.81    0.95
  -6   7  -4   17.46    0.88
  -6   7  -5    0.60    0.19
  -6   7  -5    0.12    0.21
  -6   7  -6    4.04    0.28
  -6   6  11    0.53    0.20
  -6   6  11    0.01    0.12
  -6   6  10   35.24    0.97
  -6   6  10   37.51    1.29
  -6   6  10   35.57    1.14
  -6   6   9    0.91    0.20
  -6   6   9    0.09    0.19
  -6   6   9    0.68    0.30
  -6   6   8   23.51    0.91
  -6   6   8   23.63    1.15
  -6   6   8   23.65    1.20
  -6   6   7    7.06    0.58
  -6   6   7    6.02    0.65
  -6   6   7    6.81    0.64
  -6   6   6   75.17    1.82
  -6   6   6   78.15    2.30
  -6   6   6   80.07    2.11
  -6   6   5    3.20    0.47
  -6   6   5    2.69    0.47
  -6   6   5    2.51    0.52
  -6   6   5    2.92    0.46
  -6   6   4   21.23    0.95
  -6   6   4   22.86    1.18
  -6   6   4   20.83    1.21
  -6   6   4   21.84    1.13
  -6   6   3   14.07    0.79
  -6   6   3   14.04    0.96
  -6   6   3   12.54    0.97
  -6   6   3   13.51    0.93
  -6   6   2   10.83    0.70
  -6   6   2   10.94    0.86
  -6   6   2    9.74    0.79
  -6   6   2    9.01    0.61
  -6   6   2   10.71    0.86
  -6   6   2   10.97    0.75
  -6   6   1   29.93    1.11
  -6   6   1   25.40    1.20
  -6   6   1   25.55    1.02
  -6   6   1   28.52    1.33
  -6   6   1   29.45    1.22
  -6   6   0   32.39    1.15
  -6   6   0   33.44    1.45
  -6   6   0   33.01    1.31
  -6   6  -1    3.01    0.51
  -6   6  -1    3.75    0.49
  -6   6  -2   20.76    1.09
  -6   6  -2   24.18    1.14
  -6   6  -3    4.22    0.50
  -6   6  -3    5.29    0.58
  -6   6  -3    4.89    0.49
  -6   6  -4    0.90    0.29
  -6   6  -4    2.30    0.35
  -6   6  -5   13.10    0.70
  -6   6  -5   12.65    0.64
  -6   6  -6    1.75    0.21
  -6   6  -6    1.94    0.26
  -6   6  -6    1.94    0.22
  -6   5  12    3.24    0.31
  -6   5  12    2.82    0.30
  -6   5  11    1.59    0.32
  -6   5  11    1.70    0.32
  -6   5  10   32.15    1.00
  -6   5  10   34.11    1.36
  -6   5  10   33.86    1.31
  -6   5   9    6.85    0.58
  -6   5   9    6.13    0.62
  -6   5   8   50.36    1.68
  -6   5   7    9.90    0.67
  -6   5   7   10.93    0.90
  -6   5   7   12.24    0.82
  -6   5   6    2.80    0.44
  -6   5   6    2.55    0.45
  -6   5   6    2.71    0.47
  -6   5   6    2.87    0.45
  -6   5   5   37.32    1.23
  -6   5   5   37.68    1.37
  -6   5   5   38.19    1.60
  -6   5   5   36.36    1.43
  -6   5   4    6.25    0.52
  -6   5   4    6.31    0.61
  -6   5   4    6.50    0.72
  -6   5   4    5.54    0.58
  -6   5   3   14.64    0.76
  -6   5   3   14.48    0.93
  -6   5   3   14.99    0.99
  -6   5   3   13.95    0.91
  -6   5   3   13.74    0.76
  -6   5   2    0.72    0.28
  -6   5   2    0.38    0.36
  -6   5   2    0.84    0.29
  -6   5   2    0.02    0.19
  -6   5   1   11.97    0.68
  -6   5   1    9.18    0.80
  -6   5   1   11.74    0.85
  -6   5   1   10.96    0.73
  -6   5   0    3.98    0.48
  -6   5   0    4.36    0.57
  -6   5   0    4.03    0.48
  -6   5  -1   13.71    0.85
  -6   5  -1   13.27    0.94
  -6   5  -1   13.29    0.82
  -6   5  -1   13.34    0.85
  -6   5  -2   18.72    1.09
  -6   5  -2   20.48    1.05
  -6   5  -2   19.76    1.04
  -6   5  -3    0.66    0.34
  -6   5  -3    0.82    0.33
  -6   5  -4    2.08    0.42
  -6   5  -4    1.03    0.33
  -6   5  -5   21.27    0.93
  -6   5  -6    2.02    0.28
  -6   5  -6    2.41    0.34
  -6   5  -7   13.38    0.50
  -6   4  13    7.53    0.37
  -6   4  12   16.63    0.72
  -6   4  12   17.13    0.78
  -6   4  11    0.47    0.24
  -6   4  11    0.45    0.24
  -6   4  10   18.13    1.03
  -6   4   9    0.59    0.27
  -6   4   9    0.51    0.27
  -6   4   8   10.85    0.80
  -6   4   8   10.03    0.80
  -6   4   7    0.32    0.29
  -6   4   7    0.62    0.32
  -6   4   7    0.30    0.13
  -6   4   6   83.38    2.21
  -6   4   6   80.80    1.93
  -6   4   6   76.45    1.98
  -6   4   5   30.94    1.07
  -6   4   5   30.74    1.24
  -6   4   5   29.89    1.21
  -6   4   4   46.86    1.53
  -6   4   3   26.91    1.18
  -6   4   2  104.67    2.29
  -6   4   1    0.04    0.24
  -6   4   0    7.06    0.65
  -6   4   0    6.70    0.62
  -6   4  -1   12.21    0.85
  -6   4  -1   11.32    0.73
  -6   4  -2   17.92    1.03
  -6   4  -2   15.51    0.87
  -6   4  -3   20.20    1.02
  -6   4  -4    3.30    0.46
  -6   4  -5    1.87    0.29
  -6   4  -6    0.06    0.11
  -6   4  -7    1.22    0.15
  -6   4  -7    2.15    0.28
  -6   3  13    7.97    0.45
  -6   3  12   24.49    0.92
  -6   3  12   24.60    1.03
  -6   3  11    0.44    0.28
  -6   3  11    0.83    0.34
  -6   3  10   12.30    0.79
  -6   3  10   12.37    0.91
  -6   3   9    0.47    0.32
  -6   3   9    0.85    0.32
  -6   3   8   11.60    0.81
  -6   3   8   13.48    0.94
  -6   3   7    1.42    0.36
  -6   3   7    1.00    0.25
  -6   3   7    1.50    0.31
  -6   3   7    1.15    0.29
  -6   3   6   16.05    0.91
  -6   3   6   15.84    0.84
  -6   3   5    6.96    0.60
  -6   3   5    7.20    0.59
  -6   3   4   12.16    0.76
  -6   3   3    3.05    0.45
  -6   3   2   34.81    1.27
  -6   3   1   55.59    1.59
  -6   3   0    4.94    0.59
  -6   3   0    5.41    0.55
  -6   3  -1   22.06    1.16
  -6   3  -2   14.62    0.99
  -6   3  -3   11.28    0.85
  -6   3  -4   11.45    0.78
   6  -3   5    0.56    0.16
  -6   3  -5    0.64    0.23
   6  -3   6    0.60    0.15
  -6   3  -6    0.74    0.20
  -6   3  -7    1.04    0.26
  -6   2  13    0.96    0.20
  -6   2  12   11.00    0.64
  -6   2  11    7.83    0.63
  -6   2  11    8.24    0.73
  -6   2  10    0.60    0.33
  -6   2  10    0.19    0.35
  -6   2   9   49.12    1.62
  -6   2   9   48.53    1.80
  -6   2   8    7.06    0.67
  -6   2   8    6.30    0.67
  -6   2   8    7.79    0.71
  -6   2   7   14.57    0.94
  -6   2   7   13.84    0.83
  -6   2   7   13.81    0.72
  -6   2   7   14.34    0.92
  -6   2   6   73.86    1.98
  -6   2   6   76.35    1.73
  -6   2   5    4.16    0.48
  -6   2   5    3.86    0.48
  -6   2   4   14.17    0.82
  -6   2   4   15.62    0.84
  -6   2   3   16.77    0.86
  -6   2   2    2.20    0.39
  -6   2   1   80.04    1.82
  -6   2   0   34.84    1.19
  -6   2  -1   28.65    1.28
  -6   2  -1   27.07    1.03
  -6   2  -2   22.90    1.08
   6  -2   3    6.38    0.57
  -6   2  -3    6.14    0.62
   6  -2   4   38.68    1.38
  -6   2  -4   41.24    1.39
   6  -2   5   21.94    1.02
  -6   2  -5   22.57    0.98
   6  -2   6    4.18    0.41
  -6   2  -7    4.33    0.42
  -6   1  13   11.65    0.59
  -6   1  12   -0.12    0.15
  -6   1  12    0.03    0.22
  -6   1  11   14.08    0.88
  -6   1  11   14.16    0.96
  -6   1  10   17.97    1.02
  -6   1  10   17.31    1.08
  -6   1   9   37.82    1.50
  -6   1   9   39.05    1.62
  -6   1   8   74.88    1.96
  -6   1   8   74.19    2.17
  -6   1   8   71.78    2.13
  -6   1   7   14.46    0.95
  -6   1   7   13.19    0.72
  -6   1   7   13.28    0.83
  -6   1   7   14.16    0.92
  -6   1   6   60.18    1.84
  -6   1   6   62.00    1.53
  -6   1   5    1.37    0.31
  -6   1   5    1.25    0.34
  -6   1   4   54.70    1.66
   6  -1  -3   29.12    0.93
  -6   1   2   33.47    1.15
  -6   1   1   13.76    0.75
  -6   1   0    7.06    0.56
  -6   1  -1   16.24    0.96
  -6   1  -1   15.03    0.76
   6  -1   2   33.77    1.27
  -6   1  -2   34.72    1.35
  -6   1  -2   34.56    1.44
   6  -1   3    6.85    0.65
  -6   1  -3    6.93    0.66
  -6   1  -3    7.10    0.72
   6  -1   4   22.81    1.13
  -6   1  -4   24.02    1.15
   6  -1   5    6.98    0.64
  -6   1  -5    8.09    0.68
   6  -1   6   20.58    0.92
  -6   1  -6   21.56    0.90
  -6   1  -7    5.87    0.36
  -6   1  -7    5.72    0.45
  -6   0  13    6.88    0.42
  -6   0  12    4.28    0.45
  -6   0  12    3.61    0.47
  -6   0  11    2.44    0.47
  -6   0  11    2.37    0.41
  -6   0  10    7.95    0.72
  -6   0  10    7.74    0.75
  -6   0   9   60.66    1.87
  -6   0   9   57.19    1.94
  -6   0   8  160.63    3.22
  -6   0   8  159.77    2.94
  -6   0   8  157.77    3.12
  -6   0   7    2.89    0.40
  -6   0   7    2.16    0.46
  -6   0   7    2.41    0.43
  -6   0   6   73.69    2.07
  -6   0   5   24.85    1.18
  -6   0   4   82.27    2.10
   6   0  -4   80.04    1.72
   6   0  -3  129.06    2.11
   6   0  -2   14.27    0.71
   6   0  -1   23.48    0.89
  -6   0   0   32.11    1.09
  -6   0  -1    8.38    0.69
  -6   0  -1    9.19    0.69
   6   0   2   52.32    1.64
  -6   0  -2   51.88    1.69
  -6   0  -2   53.07    1.75
   6   0   3    0.45    0.27
  -6   0  -3    0.35    0.26
  -6   0  -3    0.48    0.29
   6   0   4    6.53    0.66
  -6   0  -4    6.54    0.67
   6   0   5    9.68    0.77
  -6   0  -5    9.71    0.75
  -6   0  -6   12.66    0.75
  -6   0  -6   11.18    0.72
  -6   0  -7    7.82    0.46
  -6   0  -7    7.71    0.45
  -6  -1  13    9.27    0.52
  -6  -1  13    5.26    0.33
  -6  -1  12   31.75    0.93
  -6  -1  12   33.46    1.17
  -6  -1  11    3.70    0.44
  -6  -1  11    2.99    0.46
  -6  -1  11    2.68    0.49
  -6  -1  10   33.61    1.42
  -6  -1  10   34.24    1.50
  -6  -1   9    1.10    0.32
  -6  -1   9    0.19    0.26
  -6  -1   8  104.16    2.62
  -6  -1   8   99.20    2.38
  -6  -1   8   98.22    2.45
  -6  -1   7   40.84    1.62
  -6  -1   7   40.40    1.50
  -6  -1   6    3.50    0.48
  -6  -1   5   72.05    2.06
   6   1  -4    0.85    0.26
   6   1  -3   44.37    1.34
   6   1  -2   62.39    1.58
   6   1  -1    0.75    0.20
   6   1   0   58.48    1.52
  -6  -1  -1   16.54    0.98
  -6  -1  -1   17.60    0.98
  -6  -1  -2   72.42    2.07
  -6  -1  -2   74.89    2.04
  -6  -1  -2   73.15    2.02
  -6  -1  -3   22.55    1.20
  -6  -1  -3   21.15    1.10
  -6  -1  -3   21.81    1.13
  -6  -1  -4    5.14    0.63
  -6  -1  -4    4.84    0.55
  -6  -1  -5   19.49    1.05
  -6  -1  -5   17.34    0.90
  -6  -1  -6    0.07    0.20
  -6  -1  -6   -0.05    0.11
  -6  -1  -7    4.21    0.35
  -6  -2  13    4.91    0.35
  -6  -2  13    4.65    0.28
  -6  -2  12   26.13    0.88
  -6  -2  12   27.10    1.04
  -6  -2  11    0.12    0.20
  -6  -2  11    0.23    0.26
  -6  -2  11    0.04    0.09
  -6  -2  10    2.26    0.42
  -6  -2  10    1.70    0.43
  -6  -2   9    0.18    0.21
  -6  -2   9    0.14    0.30
  -6  -2   8    0.38    0.27
   6   2  -8    0.48    0.20
  -6  -2   8    0.11    0.35
   6   2  -7    0.82    0.27
  -6  -2   7    1.01    0.33
  -6  -2   6   43.03    1.50
  -6  -2   6   47.48    1.73
  -6  -2   5   64.21    1.98
   6   2  -5   64.20    1.81
   6   2  -4    3.94    0.47
   6   2  -3   38.98    1.36
   6   2  -2   19.03    0.97
   6   2  -1    0.02    0.18
  -6  -2   0   29.85    1.27
   6   2   0   30.07    1.20
  -6  -2   0   28.88    1.18
  -6  -2  -1   12.79    0.91
   6   2   1   13.10    0.75
  -6  -2  -1   11.62    0.83
  -6  -2  -2   14.88    0.97
  -6  -2  -2   15.14    0.91
  -6  -2  -2   15.65    0.94
  -6  -2  -3    0.92    0.37
  -6  -2  -3    0.45    0.17
  -6  -2  -4    6.07    0.65
  -6  -2  -5    3.19    0.46
  -6  -2  -6    1.99    0.33
  -6  -2  -7    0.33    0.13
  -6  -3  13    0.63    0.14
  -6  -3  12   10.51    0.57
  -6  -3  12   10.03    0.60
  -6  -3  11    0.29    0.23
  -6  -3  11    0.30    0.25
  -6  -3  10    2.12    0.43
  -6  -3  10    1.59    0.33
  -6  -3   9    2.82    0.49
  -6  -3   9    2.32    0.46
  -6  -3   8    0.22    0.14
   6   3  -8    0.61    0.27
  -6  -3   8    0.90    0.26
  -6  -3   7    3.37    0.43
   6   3  -7    2.87    0.43
   6   3  -6   19.43    0.94
  -6  -3   6   16.55    0.93
   6   3  -6   18.00    1.04
   6   3  -5   14.29    0.83
  -6  -3   5   14.81    0.91
   6   3  -5   13.06    0.84
   6   3  -4    7.52    0.61
  -6  -3   4    7.44    0.62
   6   3  -4    8.54    0.73
   6   3  -3   21.89    1.01
  -6  -3   3   21.44    1.06
   6   3  -3   20.91    1.07
   6   3  -2    4.27    0.50
  -6  -3   2    4.23    0.49
  -6  -3   1    9.88    0.75
   6   3  -1   10.19    0.74
  -6  -3   0   51.68    1.72
   6   3   0   53.68    1.66
  -6  -3  -1   19.53    1.09
  -6  -3  -1   18.55    0.95
  -6  -3  -2    4.14    0.56
  -6  -3  -3    2.01    0.43
  -6  -3  -4   20.38    1.10
  -6  -3  -5    0.37    0.24
  -6  -3  -6   32.68    1.01
  -6  -4  12    0.35    0.15
  -6  -4  12    0.10    0.17
  -6  -4  11   24.20    0.96
  -6  -4  11   24.52    0.95
  -6  -4  10    0.70    0.26
  -6  -4   9   77.59    2.07
   6   4  -8   21.34    1.05
  -6  -4   8   21.49    1.13
   6   4  -7    0.06    0.10
   6   4  -6   22.86    1.08
   6   4  -5    1.17    0.35
  -6  -4   5    1.22    0.28
   6   4  -4    3.66    0.53
  -6  -4   4    4.60    0.53
   6   4  -4    4.93    0.60
  -6  -4   3  104.93    2.29
   6   4  -3  106.33    2.35
   6   4  -3  112.72    2.57
  -6  -4   2   20.42    1.05
   6   4  -2   24.25    1.19
  -6  -4   1   30.78    1.30
  -6  -4   0    1.15    0.32
  -6  -4  -1   12.24    0.88
  -6  -4  -2   22.24    1.16
  -6  -4  -3    4.37    0.56
  -6  -4  -4   16.14    0.88
  -6  -4  -5    0.08    0.13
  -6  -4  -6    8.06    0.41
  -6  -5  12    8.24    0.39
  -6  -5  11   29.05    0.94
  -6  -5  11   26.24    0.82
  -6  -5  10    4.79    0.45
  -6  -5   9    9.62    0.71
   6   5  -8   35.75    1.35
  -6  -5   8   36.29    1.41
   6   5  -7    3.99    0.51
   6   5  -6   31.23    1.30
   6   5  -5    2.21    0.43
   6   5  -4   69.37    1.97
   6   5  -3   11.37    0.87
   6   5  -2    1.80    0.43
  -6  -5   1    3.60    0.48
  -6  -5   0    0.50    0.20
   6   5   0    0.23    0.24
  -6  -5  -1    0.47    0.20
   6   5   1    0.02    0.10
  -6  -5  -2   26.42    1.13
   6   5   2   21.65    0.91
  -6  -5  -3    0.38    0.18
   6   5   3    0.26    0.10
  -6  -5  -4   10.60    0.61
  -6  -5  -5    0.57    0.12
  -6  -6  11   10.94    0.48
  -6  -6  10   12.57    0.64
  -6  -6  10   11.63    0.53
   6   6  -9    0.43    0.14
  -6  -6   9    0.08    0.12
   6   6  -8   33.67    1.24
   6   6  -8   33.24    0.91
  -6  -6   8   34.38    1.23
   6   6  -7   31.52    1.27
   6   6  -7   30.51    0.96
   6   6  -6   23.42    1.12
   6   6  -6   23.56    0.88
   6   6  -5   27.27    1.22
   6   6  -5   26.76    0.96
   6   6  -4    4.90    0.62
   6   6  -4    4.33    0.47
   6   6  -3   21.17    1.12
   6   6  -3   22.35    0.92
   6   6  -2   18.04    1.04
   6   6  -2   18.33    0.88
   6   6  -1    9.29    0.78
   6   6  -1    8.65    0.61
   6   6   0    6.08    0.62
   6   6   0    6.03    0.51
   6   6   1    0.39    0.15
   6   6   2   15.74    0.69
   6   6   3    0.83    0.13
   6   6   4    1.65    0.23
  -6  -7  10   11.27    0.45
   6   7  -9   10.65    0.39
   6   7  -8   10.02    0.45
  -6  -7   8    9.56    0.52
   6   7  -7   23.42    1.00
   6   7  -7   23.31    0.75
  -6  -7   7   21.74    0.87
   6   7  -6   -0.23    0.23
   6   7  -6    0.03    0.10
   6   7  -5   15.67    0.90
   6   7  -5   15.97    0.70
   6   7  -4   10.98    0.77
   6   7  -4   11.00    0.63
   6   7  -3    2.17    0.46
   6   7  -3    1.61    0.32
   6   7  -2   42.62    1.44
   6   7  -2   39.97    1.16
   6   7  -1    5.17    0.55
   6   7  -1    4.67    0.42
   6   7   0   36.95    1.26
   6   7   0   36.11    1.04
   6   7   1    6.41    0.52
   6   7   1    5.41    0.41
   6   7   2    3.11    0.35
   6   7   2    2.88    0.25
   6   7   3    1.48    0.20
  -6  -8   8    0.28    0.11
   6   8  -7   12.92    0.44
   6   8  -6    1.73    0.31
   6   8  -6    1.75    0.21
   6   8  -5   21.74    0.89
   6   8  -5   22.27    0.71
   6   8  -4   13.83    0.73
   6   8  -4   13.16    0.58
   6   8  -3    1.12    0.28
   6   8  -3    0.99    0.21
   6   8  -2    7.37    0.52
   6   8  -2    6.84    0.42
   6   8  -1    0.06    0.17
   6   8  -1    0.01    0.08
   6   8   0    1.59    0.25
   6   8   0    1.51    0.20
   6   8   1    5.25    0.33
   6   9  -5    0.68    0.17
   6   9  -4   11.05    0.46
   6   9  -4   11.18    0.37
   6   9  -3    4.60    0.31
   6   9  -3    4.36    0.25
   6   9  -2    2.22    0.21
  -7  10   5    1.14    0.18
  -7  10   4    1.69    0.22
  -7  10   3    1.18    0.20
  -7  10   3    1.10    0.21
  -7  10   2   27.94    0.71
  -7  10   2   25.36    0.75
  -7  10   1    5.82    0.33
  -7  10   1    4.91    0.33
  -7  10   0    0.11    0.09
  -7  10   0    0.20    0.10
  -7   9   8    1.05    0.17
  -7   9   7    2.43    0.29
  -7   9   6   -0.04    0.11
  -7   9   6    0.20    0.17
  -7   9   5    0.21    0.17
  -7   9   5   -0.04    0.17
  -7   9   4    5.19    0.44
  -7   9   4    4.90    0.45
  -7   9   3    6.04    0.46
  -7   9   3    5.32    0.51
  -7   9   3    5.52    0.48
  -7   9   2   14.18    0.65
  -7   9   2   13.40    0.76
  -7   9   2   13.08    0.67
  -7   9   1    2.58    0.30
  -7   9   1    2.60    0.37
  -7   9   1    2.54    0.30
  -7   9   0    0.50    0.15
  -7   9   0    0.08    0.18
  -7   9  -1    2.32    0.22
  -7   9  -1    1.63    0.25
  -7   9  -2    0.06    0.10
  -7   8   9   26.50    0.72
  -7   8   8    0.18    0.18
  -7   8   8    0.04    0.09
  -7   8   7   13.10    0.61
  -7   8   7   13.31    0.75
  -7   8   6    3.21    0.39
  -7   8   6    3.22    0.43
  -7   8   5    0.79    0.30
  -7   8   5    1.00    0.28
  -7   8   5    1.10    0.32
  -7   8   5    1.58    0.34
  -7   8   4    2.04    0.37
  -7   8   4    1.92    0.37
  -7   8   4    2.12    0.40
  -7   8   4    2.09    0.40
  -7   8   3    0.33    0.23
  -7   8   3    0.27    0.25
  -7   8   3    0.33    0.20
  -7   8   3    0.08    0.25
  -7   8   2    6.55    0.50
  -7   8   2    6.99    0.67
  -7   8   2    5.33    0.46
  -7   8   2    5.20    0.55
  -7   8   1    2.97    0.36
  -7   8   1    2.36    0.43
  -7   8   1    2.63    0.42
  -7   8   0    0.14    0.16
  -7   8   0    0.24    0.16
  -7   8   0    0.35    0.21
  -7   8   0   -0.08    0.22
  -7   8  -1    9.03    0.48
  -7   8  -1    8.47    0.65
  -7   8  -1    9.61    0.59
  -7   8  -2    1.65    0.31
  -7   8  -2    2.13    0.30
  -7   8  -3    6.39    0.41
  -7   8  -3    7.97    0.42
  -7   7  10    4.09    0.28
  -7   7  10    4.87    0.35
  -7   7   9    2.32    0.30
  -7   7   9    2.01    0.25
  -7   7   9    2.29    0.30
  -7   7   8   12.75    0.57
  -7   7   8   12.38    0.74
  -7   7   8   10.79    0.64
  -7   7   7    0.21    0.13
  -7   7   7    0.20    0.27
  -7   7   7   -0.29    0.16
  -7   7   6    1.50    0.33
  -7   7   6    2.19    0.46
  -7   7   6    1.90    0.40
  -7   7   5   15.08    0.82
  -7   7   5   15.83    0.92
  -7   7   5   15.48    1.01
  -7   7   5   15.66    0.95
  -7   7   4   18.24    0.88
  -7   7   4   17.85    1.02
  -7   7   4   17.12    1.04
  -7   7   4   18.43    1.05
  -7   7   3    4.20    0.46
  -7   7   3    3.96    0.55
  -7   7   3    3.49    0.51
  -7   7   3    4.56    0.57
  -7   7   2    1.22    0.31
  -7   7   2    1.11    0.38
  -7   7   2    1.19    0.36
  -7   7   2    1.15    0.38
  -7   7   1    1.93    0.32
  -7   7   1    2.15    0.45
  -7   7   1    2.45    0.43
  -7   7   1    1.93    0.36
  -7   7   0    9.85    0.59
  -7   7   0    9.96    0.76
  -7   7   0    9.69    0.71
  -7   7   0    9.34    0.81
  -7   7  -1    0.57    0.19
  -7   7  -1    0.49    0.33
  -7   7  -1    1.07    0.27
  -7   7  -1    0.38    0.24
  -7   7  -2   16.84    0.95
  -7   7  -2   14.93    0.72
  -7   7  -3    2.60    0.39
  -7   7  -3    3.33    0.36
  -7   7  -4    1.72    0.26
  -7   7  -4    1.93    0.23
  -7   6  11    0.32    0.09
  -7   6  11    0.65    0.17
  -7   6  10    6.17    0.41
  -7   6  10    6.72    0.52
  -7   6  10    5.89    0.39
  -7   6   9    1.51    0.30
  -7   6   9    1.62    0.36
  -7   6   8   10.99    0.79
  -7   6   8   10.63    0.77
  -7   6   7   22.48    0.92
  -7   6   7   23.47    1.20
  -7   6   7   23.20    1.08
  -7   6   6    3.12    0.44
  -7   6   6    3.05    0.52
  -7   6   6    3.09    0.47
  -7   6   5  117.96    2.20
  -7   6   5  111.62    2.47
  -7   6   5  117.56    2.83
  -7   6   5  114.71    2.59
  -7   6   4   10.38    0.69
  -7   6   4   10.73    0.84
  -7   6   4   10.59    0.88
  -7   6   4   10.91    0.85
  -7   6   3   31.06    1.10
  -7   6   3   29.70    1.41
  -7   6   3   30.22    1.42
  -7   6   3   30.10    1.39
  -7   6   2   17.81    0.84
  -7   6   2   17.24    1.11
  -7   6   2   15.60    1.00
  -7   6   2   18.17    1.09
  -7   6   2   18.55    0.94
  -7   6   1    1.85    0.36
  -7   6   1    1.56    0.40
  -7   6   1    1.22    0.42
  -7   6   1    1.74    0.32
  -7   6   0    9.23    0.81
  -7   6   0    9.02    0.67
  -7   6  -1    0.40    0.33
  -7   6  -1    0.49    0.24
  -7   6  -2   27.71    1.07
  -7   6  -2   27.20    1.04
  -7   6  -3    0.35    0.20
  -7   6  -3    0.35    0.18
  -7   6  -3    0.03    0.18
  -7   6  -4    0.56    0.17
  -7   6  -4    0.39    0.16
  -7   6  -5    0.68    0.14
  -7   5  12   10.92    0.48
  -7   5  12    9.06    0.40
  -7   5  11    0.22    0.20
  -7   5  11    0.88    0.21
  -7   5  10    7.41    0.49
  -7   5  10    8.27    0.65
  -7   5  10    7.40    0.56
  -7   5  10    8.52    0.59
  -7   5   9    3.01    0.42
  -7   5   9    3.00    0.44
  -7   5   8    2.78    0.49
  -7   5   7    8.93    0.77
  -7   5   7    8.74    0.69
  -7   5   6    3.79    0.45
  -7   5   6    4.31    0.62
  -7   5   6    4.26    0.52
  -7   5   5   11.83    0.72
  -7   5   5   11.11    0.79
  -7   5   5   10.69    0.89
  -7   5   5   11.51    0.84
  -7   5   4   11.51    0.71
  -7   5   4   10.86    0.83
  -7   5   4   11.19    0.95
  -7   5   4   11.40    0.85
  -7   5   3    3.92    0.42
  -7   5   3    4.16    0.51
  -7   5   3    3.55    0.55
  -7   5   3    3.32    0.54
  -7   5   2   49.48    1.76
  -7   5   2   52.96    1.85
  -7   5   2   52.45    1.45
  -7   5   1    1.43    0.38
  -7   5   1    2.12    0.47
  -7   5   1    2.20    0.40
  -7   5   1    2.21    0.39
  -7   5   0   53.16    1.64
  -7   5   0   57.34    1.93
  -7   5   0   53.13    1.54
  -7   5   0   55.92    1.69
  -7   5  -1    1.90    0.46
  -7   5  -1    1.55    0.32
  -7   5  -1    1.64    0.39
  -7   5  -2   35.45    1.43
  -7   5  -2   33.55    1.17
  -7   5  -2   35.84    1.35
  -7   5  -3    6.06    0.59
  -7   5  -3    5.87    0.51
  -7   5  -3    6.67    0.59
  -7   5  -4    3.72    0.39
  -7   5  -4    2.97    0.34
  -7   5  -4    3.78    0.43
  -7   5  -5    2.47    0.30
  -7   4  12   14.13    0.63
  -7   4  12   14.19    0.65
  -7   4  11    1.47    0.31
  -7   4  10   18.18    0.97
  -7   4   9   30.38    1.18
  -7   4   9   29.67    1.30
  -7   4   8    3.23    0.50
  -7   4   8    3.71    0.52
  -7   4   8    3.92    0.45
  -7   4   7    1.89    0.42
  -7   4   7    2.50    0.45
  -7   4   7    2.07    0.35
  -7   4   6    6.69    0.71
  -7   4   6    6.74    0.61
  -7   4   6    5.16    0.60
  -7   4   5    1.01    0.32
  -7   4   5    0.43    0.23
  -7   4   5    0.30    0.24
  -7   4   5    0.28    0.28
  -7   4   5    1.04    0.31
  -7   4   4   14.61    0.73
  -7   4   4   12.99    0.83
  -7   4   4   15.17    1.03
  -7   4   4   14.65    0.91
  -7   4   4   14.89    0.96
  -7   4   3    3.84    0.54
  -7   4   2   17.27    0.95
  -7   4   2   17.55    1.04
  -7   4   2   16.23    0.95
  -7   4   1   13.79    0.87
  -7   4   1   15.19    1.01
  -7   4   1   13.84    0.88
  -7   4   0    3.18    0.50
  -7   4   0    3.57    0.54
  -7   4  -1    4.29    0.57
  -7   4  -1    3.81    0.57
  -7   4  -2    0.71    0.28
  -7   4  -3   15.83    0.97
  -7   4  -4    2.92    0.42
  -7   4  -4    2.85    0.44
  -7   4  -5    0.68    0.19
  -7   4  -5    1.14    0.27
  -7   4  -6    4.25    0.35
  -7   3  13    1.04    0.17
  -7   3  12   11.69    0.62
  -7   3  12   11.49    0.65
  -7   3  11    9.71    0.73
  -7   3  10   24.15    1.21
  -7   3   9   41.73    1.37
  -7   3   9   43.74    1.66
  -7   3   8    0.77    0.33
  -7   3   8    0.51    0.19
  -7   3   7   32.42    1.41
  -7   3   7   29.97    1.18
  -7   3   7   29.36    1.37
  -7   3   6   32.37    1.45
  -7   3   6   32.74    1.22
  -7   3   6   31.29    1.24
  -7   3   6   32.40    1.38
  -7   3   5   36.23    1.37
  -7   3   5   37.81    1.35
  -7   3   5   36.61    1.38
  -7   3   4   77.62    1.90
  -7   3   4   83.04    2.06
  -7   3   3    0.24    0.20
  -7   3   3    0.37    0.22
  -7   3   2    2.39    0.43
  -7   3   2    1.75    0.39
  -7   3   2    1.26    0.41
  -7   3   1   10.90    0.82
  -7   3   1   10.20    0.77
  -7   3   1   11.95    0.84
  -7   3   0   17.37    1.05
  -7   3   0   15.95    1.04
  -7   3  -1   18.29    1.09
  -7   3  -1   18.04    1.08
  -7   3  -2   21.18    1.17
  -7   3  -2   19.75    1.14
  -7   3  -3   13.08    0.92
  -7   3  -4    6.02    0.63
  -7   3  -5    0.43    0.21
  -7   3  -6    8.57    0.50
  -7   2  13    3.56    0.31
  -7   2  12   -0.10    0.13
  -7   2  12   -0.12    0.17
  -7   2  11    7.36    0.56
  -7   2  11    7.51    0.68
  -7   2  10    2.26    0.45
  -7   2  10    2.88    0.53
  -7   2   9   25.00    1.12
  -7   2   9   25.80    1.33
  -7   2   8   33.45    1.31
  -7   2   8   35.33    1.31
  -7   2   8   36.77    1.57
  -7   2   7    3.50    0.45
  -7   2   7    4.00    0.49
  -7   2   7    3.96    0.54
  -7   2   6   10.84    0.88
  -7   2   6   10.80    0.76
  -7   2   5    1.73    0.35
  -7   2   5    2.04    0.42
  -7   2   4   36.16    1.34
  -7   2   4   39.12    1.41
  -7   2   3    1.82    0.38
  -7   2   3    2.00    0.39
  -7   2   3    1.46    0.37
  -7   2   3    1.45    0.39
  -7   2   2    3.83    0.50
  -7   2   2    3.66    0.48
  -7   2   2    3.96    0.53
  -7   2   1   12.54    0.83
  -7   2   1   13.21    0.86
  -7   2   1   13.43    0.91
  -7   2   0    5.61    0.54
  -7   2   0    5.21    0.60
  -7   2   0    5.18    0.56
  -7   2   0    5.29    0.61
  -7   2  -1    4.71    0.51
  -7   2  -1    4.39    0.63
  -7   2  -1    4.86    0.63
  -7   2  -2   12.70    0.82
  -7   2  -2   11.86    0.94
  -7   2  -2   12.27    0.95
  -7   2  -3    0.58    0.23
  -7   2  -3    0.48    0.24
  -7   2  -3   -0.01    0.25
  -7   2  -4    0.93    0.23
  -7   2  -4    0.63    0.30
  -7   2  -5    7.58    0.60
  -7   2  -6    3.13    0.33
  -7   1  13    3.52    0.31
  -7   1  12    3.80    0.34
  -7   1  12    4.37    0.41
  -7   1  12    4.54    0.48
  -7   1  11    2.54    0.40
  -7   1  11    0.99    0.37
  -7   1  10    5.09    0.57
  -7   1  10    5.44    0.65
  -7   1   9    7.62    0.70
  -7   1   9    7.46    0.73
  -7   1   8   30.20    1.29
  -7   1   8   29.65    1.43
  -7   1   7    1.21    0.44
  -7   1   7    0.87    0.30
  -7   1   7    2.01    0.32
  -7   1   7    0.86    0.29
  -7   1   7    0.99    0.35
  -7   1   6    6.53    0.66
  -7   1   6    6.10    0.59
  -7   1   6    5.93    0.66
  -7   1   5    5.09    0.60
  -7   1   5    4.60    0.54
  -7   1   4   51.74    1.64
  -7   1   4   54.00    1.63
  -7   1   3   31.92    1.28
  -7   1   3   33.83    1.29
  -7   1   3   30.65    1.30
  -7   1   2    6.13    0.63
  -7   1   2    6.70    0.61
  -7   1   2    6.56    0.63
  -7   1   1   87.46    2.14
  -7   1   1   92.10    2.05
  -7   1   1   87.91    2.23
  -7   1   0   43.05    1.52
  -7   1   0   43.29    1.37
  -7   1   0   43.71    1.62
  -7   1  -1   10.37    0.81
  -7   1  -1   11.74    0.89
  -7   1  -1   11.44    0.87
  -7   1  -2   48.41    1.64
  -7   1  -2   50.71    1.78
  -7   1  -2   50.13    1.80
  -7   1  -3    1.64    0.33
  -7   1  -3    1.57    0.39
  -7   1  -3    1.88    0.45
  -7   1  -4    3.40    0.45
  -7   1  -4    3.40    0.48
  -7   1  -5   28.98    0.96
  -7   1  -5   29.96    1.13
  -7   1  -6    5.36    0.39
  -7   0  13   10.32    0.48
  -7   0  12   27.61    1.01
  -7   0  12   26.06    1.05
  -7   0  11    5.60    0.59
  -7   0  11    4.16    0.52
  -7   0  10   21.95    1.11
  -7   0  10   22.75    1.19
  -7   0   9    0.52    0.23
  -7   0   9    0.43    0.34
  -7   0   8   48.84    1.67
  -7   0   8   47.31    1.78
  -7   0   7   39.49    1.30
  -7   0   7   41.36    1.50
  -7   0   7   40.38    1.59
  -7   0   6    1.72    0.41
   7   0  -6    1.14    0.30
  -7   0   6    2.38    0.43
  -7   0   5  128.78    2.66
   7   0  -5  113.58    2.24
   7   0  -4    1.38    0.33
  -7   0   4    2.44    0.44
  -7   0   3   28.37    1.26
  -7   0   2   26.15    1.20
  -7   0   2   27.97    1.14
  -7   0   2   25.45    1.21
  -7   0   1   13.62    0.89
  -7   0   1   14.29    0.83
  -7   0   1   14.26    0.97
  -7   0   0   71.47    2.03
  -7   0   0   67.79    1.68
  -7   0   0   72.35    2.09
  -7   0  -1    3.26    0.47
  -7   0  -1    2.83    0.48
  -7   0  -1    2.70    0.54
  -7   0  -2   31.58    1.39
  -7   0  -2   33.31    1.41
  -7   0  -2   33.38    1.45
  -7   0  -3    6.93    0.65
  -7   0  -3    6.63    0.67
  -7   0  -4    7.16    0.64
  -7   0  -4    7.01    0.61
  -7   0  -5   38.41    1.17
  -7   0  -5   37.37    1.17
  -7   0  -6    0.34    0.13
  -7   0  -6    0.09    0.08
  -7  -1  13   -0.01    0.04
  -7  -1  13   -0.02    0.12
  -7  -1  12   10.23    0.63
  -7  -1  12   10.23    0.64
  -7  -1  11    0.21    0.09
  -7  -1  11    0.26    0.23
  -7  -1  11   -0.19    0.17
  -7  -1  10    6.92    0.69
  -7  -1  10    7.28    0.71
  -7  -1   9    1.91    0.41
  -7  -1   9    1.74    0.44
  -7  -1   8    0.34    0.25
  -7  -1   8    0.67    0.28
  -7  -1   8    0.08    0.33
  -7  -1   7    8.93    0.75
  -7  -1   6   34.89    1.45
   7   1  -6   32.59    1.30
  -7  -1   5   49.17    1.69
   7   1  -5   47.37    1.52
  -7  -1   4   36.75    1.45
   7   1  -4   34.19    1.29
   7   1  -3    1.38    0.35
  -7  -1   3    1.27    0.34
  -7  -1   2   29.35    1.31
   7   1  -2   25.46    1.08
  -7  -1   2   28.52    1.28
  -7  -1   1    6.79    0.68
  -7  -1   1    5.59    0.63
  -7  -1   0   39.26    1.56
  -7  -1   0   39.33    1.54
  -7  -1  -1    0.16    0.30
  -7  -1  -1    0.20    0.25
  -7  -1  -1    0.04    0.26
  -7  -1  -2    1.39    0.37
  -7  -1  -2    2.01    0.36
  -7  -1  -2    0.79    0.32
  -7  -1  -3    0.81    0.34
  -7  -1  -3    0.86    0.26
  -7  -1  -4    2.04    0.40
  -7  -1  -4    2.33    0.37
  -7  -1  -5    3.48    0.39
  -7  -1  -5    2.89    0.30
  -7  -1  -6    1.89    0.23
  -7  -2  13    0.26    0.12
  -7  -2  12   13.06    0.54
  -7  -2  12   13.87    0.68
  -7  -2  11   10.60    0.61
  -7  -2  11   11.10    0.74
  -7  -2  11   10.76    0.70
  -7  -2  10    9.94    0.76
  -7  -2  10    9.61    0.74
  -7  -2   9    1.75    0.39
  -7  -2   9    1.76    0.43
  -7  -2   8    3.70    0.54
  -7  -2   8    3.58    0.49
  -7  -2   7    1.56    0.33
  -7  -2   6    3.76    0.51
   7   2  -5   26.04    1.06
  -7  -2   5   25.70    1.24
   7   2  -5   24.48    1.17
   7   2  -4   26.57    1.08
  -7  -2   4   28.06    1.28
   7   2  -4   27.18    1.21
   7   2  -3    1.28    0.32
  -7  -2   3    1.11    0.28
  -7  -2   2   11.74    0.88
   7   2  -2   11.16    0.75
  -7  -2   1    5.84    0.61
  -7  -2   1    5.64    0.59
  -7  -2   0   34.85    1.47
  -7  -2   0   33.17    1.37
  -7  -2  -1    9.40    0.84
  -7  -2  -1    9.75    0.73
  -7  -2  -1    9.14    0.76
  -7  -2  -2    1.64    0.38
  -7  -2  -2    1.79    0.38
  -7  -2  -3    9.68    0.74
  -7  -2  -3    9.92    0.67
  -7  -2  -4    2.66    0.39
  -7  -2  -5   10.54    0.59
  -7  -3  12   14.21    0.55
  -7  -3  12   13.71    0.61
  -7  -3  11   19.23    0.80
  -7  -3  11   19.75    0.88
  -7  -3  10    5.80    0.57
  -7  -3  10    7.19    0.56
  -7  -3   9   13.16    0.90
  -7  -3   9   13.61    0.83
   7   3  -8   16.08    0.87
  -7  -3   8   15.83    1.00
  -7  -3   8   15.47    0.91
   7   3  -7   34.51    1.26
  -7  -3   7   34.79    1.38
   7   3  -6    9.80    0.69
  -7  -3   6    9.98    0.78
   7   3  -5   36.32    1.33
  -7  -3   5   35.06    1.42
   7   3  -4    7.90    0.68
  -7  -3   4    7.94    0.74
   7   3  -3    2.83    0.45
  -7  -3   3    2.83    0.48
  -7  -3   2   19.09    1.08
  -7  -3   1   26.45    1.28
  -7  -3   0    0.87    0.30
  -7  -3  -1   12.76    0.90
  -7  -3  -2   28.46    1.28
  -7  -3  -3    6.25    0.60
  -7  -3  -4    8.10    0.57
  -7  -3  -5    0.44    0.14
  -7  -4  12    0.29    0.11
  -7  -4  12    0.18    0.10
  -7  -4  11   31.89    0.97
  -7  -4  11   31.27    0.98
  -7  -4  10    6.02    0.54
  -7  -4   9    4.28    0.52
   7   4  -8   72.67    1.80
  -7  -4   8   71.64    2.00
   7   4  -7    0.08    0.22
   7   4  -6    7.70    0.64
  -7  -4   6    6.93    0.62
   7   4  -5    0.57    0.26
  -7  -4   5    0.05    0.09
   7   4  -4    0.72    0.30
  -7  -4   4    0.70    0.28
   7   4  -3    1.87    0.40
  -7  -4   3    1.91    0.37
   7   4  -2    7.27    0.67
  -7  -4   2    7.00    0.65
  -7  -4   1    2.76    0.45
  -7  -4   0    0.51    0.27
  -7  -4  -1    1.18    0.31
  -7  -4  -2    5.76    0.54
  -7  -4  -3    0.55    0.22
  -7  -4  -4    4.48    0.37
  -7  -5  11   18.56    0.64
  -7  -5  11   16.73    0.57
  -7  -5  10   14.31    0.68
  -7  -5   9    0.21    0.16
   7   5  -8   59.37    1.58
  -7  -5   8   55.61    1.65
   7   5  -7    2.36    0.39
   7   5  -6   11.10    0.77
   7   5  -5   42.61    1.48
   7   5  -4   -0.04    0.34
   7   5  -3   73.87    1.98
  -7  -5   3   69.30    1.79
   7   5  -2   18.87    1.03
  -7  -5   2   17.07    0.92
   7   5  -1   25.83    1.18
  -7  -5   1   24.62    1.09
   7   5   0    9.07    0.70
  -7  -5   0   10.89    0.73
  -7  -5  -1    1.80    0.32
  -7  -5  -2    3.79    0.40
   7   5   3    0.72    0.19
  -7  -5  -3    0.99    0.18
   7   5   4    3.44    0.23
  -7  -6  10    0.59    0.16
  -7  -6  10    0.99    0.14
  -7  -6   9    1.51    0.23
   7   6  -8    8.08    0.57
  -7  -6   8    7.56    0.55
   7   6  -7   14.12    0.77
   7   6  -6    0.63    0.26
   7   6  -5   30.59    1.20
   7   6  -4    6.42    0.60
   7   6  -3   14.31    0.84
   7   6  -2   23.26    1.06
   7   6  -1    4.05    0.48
   7   6   0   34.50    1.17
   7   6   1    5.10    0.44
   7   6   2    5.85    0.40
  -7  -7   9    7.87    0.37
  -7  -7   8   -0.08    0.07
   7   7  -7   23.47    0.85
  -7  -7   7   21.18    0.75
   7   7  -6    4.13    0.42
   7   7  -5   12.40    0.69
   7   7  -4   15.28    0.78
   7   7  -3    3.80    0.42
   7   7  -2   12.54    0.68
   7   7  -1    0.60    0.22
   7   7   0   12.70    0.59
   7   7   1    6.67    0.36
   7   8  -6    2.62    0.26
   7   8  -5    0.54    0.17
   7   8  -4    9.91    0.49
   7   8  -3    0.10    0.12
   7   8  -2    4.34    0.31
   7   8  -1    1.46    0.17
  -8   9   7   15.40    0.47
  -8   9   6    1.12    0.15
  -8   9   6    1.11    0.18
  -8   9   5   -0.02    0.10
  -8   9   5    0.33    0.12
  -8   9   4    7.21    0.43
  -8   9   4    6.21    0.33
  -8   9   3    1.66    0.25
  -8   9   2    1.52    0.26
  -8   9   2    1.08    0.19
  -8   9   1    6.05    0.40
  -8   9   0    0.80    0.16
  -8   8   8    2.96    0.29
  -8   8   7    0.13    0.08
  -8   8   7    0.24    0.18
  -8   8   6   10.68    0.53
  -8   8   6   11.04    0.63
  -8   8   5    4.22    0.41
  -8   8   5    4.46    0.43
  -8   8   5    4.83    0.46
  -8   8   4    8.41    0.58
  -8   8   4    8.10    0.56
  -8   8   4    9.74    0.65
  -8   8   3    2.53    0.30
  -8   8   3    2.48    0.38
  -8   8   3    1.75    0.29
  -8   8   3    2.28    0.35
  -8   8   2    3.46    0.32
  -8   8   2    3.24    0.38
  -8   8   2    3.45    0.41
  -8   8   1    6.67    0.36
  -8   8   1    6.56    0.53
  -8   8   1    6.94    0.50
  -8   8   0    0.22    0.19
  -8   8   0    0.09    0.15
  -8   8  -1    3.56    0.35
  -8   7   9    1.44    0.23
  -8   7   9    1.48    0.17
  -8   7   8    2.19    0.32
  -8   7   7    4.90    0.37
  -8   7   7    5.29    0.52
  -8   7   6    0.96    0.22
  -8   7   6    1.25    0.31
  -8   7   6    1.30    0.29
  -8   7   5   17.20    0.84
  -8   7   5   17.35    0.97
  -8   7   5   17.99    0.94
  -8   7   4    0.74    0.25
  -8   7   4    0.35    0.24
  -8   7   4    0.77    0.29
  -8   7   4    0.42    0.29
  -8   7   3   16.24    0.70
  -8   7   3   14.49    0.88
  -8   7   3   14.64    0.84
  -8   7   3   15.81    0.93
  -8   7   2    0.86    0.21
  -8   7   2    0.72    0.29
  -8   7   2    0.68    0.20
  -8   7   2    0.99    0.33
  -8   7   1    3.53    0.48
  -8   7   1    3.93    0.48
  -8   7   0    2.23    0.38
  -8   7   0    2.41    0.38
  -8   7  -1    1.58    0.30
  -8   7  -1    1.70    0.28
  -8   7  -2    0.40    0.19
  -8   7  -2    0.25    0.11
  -8   7  -3    0.92    0.18
  -8   6  11    0.10    0.10
  -8   6  10    4.31    0.30
  -8   6  10    4.63    0.38
  -8   6   9    0.20    0.18
  -8   6   9    0.46    0.19
  -8   6   8    0.42    0.22
  -8   6   8    0.42    0.24
  -8   6   7   10.88    0.80
  -8   6   7   11.14    0.70
  -8   6   6    9.40    0.62
  -8   6   6   10.89    0.84
  -8   6   6   10.17    0.73
  -8   6   5   14.25    0.83
  -8   6   5   16.01    1.03
  -8   6   5   15.45    0.92
  -8   6   4   22.60    0.89
  -8   6   4   21.84    1.10
  -8   6   4   21.65    1.19
  -8   6   4   23.34    1.16
  -8   6   3    0.80    0.25
  -8   6   3    1.26    0.36
  -8   6   3    0.92    0.34
  -8   6   3    0.97    0.32
  -8   6   2   36.77    1.49
  -8   6   2   34.86    1.35
  -8   6   1    8.07    0.73
  -8   6   1    8.68    0.75
  -8   6   0   16.09    0.93
  -8   6   0   15.40    0.69
  -8   6  -1    0.01    0.21
  -8   6  -1   -0.25    0.16
  -8   6  -2   12.53    0.66
  -8   6  -3    9.48    0.55
  -8   6  -3    8.00    0.38
  -8   5  11    0.29    0.16
  -8   5  11    0.05    0.08
  -8   5  10    5.09    0.37
  -8   5  10    5.14    0.42
  -8   5   9    2.40    0.35
  -8   5   9    2.51    0.35
  -8   5   8    0.27    0.21
  -8   5   7   45.62    1.67
  -8   5   7   46.72    1.44
  -8   5   6    1.11    0.35
  -8   5   6    1.12    0.29
  -8   5   5    9.53    0.68
  -8   5   5    9.03    0.86
  -8   5   5   10.21    0.78
  -8   5   4    4.43    0.55
  -8   5   4    6.15    0.72
  -8   5   4    5.86    0.63
  -8   5   3   -0.01    0.19
  -8   5   3    0.27    0.29
  -8   5   3   -0.15    0.31
  -8   5   2   19.26    1.10
  -8   5   2   19.96    1.15
  -8   5   1   32.13    1.30
  -8   5   1   35.11    1.49
  -8   5   1   32.43    1.27
  -8   5   0    8.73    0.77
  -8   5   0    7.79    0.67
  -8   5  -1   14.44    0.92
  -8   5  -1   15.86    0.86
  -8   5  -2    5.38    0.52
  -8   5  -2    4.92    0.48
  -8   5  -3   12.20    0.62
  -8   5  -3   12.92    0.64
  -8   5  -4    2.30    0.24
  -8   4  12    4.24    0.31
  -8   4  12    3.31    0.27
  -8   4  11   10.54    0.62
  -8   4  11    9.52    0.56
  -8   4  10    5.49    0.40
  -8   4  10    6.10    0.54
  -8   4   9   25.42    1.04
  -8   4   9   26.42    1.14
  -8   4   8    1.07    0.36
  -8   4   8    0.88    0.39
  -8   4   7   31.79    1.41
  -8   4   7   31.13    1.17
  -8   4   7   31.43    1.33
  -8   4   6    1.07    0.36
  -8   4   6    0.98    0.37
  -8   4   6    1.12    0.28
  -8   4   5    8.72    0.86
  -8   4   5    9.40    0.72
  -8   4   5    9.71    0.76
  -8   4   4   21.41    1.07
  -8   4   4   24.69    1.34
  -8   4   4   22.82    1.17
  -8   4   3    8.96    0.80
  -8   4   3    8.16    0.76
  -8   4   2   19.46    1.14
  -8   4   2   19.48    1.02
  -8   4   2   18.82    1.13
  -8   4   1   17.52    1.04
  -8   4   1   14.96    0.93
  -8   4   1   16.92    1.06
  -8   4   1   15.32    0.96
  -8   4   0    2.98    0.48
  -8   4   0    2.65    0.45
  -8   4   0    3.18    0.54
  -8   4   0    3.02    0.43
  -8   4  -1    2.43    0.51
  -8   4  -1    2.48    0.47
  -8   4  -2    3.61    0.49
  -8   4  -2    4.15    0.52
  -8   4  -3    4.01    0.45
  -8   4  -3    3.89    0.45
  -8   4  -4   18.12    0.67
  -8   4  -4   20.80    0.77
  -8   3  12    0.15    0.10
  -8   3  12    0.15    0.12
  -8   3  11   23.44    0.98
  -8   3  10    1.71    0.37
  -8   3   9   44.66    1.39
  -8   3   9   49.05    1.67
  -8   3   8   14.04    0.89
  -8   3   8   15.10    0.98
  -8   3   7    1.31    0.41
  -8   3   7    1.47    0.39
  -8   3   7    1.67    0.43
  -8   3   6   19.59    1.17
  -8   3   6   20.15    0.96
  -8   3   6   21.88    1.11
  -8   3   6   19.75    1.12
  -8   3   5    6.77    0.67
  -8   3   5    8.27    0.79
  -8   3   5    7.40    0.64
  -8   3   5    6.89    0.70
  -8   3   4   38.54    1.43
  -8   3   4   37.53    1.43
  -8   3   4   40.96    1.55
  -8   3   3   16.14    0.95
  -8   3   3   14.93    0.95
  -8   3   3   16.71    1.01
  -8   3   2    0.79    0.30
  -8   3   2    0.19    0.26
  -8   3   2   -0.01    0.20
  -8   3   2   -0.30    0.22
  -8   3   2    0.21    0.29
  -8   3   1    6.41    0.67
  -8   3   1    6.89    0.69
  -8   3   1    5.67    0.64
  -8   3   0    0.47    0.32
  -8   3   0    0.89    0.30
  -8   3  -1    0.77    0.35
  -8   3  -2    4.34    0.57
  -8   3  -3    0.10    0.19
  -8   3  -4    6.70    0.48
  -8   3  -4    7.20    0.53
  -8   3  -5    1.40    0.20
  -8   2  12    0.10    0.11
  -8   2  12    0.10    0.16
  -8   2  11    5.58    0.42
  -8   2  11    6.86    0.60
  -8   2  10    8.21    0.55
  -8   2  10    7.93    0.72
  -8   2   9   18.08    1.07
  -8   2   8   18.71    1.00
  -8   2   8   21.65    1.20
  -8   2   7    1.39    0.41
  -8   2   7    1.79    0.38
  -8   2   7    1.58    0.41
  -8   2   6   17.02    0.96
  -8   2   5    0.31    0.24
  -8   2   5   -0.38    0.23
  -8   2   5    0.33    0.29
  -8   2   4   45.64    1.61
  -8   2   4   44.13    1.51
  -8   2   3    1.57    0.34
  -8   2   3    1.93    0.40
  -8   2   3    1.58    0.38
  -8   2   2    0.85    0.34
  -8   2   2    0.28    0.28
  -8   2   2    0.85    0.36
  -8   2   1    9.14    0.74
  -8   2   1   10.49    0.84
  -8   2   1   10.09    0.72
  -8   2   1    9.65    0.84
  -8   2   0    6.99    0.68
  -8   2   0    7.27    0.72
  -8   2   0    7.43    0.75
  -8   2  -1   28.47    1.17
  -8   2  -1   29.01    1.32
  -8   2  -1   29.38    1.36
  -8   2  -2    5.65    0.53
  -8   2  -2    6.56    0.64
  -8   2  -3    0.21    0.22
  -8   2  -4    4.07    0.41
  -8   2  -5    0.15    0.12
  -8   2  -5    0.33    0.13
  -8   1  13    5.72    0.32
  -8   1  12    5.57    0.38
  -8   1  12    5.84    0.47
  -8   1  11    2.07    0.33
  -8   1  11    2.02    0.36
  -8   1  10    0.80    0.35
  -8   1  10    0.77    0.22
  -8   1   9    2.48    0.46
  -8   1   9    2.27    0.44
  -8   1   8    8.59    0.67
  -8   1   8    8.93    0.67
  -8   1   8    9.36    0.72
  -8   1   8    9.88    0.84
  -8   1   7   19.78    1.07
  -8   1   7   18.40    0.95
  -8   1   7   18.34    0.96
  -8   1   7   19.98    1.17
  -8   1   6   12.11    0.89
  -8   1   6   11.78    0.82
  -8   1   5   26.07    1.28
  -8   1   5   28.21    1.24
  -8   1   4    6.76    0.70
  -8   1   4    7.25    0.69
  -8   1   3   25.66    1.26
  -8   1   3   24.90    1.14
  -8   1   3   28.96    1.25
  -8   1   2   26.14    1.29
  -8   1   2   26.51    1.19
  -8   1   2   26.15    1.32
  -8   1   1    5.91    0.67
  -8   1   1    6.28    0.60
  -8   1   1    6.30    0.71
  -8   1   0   30.85    1.35
  -8   1   0   31.83    1.42
  -8   1   0   31.13    1.42
  -8   1  -1    0.66    0.29
  -8   1  -1    0.32    0.29
  -8   1  -1    0.67    0.27
  -8   1  -2    2.02    0.36
  -8   1  -2    2.12    0.43
  -8   1  -3   19.13    0.86
  -8   1  -3   20.61    0.99
  -8   1  -4   -0.05    0.14
  -8   1  -4    0.03    0.13
  -8   1  -5    6.25    0.35
  -8   1  -5    6.48    0.34
  -8   0  12   15.68    0.65
  -8   0  12   16.23    0.74
  -8   0  11    9.36    0.62
  -8   0  11    9.25    0.69
  -8   0  10    4.52    0.50
  -8   0  10    4.26    0.54
  -8   0   9    3.72    0.51
  -8   0   9    3.52    0.51
  -8   0   8    5.73    0.57
  -8   0   8    5.94    0.62
  -8   0   8    6.01    0.70
  -8   0   7   35.59    1.31
  -8   0   7   35.83    1.37
  -8   0   7   36.79    1.56
  -8   0   6    3.42    0.57
  -8   0   6    3.57    0.48
  -8   0   5   12.95    0.95
  -8   0   5   14.29    0.90
  -8   0   4   42.71    1.63
  -8   0   4   45.16    1.54
  -8   0   3    2.07    0.46
  -8   0   3    2.34    0.42
  -8   0   2   39.84    1.60
  -8   0   2   40.75    1.43
  -8   0   1    0.42    0.33
  -8   0   1    0.83    0.28
  -8   0   1    0.53    0.35
  -8   0   0   47.23    1.70
  -8   0   0   48.29    1.68
  -8   0   0   47.66    1.74
  -8   0  -1    0.70    0.28
  -8   0  -1    0.60    0.29
  -8   0  -2    0.44    0.26
  -8   0  -2    0.13    0.24
  -8   0  -3   29.03    1.10
  -8   0  -3   28.50    1.09
  -8   0  -4    2.25    0.28
  -8   0  -4    1.69    0.26
  -8  -1  12    8.70    0.49
  -8  -1  12    8.07    0.51
  -8  -1  11    3.82    0.43
  -8  -1  11    3.96    0.44
  -8  -1  10   13.81    0.82
  -8  -1  10   12.81    0.83
  -8  -1   9   27.04    1.20
  -8  -1   9   27.43    1.27
  -8  -1   8   11.46    0.73
  -8  -1   8   14.06    0.93
  -8  -1   8   14.61    0.98
  -8  -1   7   26.30    1.10
  -8  -1   7   27.50    1.31
  -8  -1   6   -0.09    0.22
  -8  -1   5    2.46    0.47
  -8  -1   4    7.64    0.72
  -8  -1   3   11.56    0.90
  -8  -1   3   12.61    0.81
  -8  -1   2    1.99    0.45
  -8  -1   2    1.72    0.35
  -8  -1   1    1.93    0.43
  -8  -1   1    1.90    0.34
  -8  -1   0   34.59    1.46
  -8  -1   0   34.64    1.40
  -8  -1   0   35.00    1.44
  -8  -1  -1    2.72    0.51
  -8  -1  -1    2.36    0.39
  -8  -1  -2    0.90    0.29
  -8  -1  -2    0.66    0.24
  -8  -1  -3   18.33    0.87
  -8  -1  -3   15.89    0.73
  -8  -1  -4    1.70    0.26
  -8  -2  12    4.32    0.35
  -8  -2  11   20.26    0.68
  -8  -2  11   22.22    0.89
  -8  -2  11   20.70    0.82
  -8  -2  10   13.04    0.77
  -8  -2  10   11.36    0.71
  -8  -2   9   28.46    1.22
  -8  -2   9   25.93    1.15
  -8  -2   8   11.36    0.87
  -8  -2   8   12.39    0.86
  -8  -2   7   23.81    1.21
  -8  -2   6    0.03    0.24
  -8  -2   5   18.00    1.10
  -8  -2   4   22.44    1.20
   8   2  -3   20.83    0.94
  -8  -2   3   21.39    1.18
   8   2  -2    0.22    0.17
  -8  -2   2    0.12    0.28
  -8  -2   2    0.24    0.14
  -8  -2   1    7.93    0.72
  -8  -2   0    1.29    0.40
  -8  -2  -1    9.53    0.76
  -8  -2  -2   28.91    1.17
  -8  -2  -3    5.07    0.47
  -8  -2  -4    5.86    0.38
  -8  -3  12    1.24    0.17
  -8  -3  11   28.48    0.79
  -8  -3  11   30.29    0.95
  -8  -3  10    1.65    0.34
  -8  -3  10    1.60    0.24
  -8  -3   9   20.17    1.01
  -8  -3   9   19.31    0.87
   8   3  -8   44.32    1.23
  -8  -3   8   44.50    1.54
  -8  -3   8   42.66    1.40
   8   3  -7    2.98    0.40
  -8  -3   7    3.13    0.45
   8   3  -6   16.62    0.84
  -8  -3   6   17.59    1.01
   8   3  -5    0.62    0.26
  -8  -3   5    0.74    0.33
   8   3  -4   22.71    1.01
  -8  -3   4   21.77    1.17
   8   3  -3   24.18    1.05
  -8  -3   3   23.64    1.19
   8   3  -2    0.35    0.12
  -8  -3   2    0.41    0.29
   8   3  -1    0.61    0.24
  -8  -3   1    0.78    0.32
  -8  -3   0    0.59    0.31
  -8  -3  -1    0.95    0.28
  -8  -3  -2    5.56    0.49
   8   3   3    0.45    0.13
  -8  -3  -3    0.56    0.18
  -8  -4  11    8.49    0.40
  -8  -4  11    8.71    0.43
  -8  -4  10    3.32    0.36
  -8  -4   9    0.13    0.19
   8   4  -8   34.35    1.08
  -8  -4   8   34.65    1.30
   8   4  -7    1.55    0.28
   8   4  -6   13.19    0.74
   8   4  -5    1.28    0.29
  -8  -4   5    0.97    0.26
   8   4  -4    2.75    0.37
  -8  -4   4    2.88    0.43
   8   4  -3   27.42    1.12
  -8  -4   3   26.35    1.17
   8   4  -2    0.12    0.23
  -8  -4   2    0.34    0.24
   8   4  -1   25.76    1.04
  -8  -4   1   26.39    1.13
   8   4   0    6.30    0.50
  -8  -4   0    6.87    0.57
   8   4   1    3.45    0.36
  -8  -4  -1    3.69    0.40
   8   4   2    0.34    0.15
  -8  -4  -2    0.63    0.17
  -8  -5  10    6.82    0.39
  -8  -5   9    7.19    0.49
   8   5  -8    2.46    0.32
  -8  -5   8    2.84    0.36
   8   5  -7   11.00    0.65
   8   5  -6    0.79    0.28
   8   5  -5   13.33    0.74
   8   5  -4   25.11    1.01
  -8  -5   4   23.43    0.92
   8   5  -3   11.23    0.69
  -8  -5   3   10.74    0.64
   8   5  -2    7.11    0.54
  -8  -5   2    7.29    0.54
   8   5  -1    1.26    0.29
  -8  -5   1    1.67    0.25
   8   5   0   15.07    0.68
  -8  -5   0   15.34    0.66
   8   5   1    2.04    0.24
  -8  -5  -1    1.65    0.20
  -8  -6   9    0.54    0.09
  -8  -6   8    2.58    0.26
   8   6  -7   16.54    0.67
  -8  -6   7   15.32    0.69
   8   6  -6    1.19    0.24
   8   6  -5   30.73    1.00
   8   6  -4   38.42    1.11
   8   6  -3    6.71    0.48
   8   6  -2    7.63    0.50
   8   6  -1    0.06    0.11
   8   6   0    8.13    0.40
   8   7  -6    0.18    0.12
  -8  -7   6    0.49    0.09
   8   7  -5    1.63    0.22
   8   7  -4    5.27    0.35
   8   7  -3    0.38    0.14
   8   7  -2    1.89    0.20
  -9   8   7    1.07    0.17
  -9   8   6    2.55    0.26
  -9   8   5    4.50    0.28
  -9   8   5    4.58    0.32
  -9   8   4    0.84    0.17
  -9   8   4    0.58    0.13
  -9   8   3   11.47    0.51
  -9   8   3   13.51    0.58
  -9   8   2    1.45    0.21
  -9   8   2    1.54    0.22
  -9   8   1    5.91    0.34
  -9   7   8    0.29    0.13
  -9   7   7    7.75    0.51
  -9   7   6    0.52    0.14
  -9   7   6    0.66    0.24
  -9   7   6    0.84    0.23
  -9   7   5    1.08    0.21
  -9   7   5    1.11    0.26
  -9   7   5    1.40    0.25
  -9   7   4    3.67    0.38
  -9   7   4    3.62    0.38
  -9   7   4    4.47    0.45
  -9   7   3    4.14    0.39
  -9   7   3    3.53    0.35
  -9   7   2   13.36    0.67
  -9   7   2   14.76    0.73
  -9   7   1   -0.01    0.13
  -9   7   1    0.16    0.15
  -9   7   0    7.89    0.47
  -9   7   0    8.04    0.42
  -9   7  -1    0.03    0.07
  -9   6   9    0.57    0.16
  -9   6   9    0.12    0.09
  -9   6   8   -0.02    0.18
  -9   6   8    0.16    0.14
  -9   6   7    4.11    0.44
  -9   6   7    3.70    0.35
  -9   6   6    0.18    0.21
  -9   6   6    0.23    0.16
  -9   6   5    2.09    0.28
  -9   6   5    2.98    0.43
  -9   6   5    2.94    0.40
  -9   6   4   10.29    0.61
  -9   6   4   11.48    0.77
  -9   6   4   11.87    0.74
  -9   6   3    0.12    0.16
  -9   6   3    0.23    0.19
  -9   6   3    0.27    0.20
  -9   6   2   -0.05    0.16
  -9   6   2    0.20    0.16
  -9   6   2    0.04    0.23
  -9   6   1    5.87    0.53
  -9   6   1    7.08    0.57
  -9   6   0    0.59    0.19
  -9   6   0   -0.02    0.14
  -9   6  -1    3.45    0.33
  -9   6  -1    3.42    0.32
  -9   6  -2    0.28    0.09
  -9   5  10    4.50    0.27
  -9   5  10    6.21    0.40
  -9   5   9   11.67    0.59
  -9   5   8    4.17    0.44
  -9   5   7    9.24    0.70
  -9   5   7    8.91    0.57
  -9   5   6    9.91    0.78
  -9   5   6   10.58    0.67
  -9   5   5   13.49    0.91
  -9   5   5   12.47    0.77
  -9   5   4    9.93    0.65
  -9   5   4   12.89    0.89
  -9   5   4   11.68    0.79
  -9   5   3   -0.09    0.14
  -9   5   3   -0.25    0.27
  -9   5   3   -0.12    0.26
  -9   5   2    2.08    0.36
  -9   5   2    2.15    0.38
  -9   5   2    2.24    0.42
  -9   5   1    4.02    0.45
  -9   5   1    3.69    0.40
  -9   5   1    4.15    0.52
  -9   5   0    0.29    0.24
  -9   5  -1   15.53    0.73
  -9   5  -2    1.56    0.23
  -9   5  -2    1.52    0.22
  -9   4  11    3.06    0.29
  -9   4  11    1.76    0.18
  -9   4  10    0.15    0.16
  -9   4   9   20.23    0.83
  -9   4   9   21.81    0.91
  -9   4   8   14.55    0.83
  -9   4   8   15.67    0.83
  -9   4   7   14.17    0.90
  -9   4   7   13.55    0.69
  -9   4   7   15.26    0.85
  -9   4   6   12.47    0.89
  -9   4   6   11.70    0.70
  -9   4   6   12.79    0.82
  -9   4   5    9.49    0.81
  -9   4   5    8.31    0.65
  -9   4   5    8.99    0.70
  -9   4   4   26.14    1.31
  -9   4   4   24.22    1.13
  -9   4   3   18.50    1.09
  -9   4   3   17.02    0.98
  -9   4   2    2.52    0.43
  -9   4   2    2.20    0.43
  -9   4   1   38.58    1.31
  -9   4   1   40.60    1.45
  -9   4   0    1.27    0.34
  -9   4  -1   17.12    0.84
  -9   4  -1   15.68    0.78
  -9   4  -2    0.93    0.22
  -9   3  11    2.16    0.27
  -9   3  10    0.80    0.24
  -9   3   9    7.60    0.53
  -9   3   9    8.19    0.63
  -9   3   8    1.59    0.35
  -9   3   8    1.08    0.30
  -9   3   7    0.72    0.29
  -9   3   7    0.69    0.27
  -9   3   6    4.86    0.62
  -9   3   6    4.26    0.43
  -9   3   6    5.27    0.59
  -9   3   5    0.20    0.24
  -9   3   5   -0.19    0.20
  -9   3   4    1.60    0.38
  -9   3   4    1.34    0.35
  -9   3   4    2.24    0.39
  -9   3   3    2.06    0.41
  -9   3   3    2.38    0.46
  -9   3   2    3.13    0.43
  -9   3   2    3.05    0.49
  -9   3   1    9.64    0.79
  -9   3   0    0.83    0.25
  -9   3   0    0.41    0.28
  -9   3   0    1.12    0.32
  -9   3  -1    7.55    0.62
  -9   3  -1    8.40    0.63
  -9   3  -2    0.86    0.25
  -9   3  -2    1.08    0.24
  -9   3  -3    0.41    0.14
  -9   2  12    3.06    0.24
  -9   2  11   16.26    0.75
  -9   2  10   10.46    0.70
  -9   2   9    7.03    0.49
  -9   2   9    8.84    0.71
  -9   2   8    3.08    0.42
  -9   2   8    4.47    0.56
  -9   2   7   17.14    1.00
  -9   2   7   19.04    1.08
  -9   2   6   21.80    1.19
  -9   2   6   20.60    1.03
  -9   2   5   19.15    1.05
  -9   2   5   18.45    1.02
  -9   2   4    0.08    0.29
  -9   2   4    0.61    0.22
  -9   2   4    0.48    0.28
  -9   2   3   22.91    1.10
  -9   2   3   20.17    1.02
  -9   2   3   21.61    1.04
  -9   2   2    0.76    0.35
  -9   2   2    0.42    0.34
  -9   2   1   20.85    0.99
  -9   2   1   22.16    1.11
  -9   2   0   11.73    0.70
  -9   2   0   11.74    0.80
  -9   2   0   12.62    0.84
  -9   2  -1    1.27    0.22
  -9   2  -1    0.99    0.31
  -9   2  -1    1.49    0.32
  -9   2  -2    4.89    0.46
  -9   2  -2    4.90    0.46
  -9   2  -3    2.76    0.29
  -9   1  12    7.13    0.34
  -9   1  12    9.40    0.47
  -9   1  11    0.22    0.08
  -9   1  11    0.62    0.22
  -9   1  10    6.12    0.44
  -9   1  10    7.24    0.62
  -9   1   9    4.63    0.40
  -9   1   9    4.72    0.56
  -9   1   8    0.20    0.26
  -9   1   8   -0.05    0.13
  -9   1   7   15.74    0.93
  -9   1   7   17.34    1.06
  -9   1   6    8.56    0.77
  -9   1   6    8.22    0.70
  -9   1   5   11.86    0.87
  -9   1   5   11.32    0.81
  -9   1   4   14.04    0.93
  -9   1   4   14.53    0.90
  -9   1   3    0.21    0.27
  -9   1   3    0.05    0.20
  -9   1   3   -0.26    0.22
  -9   1   2   20.26    1.07
  -9   1   2   19.08    0.98
  -9   1   1    1.16    0.34
  -9   1   0   21.79    1.00
  -9   1   0   22.43    1.10
  -9   1  -1    0.30    0.18
  -9   1  -1    0.15    0.18
  -9   1  -2    0.22    0.15
  -9   1  -3    1.02    0.19
  -9   0  12    2.54    0.26
  -9   0  11    0.30    0.17
  -9   0  11    0.41    0.19
  -9   0  10    1.00    0.26
  -9   0  10    0.88    0.24
  -9   0   9    4.60    0.45
  -9   0   9    5.11    0.56
  -9   0   8    2.85    0.36
  -9   0   8    3.41    0.44
  -9   0   8    3.02    0.48
  -9   0   7   10.50    0.72
  -9   0   7   11.35    0.85
  -9   0   6    0.58    0.35
  -9   0   6    0.69    0.24
  -9   0   5    0.23    0.31
  -9   0   5    0.64    0.29
  -9   0   4   12.60    0.90
  -9   0   4   12.48    0.83
  -9   0   3   28.02    1.30
  -9   0   2    3.70    0.53
  -9   0   2    3.45    0.43
  -9   0   1    2.42    0.44
  -9   0   0    0.69    0.27
  -9   0  -1   12.67    0.73
  -9   0  -2    1.62    0.28
  -9   0  -3    2.74    0.25
  -9  -1  11   12.83    0.57
  -9  -1  11   13.00    0.61
  -9  -1  10    0.23    0.16
  -9  -1  10    0.44    0.19
  -9  -1   9   24.87    1.01
  -9  -1   9   25.57    1.11
  -9  -1   8   12.68    0.78
  -9  -1   8   12.68    0.83
  -9  -1   7    7.56    0.61
  -9  -1   7    7.35    0.67
  -9  -1   6    0.28    0.23
  -9  -1   5    1.33    0.35
  -9  -1   4    7.78    0.71
  -9  -1   3    3.15    0.48
  -9  -1   2    8.64    0.73
  -9  -1   1    2.59    0.45
  -9  -1   0    0.17    0.23
  -9  -1  -1   23.50    0.96
  -9  -1  -2   11.24    0.57
  -9  -2  11    9.19    0.45
  -9  -2  10    3.17    0.38
  -9  -2  10    3.22    0.35
  -9  -2   9   27.78    1.04
  -9  -2   9   26.29    1.01
  -9  -2   8   16.72    0.87
  -9  -2   8   16.37    0.88
  -9  -2   7    5.38    0.55
  -9  -2   6   15.39    0.93
  -9  -2   5    1.72    0.40
  -9  -2   4    8.03    0.69
  -9  -2   3   31.68    1.33
  -9  -2   2    3.93    0.51
  -9  -2   1    2.47    0.41
  -9  -2   0    1.51    0.31
  -9  -2  -1    0.19    0.16
  -9  -2  -2    0.01    0.11
  -9  -3  11    2.95    0.24
  -9  -3  10    3.42    0.34
  -9  -3   9    4.38    0.43
  -9  -3   9    3.47    0.33
  -9  -3   8   21.84    0.94
  -9  -3   8   21.42    0.84
  -9  -3   7    3.04    0.38
  -9  -3   6   28.87    1.10
  -9  -3   5   23.36    1.06
   9   3  -4    3.04    0.33
  -9  -3   4    2.97    0.43
   9   3  -3   30.93    0.95
  -9  -3   3   32.34    1.23
   9   3  -2    3.04    0.33
  -9  -3   2    2.96    0.42
   9   3  -1    6.85    0.44
  -9  -3   1    7.42    0.56
   9   3   0    5.36    0.32
  -9  -3   0    7.24    0.52
  -9  -3  -1    0.61    0.15
  -9  -4  10    9.80    0.42
  -9  -4   9    0.37    0.17
  -9  -4   8    8.86    0.57
   9   4  -7   10.66    0.49
  -9  -4   7   12.55    0.71
   9   4  -6    8.28    0.48
   9   4  -5   20.74    0.75
   9   4  -4    0.28    0.16
  -9  -4   4    0.15    0.18
   9   4  -3   14.23    0.63
  -9  -4   3   14.36    0.72
   9   4  -2    1.41    0.19
  -9  -4   2    1.45    0.25
   9   4  -1    2.62    0.25
  -9  -4   1    3.49    0.35
  -9  -4   0   18.96    0.61
  -9  -5   8    5.75    0.37
  -9  -5   7    0.69    0.18
   9   5  -6    5.18    0.34
   9   5  -5    0.89    0.16
   9   5  -4    2.06    0.25
   9   5  -3    1.02    0.19
   9   5  -2    6.43    0.33
  -9  -6   5    1.24    0.15
 -10   7   6   -0.08    0.08
 -10   7   5    5.21    0.31
 -10   7   4    0.34    0.11
 -10   7   3    0.94    0.15
 -10   6   8    0.76    0.14
 -10   6   7    3.34    0.30
 -10   6   6    0.06    0.12
 -10   6   6    0.34    0.11
 -10   6   5    3.52    0.35
 -10   6   5    3.33    0.31
 -10   6   4    0.61    0.18
 -10   6   4    0.74    0.17
 -10   6   3    0.05    0.06
 -10   6   3    0.47    0.13
 -10   6   3    0.58    0.18
 -10   6   2    1.54    0.18
 -10   6   2    2.34    0.26
 -10   6   1    0.01    0.07
 -10   5   9    6.62    0.32
 -10   5   8    1.30    0.23
 -10   5   7    0.04    0.19
 -10   5   6    8.32    0.58
 -10   5   6    7.57    0.44
 -10   5   5    1.82    0.33
 -10   5   5    1.81    0.26
 -10   5   4    2.91    0.39
 -10   5   4    2.90    0.35
 -10   5   3    1.34    0.20
 -10   5   3    1.78    0.29
 -10   5   3    2.00    0.32
 -10   5   2    0.91    0.16
 -10   5   2    0.93    0.20
 -10   5   1    7.02    0.37
 -10   5   1    9.87    0.51
 -10   5   0    0.30    0.12
 -10   4  10    0.20    0.10
 -10   4   9    1.01    0.18
 -10   4   9    0.98    0.18
 -10   4   8    6.33    0.47
 -10   4   8    5.69    0.41
 -10   4   7    4.26    0.44
 -10   4   7    4.32    0.39
 -10   4   6   10.36    0.53
 -10   4   6   11.54    0.63
 -10   4   5    0.35    0.19
 -10   4   5    0.43    0.22
 -10   4   5    0.13    0.16
 -10   4   4    0.59    0.17
 -10   4   4    0.27    0.22
 -10   4   4    0.12    0.17
 -10   4   3   13.23    0.73
 -10   4   3   12.51    0.69
 -10   4   2    1.06    0.20
 -10   4   2    0.84    0.22
 -10   4   2    1.01    0.26
 -10   4   1    4.08    0.33
 -10   4   1    6.67    0.47
 -10   4   0    0.14    0.10
 -10   4   0    0.63    0.16
 -10   3  10    0.92    0.19
 -10   3   9    1.59    0.23
 -10   3   9    2.37    0.31
 -10   3   8   10.31    0.60
 -10   3   8   12.77    0.69
 -10   3   7    0.38    0.23
 -10   3   7    0.63    0.23
 -10   3   6   13.93    0.83
 -10   3   6   14.20    0.80
 -10   3   5    2.11    0.40
 -10   3   5    2.17    0.28
 -10   3   5    2.44    0.38
 -10   3   4    0.62    0.32
 -10   3   4    0.65    0.20
 -10   3   3   21.40    1.00
 -10   3   3   19.09    0.85
 -10   3   2   -0.14    0.16
 -10   3   2    0.35    0.18
 -10   3   1   32.55    0.93
 -10   3   1   34.41    1.07
 -10   3   0    0.05    0.09
 -10   3   0    0.06    0.13
 -10   3  -1    3.34    0.27
 -10   2  10   11.97    0.59
 -10   2   9    7.85    0.41
 -10   2   9   10.91    0.64
 -10   2   8    1.47    0.27
 -10   2   8    2.13    0.36
 -10   2   7    9.76    0.65
 -10   2   7   10.95    0.74
 -10   2   6    0.50    0.33
 -10   2   6    0.72    0.26
 -10   2   5    7.03    0.63
 -10   2   4    5.91    0.52
 -10   2   4    5.47    0.44
 -10   2   3    2.93    0.39
 -10   2   3    2.99    0.36
 -10   2   2    6.14    0.46
 -10   2   2    5.54    0.46
 -10   2   1    8.08    0.47
 -10   2   1    8.39    0.52
 -10   2   1    8.30    0.53
 -10   2   0    2.80    0.31
 -10   2  -1    4.09    0.30
 -10   1  11    0.66    0.14
 -10   1  10    2.93    0.32
 -10   1   9   17.17    0.81
 -10   1   8    0.18    0.17
 -10   1   8    0.19    0.18
 -10   1   7    7.58    0.58
 -10   1   7    8.89    0.69
 -10   1   6    0.23    0.24
 -10   1   6    0.19    0.25
 -10   1   5   12.51    0.78
 -10   1   4   11.35    0.74
 -10   1   3    2.90    0.40
 -10   1   3    2.26    0.32
 -10   1   2    0.21    0.19
 -10   1   2    0.56    0.18
 -10   1   1    0.98    0.21
 -10   1   1    0.90    0.22
 -10   1   0   -0.03    0.12
 -10   1   0    0.10    0.10
 -10   1   0   -0.09    0.11
 -10   1  -1    9.86    0.41
 -10   0  10    1.54    0.25
 -10   0   9   35.73    1.13
 -10   0   8   -0.02    0.20
 -10   0   8    0.23    0.09
 -10   0   7    4.52    0.45
 -10   0   7    5.70    0.54
 -10   0   6   -0.07    0.18
 -10   0   5    2.84    0.42
 -10   0   4    3.21    0.45
 -10   0   3    6.57    0.57
 -10   0   2    0.12    0.16
 -10   0   1    0.61    0.20
 -10   0   1    0.18    0.08
 -10   0   0    0.51    0.17
 -10   0   0    0.27    0.07
 -10  -1  10    2.40    0.24
 -10  -1   9   13.16    0.52
 -10  -1   9   15.02    0.68
 -10  -1   8    5.68    0.41
 -10  -1   8    6.91    0.52
 -10  -1   7    1.14    0.28
 -10  -1   7    0.85    0.20
 -10  -1   7    0.98    0.21
 -10  -1   6    3.09    0.34
 -10  -1   6    3.78    0.44
 -10  -1   5    0.33    0.23
 -10  -1   4   13.03    0.77
 -10  -1   3   20.35    0.91
 -10  -1   2    1.38    0.29
 -10  -1   1    8.82    0.53
 -10  -1   0    5.60    0.37
 -10  -2   9    2.21    0.24
 -10  -2   9    1.90    0.24
 -10  -2   8    6.64    0.42
 -10  -2   8    7.69    0.48
 -10  -2   7    0.37    0.17
 -10  -2   7    0.45    0.17
 -10  -2   6   10.44    0.56
 -10  -2   6   11.38    0.63
 -10  -2   5   11.18    0.68
 -10  -2   4    7.94    0.57
 -10  -2   3   15.19    0.73
 -10  -2   2    0.66    0.20
 -10  -2   1   14.90    0.60
 -10  -3   8   11.23    0.48
 -10  -3   7    3.27    0.32
 -10  -3   6    1.03    0.20
 -10  -3   6    1.92    0.26
 -10  -3   5   19.64    0.68
 -10  -3   4    1.06    0.18
 -10  -3   4    1.44    0.21
 -10  -3   3    6.08    0.40
 -10  -3   2    0.27    0.12
 -10  -4   7    0.67    0.14
 -10  -4   6    0.79    0.17
 -10  -4   5    8.74    0.40
 -11   4   7    0.31    0.10
 -11   4   6    3.72    0.30
 -11   4   5    1.53    0.23
 -11   4   4    0.20    0.09
 -11   3   7    4.97    0.34
 -11   3   7    4.51    0.31
 -11   3   6    4.43    0.36
 -11   3   6    4.23    0.33
 -11   3   5   11.04    0.56
 -11   3   5   10.92    0.48
 -11   3   4    7.22    0.43
 -11   3   3    0.49    0.13
 -11   2   8    3.09    0.27
 -11   2   7    0.11    0.15
 -11   2   7   -0.07    0.14
 -11   2   6    0.28    0.13
 -11   2   6    0.05    0.14
 -11   2   5    2.58    0.30
 -11   2   5    2.33    0.29
 -11   2   4    9.85    0.53
 -11   2   4    9.71    0.50
 -11   2   3   -0.04    0.08
 -11   2   3    0.22    0.14
 -11   1   8    0.22    0.12
 -11   1   7    1.24    0.23
 -11   1   7    0.91    0.16
 -11   1   6    1.45    0.24
 -11   1   6    1.84    0.29
 -11   1   5    0.58    0.16
 -11   1   5    0.63    0.19
 -11   1   4   10.39    0.54
 -11   1   4   10.64    0.54
 -11   1   3   -0.24    0.14
 -11   0   8    2.41    0.24
 -11   0   7    2.94    0.29
 -11   0   6    7.55    0.42
 -11   0   6    9.02    0.50
 -11   0   5   -0.02    0.08
 -11   0   5   -0.04    0.11
 -11   0   4    8.43    0.46
 -11   0   4    8.49    0.47
 -11   0   3    0.51    0.14
 -11  -1   7   -0.16    0.10
 -11  -1   6    2.29    0.25
 -11  -1   5    4.04    0.29
 -11  -1   5    4.98    0.34
 -11  -1   4    3.36    0.26
 -11  -1   4    2.97    0.25
   0   0   0    0.00    0.00
;
_shelx_hkl_checksum   27291
#================================================================end

data_L-2
 
_audit_creation_method            SHELXL-2013
_chemical_name_systematic
;
 ?
;
_chemical_name_common             ?
_chemical_melting_point           ?
_chemical_formula_moiety          'C19 H24 Cu2 N6 O6 '
_chemical_formula_sum
 'C19 H24 Cu2 N6 O6' 
_chemical_formula_weight          559.52

loop_
 _atom_type_symbol
 _atom_type_description
 _atom_type_scat_dispersion_real
 _atom_type_scat_dispersion_imag
 _atom_type_scat_source
 'C'  'C'   0.0033   0.0016
 'International Tables Vol C Tables 4.2.6.8 and 6.1.1.4'
 'H'  'H'   0.0000   0.0000
 'International Tables Vol C Tables 4.2.6.8 and 6.1.1.4'
 'N'  'N'   0.0061   0.0033
 'International Tables Vol C Tables 4.2.6.8 and 6.1.1.4'
 'O'  'O'   0.0106   0.0060
 'International Tables Vol C Tables 4.2.6.8 and 6.1.1.4'
 'Cu'  'Cu'   0.3201   1.2651
 'International Tables Vol C Tables 4.2.6.8 and 6.1.1.4'
 
_space_group_crystal_system       tetragonal
_space_group_IT_number            92
_space_group_name_H-M_alt         'P 41 21 2'
_space_group_name_Hall            'P 4abw 2nw'
 
_shelx_space_group_comment
;
The symmetry employed for this shelxl refinement is uniquely defined
by the following loop, which should always be used as a source of
symmetry information in preference to the above space-group names.
They are only intended as comments.
;
 
loop_
 _space_group_symop_operation_xyz
 'x, y, z'
 '-x, -y, z+1/2'
 '-y+1/2, x+1/2, z+1/4'
 'y+1/2, -x+1/2, z+3/4'
 '-x+1/2, y+1/2, -z+1/4'
 'x+1/2, -y+1/2, -z+3/4'
 'y, x, -z'
 '-y, -x, -z+1/2'
 
_cell_length_a                    13.533(2)
_cell_length_b                    13.533(2)
_cell_length_c                    14.972(4)
_cell_angle_alpha                 90
_cell_angle_beta                  90
_cell_angle_gamma                 90
_cell_volume                      2742.1(11)
_cell_formula_units_Z             4
_cell_measurement_temperature     293(2)
_cell_measurement_reflns_used     8775   
_cell_measurement_theta_min       2.0285 
_cell_measurement_theta_max       33.4158
 
_exptl_crystal_description        'block' 
_exptl_crystal_colour             'blue' 
_exptl_crystal_density_meas       ?
_exptl_crystal_density_method     ?              
_exptl_crystal_density_diffrn     1.355          
_exptl_crystal_F_000              1144
_exptl_transmission_factor_min    ?                                             
_exptl_transmission_factor_max    ?                                             
_exptl_crystal_size_max           0.200
_exptl_crystal_size_mid           0.200
_exptl_crystal_size_min           0.100
_exptl_absorpt_coefficient_mu     1.591
_shelx_estimated_absorpt_T_min    0.741
_shelx_estimated_absorpt_T_max    0.857
_exptl_absorpt_correction_type    multi-scan 
_exptl_absorpt_correction_T_min   0.735 
_exptl_absorpt_correction_T_max   0.853 
_exptl_absorpt_process_details    ? 
 
_exptl_special_details
;
 ?
;
 
_diffrn_ambient_temperature       293(2)
_diffrn_radiation_wavelength      0.71073
_diffrn_radiation_type            MoK\a
_diffrn_source                    ?                    
_diffrn_measurement_device_type   ?
_diffrn_measurement_method        'CCD_Profile_fitting' 
_diffrn_detector_area_resol_mean  ? 
_diffrn_reflns_number             29686
_diffrn_reflns_av_unetI/netI      0.0326
_diffrn_reflns_av_R_equivalents   0.0463
_diffrn_reflns_limit_h_min        -20
_diffrn_reflns_limit_h_max        20
_diffrn_reflns_limit_k_min        -19
_diffrn_reflns_limit_k_max        20
_diffrn_reflns_limit_l_min        -23
_diffrn_reflns_limit_l_max        22
_diffrn_reflns_theta_min          2.028
_diffrn_reflns_theta_max          33.536
_diffrn_reflns_theta_full         25.242
_diffrn_measured_fraction_theta_max   0.965
_diffrn_measured_fraction_theta_full  0.996
_diffrn_reflns_Laue_measured_fraction_max    0.965
_diffrn_reflns_Laue_measured_fraction_full   0.996
_diffrn_reflns_point_group_measured_fraction_max   0.957
_diffrn_reflns_point_group_measured_fraction_full  0.997
_reflns_number_total              5155
_reflns_number_gt                 4608
_reflns_threshold_expression      'I > 2\s(I)'
_reflns_Friedel_coverage          0.726
_reflns_Friedel_fraction_max      0.945
_reflns_Friedel_fraction_full     0.999
 
_reflns_special_details
;
 Reflections were merged by SHELXL according to the crystal
 class for the calculation of statistics and refinement.
 
 _reflns_Friedel_fraction is defined as the number of unique
 Friedel pairs measured divided by the number that would be
 possible theoretically, ignoring centric projections and
 systematic absences.
;
 
_computing_data_collection        'CrystalClear (Rigaku Inc., 2008)'
_computing_cell_refinement        'CrystalClear (Rigaku Inc., 2008)'
_computing_data_reduction         'CrystalClear (Rigaku Inc., 2008)'
_computing_structure_solution     'SHELXL-2013 (Sheldrick, 2013)'
_computing_structure_refinement   'SHELXL-2013 (Sheldrick, 2013)'
_computing_molecular_graphics     'DIAMOND'
_computing_publication_material   'SHELXL-2013 (Sheldrick, 2013)'
 
_refine_special_details
;
 ?
;
_refine_ls_structure_factor_coef  Fsqd
_refine_ls_matrix_type            full
_refine_ls_weighting_scheme       calc
_refine_ls_weighting_details
;
 w=1/[\s^2^(Fo^2^)+(0.1540P)^2^]
 where P=(Fo^2^+2Fc^2^)/3
;
_atom_sites_solution_primary      direct
_atom_sites_solution_secondary    difmap
_atom_sites_solution_hydrogens    geom  
_refine_ls_hydrogen_treatment     mixed
_refine_ls_extinction_method      SHELXL
_refine_ls_extinction_coef        0.075(7)
_refine_ls_extinction_expression
 'Fc^*^=kFc[1+0.001xFc^2^\l^3^/sin(2\q)]^-1/4^'
_refine_ls_abs_structure_details
;
 Flack x determined using 1591 quotients [(I+)-(I-)]/[(I+)+(I-)]
 (Parsons and Flack (2004), Acta Cryst. A60, s61).
;
_refine_ls_abs_structure_Flack    0.014(6)
_chemical_absolute_configuration  ad
_refine_ls_number_reflns          5155
_refine_ls_number_parameters      155
_refine_ls_number_restraints      0
_refine_ls_R_factor_all           0.0781
_refine_ls_R_factor_gt            0.0640
_refine_ls_wR_factor_ref          0.2008
_refine_ls_wR_factor_gt           0.1847
_refine_ls_goodness_of_fit_ref    0.997
_refine_ls_restrained_S_all       0.997
_refine_ls_shift/su_max           0.000
_refine_ls_shift/su_mean          0.000
 
loop_
 _atom_site_label
 _atom_site_type_symbol
 _atom_site_fract_x
 _atom_site_fract_y
 _atom_site_fract_z
 _atom_site_U_iso_or_equiv
 _atom_site_adp_type
 _atom_site_occupancy
 _atom_site_site_symmetry_order  
 _atom_site_calc_flag
 _atom_site_refinement_flags_posn
 _atom_site_refinement_flags_adp
 _atom_site_refinement_flags_occupancy
 _atom_site_disorder_assembly
 _atom_site_disorder_group
Cu1 Cu 0.47309(4) 0.20446(4) 0.03528(3) 0.0374(2) Uani 1 1 d . . . . .
O1 O 0.3830(3) 0.2954(3) 0.1040(2) 0.0476(8) Uani 1 1 d . . . . .
O3 O 0.3816(3) 0.0651(3) 0.0440(2) 0.0504(9) Uani 1 1 d . . . . .
O2 O 0.5537(3) 0.1396(3) -0.0592(2) 0.0406(7) Uani 1 1 d . . . . .
N3 N 0.4155(3) 0.2679(3) -0.0671(2) 0.0397(7) Uani 1 1 d . . . . .
C2 C 0.4519(4) 0.2404(4) -0.1547(3) 0.0427(9) Uani 1 1 d . . . . .
H2A H 0.3973 0.2136 -0.1901 0.051 Uiso 1 1 calc R U . . .
C6 C 0.7052(4) 0.1725(3) 0.2175(3) 0.0410(8) Uani 1 1 d . . . . .
N2 N 0.5519(3) 0.1230(4) 0.2043(3) 0.0466(9) Uani 1 1 d . . . . .
H2B H 0.4961 0.0953 0.2158 0.056 Uiso 1 1 calc R U . . .
C4 C 0.5295(4) 0.1588(3) -0.1394(3) 0.0381(8) Uani 1 1 d . . . . .
C1 C 0.3472(4) 0.3322(3) -0.0504(3) 0.0380(8) Uani 1 1 d . . . . .
C7 C 0.6326(5) 0.1155(4) 0.2567(4) 0.0517(12) Uani 1 1 d . . . . .
C5 C 0.6623(4) 0.2097(4) 0.1385(3) 0.0439(9) Uani 1 1 d . . . . .
N1 N 0.5694(3) 0.1790(3) 0.1315(3) 0.0400(8) Uani 1 1 d . . . . .
C10 C 0.8093(4) 0.1907(4) 0.2500 0.0507(16) Uani 1 2 d S T P . .
C9 C 0.6308(8) 0.0535(8) 0.3398(6) 0.095(4) Uani 1 1 d . . . . .
H9A H 0.5667 0.0239 0.3465 0.143 Uiso 1 1 calc R U . . .
H9B H 0.6445 0.0943 0.3908 0.143 Uiso 1 1 calc R U . . .
H9C H 0.6799 0.0025 0.3355 0.143 Uiso 1 1 calc R U . . .
C8 C 0.7088(7) 0.2735(9) 0.0680(5) 0.095(4) Uani 1 1 d . . . . .
H8A H 0.6613 0.2869 0.0219 0.142 Uiso 1 1 calc R U . . .
H8B H 0.7646 0.2398 0.0428 0.142 Uiso 1 1 calc R U . . .
H8C H 0.7301 0.3345 0.0943 0.142 Uiso 1 1 calc R U . . .
C3 C 0.4973(9) 0.3283(6) -0.2041(5) 0.091(3) Uani 1 1 d . . . . .
H3A H 0.4478 0.3782 -0.2128 0.136 Uiso 1 1 calc R U . . .
H3B H 0.5217 0.3068 -0.2610 0.136 Uiso 1 1 calc R U . . .
H3C H 0.5507 0.3550 -0.1695 0.136 Uiso 1 1 calc R U . . .
H10A H 0.822(6) 0.157(6) 0.298(4) 0.051(18) Uiso 1 1 d . . . . .
 
loop_
 _atom_site_aniso_label
 _atom_site_aniso_U_11
 _atom_site_aniso_U_22
 _atom_site_aniso_U_33
 _atom_site_aniso_U_23
 _atom_site_aniso_U_13
 _atom_site_aniso_U_12
Cu1 0.0409(3) 0.0396(3) 0.0317(3) 0.00083(18) -0.00006(18) 0.00711(18)
O1 0.0531(19) 0.058(2) 0.0316(12) 0.0013(14) -0.0006(13) 0.0203(16)
O3 0.059(2) 0.055(2) 0.0375(15) 0.0046(15) 0.0077(15) -0.0168(17)
O2 0.0428(16) 0.0416(17) 0.0375(14) -0.0002(12) 0.0028(11) 0.0101(12)
N3 0.048(2) 0.0399(18) 0.0308(13) 0.0026(13) 0.0033(14) 0.0103(14)
C2 0.052(3) 0.044(2) 0.0316(16) -0.0013(15) 0.0030(15) 0.0098(18)
C6 0.043(2) 0.0389(19) 0.0414(18) -0.0015(16) -0.0045(16) -0.0042(16)
N2 0.042(2) 0.062(3) 0.0356(16) 0.0070(17) -0.0057(14) -0.0146(18)
C4 0.0388(19) 0.0371(19) 0.0385(17) -0.0024(14) 0.0048(15) 0.0036(15)
C1 0.044(2) 0.040(2) 0.0297(15) -0.0022(13) 0.0023(14) 0.0084(15)
C7 0.059(3) 0.049(3) 0.047(2) 0.008(2) -0.014(2) -0.018(2)
C5 0.044(2) 0.047(2) 0.041(2) 0.0018(18) -0.0007(17) -0.0089(18)
N1 0.0412(18) 0.045(2) 0.0340(15) 0.0019(14) -0.0034(14) -0.0012(15)
C10 0.043(2) 0.043(2) 0.067(5) -0.009(2) -0.009(2) 0.001(3)
C9 0.106(7) 0.101(6) 0.078(5) 0.049(5) -0.053(5) -0.062(5)
C8 0.083(5) 0.141(9) 0.060(4) 0.033(5) -0.016(4) -0.061(6)
C3 0.142(8) 0.062(4) 0.069(4) 0.018(3) 0.059(5) 0.018(5)
 
_geom_special_details
;
 All esds (except the esd in the dihedral angle between two l.s. planes)
 are estimated using the full covariance matrix.  The cell esds are taken
 into account individually in the estimation of esds in distances, angles
 and torsion angles; correlations between esds in cell parameters are only
 used when they are defined by crystal symmetry.  An approximate (isotropic)
 treatment of cell esds is used for estimating esds involving l.s. planes.
;
 
loop_
 _geom_bond_atom_site_label_1
 _geom_bond_atom_site_label_2
 _geom_bond_distance
 _geom_bond_site_symmetry_2
 _geom_bond_publ_flag
Cu1 N3 1.922(4) . ?
Cu1 N1 1.972(4) . ?
Cu1 O2 1.990(3) . ?
Cu1 O1 2.015(4) . ?
Cu1 O3 2.261(4) . ?
O1 C1 1.268(5) 7 ?
O3 C4 1.235(5) 3_545 ?
O2 C4 1.272(5) . ?
N3 C1 1.294(5) . ?
N3 C2 1.450(5) . ?
C2 C3 1.529(9) . ?
C2 C4 1.541(7) . ?
C6 C7 1.380(7) . ?
C6 C5 1.412(7) . ?
C6 C10 1.510(7) . ?
N2 C7 1.348(7) . ?
N2 N1 1.349(6) . ?
C4 O3 1.235(5) 4_554 ?
C1 O1 1.268(5) 7 ?
C1 C1 1.535(8) 7 ?
C7 C9 1.502(8) . ?
C5 N1 1.328(6) . ?
C5 C8 1.501(9) . ?
C10 C6 1.510(7) 8_665 ?
 
loop_
 _geom_angle_atom_site_label_1
 _geom_angle_atom_site_label_2
 _geom_angle_atom_site_label_3
 _geom_angle
 _geom_angle_site_symmetry_1
 _geom_angle_site_symmetry_3
 _geom_angle_publ_flag
N3 Cu1 N1 158.16(19) . . ?
N3 Cu1 O2 81.56(15) . . ?
N1 Cu1 O2 94.55(15) . . ?
N3 Cu1 O1 83.60(14) . . ?
N1 Cu1 O1 97.69(16) . . ?
O2 Cu1 O1 164.58(14) . . ?
N3 Cu1 O3 101.34(18) . . ?
N1 Cu1 O3 100.02(17) . . ?
O2 Cu1 O3 88.48(15) . . ?
O1 Cu1 O3 98.55(17) . . ?
C1 O1 Cu1 110.0(3) 7 . ?
C4 O3 Cu1 127.9(3) 3_545 . ?
C4 O2 Cu1 116.1(3) . . ?
C1 N3 C2 126.2(4) . . ?
C1 N3 Cu1 115.9(3) . . ?
C2 N3 Cu1 117.9(3) . . ?
N3 C2 C3 112.0(5) . . ?
N3 C2 C4 106.4(4) . . ?
C3 C2 C4 110.8(5) . . ?
C7 C6 C5 105.2(4) . . ?
C7 C6 C10 128.2(4) . . ?
C5 C6 C10 126.6(4) . . ?
C7 N2 N1 111.7(4) . . ?
O3 C4 O2 124.9(4) 4_554 . ?
O3 C4 C2 117.6(4) 4_554 . ?
O2 C4 C2 117.5(4) . . ?
O1 C1 N3 129.6(4) 7 . ?
O1 C1 C1 118.5(5) 7 7 ?
N3 C1 C1 111.9(5) . 7 ?
N2 C7 C6 106.7(4) . . ?
N2 C7 C9 120.7(6) . . ?
C6 C7 C9 132.5(6) . . ?
N1 C5 C6 110.2(4) . . ?
N1 C5 C8 121.4(5) . . ?
C6 C5 C8 128.4(5) . . ?
C5 N1 N2 106.1(4) . . ?
C5 N1 Cu1 128.9(4) . . ?
N2 N1 Cu1 124.9(3) . . ?
C6 C10 C6 114.0(6) 8_665 . ?
 
_refine_diff_density_max    1.274
_refine_diff_density_min   -0.988
_refine_diff_density_rms    0.349

_shelxl_version_number 2013-2

_shelx_res_file
;
TITL p in P4(1)2(1)2
CELL 0.71073  13.5335  13.5335  14.9716  90.000  90.000  90.000
ZERR   4.00   0.0023   0.0023   0.0036   0.000   0.000   0.000
LATT -1
SYMM -X, -Y, 0.5+Z
SYMM 0.5-Y, 0.5+X, 0.25+Z
SYMM 0.5+Y, 0.5-X, 0.75+Z
SYMM 0.5-X, 0.5+Y, 0.25-Z
SYMM 0.5+X, 0.5-Y, 0.75-Z
SYMM Y, X, -Z
SYMM -Y, -X, 0.5-Z
SFAC C H N O CU
UNIT 76 96 24 24 8
size 0.2 0.1 0.2
L.S. 20
BOND
FMAP 2
PLAN 10
mpla 5 o1 n3 o2 n1 cu1
acta

WGHT    0.154000
EXTI    0.074871
FVAR       0.48815
CU1   5    0.473090    0.204464    0.035279    11.00000    0.04091    0.03958 =
         0.03166    0.00083   -0.00006    0.00711
O1    4    0.383002    0.295396    0.103976    11.00000    0.05314    0.05814 =
         0.03158    0.00132   -0.00055    0.02034
O3    4    0.381569    0.065051    0.044011    11.00000    0.05886    0.05495 =
         0.03752    0.00460    0.00767   -0.01679
O2    4    0.553726    0.139602   -0.059153    11.00000    0.04277    0.04158 =
         0.03750   -0.00023    0.00276    0.01009
N3    3    0.415464    0.267916   -0.067076    11.00000    0.04826    0.03991 =
         0.03084    0.00257    0.00327    0.01026
C2    1    0.451940    0.240433   -0.154651    11.00000    0.05250    0.04406 =
         0.03156   -0.00128    0.00304    0.00979
AFIX  13
H2A   2    0.397330    0.213582   -0.190129    11.00000   -1.20000
AFIX   0
C6    1    0.705232    0.172520    0.217541    11.00000    0.04261    0.03892 =
         0.04138   -0.00152   -0.00451   -0.00415
N2    3    0.551914    0.122961    0.204251    11.00000    0.04243    0.06171 =
         0.03558    0.00702   -0.00573   -0.01460
AFIX  43
H2B   2    0.496135    0.095338    0.215819    11.00000   -1.20000
AFIX   0
C4    1    0.529533    0.158837   -0.139392    11.00000    0.03883    0.03707 =
         0.03847   -0.00245    0.00479    0.00356
C1    1    0.347169    0.332198   -0.050379    11.00000    0.04427    0.03989 =
         0.02972   -0.00221    0.00226    0.00838
C7    1    0.632589    0.115515    0.256674    11.00000    0.05877    0.04921 =
         0.04700    0.00843   -0.01358   -0.01755
C5    1    0.662264    0.209681    0.138471    11.00000    0.04386    0.04658 =
         0.04134    0.00178   -0.00074   -0.00893
N1    3    0.569375    0.179014    0.131462    11.00000    0.04116    0.04476 =
         0.03401    0.00188   -0.00343   -0.00123
C10   1    0.809330    0.190670    0.250000    10.50000    0.04278    0.04278 =
         0.06653   -0.00930   -0.00930    0.00090
C9    1    0.630773    0.053460    0.339846    11.00000    0.10646    0.10093 =
         0.07823    0.04896   -0.05337   -0.06219
AFIX  33
H9A   2    0.566710    0.023893    0.346461    11.00000   -1.50000
H9B   2    0.644541    0.094301    0.390775    11.00000   -1.50000
H9C   2    0.679907    0.002528    0.335456    11.00000   -1.50000
AFIX   0
C8    1    0.708772    0.273456    0.068036    11.00000    0.08316    0.14079 =
         0.06027    0.03350   -0.01555   -0.06066
AFIX  33
H8A   2    0.661322    0.286881    0.021943    11.00000   -1.50000
H8B   2    0.764593    0.239752    0.042793    11.00000   -1.50000
H8C   2    0.730146    0.334524    0.094324    11.00000   -1.50000
AFIX   0
C3    1    0.497253    0.328281   -0.204069    11.00000    0.14218    0.06186 =
         0.06891    0.01780    0.05860    0.01798
AFIX  33
H3A   2    0.447797    0.378217   -0.212751    11.00000   -1.50000
H3B   2    0.521748    0.306831   -0.261037    11.00000   -1.50000
H3C   2    0.550670    0.354963   -0.169453    11.00000   -1.50000
AFIX   0
H10A  2    0.822328    0.156990    0.298238    11.00000    0.05125

HKLF 4

REM  p in P4(1)2(1)2
REM R1 =  0.0640 for    4608 Fo > 4sig(Fo)  and  0.0781 for all    5155 data
REM    155 parameters refined using      0 restraints

END

WGHT      0.1023      0.0000

REM Highest difference peak  1.274,  deepest hole -0.988,  1-sigma level  0.349
Q1    1   0.5119  0.3183 -0.3799  11.00000  0.05    0.92
Q2    1   0.9659  0.1162  0.3483  11.00000  0.05    0.90
Q3    1   0.9626  0.1545  0.2768  11.00000  0.05    0.90
Q4    1   0.4291  0.4782 -0.3033  11.00000  0.05    0.89
Q5    1   0.5537  0.3598 -0.2744  11.00000  0.05    0.87
Q6    1   0.7673 -0.0217  0.2871  11.00000  0.05    0.84
Q7    1   0.4611  0.5096 -0.2659  11.00000  0.05    0.82
Q8    1   0.9269  0.1018  0.2906  11.00000  0.05    0.82
Q9    1   0.8429  0.1221  0.2852  11.00000  0.05    0.74
Q10   1   0.8497  0.1503  0.2500  10.50000  0.05    0.72
;
_shelx_res_checksum    2153

_shelx_hkl_file
;
   0   0  -2   -0.22    0.76
   0   0   2    0.86    0.61
   0   0  -2   -1.92    0.90
   0   0  -3    1.72    1.10
   0   0  -3    1.30    1.31
   0   0  -4  857.71   12.85
   0   0  -4  831.06   13.47
   0   0  -5   -1.23    2.19
   0   0  -5    0.47    1.75
   0   0  -6   17.48    9.81
   0   0  -6    5.39    2.69
   0   0  -7    1.38    1.80
   0   0  -7    2.73    1.72
   0   0  -8 1175.15   26.47
   0   0  -8 1158.40   25.55
   0   0  -9    6.21    3.39
   0   0  -9    1.78    2.40
   0   0 -10    0.98    2.69
   0   0 -10   -0.86    2.60
   0   0 -11    1.45    2.02
   0   0 -11   -0.79    3.76
   0   0 -12 3462.06   50.23
   0   0 -12 3474.02   22.55
   0   0 -13   -1.03    3.74
   0   0 -13    4.92    2.53
   0   0 -14    1.94    3.30
   0   0 -14    3.34    2.18
   0   0 -15   -0.41    3.51
   0   0 -15    6.09    2.19
   0   0  16  384.94   12.62
   0   0 -16  410.96   14.45
   0   0  17    2.40    2.97
   0   0 -17    6.20    2.95
   0   0  18    3.44    4.75
   0   0 -18    3.50    2.82
   0   0  19    4.03    4.47
   0   0 -19   -1.75    3.36
   0   0  20   19.44    6.19
   0   0 -20   18.57    7.04
   0   0  21    1.65    2.43
   0   0 -21    5.81    3.88
   0   0  22    3.79    3.39
   0   0 -22    6.43    2.40
   0   0 -23   -4.86    3.46
  -1   0   0   -0.35    0.34
   0   1   0   -0.43    0.28
   1   0  -1   -0.11    0.38
   1   0   1   -0.21    0.37
   0   1  -1    0.29    0.37
   0  -1  -3  376.36    3.86
   1   0  -3  390.40    5.67
   1   0   3  384.45    4.14
   0  -1  -3  397.91    5.05
  -1   0  -3  398.05    4.12
   0   1  -3  392.79    6.21
   1   0  -3  389.05    5.73
   0   1  -3  385.60    3.01
   0   1   3  387.27    2.08
  -1   0  -4 1684.57   23.69
   0  -1  -4 1702.62   24.38
   1   0  -4 1697.65   23.90
   0  -1  -4 1655.03   23.11
  -1   0  -4 1687.44   23.65
   1   0  -4 1631.43   22.88
   0   1  -4 1736.41   24.44
   0   1  -4 1628.98   22.18
  -1   0   4 1654.53   22.30
   0   1   4 1658.55   22.42
  -1   0  -5  250.51    3.85
   0   1  -5  266.62    6.09
   0  -1  -5  264.84    4.25
   1   0  -5  240.72    6.59
   0  -1  -5  226.64    6.17
  -1   0  -5  242.29    5.59
   1   0  -5  243.55    5.12
   0   1  -5  247.15    5.66
   0   1  -5  241.15    2.38
  -1   0  -6    7.60    2.77
   0   1  -6   11.62    2.15
   0  -1  -6    7.28    3.49
   1   0  -6    6.20    2.52
   0  -1  -6    3.37    1.03
  -1   0  -6    2.07    2.37
   1   0  -6    9.81    1.86
   0   1  -6    7.57    2.15
   0   1  -6    3.33    0.65
  -1   0  -7   43.94    6.08
   0   1  -7   44.45    3.71
   0  -1  -7   53.32    6.62
   1   0  -7   44.41    7.63
   0  -1  -7   36.14    2.66
  -1   0  -7   48.70    8.17
   1   0  -7   42.34    6.41
   0   1  -7   52.97    5.80
  -1   0  -8  760.87   17.95
   0   1  -8  742.60   17.82
   0  -1  -8  747.64   17.13
   1   0  -8  755.98   18.49
   0  -1  -8  742.48   16.97
  -1   0  -8  809.11   20.58
   1   0  -8  713.18   16.98
   0   1  -8  764.41   18.23
   0   1  -8  748.24   15.48
  -1   0  -9 1495.59   33.37
   0   1  -9 1494.84   33.25
   0  -1  -9 1515.66   33.73
   1   0  -9 1568.30   34.43
   0  -1  -9 1508.70   32.44
  -1   0  -9 1547.56   34.03
   1   0  -9 1499.74   33.96
   0   1  -9 1535.70   37.25
  -1   0  -9 1603.48   32.89
  -1   0 -10  134.54   13.43
   0   1 -10  130.62    6.12
   0  -1 -10  124.81   12.68
   1   0 -10  151.09   13.92
   0  -1 -10  128.67    4.80
  -1   0 -10  139.41   12.73
   1   0 -10  137.19    5.15
   0   1 -10  138.70   17.13
  -1   0 -11  104.13    8.63
   0   1 -11   98.31    7.61
   0  -1 -11   92.59    9.36
   1   0 -11   81.92    7.04
  -1   0 -11   96.63   11.93
   1   0 -11   85.62   10.09
   0   1 -11  100.28   11.62
   0   1 -12  626.32   20.21
   0  -1 -12  606.44   12.57
   1   0 -12  595.33   18.22
   0  -1 -12  643.24   17.88
  -1   0 -12  751.11   15.98
   1   0 -12  643.84   12.96
   0   1 -12  624.30   14.38
   0   1 -13  328.86   10.51
   0  -1 -13  338.45   22.08
   1   0 -13  366.57   11.19
   1   0  13  321.95   11.66
   0  -1 -13  323.43   13.98
  -1   0 -13  344.15   10.09
   1   0 -13  340.06   10.01
   0   1 -13  308.14   15.31
   0   1 -14   58.02   12.09
   0  -1 -14   58.50    8.99
   1   0 -14   63.03   13.27
   1   0  14   60.33   16.80
   0  -1 -14   55.52    9.55
  -1   0 -14   59.66   10.99
   1   0 -14   54.71   11.66
   0   1 -14   52.06    9.71
   0  -1 -15  117.10   10.15
   1   0 -15  131.78   22.69
   1   0  15  114.84    8.83
   0  -1 -15  137.57   14.19
  -1   0 -15  119.08   21.36
   1   0 -15  107.97   16.85
   0   1 -15  125.69    8.35
   1   0 -16   44.91    8.18
   1   0  16   36.96   11.15
   0  -1  16   28.30   10.50
   0  -1 -16   36.12    8.61
  -1   0 -16   25.60    6.87
   1   0 -16   47.55    9.75
   0   1 -16   31.77    8.66
   1   0 -17   23.79    5.23
   1   0  17   24.87    5.54
   0  -1  17   23.67    5.61
   0   1  17   28.52    5.96
   0  -1 -17   21.34    4.83
  -1   0 -17   23.30    4.73
   1   0 -17   26.97    7.08
   0   1 -17   18.99    5.13
   1   0  18    5.73    5.60
   0  -1  18    6.65    4.07
   0   1  18   17.64    6.67
   0  -1 -18    1.90    2.87
  -1   0 -18    9.92    5.01
   1   0 -18    4.40    3.53
   0   1 -18   -0.91    3.43
   1   0  19    6.45    4.14
   0  -1  19   23.83    6.48
   0   1  19   14.30    6.43
  -1   0  19   15.96    5.66
   0  -1 -19   12.35    4.45
  -1   0 -19   24.92    6.01
   1   0 -19    8.07    3.53
   0   1 -19   11.37    4.85
   1   0  20  137.45   12.17
   0  -1  20  122.29   26.48
   0   1  20  132.13   27.51
  -1   0  20  125.27   18.09
   0  -1 -20  109.68   22.69
  -1   0 -20  107.44   23.52
   1   0 -20  110.12   18.44
   0   1 -20  116.45   20.86
   1   0  21   25.43    9.83
   0  -1  21   43.45    7.61
   0   1  21   41.71   11.92
  -1   0  21   27.70    9.44
   0  -1 -21   26.41    7.52
  -1   0 -21   29.44    8.63
   1   0 -21   23.32    8.17
   0   1 -21   28.40    8.98
   1   0  22   -0.33    4.41
   0  -1  22   12.64    7.03
   0   1  22    5.88    4.72
  -1   0  22    4.57    3.40
   0  -1 -22    5.17    2.32
  -1   0 -22    0.21    3.56
   1   0 -22    2.18    1.77
   0   1 -22   -1.47    4.37
   0  -1 -23    6.89    3.10
   1  -1   0    0.18    0.24
   1   1   0   -0.41    0.24
  -1   1   0   -0.07    0.14
  -1  -1   0   -0.64    0.42
   1   1  -1   -0.66    0.56
   1  -1  -1   -0.17    0.67
   1  -1   1   -0.63    0.71
   1   1   1   -1.34    0.46
  -1  -1  -1    0.36    0.40
  -1   1  -1   -0.57    0.42
   1   1  -1   -0.30    0.72
  -1  -1   1    0.29    0.27
  -1  -1  -1   -0.22    0.50
   1   1  -2 4040.29   54.95
   1   1  -2 3679.93   49.53
   1   1  -3 1193.25   18.70
   1  -1  -3 1206.76   17.62
   1  -1   3 1243.80   18.42
   1   1   3 1141.32   16.43
  -1  -1  -3 1211.62   17.43
   1  -1  -3 1195.70   17.74
  -1   1  -3 1223.40   18.77
   1   1  -3 1196.29   17.58
  -1  -1   3 1205.81   16.67
   1   1  -3 1220.55   16.96
  -1  -1  -4  118.00    3.01
   1   1  -4  115.03    7.11
   1  -1  -4  118.73    5.32
   1  -1   4  122.22    3.73
  -1  -1  -4  126.81    3.03
   1  -1  -4  116.09    4.41
  -1   1  -4  120.43    3.91
   1   1  -4  118.09    4.24
  -1   1   4  120.63    2.37
  -1  -1   4  116.37    2.15
   1   1  -4  118.25    2.03
  -1  -1  -5 2222.62   31.30
   1   1  -5 2203.73   31.72
   1  -1  -5 2224.11   31.55
  -1  -1  -5 2176.63   30.85
   1  -1  -5 2144.14   29.72
  -1   1  -5 2145.37   30.08
   1   1  -5 2204.95   31.76
  -1  -1   5 2245.31   30.38
  -1   1   5 2172.54   29.24
   1   1  -5 2264.03   30.61
  -1   1  -6    8.53    3.22
  -1  -1  -6    9.92    4.09
   1   1  -6   11.07    2.37
   1  -1  -6   13.06    2.59
  -1  -1  -6    7.85    1.80
   1  -1  -6   11.82    2.06
  -1   1  -6    8.02    3.31
   1   1  -6   14.43    2.58
  -1  -1   6   10.22    1.13
  -1   1  -7 1452.96   22.20
  -1  -1  -7 1550.72   25.32
   1   1  -7 1478.89   22.83
   1  -1  -7 1523.95   22.80
  -1  -1  -7 1460.36   21.48
   1  -1  -7 1481.31   22.00
  -1   1  -7 1454.69   21.56
   1   1  -7 1467.54   21.69
  -1   1  -8   46.32    6.15
  -1  -1  -8   43.01    5.00
   1   1  -8   49.63    3.69
   1  -1  -8   42.78    5.53
  -1  -1  -8   48.82    5.57
   1  -1  -8   49.24    5.99
  -1   1  -8   43.75    4.19
   1   1  -8   57.91    7.44
  -1   1  -8   41.29    3.60
  -1  -1  -8   42.81    2.77
  -1   1  -9  248.35   14.93
  -1  -1  -9  264.59   14.34
   1   1  -9  258.28   14.24
   1  -1  -9  337.37   17.60
  -1  -1  -9  273.41   15.63
   1  -1  -9  262.83   13.35
  -1   1  -9  249.94   13.12
   1   1  -9  264.89   13.69
  -1   1  -9  257.92   12.48
  -1  -1  -9  284.40   13.47
  -1   1 -10    3.11    2.55
  -1  -1 -10    6.19    3.47
   1   1 -10    8.79    2.89
   1  -1 -10   -0.17    3.80
  -1  -1 -10    4.27    4.72
   1  -1 -10    6.68    2.77
  -1   1 -10    9.90    3.53
   1   1 -10   -0.81    3.13
  -1   1 -10    2.69    0.80
  -1  -1 -11 2856.45   42.58
   1   1 -11 2678.13   40.28
   1  -1 -11 3057.51   44.49
  -1  -1 -11 2981.54   42.44
   1  -1 -11 2766.64   42.81
  -1   1 -11 2892.32   40.96
   1   1 -11 2922.66   44.40
   1   1 -12  300.47    9.02
   1  -1 -12  296.45   10.92
   1  -1  12  302.95    9.47
  -1  -1 -12  316.18   11.29
   1  -1 -12  312.60   10.72
  -1   1 -12  313.85   12.60
   1   1 -12  318.69   12.33
   1   1 -13   82.61    9.00
   1  -1 -13   81.46   15.81
   1  -1  13   96.47   12.72
   1   1  13   97.10   20.41
  -1  -1 -13   96.02   12.54
   1  -1 -13  311.11   39.00
  -1   1 -13   87.40   10.15
   1   1 -13   88.30    8.29
   1   1 -14  232.72   11.86
   1  -1 -14  216.60   17.98
   1  -1  14  229.54   11.39
   1   1  14  225.49   13.67
  -1  -1 -14  239.35   13.06
   1  -1 -14  247.53   12.79
  -1   1 -14  218.44   11.06
   1   1 -14  240.64   12.13
   1   1 -15    4.07    2.04
   1  -1 -15    1.10    2.85
   1  -1  15    0.93    3.30
   1   1  15    4.41    4.09
  -1  -1 -15    6.34    3.84
   1  -1 -15    4.93    2.71
  -1   1 -15    8.75   10.91
   1   1 -15   -0.61    3.52
   1   1 -16   28.68    5.56
   1  -1 -16   28.02    5.66
   1  -1  16   30.91    8.54
   1   1  16   27.55    6.52
  -1  -1 -16   27.23    5.06
   1  -1 -16   21.12    5.98
  -1   1 -16   30.15    8.88
   1   1 -16   30.03    5.46
   1   1 -17  313.11   10.47
   1  -1 -17  289.38   25.60
   1  -1  17  291.91   34.51
   1   1  17  342.82   10.05
  -1  -1 -17  296.54   31.02
   1  -1 -17  297.37   32.52
  -1   1 -17  319.64    9.65
   1   1 -17  310.70   11.32
   1  -1  18    2.68    3.27
   1   1  18   10.21    5.40
  -1  -1  18   12.39    6.27
  -1  -1 -18    7.72    3.30
   1  -1 -18    7.49    4.40
  -1   1 -18    6.12    3.08
   1   1 -18   11.63    4.97
   1  -1  19   77.83   12.51
   1   1  19   65.83   14.25
  -1  -1  19   67.12   18.58
  -1   1  19   66.44   20.60
   1  -1 -19   55.14   13.36
  -1   1 -19   64.06   13.19
   1   1 -19   68.69   17.85
   1  -1  20    1.93    4.06
   1   1  20    1.59    2.93
  -1  -1  20    0.42    4.45
  -1   1  20    6.58    7.58
  -1  -1 -20    2.82    3.29
   1  -1 -20    2.19    2.87
  -1   1 -20    3.48    4.58
   1   1 -20    8.61    3.21
   1  -1  21   59.22    7.43
   1   1  21   65.43   15.17
  -1  -1  21   60.79   15.44
  -1   1  21   52.22   22.63
  -1  -1 -21   69.22   13.30
   1  -1 -21   48.50   16.43
  -1   1 -21   47.59   15.77
   1   1 -21   59.82   16.60
   1  -1  22    1.01    3.06
   1   1  22   -5.16    4.74
  -1  -1  22    5.53    4.11
  -1   1  22    4.52    3.02
  -1  -1 -22    5.33    3.56
   1  -1 -22   -0.10    2.60
  -1   1 -22   -0.55    4.51
   1   1 -22   -0.17    3.33
  -1  -1 -23   18.97    4.60
   1   1 -23   25.11    6.39
  -2   0   0   46.48    4.16
   0   2  -1  173.51    4.11
   0   2  -2  220.85    3.05
   0  -2   2  224.06    2.18
   0  -2  -2  223.06    3.78
   2   0  -2  240.82    4.67
   2   0   2  225.34    3.30
   0  -2  -2  238.47    3.51
  -2   0  -2  229.51    3.63
   0   2  -2  222.98    4.48
   2   0  -2  234.52    5.76
  -2   0   2  223.39    2.19
   0  -2   2  230.85    3.12
   0  -2  -2  228.81    5.06
   0   2  -3  175.47    2.97
   0  -2  -3  182.52    3.11
   2   0  -3  180.73    4.15
   2   0   3  178.15    5.10
   0  -2  -3  181.35    2.89
  -2   0  -3  177.71    6.58
   0   2  -3  187.62    5.64
   2   0  -3  185.95    5.01
   0  -2  -3  185.62    5.00
   0   2   3  172.96    2.89
   0   2  -4   63.38    2.69
   0  -2  -4   57.98    2.83
   2   0  -4   60.93    6.57
   2   0   4   60.19    6.04
   0  -2  -4   61.68    6.33
  -2   0  -4   59.96    4.22
   0   2  -4   64.77    4.69
   2   0  -4   65.57    7.76
   0  -2  -4   58.17    2.77
   0   2   4   68.48    2.40
   0   2  -5 2409.59   34.22
   2   0  -5 2525.21   36.13
   2   0   5 2549.48   35.59
   0  -2  -5 2461.66   34.00
  -2   0  -5 2586.89   36.05
   0   2  -5 2525.96   35.51
   2   0  -5 2541.76   35.35
   0   2   5 2459.51   33.42
  -2   0   5 2404.93   32.53
   0   2  -6 1134.75   17.99
   0  -2  -6 1103.14   16.58
   2   0  -6 1100.80   16.81
   2   0   6 1123.04   19.17
   0  -2  -6 1139.17   17.76
   2   0  -6 1142.87   17.01
   0   2  -6 1164.18   17.73
  -2   0   6 1150.93   15.78
   0   2   6 1219.89   16.85
   0   2  -7  341.37    5.12
   2   0  -7  350.36    7.66
   2   0   7  363.41    7.47
   0  -2  -7  363.32    8.60
   2   0  -7  348.30    5.24
   0   2  -7  362.56    6.07
   0   2  -8   55.94    5.68
   0  -2  -8   54.77    9.59
   2   0  -8   50.32    4.90
   2   0   8   53.76    5.69
   0  -2  -8   51.87    6.06
  -2   0  -8  156.92   15.79
   0   2  -8   61.33   10.89
   0   2  -9  378.65   18.84
   0  -2  -9  398.70   20.97
   2   0  -9  388.52   19.75
   2   0   9  411.04   21.44
   0  -2  -9  397.14   19.57
  -2   0  -9  446.71   12.02
   2   0  -9  388.19   19.53
   0   2  -9  370.97   21.40
   0   2 -10 2229.63   55.84
   0  -2 -10 2178.02   56.02
   2   0 -10 2230.69   57.16
   2   0  10 2308.20  183.49
   0  -2 -10 2274.18  180.73
  -2   0 -10 2295.87  182.50
   2   0 -10 2198.88   54.66
   0   2 -10 2201.37   56.17
   0   2 -11  897.70   19.83
   0  -2 -11  907.89   22.41
   2   0 -11  903.85   18.56
   2   0  11  862.02   20.64
   0  -2 -11  895.67   15.37
  -2   0 -11  904.04   15.84
   2   0 -11  865.76   16.89
   0   2 -11  913.92   16.48
  -2   0 -11  872.11   11.30
   0   2 -12   23.67    5.12
   0  -2 -12   35.96    6.81
   2   0 -12   29.09    4.39
   2   0  12   34.18    7.28
   0  -2 -12   31.80    6.75
  -2   0 -12   26.04    4.96
   2   0 -12   30.00    6.24
   0   2 -12   36.04    7.23
   0   2 -13    8.10    3.93
   0  -2 -13   13.78    4.60
   2   0 -13    4.79    2.08
   2   0  13   -1.49    3.70
   0  -2 -13   -0.42    2.93
  -2   0 -13    4.83    4.04
   2   0 -13   -1.04    3.01
   0   2 -13   13.10    4.68
   0   2 -14    7.18    3.93
   0  -2 -14    7.67    3.73
   2   0 -14    4.71    3.56
   2   0  14    7.93    5.38
   0  -2 -14   10.52    3.12
  -2   0 -14   11.45    5.20
   2   0 -14    3.85    3.15
   0   2 -14    1.00    2.99
   0  -2 -15  178.27    8.31
   2   0 -15  184.34   28.77
   2   0  15  178.41    8.42
   0  -2  15  182.30   16.19
   0  -2 -15  162.49   15.42
  -2   0 -15  172.47   15.17
   2   0 -15  164.45    7.87
   0   2 -15  186.30   19.83
   2   0 -16   11.57    5.71
   2   0  16    3.58    4.30
   0  -2  16    2.14    2.33
   0  -2 -16    6.39    4.89
  -2   0 -16    3.01    2.51
   2   0 -16    3.06    3.25
   0   2 -16    3.31    4.63
   2   0 -17  140.15   24.32
   2   0  17  136.51   32.16
   0  -2  17  135.16   20.07
   0   2  17  136.46   15.69
   0  -2 -17  135.02   16.91
  -2   0 -17  125.92   14.50
   2   0 -17  150.17   21.89
   0   2 -17  124.72   18.33
   2   0 -18  140.02   26.75
   2   0  18  161.10   18.38
   0  -2  18  143.88   21.18
   0   2  18  144.14   15.54
   0  -2 -18  158.41   12.96
  -2   0 -18  132.30   15.07
   2   0 -18  132.71   18.89
   0   2 -18  170.17   15.71
   2   0 -19   -1.32    4.19
   2   0  19    6.77    5.23
   0  -2  19    8.42    3.49
   0   2  19    6.37    5.03
   0  -2 -19    4.14    2.15
  -2   0 -19    4.81    5.39
   2   0 -19    4.16    2.72
   0   2 -19    8.03    4.72
   2   0  20    4.95    4.82
   0  -2  20   -2.77    4.65
   0   2  20    6.07    3.83
  -2   0  20    2.54    2.47
   0  -2 -20    2.21    1.67
  -2   0 -20    4.24    3.08
   2   0 -20    1.35    3.51
   0   2 -20   -1.90    4.55
   2   0  21   33.11    8.18
   0  -2  21   21.25   10.32
   0   2  21   19.24    9.38
  -2   0  21   28.55    9.82
   0  -2 -21   32.61    6.97
  -2   0 -21   22.15    8.03
   2   0 -21   18.34    5.05
   0   2 -21   31.31    9.04
   2   0  22  101.10   28.31
   0  -2  22   96.09   31.24
   0   2  22   91.70   24.76
  -2   0  22  127.07   13.54
   0  -2 -22  128.11   21.03
  -2   0 -22  111.67   20.68
   2   0 -22   69.30   28.18
   0   2 -22   81.25   24.69
   1   2  -2 3414.98   46.18
   2   1  -2 3328.61   45.57
   2  -1  -2 3262.62   45.05
   2  -1   2 3368.24   45.85
   2   1   2 3283.45   44.84
   1   2   2 3412.28   46.22
  -1  -2  -2 3208.92   43.64
  -2  -1  -2 3379.74   47.44
  -2   1  -2 3291.82   45.36
  -1   2  -2 3474.01   47.88
   1   2  -2 3395.66   46.47
  -2   1   2 3450.21   46.42
   2   1  -2 3386.11   46.36
  -1  -2   2 3360.01   45.56
  -1  -2  -2 3337.98   45.60
  -2  -1   2 3239.57   43.94
   1  -2  -3   91.18    3.06
   2   1  -3  102.52    3.74
   2  -1  -3   43.88    8.75
   2   1   3   43.22    6.22
   1  -2   3   47.73    8.47
  -1  -2  -3   38.49    5.44
  -2  -1  -3   94.24    2.58
  -2   1  -3   46.24    9.10
  -1   2  -3  100.93    4.57
   2  -1  -3   44.76    6.33
  -2   1   3  104.74    5.33
   1   2  -3   52.91   10.60
   2   1  -3   99.02    4.45
  -1  -2  -4  641.31   10.00
   1   2  -4  621.01   10.29
   1  -2  -4  620.36    9.57
   2   1  -4  605.73   10.47
   2  -1  -4  624.23    9.70
   2  -1   4  593.33    9.86
   2   1   4  615.08    9.83
   1  -2   4  617.96   10.25
  -1  -2  -4  599.50    9.54
  -2  -1  -4  632.31   10.33
   1  -2  -4  627.40    9.57
  -2   1  -4  609.21    9.62
   2  -1  -4  616.11    9.25
  -1   2  -4  613.54   10.46
   1   2  -4  625.47   10.18
   2   1  -4  616.63   12.32
  -1  -2   4  614.84    9.63
  -1  -2  -4  606.06    9.28
  -2  -1   4  611.63    9.19
   1   2  -5  333.85    5.07
   1  -2  -5  277.48    4.22
   2  -1  -5  337.75    4.71
   2  -1   5  289.18    7.99
   2   1   5  327.13    5.93
   1  -2   5  323.69    4.29
  -1  -2  -5  335.15    7.39
   1  -2  -5  290.93    5.75
  -2   1  -5  327.96    4.60
   2  -1  -5  316.06    4.53
  -1   2  -5  282.97    7.43
   1   2  -5  357.36    8.76
  -1   2   5  312.16    2.58
  -1  -2  -5  323.78    4.12
  -2  -1   5  316.81    2.98
  -1  -2  -6  377.31    5.54
   1   2  -6  380.83    6.90
   1  -2  -6  350.91    4.77
   2   1  -6  354.67    4.78
   2  -1  -6  381.65    6.25
   2  -1   6  345.51    5.74
   2   1   6  383.81    6.02
   1  -2   6  367.51    7.81
  -1  -2  -6  367.07    4.74
  -2  -1  -6  360.92    7.19
   1  -2  -6  360.53    4.68
  -2   1  -6  365.38    5.48
   2  -1  -6  372.82    4.43
  -1   2  -6  351.36    6.78
   1   2  -6  381.33    7.29
   2   1  -6  358.88    5.57
  -1  -2   6  348.26    3.16
  -1   2   6  374.28    3.08
  -1  -2  -6  367.58    3.34
  -2  -1   6  387.02    3.21
  -2  -1  -6  364.76    3.53
  -1  -2  -7  567.37   12.26
   1   2  -7  555.97    9.95
   2   1  -7  558.44   12.23
   2  -1  -7  563.34   10.66
   2  -1   7  576.89   11.03
   2   1   7  542.69    9.48
  -1  -2  -7  568.91   11.05
  -2  -1  -7  570.13   12.16
   1  -2  -7  578.75   11.20
  -2   1  -7  561.63   10.17
   2  -1  -7  577.68   11.65
  -1   2  -7  563.23   10.86
   1   2  -7  552.91   10.95
   2   1  -7  559.50   11.50
  -2   1   7  547.74    7.80
  -2  -1   7  558.54    8.21
  -1   2   7  551.61    7.97
  -2  -1  -7  583.25    9.10
  -1  -2  -8  239.90   12.70
   1   2  -8  241.75   12.61
   1  -2  -8  263.50   14.25
   2   1  -8  246.33   12.51
   2  -1  -8  246.23   12.71
   2  -1   8  263.73   14.00
   2   1   8  237.52   12.40
  -1  -2  -8  238.33   12.81
  -2  -1  -8  255.94   13.19
   1  -2  -8  267.85   14.85
  -2   1  -8  254.69   13.09
   2  -1  -8  241.93   12.95
  -1   2  -8  263.06   13.45
   1   2  -8  244.48   13.58
   2   1  -8  268.33   14.35
  -2  -1   8  244.47   11.77
  -2  -1  -8  240.81   11.80
  -1  -2  -9 1113.99   25.26
   1  -2  -9 1141.70   25.40
   2   1  -9 1153.84   26.17
   2  -1  -9 1076.95   27.26
   2  -1   9 1162.29   26.61
   2   1   9 1076.66   24.85
  -1  -2  -9 1127.10   25.12
  -2  -1  -9 1099.36   25.04
   1  -2  -9 1138.11   25.64
  -2   1  -9 1100.02   25.00
   2  -1  -9 1067.77   24.45
  -1   2  -9 1130.67   29.31
   2   1  -9 1165.04   27.39
   1   2  -9 1080.49   25.50
  -1  -2 -10  492.82   16.73
   1   2 -10  499.55   17.90
   1  -2 -10  489.01   19.49
   2   1 -10  487.23   16.85
   2  -1 -10  501.68   16.99
   2  -1  10  489.11   20.14
   2   1  10  497.91   14.78
   1  -2  10  508.15   21.56
  -1  -2 -10  491.06   13.71
  -2  -1 -10  481.57   13.79
   1  -2 -10  479.38   16.24
  -2   1 -10  519.83   15.52
   2  -1 -10  485.56   13.98
  -1   2 -10  489.87   16.25
   2   1 -10  481.11   14.77
   1   2 -10  488.91   14.25
  -1  -2 -11   53.38   11.14
   1   2 -11   47.07   11.05
   1  -2 -11   57.39   14.36
   2   1 -11   67.25   16.52
   2  -1 -11   52.93   15.39
   2  -1  11   58.11    9.24
   2   1  11   42.96   11.66
   1  -2  11   50.19   12.27
  -1  -2 -11   63.49   14.03
  -2  -1 -11   47.23   11.62
   1  -2 -11   38.93    5.83
  -2   1 -11   47.09    7.65
   2  -1 -11   55.10   13.48
  -1   2 -11   51.52    7.45
   2   1 -11   49.01    9.64
   1   2 -11   64.91   11.15
  -2  -1 -11   31.60    3.64
  -1  -2 -12   71.19   15.28
   1   2 -12   62.00    5.60
   1  -2 -12   62.13   13.95
   2   1 -12   71.98   14.17
   2  -1 -12   70.41   14.55
   2  -1  12   59.66   12.56
   2   1  12   66.15   12.77
   1  -2  12   68.01    8.26
  -1  -2 -12   71.31   12.32
  -2  -1 -12   62.83   12.90
   1  -2 -12   61.56    9.61
  -2   1 -12   63.17   12.44
   2  -1 -12   67.15   13.92
  -1   2 -12   67.21    6.06
   2   1 -12   69.86   13.11
   1   2 -12   73.44   15.19
   1   2 -13  531.20   15.55
   1  -2 -13  510.86   21.43
   2   1 -13  498.76   18.62
   2  -1  13  493.88   14.97
   2   1  13  522.32   14.43
   1  -2  13  528.36   15.34
  -1  -2 -13  526.46   14.12
  -2  -1 -13  507.33   13.05
   1  -2 -13  507.49   11.91
   2  -1 -13  514.32   12.54
  -1   2 -13  487.79   17.09
   2   1 -13  528.10   14.20
   1   2 -13  525.17   19.46
   1   2 -14  111.46   21.12
   1  -2 -14  117.28   22.30
   2   1 -14  108.99    8.86
   2  -1 -14  104.65   18.28
   2  -1  14  134.83   24.54
   2   1  14  109.07   10.60
   1  -2  14  110.38   22.11
   1   2  14  123.86   10.38
  -1  -2 -14  110.71   13.95
  -2  -1 -14  122.51   10.02
   1  -2 -14  132.37   15.41
  -2   1 -14   99.86   12.03
   2  -1 -14  109.21   15.44
  -1   2 -14  122.27   14.29
   2   1 -14  118.69   17.76
   1   2 -14  105.94    7.13
   1   2 -15   93.41    7.91
   1  -2 -15   92.92   18.75
   2   1 -15   93.28   17.13
   2  -1 -15   91.82   15.81
   2  -1  15   95.10    9.33
   2   1  15   85.68   18.70
   1  -2  15   79.73   15.90
   1   2  15   86.94   12.60
  -1  -2 -15   92.16   17.00
  -2  -1 -15   80.84   20.16
   1  -2 -15   87.58   13.49
  -2   1 -15   86.04    8.55
   2  -1 -15  102.52   18.39
  -1   2 -15   91.92   16.15
   2   1 -15   82.46   13.49
   1   2 -15   85.07    9.83
   1   2 -16   28.36    8.89
   1  -2 -16   36.10    8.22
   2   1 -16   29.52    5.17
   2  -1 -16   27.16    6.70
   2  -1  16   39.01    8.22
   2   1  16   34.23    7.72
   1  -2  16   31.88    6.58
   1   2  16   35.64    8.15
  -1  -2 -16   30.22    7.73
  -2  -1 -16   42.17    6.64
   1  -2 -16   22.04    5.96
  -2   1 -16   26.89    7.41
   2  -1 -16   30.83    6.91
  -1   2 -16   35.54    6.07
   2   1 -16   28.25    8.77
   1   2 -16   30.31    7.85
   1  -2 -17   10.07    6.90
   2   1 -17   28.86    6.59
   2  -1 -17   15.11    5.34
   2  -1  17   41.76   13.46
   2   1  17   20.53    6.26
   1  -2  17   13.70    4.32
   1   2  17   13.93    5.15
  -1  -2 -17   17.75    5.46
  -2  -1 -17   19.50    4.74
   1  -2 -17   12.90    3.61
  -2   1 -17   14.70    5.42
   2  -1 -17   17.89    5.59
  -1   2 -17   43.35   12.20
   1   2 -17   18.91    5.19
   2   1 -18   57.03   11.17
   2  -1 -18   72.18   12.67
   2  -1  18   67.76   15.03
   2   1  18  132.40   34.46
   1  -2  18   69.65   15.56
   1   2  18   55.04   16.33
  -1  -2  18   63.54   10.88
  -1  -2 -18   51.58   14.44
  -2  -1 -18   46.51    9.23
   1  -2 -18   52.29   10.24
  -2   1 -18   50.97   14.64
   2  -1 -18   49.27   12.38
  -1   2 -18   65.43   10.64
   2   1 -18   62.90   16.57
   1   2 -18   49.76   12.11
   2   1 -19   88.15   25.13
   2  -1 -19  110.55   14.46
   2  -1  19  116.98   14.90
   2   1  19  110.77   15.45
   1  -2  19  121.31   15.82
   1   2  19  109.89   13.08
  -1  -2  19  108.41   24.24
  -1   2  19   94.28   23.88
  -1  -2 -19  130.46   17.76
  -2  -1 -19  116.26   11.60
   1  -2 -19   80.88   20.96
  -2   1 -19   93.33   21.72
   2  -1 -19   85.09   19.77
  -1   2 -19   98.19   20.33
   2   1 -19   83.19   18.55
   1   2 -19  274.67   66.11
   2  -1  20   33.52    9.11
   2   1  20   21.70   11.26
   1  -2  20   15.25    7.02
   1   2  20   32.38    7.44
  -1  -2  20   25.38    5.75
  -1   2  20   18.95    7.57
  -2  -1  20   30.24    8.42
  -1  -2 -20   24.37    3.75
  -2  -1 -20   32.19    6.85
   1  -2 -20   20.60    6.39
  -2   1 -20   21.10    6.64
   2  -1 -20   24.04    6.42
  -1   2 -20   23.62    8.38
   2   1 -20   27.14    7.55
   1   2 -20   21.12    6.50
   2  -1  21   24.53   11.48
   2   1  21   28.67    9.80
   1  -2  21   26.92   13.42
   1   2  21   26.95    8.33
  -1  -2  21   26.87    5.43
  -1   2  21   22.19    8.47
  -2  -1  21   29.34    8.06
  -2   1  21   22.27    8.68
  -1  -2 -21   33.65    8.57
  -2  -1 -21   26.50    5.83
   1  -2 -21   29.58    7.44
   2  -1 -21   24.92    9.05
  -2   1 -21   23.65    9.59
  -1   2 -21   25.26   10.66
   2   1 -21   26.45    6.27
   1   2 -21   15.51    8.51
   2  -1  22   -0.30    2.48
   1  -2  22   -7.62    4.43
   1   2  22    2.27    2.45
  -1  -2  22    4.65    3.41
  -2  -1  22   -5.39    3.95
  -2   1  22    3.91    5.88
  -1  -2 -22   -0.27    3.17
  -2  -1 -22   14.70    4.74
  -2   1 -22    4.14    4.90
  -1   2 -22    8.92    4.93
   2   1 -22    2.12    1.31
   1   2 -22    4.31    3.33
  -1  -2 -23    9.77    3.61
   2   1 -23    3.87    4.14
   2  -2   1 3461.88   47.09
   2   2   1 3323.67   45.05
  -2  -2  -1 3231.82   44.12
  -2   2  -1 3268.47   44.32
  -2  -2   1 3273.53   45.09
  -2  -2  -1 3281.35   45.09
   2   2  -2 1517.37   21.59
   2  -2  -2 1495.31   21.46
   2  -2   2 1526.63   21.92
   2   2   2 1505.14   21.13
  -2  -2  -2 1493.49   21.22
  -2   2  -2 1542.75   22.47
  -2   2   2 1505.63   20.33
   2   2  -2 1556.06   22.42
  -2  -2   2 1518.59   22.07
  -2  -2  -2 1488.89   20.96
   2   2  -3  419.40   20.31
   2  -2  -3  411.80   20.18
   2  -2   3  369.20    4.10
   2   2   3  373.94    5.05
  -2  -2  -3  408.98   19.72
  -2   2  -3  375.31    7.60
  -2   2   3  376.95    3.39
   2   2  -3  379.83    9.04
  -2  -2   3  395.36    3.89
  -2  -2  -3  386.67    5.27
   2   2  -4  394.39    6.54
   2  -2  -4  402.34   20.31
   2  -2   4  396.57    4.69
   2   2   4  419.92   21.66
  -2  -2  -4  406.92   19.94
   2  -2  -4  395.24    3.64
  -2   2  -4  386.44    4.55
   2   2  -4  391.02    5.49
  -2  -2   4  398.00    3.85
  -2  -2  -4  402.95   19.39
   2   2  -5  144.85    6.29
   2  -2  -5  123.33    5.51
   2  -2   5  130.67    4.19
   2   2   5  121.23    4.76
  -2  -2  -5  125.47    5.38
   2  -2  -5  122.94    4.53
  -2   2  -5  120.09    3.43
   2   2  -5  136.55    7.84
  -2  -2   5  129.04    5.51
  -2  -2  -5  121.10    4.41
   2   2  -6  281.38    5.16
   2  -2  -6  284.52    6.71
   2   2   6  294.67    6.71
  -2  -2  -6  279.08    5.17
   2  -2  -6  298.62    3.61
  -2   2  -6  300.19    5.85
   2   2  -6  306.32    6.74
  -2  -2   6  301.95    4.57
  -2  -2  -6  295.96    5.39
   2   2  -7  817.65   13.40
   2  -2  -7  837.66   13.36
   2  -2   7  824.81   13.66
   2   2   7  827.52   13.44
  -2  -2  -7  844.57   13.49
   2  -2  -7  834.83   13.15
  -2   2  -7  789.03   13.96
   2   2  -7  862.45   14.17
  -2  -2   7  809.29   12.08
  -2  -2  -7  804.25   12.17
   2   2  -8   62.95    7.40
   2  -2  -8   60.48    6.05
   2  -2   8   64.20    5.39
   2   2   8   64.33    8.07
  -2  -2  -8   63.43    6.21
   2  -2  -8   65.13    7.06
  -2   2  -8   53.06    5.45
   2   2  -8   70.35    7.73
  -2  -2   8   58.67    3.90
  -2   2   8   55.82    3.20
  -2  -2  -8   71.46    4.96
   2   2  -9   58.15    5.26
   2  -2  -9   51.69    7.45
   2  -2   9   57.54    5.64
   2   2   9   55.43   11.59
  -2  -2  -9   61.24    7.81
   2  -2  -9   58.53    6.52
  -2   2  -9   60.85    6.05
   2   2  -9   68.27   11.24
  -2  -2  -9   51.48    4.19
   2   2 -10    2.89    2.04
   2  -2 -10    4.59    3.06
   2  -2  10    3.76    2.69
   2   2  10    2.20    1.82
  -2  -2 -10   -0.43    2.83
   2  -2 -10   -1.26    2.38
  -2   2 -10    4.05    4.34
   2   2 -10   13.27    5.56
   2   2 -11  257.58    8.90
   2  -2 -11  250.57    7.99
   2  -2  11  256.51    9.45
   2   2  11  258.99   10.05
  -2  -2 -11  262.73    8.13
  -2   2 -11  261.16    8.91
   2   2 -11  246.71   18.99
   2   2 -12  997.86   48.48
   2  -2 -12  850.38   35.06
   2  -2  12  810.51   33.90
   2   2  12  819.48   34.76
  -2  -2 -12  780.00   30.74
   2  -2 -12  810.28   32.67
  -2   2 -12  846.65   33.25
   2   2 -12  818.04   33.16
   2   2 -13  404.84   21.90
   2  -2  13  437.84   14.16
   2   2  13  386.36   15.96
  -2  -2 -13  413.86   11.64
   2  -2 -13  399.22   15.84
  -2   2 -13  441.98   12.78
   2   2 -13  390.46   11.98
   2   2 -14  132.83   11.93
   2  -2 -14  154.15   12.30
   2  -2  14  140.07    9.84
   2   2  14  129.06    8.76
  -2  -2 -14  146.87   17.22
   2  -2 -14  132.82   14.23
  -2   2 -14  147.27   13.87
   2   2 -14  131.14   15.75
   2   2 -15  109.18    7.64
   2  -2 -15   91.61   20.39
   2  -2  15  109.36    9.61
   2   2  15   98.25   10.55
  -2  -2 -15  102.80   11.39
   2  -2 -15   94.64   14.97
  -2   2 -15  117.37   25.54
   2   2 -15   97.16    8.42
   2   2 -16  397.64   10.99
   2  -2 -16  351.74   11.67
   2   2  16  424.79   12.46
  -2  -2 -16  395.73   15.18
   2  -2 -16  383.57    8.61
  -2   2 -16  364.13   10.41
   2   2 -16  374.85   12.34
   2   2 -17   10.04    3.55
   2  -2 -17   12.88    5.54
   2  -2  17   11.30    2.77
   2   2  17    9.16    3.53
  -2  -2 -17   24.49    4.76
   2  -2 -17   14.66    4.59
  -2   2 -17   16.46    4.43
   2   2 -17   14.32    5.17
   2   2 -18   11.57    6.66
   2  -2 -18    8.58    3.89
   2  -2  18   16.30    6.63
   2   2  18   26.62    8.36
  -2  -2 -18   12.42    3.19
   2  -2 -18    5.35    3.25
  -2   2 -18    8.14    5.84
   2   2 -18   11.07    3.29
   2  -2 -19   -0.41    4.52
   2  -2  19    7.51    5.64
   2   2  19    0.94    7.64
   2  -2 -19    3.29    1.94
  -2   2 -19    7.60    6.22
   2   2 -19   -0.69    3.70
   2  -2  20    9.50    4.49
   2   2  20    7.30    4.41
  -2  -2  20    0.96    3.97
  -2  -2 -20    5.35    2.87
   2  -2 -20    6.05    3.67
  -2   2 -20    3.72    2.39
   2   2 -20   16.74    8.74
   2  -2  21    3.22    2.47
   2   2  21    9.50    3.03
  -2  -2  21    3.85    4.61
  -2   2  21    2.94    4.31
  -2  -2 -21    8.04    3.55
  -2   2 -21    5.32    5.01
   2   2 -21    5.70    3.35
   2  -2  22    6.83    5.79
  -2  -2  22    2.13    4.45
  -2  -2 -22   11.58    4.07
  -2   2 -22    4.26    5.02
   2   2 -22    4.90    2.56
   3   0   0    2.04    2.94
  -3   0   0    1.96    1.24
   0  -3   0    5.36    2.56
   3   0  -1  291.05    8.06
   3   0   1  290.39    4.80
  -3   0  -1  295.87    4.18
   0   3  -1  300.93    6.80
   0  -3   1  282.95    4.12
   0  -3  -1  291.87    5.75
   0  -3   2  585.78    8.84
   0  -3  -2  602.74    9.40
   3   0  -2  580.32   13.06
   3   0   2  589.96   12.45
   0  -3   2  561.08    8.49
   0  -3  -2  575.86    8.95
  -3   0  -2  590.83   10.79
   0   3  -2  620.32   10.80
   0  -3   2  550.40   10.90
   0  -3  -2  555.54    8.60
   0   3  -3  638.51   10.13
   0  -3  -3  616.95    9.24
   3   0  -3  590.40   11.21
   3   0   3  588.89    9.87
   0  -3  -3  593.15    9.44
  -3   0  -3  625.22   11.45
   0   3  -3  594.68   14.13
   3   0  -3  590.98    9.19
   0  -3   3  592.82   10.79
   0  -3  -3  601.18    9.09
   0   3  -4  822.67   13.22
   0  -3  -4  811.09   12.12
   3   0  -4  899.55   13.96
   3   0   4  839.47   12.99
   0  -3  -4  808.90   12.66
  -3   0  -4  780.43   12.19
   0   3  -4  795.04   12.50
   3   0  -4  795.83   13.06
   0  -3   4  806.12   11.95
   0  -3  -4  803.42   12.40
   0   3  -5 1775.44   25.86
   3   0  -5 2027.70   29.06
   3   0   5 1808.92   26.05
   0  -3  -5 1818.97   25.52
  -3   0  -5 1824.06   26.14
   0   3  -5 1794.37   25.99
   3   0  -5 1818.35   25.69
   0  -3  -5 1823.24   25.32
   0   3  -6  625.72   10.33
   0  -3  -6  654.62   12.40
   3   0  -6  648.86   11.48
   3   0   6  634.59   11.11
   0  -3  -6  639.83   10.14
  -3   0  -6  656.98   11.20
   0   3  -6  626.01   12.42
   3   0  -6  619.29    9.97
   0  -3  -6  645.28   10.24
   0   3  -7  904.37   14.96
   3   0  -7  896.42   18.54
   3   0   7  948.36   16.71
   0  -3  -7  913.54   15.37
  -3   0  -7  916.39   15.40
   3   0  -7  918.15   14.98
   0   3  -7  917.99   15.17
  -3   0   7  929.27   13.26
   0   3  -8   23.06    4.19
   0  -3  -8   14.89    3.78
   3   0  -8   20.81    4.61
   3   0   8   22.97    5.84
   0  -3  -8   24.23    4.31
  -3   0  -8   15.98    3.31
   3   0  -8   24.21    4.15
   0   3  -8   23.88    3.69
  -3   0   8   18.10    1.86
   0   3  -9  227.30   15.56
   0  -3  -9  236.96   14.19
   3   0  -9  221.61   16.33
   3   0   9  214.33   11.45
   0  -3  -9  231.51   13.64
  -3   0  -9  223.00   12.06
   3   0  -9  226.68   11.94
   0   3  -9  216.88   12.37
  -3   0   9  216.64   10.34
   0   3 -10  775.58   27.93
   0  -3 -10  753.83   24.82
   3   0 -10  773.59   23.80
   3   0  10  884.74   27.27
   0  -3 -10  755.51   20.17
  -3   0 -10  757.27   21.18
   3   0 -10  804.08   21.37
   0   3 -10  754.14   21.59
   0   3 -11  225.88   21.41
   0  -3 -11  218.46   19.19
   3   0 -11  264.02   21.66
   3   0  11  251.69   10.44
   0  -3 -11  205.36   17.21
  -3   0 -11  205.47   22.46
   3   0 -11  229.13    7.79
   0   3 -11  229.07   15.12
  -3   0 -11  212.70   17.16
   0   3 -12   45.82   10.32
   0  -3 -12   43.08    7.03
   3   0 -12   33.60    7.57
   3   0  12   55.68   14.65
   0  -3 -12   42.03    7.82
  -3   0 -12   45.40   10.07
   3   0 -12   38.96    7.05
   0   3 -12   41.97    7.31
   0  -3 -13    8.05    4.42
   3   0 -13    8.06    4.18
   3   0  13   16.35    5.89
   0  -3 -13   17.14    3.25
  -3   0 -13    7.67    3.30
   3   0 -13   14.20    4.92
   0   3 -13    6.98    3.88
   0  -3 -14  192.98   11.22
   3   0 -14  207.35   12.08
   3   0  14  185.80   15.83
   0  -3  14  166.72   14.22
   0  -3 -14  184.04   10.12
  -3   0 -14  194.07   18.22
   3   0 -14  189.56   11.04
   0   3 -14  167.93   13.60
   0  -3 -15    2.98    3.51
   3   0 -15    4.29    3.09
   3   0  15    6.14    4.52
   0  -3 -15    6.92    2.59
  -3   0 -15   -0.58    4.94
   3   0 -15   14.13    6.54
   3   0 -16   48.73    6.31
   3   0  16   38.44    8.19
   0  -3  16   42.54    9.76
   0  -3 -16   30.62    6.23
  -3   0 -16   37.91   10.78
   3   0 -16   32.09    7.66
   0   3 -16   44.87    9.59
   3   0 -17   21.12    5.42
   3   0  17   37.20    6.73
   0  -3  17   29.87   14.27
   0   3  17   26.38    7.11
   0  -3 -17   32.46    5.83
  -3   0 -17   25.97    6.21
   3   0 -17   15.55    8.37
   0   3 -17   20.68    6.90
   3   0 -18  253.29   23.43
   3   0  18  275.28   19.75
   0  -3  18  265.82   34.48
   0   3  18  258.05   26.07
   0  -3 -18  261.44   21.70
  -3   0 -18  258.85   29.90
   3   0 -18  347.89   12.25
   0   3 -18  255.94   22.18
   3   0 -19   65.47   10.59
   3   0  19   47.40   16.98
   0  -3  19   56.41   12.15
   0   3  19   41.07   13.71
   0  -3 -19   56.84    6.39
  -3   0 -19   43.25   11.51
   3   0 -19   36.60   10.56
   0   3 -19   50.89   11.65
   3   0 -20   10.93    4.35
   3   0  20    3.68    3.06
   0  -3  20   -1.57    4.61
   0   3  20    4.96    4.36
   0  -3 -20   -0.84    3.02
  -3   0 -20    7.50    3.57
   3   0 -20   -1.36    3.27
   0   3 -20    8.56    3.89
   3   0  21   31.22   10.02
   0  -3  21   59.22   27.11
   0   3  21   28.96    7.00
  -3   0 -21   39.86    7.00
   3   0 -21   16.81    9.93
   0   3 -21   25.59    7.08
   0  -3  22    5.40    4.91
   0   3  22    1.83    3.62
   0  -3 -22    5.44    2.73
  -3   0 -22    0.78    2.98
   0   3 -22    8.38    5.66
   1   3   0 1378.62   18.63
   3  -1   0 1399.15   20.43
   3   1   0 1409.68   22.09
  -1   3   0 1433.30   19.72
  -1  -3   0 1443.31   19.50
  -3   1   0 1427.40   19.62
   3  -1   0 1437.58   19.73
  -1   3   0 1416.90   20.35
  -1  -3   0 1408.99   20.25
   1   3   1  529.93    7.95
   1  -3  -1  540.92    9.81
  -1  -3   1  561.59    8.35
   3   1  -1  544.83    9.81
   3  -1   1  532.14    9.89
   3   1   1  647.99   12.75
   1  -3   1  603.39    9.39
   1   3   1  528.26    7.68
  -3   1  -1  623.96   10.19
  -1   3  -1  561.46   10.05
  -1  -3   1  533.51    8.68
  -1  -3  -1  640.71   10.32
   1   3  -2 2226.98   30.31
   1  -3  -2 2179.20   30.08
  -1  -3   2 2216.60   30.24
   3   1  -2 2163.13   30.19
   3  -1  -2 2183.18   30.71
   3  -1   2 2097.65   29.39
   3   1   2 2060.15   28.75
   1  -3   2 2127.66   29.24
   1   3   2 2209.75   30.27
  -1  -3  -2 2146.36   30.00
  -1   3   2 2082.97   28.27
  -3  -1  -2 2255.44   31.58
  -3   1  -2 2132.93   29.39
  -1   3  -2 2301.93   32.40
   1   3  -2 2141.52   31.38
  -1  -3   2 2131.07   29.52
  -1  -3  -2 2007.08   27.86
   1   3  -3  790.97   12.07
   1  -3  -3  777.48   12.22
   3   1  -3  756.99   12.61
   3  -1  -3  817.58   13.18
   3  -1   3  746.32   11.80
   3   1   3  788.17   12.04
   1  -3   3  794.18   12.98
  -1  -3  -3  785.66   11.87
   1  -3  -3  743.42   11.04
  -3  -1  -3  761.46   11.67
  -3   1  -3  776.32   12.44
  -1   3  -3  736.81   12.50
   3  -1  -3  774.09   12.21
   1   3  -3  776.36   12.22
   3   1  -3  741.77   13.74
  -1  -3   3  774.83   12.00
  -1  -3  -3  764.49   11.50
  -1  -3  -4  566.29   11.07
   1   3  -4  546.32    8.72
   1  -3  -4  561.40   10.12
   3   1  -4  547.65    9.13
   3  -1  -4  539.40   10.95
   3  -1   4  547.44    9.70
   3   1   4  533.18   11.67
   1  -3   4  563.07   10.96
  -1  -3  -4  564.88    9.32
   1  -3  -4  574.12    8.74
  -3  -1  -4  562.59    9.03
  -3   1  -4  560.21    9.31
  -1   3  -4  564.40   11.24
   3  -1  -4  543.98    8.89
   1   3  -4  536.49    9.46
  -1  -3   4  588.02    9.89
  -1  -3  -4  533.24    8.30
  -3  -1   4  537.98    8.62
  -1  -3  -5 1343.55   19.87
   1   3  -5 1241.52   19.04
   1  -3  -5 1435.41   21.58
   3   1  -5 1411.76   21.37
   3  -1  -5 1384.27   20.59
   3  -1   5 1413.58   21.80
   3   1   5 1298.17   19.45
   1  -3   5 1277.19   18.80
  -1  -3  -5 1290.61   19.42
   1  -3  -5 1426.19   21.16
  -3  -1  -5 1410.70   22.50
   3  -1  -5 1295.21   18.54
  -1   3  -5 1435.27   21.20
   1   3  -5 1327.64   21.19
   3   1  -5 1400.85   20.65
  -1  -3   5 1426.44   20.39
  -1  -3  -5 1296.50   18.81
  -3  -1   5 1365.22   19.73
  -1  -3  -6 1481.64   21.63
   1   3  -6 1505.88   23.81
   1  -3  -6 1383.73   21.30
   3   1  -6 1366.06   23.06
   3  -1  -6 1426.14   24.98
   3  -1   6 1442.57   22.78
   3   1   6 1450.36   22.40
   1  -3   6 1467.71   21.54
  -1  -3  -6 1503.89   23.43
   1  -3  -6 1377.98   20.06
  -3  -1  -6 1410.97   22.33
  -3   1  -6 1440.15   22.21
   3  -1  -6 1473.15   21.01
  -1   3  -6 1445.53   22.03
   3   1  -6 1420.81   20.94
  -1  -3   6 1374.26   20.54
  -1  -3  -6 1434.15   20.36
  -3  -1   6 1430.71   20.00
  -1  -3  -7  155.10    8.67
   1   3  -7  147.11   11.06
   1  -3  -7  121.13    7.87
   3   1  -7  100.71    6.92
   3  -1  -7  154.26    8.76
   3  -1   7  106.80    7.71
   3   1   7  148.87    8.06
   1  -3   7  150.55    8.64
  -1  -3  -7  144.47   10.34
  -3  -1  -7  106.23    8.86
   1  -3  -7  105.36    7.52
  -3   1  -7  179.72   10.04
   3  -1  -7  142.10    8.74
  -1   3  -7  103.21    6.60
   1   3  -7  165.14    9.58
   3   1  -7  106.87    6.91
  -1  -3   7  102.72    6.32
  -1  -3  -7  151.53    7.83
  -3  -1   7  149.08    7.50
  -1  -3  -8   62.47    9.43
   1   3  -8   73.17   11.60
   1  -3  -8   27.10    7.70
   3   1  -8   29.01    6.30
   3  -1  -8   60.09   13.34
   3  -1   8   41.31    7.16
   3   1   8   52.27    4.35
   1  -3   8   61.88    5.02
  -1  -3  -8   54.73    6.63
  -3  -1  -8   38.34    5.81
   1  -3  -8   34.75    3.77
  -3   1  -8   63.06    7.16
   3  -1  -8   50.68    6.92
  -1   3  -8   38.89    9.72
   3   1  -8   32.85    5.53
   1   3  -8   62.50    7.14
  -1  -3  -8   53.39    3.94
  -3  -1   8   54.53    4.30
  -3  -1  -8   31.63    5.11
  -1  -3  -9   19.61    3.29
   1   3  -9   13.59    3.12
   1  -3  -9   23.05    6.57
   3   1  -9   16.37    5.93
   3  -1  -9   17.21    5.38
   3  -1   9   25.66    5.74
   3   1   9   16.83    8.96
   1  -3   9   16.38    4.28
  -1  -3  -9   11.04    4.31
  -3  -1  -9   23.52    4.47
   1  -3  -9   23.86    3.81
  -3   1  -9   17.37    3.70
   3  -1  -9   22.09    4.13
  -1   3  -9   20.55    4.60
   3   1  -9   24.48    4.24
   1   3  -9   19.49    4.48
  -3   1   9   13.35    1.91
  -3  -1   9   12.29    1.88
  -3   1   9   16.48    2.07
  -1   3   9   13.56    2.02
  -3  -1  -9   25.45    3.50
  -1  -3 -10  472.66   16.55
   1   3 -10  438.51   14.94
   1  -3 -10  456.63   14.37
   3   1 -10  429.87   14.60
   3  -1 -10  474.53   15.25
   3  -1  10  453.33   13.96
   1  -3  10  469.83   14.00
  -1  -3 -10  458.84   12.73
  -3  -1 -10  481.15   15.25
   1  -3 -10  455.59   14.40
  -3   1 -10  547.21   16.72
   3  -1 -10  469.62   14.22
  -1   3 -10  451.91   15.00
   3   1 -10  474.74   17.00
   1   3 -10  452.82   20.00
  -3  -1 -10  486.13   12.73
  -1  -3 -11  762.06   16.62
   1   3 -11  747.26   14.63
   3   1 -11  746.55   21.84
   3  -1 -11  717.82   17.72
   3  -1  11  734.35   17.20
   1  -3  11  732.16   17.49
  -1  -3 -11  729.76   22.01
  -3  -1 -11  727.49   15.02
   1  -3 -11  765.68   15.53
  -3   1 -11  722.37   14.44
   3  -1 -11  739.38   12.90
  -1   3 -11  746.24   20.57
   3   1 -11  758.66   17.18
   1   3 -11  735.92   21.43
  -1  -3 -12  368.45   17.75
   1   3 -12  381.92   16.19
   1  -3 -12  319.82   15.11
   3   1 -12  321.91   14.96
   3  -1 -12  374.48   16.93
   3  -1  12  343.69   15.48
   1  -3  12  373.95   17.33
  -1  -3 -12  376.04   16.42
  -3  -1 -12  350.49   15.11
   1  -3 -12  331.61   15.71
  -3   1 -12  348.02   20.17
   3  -1 -12  357.88   15.12
  -1   3 -12  327.04   16.89
   3   1 -12  332.37   14.58
   1   3 -12  346.20   17.55
   1   3 -13   17.16    3.64
   1  -3 -13   29.35    5.70
   3   1 -13   25.46    6.19
   3  -1 -13   20.32    4.97
   3  -1  13   35.91    5.24
   3   1  13   28.90    7.79
   1  -3  13   12.08    3.49
  -1  -3 -13   16.15    4.84
  -3  -1 -13   30.44    7.99
   1  -3 -13   29.54    4.81
  -3   1 -13   11.75    5.12
   3  -1 -13   16.81    4.71
  -1   3 -13   18.65    4.28
   3   1 -13   26.51    7.12
   1   3 -13    7.24    4.57
   1   3 -14   34.63    6.15
   1  -3 -14   37.72    9.96
   3   1 -14   41.08    6.43
   3  -1 -14   41.69    9.53
   3  -1  14   32.44    6.94
   3   1  14   46.52   10.85
   1  -3  14   33.91    6.31
   1   3  14   35.78    7.19
  -1  -3 -14   35.34    7.69
  -3  -1 -14   42.19    6.89
   1  -3 -14   31.92    8.49
  -3   1 -14   34.11   11.25
   3  -1 -14   32.63    6.31
  -1   3 -14   41.80    7.97
   3   1 -14   28.89    7.28
   1   3 -14   27.90    7.85
   1   3 -15  157.50   14.55
   1  -3 -15  169.21   16.28
   3   1 -15  155.19   13.86
   3  -1 -15  171.98   13.33
   3  -1  15  163.02   14.03
   3   1  15  145.50    9.78
   1  -3  15  153.48    8.36
   1   3  15  172.37   10.57
  -1  -3 -15  139.42   17.28
  -3  -1 -15  151.10    8.44
   1  -3 -15  162.66   10.64
  -3   1 -15  145.19   16.76
   3  -1 -15  131.80   19.67
  -1   3 -15  136.12   25.90
   3   1 -15  171.67   13.77
   1   3 -15  142.25   14.44
   1   3 -16   64.14   12.79
   1  -3 -16   68.28   14.75
   3   1 -16   95.98   13.42
   3  -1 -16   75.72   13.06
   3  -1  16   91.11   10.44
   3   1  16   85.16   14.67
   1  -3  16   79.02   15.79
   1   3  16   69.65   18.19
  -1  -3 -16   61.18    9.99
  -3  -1 -16   82.52   15.39
   1  -3 -16   71.53   12.92
  -3   1 -16   71.89   13.60
   3  -1 -16   69.24   11.07
  -1   3 -16   77.75   19.50
   3   1 -16   77.56   14.84
   1   3 -16   57.13   10.40
   1  -3 -17  122.94   17.28
   3   1 -17  136.44   14.97
   3  -1 -17  128.10   21.10
   3  -1  17  126.95   31.40
   3   1  17  140.86   14.07
   1  -3  17  130.96   16.80
   1   3  17  120.54   27.45
  -1  -3  17  142.45   23.86
  -1  -3 -17  132.73   20.48
  -3  -1 -17  129.87   19.11
   1  -3 -17  131.95   20.32
  -3   1 -17  132.87   20.26
   3  -1 -17  121.47   15.30
  -1   3 -17  134.34   19.21
   3   1 -17  156.32   15.23
   1   3 -17  125.68   18.13
   3   1 -18   49.43   11.37
   3  -1 -18   50.43    8.90
   3  -1  18   35.42    7.60
   3   1  18   46.67   11.87
   1  -3  18   53.32   12.61
   1   3  18   40.45   12.55
  -1  -3  18   33.81   10.50
  -1  -3 -18   48.29    8.99
   1  -3 -18   46.20   10.53
  -3  -1 -18   35.16    6.70
  -3   1 -18   39.70   10.28
   3  -1 -18   39.48    9.99
  -1   3 -18   33.49   11.82
   3   1 -18   47.12    8.49
   1   3 -18   32.66    8.65
   3   1 -19   -1.57    4.94
   3  -1 -19    7.15    4.96
   3  -1  19    4.21    4.73
   3   1  19    3.50    3.25
   1  -3  19    4.60    2.85
   1   3  19    2.60    4.50
  -1  -3  19    0.55    3.64
  -1   3  19    5.88    3.35
  -1  -3 -19    2.01    1.53
   1  -3 -19    2.46    1.42
  -3  -1 -19    0.74    2.34
  -3   1 -19    1.94    4.81
   3  -1 -19    0.26    3.87
  -1   3 -19    4.23    2.52
   3   1 -19    3.50    3.73
   1   3 -19    2.18    4.29
   3   1 -20    8.64    4.83
   3  -1  20   12.22    7.13
   3   1  20    9.71    3.56
   1  -3  20   28.26   10.10
   1   3  20    9.64    3.58
  -1  -3  20   16.84    7.04
  -1   3  20   13.91    7.42
  -1  -3 -20   22.49    5.28
   1  -3 -20   14.14    5.06
  -3  -1 -20   19.96    5.31
  -3   1 -20    9.87    5.14
   3  -1 -20   16.18    6.03
  -1   3 -20   15.22    6.80
   3   1 -20    6.86    2.83
   1   3 -20   27.23    8.08
   3  -1 -21   13.70    7.53
   3  -1  21   27.48    7.57
   3   1  21   27.91    9.18
   1  -3  21   30.54   11.86
   1   3  21   19.17   10.55
  -1  -3  21   26.10    6.26
  -1   3  21   18.53    7.90
  -1  -3 -21   34.36    7.23
  -3  -1 -21   24.09    9.94
  -3   1 -21   33.22    8.12
  -1   3 -21   29.10    8.83
   3   1 -21   32.56    7.49
   1   3 -21   11.25    3.62
   1  -3  22   31.67   10.15
  -1  -3  22   41.69   13.25
  -1   3  22   27.82    9.15
  -1  -3 -22   38.72    8.32
  -3  -1 -22   55.60   13.43
  -3   1 -22   56.52   13.41
  -1   3 -22   28.30   13.31
   3   1 -22   40.31   10.04
   1   3 -22   34.69   14.53
   2  -3   0  100.84    3.61
   2   3   0  107.30    4.22
   3  -2   0  101.57    3.38
   3   2   0  104.53    6.72
  -2  -3   0  109.16    1.92
  -3   2   0  108.71    3.49
   3  -2   0  106.08    2.21
  -2   3   0  109.72    4.03
   2  -3   0  100.43    2.43
  -2  -3   0  111.39    5.30
  -3  -2   0  103.93    5.13
   3  -2  -1 4611.21   62.67
   3  -2   1 5009.99  236.34
   3   2   1 4685.58   63.48
  -3  -2  -1 4918.53  232.02
  -2   3  -1 5121.93  241.53
  -2  -3   1 5234.67  246.95
  -2  -3  -1 4667.26   63.53
  -3  -2   1 4792.77   65.13
  -3  -2  -1 4878.17   66.50
   2   3  -2 1568.42   22.09
   2  -3  -2 1643.60   22.94
   3   2  -2 1697.99   23.87
   3  -2  -2 1623.23   22.95
   3  -2   2 1588.73   23.47
   2  -3   2 1578.91   22.05
   3   2   2 1598.39   22.44
   2   3   2 1611.75   22.29
  -2  -3  -2 1538.06   21.92
  -3  -2  -2 1580.62   23.74
  -2   3   2 1596.09   21.57
  -3   2  -2 1552.58   21.82
  -2   3  -2 1567.34   23.02
   2   3  -2 1557.93   23.62
  -2  -3   2 1600.64   22.90
  -2  -3  -2 1628.81   23.44
  -3  -2   2 1625.41   23.79
  -3  -2  -2 1587.57   22.42
   2   3  -3  835.98   13.82
   2  -3  -3  927.96   13.78
   3   2  -3  904.16   13.74
   3  -2  -3  806.78   12.32
   3  -2   3  879.13   13.66
   3   2   3  826.45   12.90
   2  -3   3  827.08   14.02
   2   3   3  906.05   14.19
  -2  -3  -3  825.88   14.33
  -2   3   3  811.77   11.27
  -3   2  -3  839.37   13.93
  -2   3  -3  897.79   13.65
   2   3  -3  835.75   13.43
   3   2  -3  889.58   13.74
  -3   2   3  890.56   12.36
  -2  -3   3  892.82   14.14
  -2  -3  -3  832.61   13.17
  -3  -2   3  810.00   12.36
  -3  -2  -3  949.39   14.17
   2   3  -4 2672.69   36.82
   2  -3  -4 2437.92   35.05
   3   2  -4 2463.16   34.59
   3  -2  -4 2633.77   37.07
   3  -2   4 2533.62   35.52
   3   2   4 2616.50   36.49
   2  -3   4 2696.75   37.62
   2   3   4 2669.84   37.06
  -2  -3  -4 2475.19   34.77
  -3  -2  -4 2561.02   35.93
   2  -3  -4 2533.33   34.54
  -3   2  -4 2629.16   36.97
  -2   3  -4 2583.72   36.29
   2   3  -4 2715.63   39.03
   3   2  -4 2522.42   35.25
  -2  -3   4 2562.76   35.75
  -2  -3  -4 2618.13   36.13
  -3  -2   4 2590.36   35.94
  -3  -2  -4 2543.37   35.38
   2   3  -5  826.38   13.96
   2  -3  -5  757.09   13.64
   3   2  -5  748.94   12.29
   3  -2   5  780.05   12.53
   3   2   5  774.31   12.24
   2  -3   5  781.75   12.22
   2   3   5  763.09   13.46
  -2  -3  -5  810.52   14.56
  -3  -2  -5  795.56   14.85
   2  -3  -5  771.44   11.57
  -3   2  -5  795.13   12.72
   3  -2  -5  810.77   11.77
  -2   3  -5  739.18   12.46
   2   3  -5  773.61   15.12
   3   2  -5  761.82   12.34
  -2  -3   5  785.52   12.24
  -2  -3  -5  793.91   11.96
  -3  -2   5  777.11   12.10
  -3  -2  -5  769.52   11.83
   2   3  -6  671.35   11.16
   2  -3  -6  686.71   11.48
   3   2  -6  705.88   12.48
   3  -2  -6  689.07   11.57
   3  -2   6  693.20   12.49
   3   2   6  685.63   12.09
   2  -3   6  682.60   11.57
   2   3   6  694.65   13.74
  -2  -3  -6  689.63   13.10
  -3  -2  -6  711.61   13.77
   2  -3  -6  708.77   10.90
  -3   2  -6  687.27   11.99
   3  -2  -6  684.27   10.55
  -2   3  -6  688.05   12.75
   2   3  -6  693.29   13.92
   3   2  -6  679.35   14.63
  -2  -3   6  700.00   11.45
  -2  -3  -6  700.32   10.85
  -3  -2   6  696.74   11.36
  -3  -2  -6  714.28   11.27
   2   3  -7  420.97    5.39
   2  -3  -7  421.03    8.62
   3   2  -7  417.23    7.93
   3  -2  -7  399.82   19.66
   3  -2   7  408.79   20.26
   3   2   7  411.12   22.36
   2  -3   7  424.26    8.56
   2   3   7  419.43    6.02
  -2  -3  -7  414.93    7.12
  -3  -2  -7  399.25   19.59
   2  -3  -7  412.09   20.05
  -3   2  -7  419.86    6.58
   3  -2  -7  405.32   20.09
  -2   3  -7  413.81   21.58
   2   3  -7  416.32    9.87
   3   2  -7  425.85    6.74
  -2  -3   7  408.66   19.79
  -3  -2   7  410.18   19.76
  -2  -3  -7  418.17    4.28
  -3  -2  -7  431.26    5.33
   2   3  -8 1394.63   32.64
   2  -3  -8 1398.13   30.84
   3   2  -8 1432.46   32.80
   3  -2  -8 1344.09   30.02
   3  -2   8 1501.21   36.21
   3   2   8 1526.97   33.70
   2  -3   8 1618.40   36.11
   2   3   8 1406.29   30.89
  -2  -3  -8 1434.42   32.42
  -3  -2  -8 1378.98   32.29
   2  -3  -8 1439.85   30.52
  -3   2  -8 1406.61   34.13
   3  -2  -8 1390.18   29.61
  -2   3  -8 1413.19   31.83
   2   3  -8 1464.33   32.82
   3   2  -8 1496.89   34.05
  -2  -3   8 1415.11   30.32
  -3  -2   8 1433.30   30.30
  -2  -3  -8 1380.00   29.39
  -3  -2  -8 1442.39   30.87
   2   3  -9  339.95   11.01
   2  -3  -9  297.72   11.86
   3   2  -9  309.35   10.81
   3  -2  -9  335.30   11.56
   3  -2   9  304.57   10.44
   2  -3   9  352.38   12.30
   2   3   9  315.62   11.81
  -2  -3  -9  342.33   10.70
  -3  -2  -9  293.92    9.90
   2  -3  -9  301.55    9.80
  -3   2  -9  333.08   10.58
   3  -2  -9  347.28    9.78
   2   3  -9  352.87   15.36
   3   2  -9  330.24   12.58
  -2  -3   9  312.53   10.10
  -3  -2   9  325.79    9.16
  -2  -3  -9  338.08   10.20
  -3  -2  -9  308.72    9.56
   2   3 -10    8.48    4.56
   2  -3 -10   10.18    6.31
   3   2 -10   13.83    4.17
   3  -2 -10    7.14    3.13
   3  -2  10   10.68    5.46
   3   2  10    9.57    3.71
   2  -3  10   11.50    3.91
   2   3  10    9.06    4.50
  -2  -3 -10   10.29    3.83
  -3  -2 -10    7.69    3.62
   2  -3 -10    7.51    2.39
  -3   2 -10    9.13    5.71
   3  -2 -10    3.00    2.52
  -2   3 -10    9.10    5.70
   2   3 -10   14.21    5.43
   3   2 -10   10.82    4.67
  -3  -2  10    9.26    1.68
  -2  -3 -10   10.69    1.91
  -3  -2 -10    8.32    1.81
  -2   3  10    6.99    1.10
   2   3 -11  473.85   93.36
   2  -3 -11   60.10   11.46
   3   2 -11   72.17   13.42
   3  -2 -11   71.98   16.11
   3  -2  11   62.97   13.65
   3   2  11   88.63   10.94
   2  -3  11   70.61    9.38
   2   3  11   51.87   12.28
  -2  -3 -11   75.63   19.06
  -3  -2 -11   56.93   12.78
   2  -3 -11   65.49   10.89
  -3   2 -11   67.03    8.20
   3  -2 -11   74.52   13.24
  -2   3 -11   55.85    7.69
   2   3 -11   81.25   15.86
   3   2 -11   62.12   13.89
   2   3 -12  441.59   19.33
   2  -3 -12  405.66   17.56
   3   2 -12  402.10   17.43
   3  -2 -12  434.09   19.93
   3  -2  12  386.85   18.32
   3   2  12  523.39   24.95
   2  -3  12  424.17   20.24
   2   3  12  370.75   18.23
  -2  -3 -12  417.61   19.63
  -3  -2 -12  412.02   18.69
   2  -3 -12  396.85   16.98
   3  -2 -12  441.74   18.98
  -3   2 -12  451.59   20.27
  -2   3 -12  396.76   22.67
   3   2 -12  406.29   17.65
   2   3 -12  441.02   22.84
   2   3 -13  103.91    9.11
   3   2 -13  125.92   10.79
   3  -2 -13   96.38   11.08
   3  -2  13  122.63    9.64
   3   2  13  227.02   20.93
   2  -3  13   99.11    9.95
   2   3  13  124.15   11.73
  -2  -3 -13  101.19    9.29
  -3  -2 -13  116.41    6.55
   2  -3 -13  123.47   13.43
   3  -2 -13  128.78   16.52
  -3   2 -13  122.83   22.16
  -2   3 -13  129.63   12.66
   3   2 -13  126.37   15.70
   2   3 -13  103.91   11.03
   2   3 -14   12.73    5.31
   2  -3 -14    5.61    3.57
   3   2 -14   21.81    7.19
   3  -2 -14    3.58    1.59
   3  -2  14   26.34    8.27
   3   2  14    9.08    3.34
   2  -3  14   13.61    4.88
   2   3  14    6.86    6.63
  -2  -3 -14   15.42    3.74
  -3  -2 -14    3.89    3.33
   2  -3 -14   13.51    4.08
   3  -2 -14    7.20    3.13
  -3   2 -14   13.89    5.37
  -2   3 -14   13.42    6.01
   3   2 -14   17.90    7.28
   2   3 -14   10.39    4.21
   2   3 -15  185.01   16.68
   2  -3 -15  214.59    8.77
   3   2 -15  189.87   17.15
   3  -2 -15  236.19   28.91
   3  -2  15  206.13   11.49
   3   2  15  190.23   13.05
   2  -3  15  213.27    9.75
   2   3  15  170.09   11.70
  -2  -3 -15  188.47    8.61
  -3  -2 -15  201.99   20.84
   2  -3 -15  200.62    7.88
   3  -2 -15  174.78   13.73
  -3   2 -15  170.82   12.04
  -2   3 -15  205.01   10.86
   3   2 -15  213.61   12.50
   2   3 -15  163.85   17.06
   2   3 -16  126.19   21.60
   2  -3 -16   97.65   16.50
   3   2 -16  131.67   20.25
   3  -2 -16  118.69   12.38
   3  -2  16  106.77   22.92
   3   2  16  115.57   13.79
   2  -3  16  102.00    8.45
   2   3  16  105.56    8.40
  -2  -3 -16  126.58   17.49
  -3  -2 -16  113.74    8.51
   2  -3 -16   89.16   16.75
   3  -2 -16  113.89   15.62
  -3   2 -16  114.74   19.70
  -2   3 -16  104.65   18.47
   3   2 -16  111.13    7.30
   2   3 -16  111.49   11.27
   2   3 -17   35.95    8.18
   2  -3 -17   40.42    7.01
   3   2 -17   35.00    7.04
   3  -2 -17   40.82    7.53
   3  -2  17   42.33    8.78
   3   2  17   41.52   10.44
   2  -3  17   35.72    7.85
   2   3  17   25.77    6.93
  -2  -3 -17   38.18    6.58
  -3  -2 -17   45.78    7.47
   2  -3 -17   37.10    8.67
   3  -2 -17   29.24    5.32
  -3   2 -17   45.09    8.58
  -2   3 -17   47.23   11.76
   3   2 -17   34.22    8.76
   2   3 -17   41.09    6.36
   2   3 -18    7.13    4.48
   2  -3 -18    4.23    2.59
   3   2 -18    4.56    3.90
   3  -2 -18    4.75    4.81
   3  -2  18    4.01    4.06
   3   2  18    5.02    4.60
   2  -3  18    3.10    4.98
   2   3  18   14.67    9.02
  -2  -3 -18   -1.05    3.41
  -3  -2 -18   11.84    4.26
   2  -3 -18    4.30    2.84
   3  -2 -18    1.19    2.88
  -3   2 -18    4.91    4.73
  -2   3 -18    2.64    3.73
   3   2 -18    2.20    3.13
   2   3 -18    6.63    4.88
   2  -3 -19    7.63    4.60
   3   2 -19    3.28    3.92
   3  -2 -19    6.98    4.54
   3  -2  19   21.35    6.59
   3   2  19    2.15    2.82
   2  -3  19    3.75    3.51
   2   3  19    1.30    4.15
  -2  -3  19    6.28    2.61
  -2  -3 -19    6.43    2.12
  -3  -2 -19    9.05    3.30
   2  -3 -19    4.61    2.06
   3  -2 -19    2.78    2.85
  -3   2 -19    4.27    5.14
  -2   3 -19    5.14    3.66
   3   2 -19    7.64    3.93
   2   3 -19    1.73    3.59
   3   2 -20   88.93   23.77
   3  -2 -20   77.46   19.57
   3  -2  20   94.93   22.35
   3   2  20   97.25   11.93
   2  -3  20  106.96   10.37
   2   3  20   89.70   16.11
  -2  -3  20   86.07   23.84
  -2  -3 -20  104.29   21.08
  -3  -2 -20  122.32   15.86
  -3   2 -20   79.23   21.28
  -2   3 -20  124.26   11.86
   3   2 -20  103.54   14.35
   2   3 -20   83.04   19.94
   3  -2 -21    8.93    3.32
   3  -2  21    7.61    5.22
   3   2  21    7.05    4.66
   2  -3  21    6.44    3.44
   2   3  21   12.20    8.70
  -2  -3  21   11.88    5.59
  -2   3  21   17.16    5.96
  -3  -2  21   11.01    4.65
  -2  -3 -21   14.37    5.61
  -3  -2 -21    7.33    6.62
  -3   2 -21    9.57    4.59
   3   2 -21    9.70    5.26
   2   3 -21   40.91   19.87
   2  -3  22    3.64    5.55
  -2  -3  22    3.65    4.78
  -2   3  22    6.87    4.87
  -2  -3 -22   -0.54    3.26
  -3  -2 -22    9.55    4.23
  -3   2 -22    3.58    2.55
  -2   3 -22    5.17    2.24
   3   2 -22    4.78    2.88
   2   3 -22    2.79    2.28
   3   3  -1  712.99   11.73
   3  -3  -1  696.69   10.80
   3  -3   1  711.71   11.44
   3   3   1  720.61   11.23
  -3   3   1  745.62   10.27
  -3   3  -1  720.68   11.79
   3  -3  -1  731.82   10.11
  -3  -3   1  693.72   10.88
  -3  -3  -1  702.46   11.08
   3   3  -2  194.60    3.12
   3  -3  -2  188.65    3.98
   3  -3   2  192.52    4.26
   3   3   2  196.50    3.89
  -3  -3  -2  187.51    3.87
  -3   3  -2  193.94    6.14
  -3  -3   2  194.28    4.02
  -3  -3  -2  189.07    3.70
   3   3  -3   46.99    3.96
   3  -3  -3   41.54    3.11
   3  -3   3   48.70    7.38
   3   3   3   44.42    6.02
   3  -3  -3   52.57    1.25
  -3  -3  -3   42.18    3.93
  -3   3  -3   45.48    5.37
  -3   3   3   39.67    1.50
   3   3  -3   46.63    8.73
  -3  -3   3   40.78    3.41
  -3  -3  -3   54.26    9.24
   3   3  -4  164.00    3.86
   3  -3  -4  170.36    4.49
   3  -3   4  169.43    7.90
   3   3   4  153.93    6.16
  -3  -3  -4  152.14    4.05
  -3   3  -4  156.04   11.19
  -3   3   4  157.11    2.29
   3   3  -4  163.71   10.63
  -3  -3   4  152.07    3.56
  -3  -3  -4  163.83    4.71
   3   3  -5 2002.28   29.18
   3  -3   5 2014.76   29.03
   3   3   5 2001.05   28.46
  -3  -3  -5 2085.43   30.73
   3  -3  -5 2032.61   27.91
  -3   3  -5 2066.49   31.24
  -3  -3   5 2033.12   29.67
  -3  -3  -5 2023.83   28.49
   3   3  -6   95.05    7.84
   3  -3  -6  104.58    3.87
   3  -3   6  107.56    4.12
   3   3   6   99.09    4.44
  -3  -3  -6  104.38    3.85
   3  -3  -6  106.42    3.79
  -3   3  -6  105.51    6.54
   3   3  -6  107.16    5.20
  -3  -3   6  102.30    4.78
  -3  -3  -6  106.01    3.67
   3   3  -7 1493.52   34.30
   3  -3  -7 1395.83   30.93
   3  -3   7 1458.87   32.54
   3   3   7 1472.41   32.42
  -3  -3  -7 1462.78   32.10
   3  -3  -7 1485.35   31.80
  -3   3  -7 1397.72   31.16
   3   3  -7 1493.54   34.23
  -3  -3   7 1512.90   32.32
  -3  -3  -7 1417.30   29.89
   3   3  -8  215.26   14.89
   3  -3  -8  232.57   12.55
   3  -3   8  207.08   11.18
   3   3   8  219.19   11.76
  -3  -3  -8  217.55   11.63
   3  -3  -8  219.90   11.01
  -3   3  -8  216.92   12.17
   3   3  -8  227.76   13.41
  -3  -3   8  222.59   12.03
  -3  -3  -8  222.39   11.83
   3   3  -9  267.05    9.12
   3  -3  -9  269.79    9.71
   3  -3   9  261.84    9.45
  -3  -3  -9  289.72    9.90
   3  -3  -9  280.10    8.19
  -3   3  -9  284.60   12.59
   3   3  -9  301.54   11.96
  -3  -3   9  269.62    8.38
  -3  -3  -9  273.69    8.76
   3   3 -10   80.57    5.62
   3  -3 -10   83.17    7.30
   3  -3  10   84.11    5.52
   3   3  10   95.54   12.99
  -3  -3 -10   73.85    7.33
   3  -3 -10   91.55    6.64
  -3   3 -10   91.62   12.81
   3   3 -10   96.37   19.82
  -3  -3  10   78.59    3.43
  -3  -3 -10   72.76    4.40
   3   3 -11  140.00   15.29
   3  -3 -11  121.04   13.41
   3  -3  11  142.14   15.01
   3   3  11  158.19   16.09
  -3  -3 -11  136.68   16.80
   3  -3 -11  144.64   16.79
  -3   3 -11  152.76   20.58
   3   3 -11  143.58   22.76
  -3  -3 -11  140.98   12.65
   3   3 -12  614.21   26.35
   3  -3 -12  573.98   25.57
   3  -3  12  597.25   25.14
   3   3  12  652.53   29.67
  -3  -3 -12  540.31   23.79
   3  -3 -12  592.35   24.24
  -3   3 -12  582.47   24.27
   3   3 -12  569.20   26.74
   3   3 -13   16.80    3.44
   3  -3 -13   16.91    5.94
   3  -3  13   15.86    5.30
   3   3  13   11.56   10.75
  -3  -3 -13   15.46    4.51
   3  -3 -13   11.81    3.82
  -3   3 -13    8.28    4.54
   3   3 -13   18.06    4.73
   3   3 -14    6.47    2.38
   3  -3 -14    3.92    5.49
   3  -3  14    2.08    2.60
   3   3  14   -1.65    5.11
  -3  -3 -14    4.80    1.84
   3  -3 -14    4.18    2.50
  -3   3 -14    0.14    3.37
   3   3 -14    4.58    3.79
   3   3 -15   15.95    4.91
   3  -3 -15   24.68    6.37
   3  -3  15   23.72    5.00
   3   3  15   27.69    6.71
  -3  -3 -15   17.06    5.79
   3  -3 -15   14.00    4.80
  -3   3 -15   14.98    5.07
   3   3 -15   12.93    4.47
   3   3 -16  136.25   20.58
   3  -3 -16  129.93   20.94
   3  -3  16  135.52   12.12
   3   3  16  135.85   15.18
  -3  -3 -16  155.62   22.82
   3  -3 -16  117.69   19.59
  -3   3 -16  169.12   13.65
   3   3 -16  130.94   18.52
   3   3 -17   60.88   13.06
   3  -3 -17   61.79   12.56
   3  -3  17   53.25   14.09
   3   3  17   58.88   14.46
  -3  -3 -17   69.70   12.67
   3  -3 -17   45.17    9.31
  -3   3 -17   54.89   12.21
   3   3 -17   57.06   11.44
   3   3 -18    1.40    5.30
   3  -3 -18    7.25    5.30
   3  -3  18    6.34    5.23
   3   3  18    3.92    3.37
  -3  -3 -18    5.44    2.49
   3  -3 -18    1.70    1.91
  -3   3 -18    4.18    3.72
   3   3 -18   -4.10    3.57
   3   3 -19   33.11    8.42
   3  -3 -19   29.08    8.68
   3  -3  19   27.58   10.35
   3   3  19   29.09    7.77
  -3  -3 -19   16.85    4.90
  -3   3 -19   20.51    8.11
   3   3 -19   18.21    7.72
   3  -3 -20   10.60    4.20
   3  -3  20    3.05    4.82
   3   3  20    6.38    4.13
  -3  -3 -20    2.47    3.80
  -3   3 -20    4.80    2.72
   3   3 -20    4.28    2.01
   3  -3 -21   23.26    7.86
   3  -3  21   26.60    8.30
   3   3  21   28.87   10.24
  -3  -3  21   17.73   10.51
  -3  -3 -21   30.08    7.35
  -3   3 -21    9.95    3.63
   3   3 -21   17.44    6.24
  -3  -3 -22    8.51    3.41
   3   3 -22   13.02    5.57
   4   0   0  186.66    4.20
  -4   0   0  182.08    5.04
   0  -4   0  197.20    3.88
   0  -4   1 1954.84   26.35
   0   4   1 1837.45   24.89
   4   0  -1 1893.27   26.77
   4   0   1 1842.17   26.95
  -4   0  -1 1846.80   25.65
   0   4  -1 1878.81   26.42
   0  -4   1 1828.28   27.37
   0  -4  -1 1830.58   25.86
   0  -4   2  206.28    3.27
   0  -4  -2  217.18    3.67
   4   0  -2  203.11    5.88
   4   0   2  197.82    4.41
  -4   0  -2  200.98    5.57
   0   4  -2  195.89    7.13
   0  -4   2  190.06    6.91
   0  -4  -2  201.56    5.31
   0  -4  -3 1191.78   16.91
   4   0  -3 1136.81   16.77
   4   0   3 1202.66   19.11
   0  -4   3 1154.81   16.49
   0  -4  -3 1244.55   17.97
  -4   0  -3 1138.33   17.31
   0   4  -3 1170.46   17.58
   4   0  -3 1161.22   16.61
   0  -4   3 1148.67   17.89
   0  -4  -3 1130.65   16.41
   0   4  -4  189.69    3.84
   0  -4  -4  199.77    4.51
   4   0  -4  195.86    4.19
   4   0   4  186.93    4.69
   0  -4  -4  202.96    3.62
  -4   0  -4  185.33    4.67
   0   4  -4  192.00    6.17
   4   0  -4  193.77    7.42
   0  -4   4  237.36    6.64
   0  -4  -4  200.58    4.09
   0   4  -5  252.27    4.32
   0  -4  -5  277.61    7.02
   4   0  -5  257.74    5.30
   4   0   5  264.12    5.36
   0  -4  -5  264.91    5.80
  -4   0  -5  256.85    4.05
   0   4  -5  246.90    5.89
   4   0  -5  261.36    6.80
   0  -4   5  247.77    4.63
   0  -4  -5  263.21    4.99
   0   4  -6  626.68   10.51
   4   0  -6  708.70   12.36
   4   0   6  661.88   12.01
   0  -4  -6  645.00   10.61
  -4   0  -6  640.82   11.07
   0   4  -6  638.18   15.19
   4   0  -6  639.79   10.88
   0  -4  -6  636.24   10.67
   0   4  -7  182.95    9.81
   0  -4  -7  218.09   12.64
   4   0  -7  168.70    9.34
   4   0   7  179.38    9.93
   0  -4  -7  181.34   10.95
  -4   0  -7  183.38   10.29
   0   4  -7  168.56   10.51
   4   0  -7  169.15    9.18
   0  -4  -7  172.33   10.01
   0   4  -8   74.39    8.27
   0  -4  -8   67.44    4.59
   4   0  -8   75.93   11.92
   4   0   8   68.89   11.70
   0  -4  -8   72.11    4.78
  -4   0  -8   76.73   10.97
   0   4  -8   70.35    6.22
   4   0  -8   74.25    9.75
   0  -4  -8   62.10    4.86
  -4   0   8   79.24    5.35
   0   4  -9    7.58    4.85
   0  -4  -9    7.15    3.62
   4   0  -9   15.76    4.76
   4   0   9   11.26    5.93
   0  -4  -9    6.27    1.46
  -4   0  -9    7.95    4.45
   4   0  -9   10.85    3.86
   0   4  -9   16.04    3.82
  -4   0   9    9.52    1.49
   0   4 -10   -0.71    2.38
   0  -4 -10   -0.75    3.39
   4   0 -10    6.25    5.22
   4   0  10    0.40    2.71
   0  -4 -10    3.21    1.08
  -4   0 -10   -1.66    3.71
   4   0 -10    2.16    1.89
   0   4 -10   -4.05    4.92
   0   4 -11  680.17   18.64
   0  -4 -11  662.05   12.89
   4   0 -11  655.43   18.57
   4   0  11  690.54   15.35
   0  -4 -11  673.07   13.04
  -4   0 -11  679.65   13.32
   4   0 -11  688.14   13.58
   0   4 -11  663.97   16.74
   0  -4 -12  182.39   10.04
   4   0 -12  184.03   15.36
   4   0  12  177.34    9.21
   0  -4 -12  181.52    9.35
  -4   0 -12  196.66    9.88
   4   0 -12  190.65    9.36
   0   4 -12  199.58   11.13
  -4   0 -12  176.52    8.05
   0  -4 -13  116.63   17.88
   4   0 -13  101.66   15.18
   4   0  13  114.24   12.17
   0  -4  13  102.55    7.89
   0  -4 -13  107.22   13.29
  -4   0 -13  111.26   13.56
   4   0 -13  105.86   11.54
   0   4 -13   91.32   13.72
   0  -4 -14    9.42    3.36
   4   0 -14    9.67    5.43
   4   0  14    9.22    6.04
   0  -4  14   12.56    6.47
   0  -4 -14   20.95    4.71
  -4   0 -14    9.24    5.99
   4   0 -14   17.14    4.16
   0   4 -14   10.05    4.90
   0  -4 -15  244.76   20.29
   4   0 -15  269.38   16.16
   4   0  15  255.39   17.06
   0  -4  15  281.25   15.03
   0  -4 -15  268.33   12.46
  -4   0 -15  230.48   21.84
   4   0 -15  262.77    8.23
   0   4 -15  234.23   13.79
   4   0  16  250.22   18.24
   0  -4  16  234.27   19.94
   0  -4 -16  234.67    9.40
  -4   0 -16  273.27    9.20
   4   0 -16  288.53    8.42
   0   4 -16  284.68   11.32
   4   0 -17   78.62   15.74
   4   0  17   80.84   20.99
   0  -4  17   95.70   14.50
   0   4  17   83.71   13.58
   0  -4 -17   84.73   13.97
  -4   0 -17   73.86   16.33
   4   0 -17   75.59   16.38
   0   4 -17   69.26   18.68
   4   0 -18    3.24    3.55
   4   0  18    0.85    3.68
   0  -4  18   -1.94    3.89
   0   4  18    3.77    4.57
   0  -4 -18    4.92    2.23
  -4   0 -18   -1.01    3.97
   4   0 -18    0.02    2.45
   0   4 -18    3.90    4.59
   4   0 -19   13.00    5.22
   4   0  19   31.96    9.69
   0  -4  19   30.84    7.04
   0   4  19   25.04    5.99
   0  -4 -19   29.88    4.44
  -4   0 -19   23.68    5.77
   4   0 -19   18.39    4.23
   0   4 -19   28.30    8.52
   4   0  20   17.02    7.96
   0  -4  20   68.14   22.03
   0   4  20   26.50    9.46
   0  -4 -20   29.55    5.15
  -4   0 -20   22.86    4.41
   4   0 -20   27.46    7.77
   0   4 -20   33.23    9.88
   4   0 -21   17.85    5.18
   4   0  21    9.60    6.32
   0  -4  21   12.83    5.82
   0   4  21   11.57    5.99
  -4   0 -21   11.82    4.47
   0   4 -21   11.47    4.40
   0  -4  22    4.70    7.15
  -4   0 -22   16.75    6.16
   0   4 -22   27.09    6.86
   4  -1   0   13.78    4.51
   4   1   0    7.76    3.66
  -1   4   0    9.33    1.67
  -4   1   0   10.80    2.04
  -1   4   0    6.67    2.03
   1  -4   0    5.69    2.18
  -1  -4   0   11.81    2.65
   1   4   1 1078.04   14.81
   1   4  -1 1127.99   15.32
   1  -4  -1 1116.66   16.06
  -1  -4   1 1109.55   15.06
  -1   4   1 1084.46   15.12
   4   1  -1 1164.02   18.53
   4  -1  -1 1122.17   16.92
   4  -1   1 1095.66   17.24
   4   1   1 1084.07   18.09
  -1   4  -1 1105.72   15.36
   1   4   1 1117.62   15.30
  -4   1  -1 1144.79   16.82
  -1   4  -1 1113.25   16.77
   1  -4  -1 1126.96   17.31
  -1  -4   1 1124.76   16.78
  -1  -4  -1 1107.02   17.31
   1   4  -2 1030.49   14.55
   1  -4  -2 1131.65   16.04
  -1  -4   2 1065.23   14.98
   4   1  -2 1089.75   17.23
   4  -1  -2 1016.57   15.18
   4  -1   2 1049.32   15.63
   4   1   2  978.32   15.56
   1  -4   2  992.86   14.41
   1   4   2 1022.41   14.34
  -4  -1  -2 1013.17   16.26
  -4   1  -2  991.36   14.73
  -1   4  -2 1040.24   15.50
   1   4  -2 1028.86   15.74
   1  -4  -2 1036.04   16.85
  -1  -4   2 1016.60   16.27
  -1  -4  -2 1000.85   14.72
   1   4  -3  887.37   12.92
   1  -4  -3  815.74   12.99
   4   1  -3  808.37   12.95
   4  -1  -3  890.28   13.83
   4  -1   3  796.98   14.05
   4   1   3  851.81   13.04
   1  -4   3  869.95   12.73
   1  -4  -3  812.92   12.36
  -1  -4  -3  897.41   14.16
  -4  -1  -3  812.74   12.72
  -4   1  -3  881.84   13.47
  -1   4  -3  800.23   12.70
   1   4  -3  856.38   14.30
   4  -1  -3  894.03   13.34
   4   1  -3  792.80   12.25
   1  -4  -3  820.93   13.55
  -1  -4   3  825.97   13.18
  -1  -4  -3  895.69   13.36
  -1  -4  -4  344.53    6.65
   1  -4  -4  354.38    5.76
   4   1  -4  357.53    8.49
   4  -1  -4  342.48    6.21
   4  -1   4  360.90    5.47
   4   1   4  337.67    7.68
   1  -4   4  360.56    5.04
  -1  -4  -4  338.44    5.04
   1  -4  -4  359.32    3.91
  -4  -1  -4  357.82    6.71
  -4   1  -4  346.76    8.32
  -1   4  -4  382.27    6.69
   4  -1  -4  347.82    3.98
   1   4  -4  355.15    9.11
   4   1  -4  339.38    5.91
  -1  -4   4  343.37    4.70
  -1  -4  -4  337.56    5.89
  -1  -4  -5  464.36    7.84
   1   4  -5  460.99    8.68
   1  -4  -5  422.79   20.54
   4   1  -5  423.20   21.20
   4  -1  -5  462.97   10.51
   4  -1   5  429.49    8.13
   4   1   5  456.59   11.63
  -1  -4  -5  439.41    9.41
   1  -4  -5  443.63    7.79
  -4  -1  -5  453.18    9.63
  -4   1  -5  453.10    8.11
  -1   4  -5  426.91    8.16
   4  -1  -5  483.37    8.12
   1   4  -5  459.09   13.84
   4   1  -5  424.46   21.38
  -1  -4   5  466.89    8.93
  -1  -4  -5  448.33    7.93
  -4  -1   5  431.31    8.13
  -1  -4  -6  263.87    8.82
   1  -4  -6  221.80    5.87
   4   1  -6  266.38    8.41
   4  -1  -6  253.52    5.24
   4  -1   6  231.25    8.55
   4   1   6  252.80    9.44
   1  -4   6  261.53    6.29
  -1  -4  -6  253.11    5.92
   1  -4  -6  233.16    4.08
  -4  -1  -6  231.20    5.90
  -4   1  -6  248.87    4.50
  -1   4  -6  217.89    4.97
   4  -1  -6  264.22    6.68
   1   4  -6  250.30    5.81
   4   1  -6  234.90    5.58
  -1  -4   6  233.59    6.31
  -1  -4  -6  249.97    3.71
  -4  -1   6  262.68    3.85
  -1  -4  -7 1798.63   38.41
   1   4  -7 1712.07   36.69
   1  -4  -7 1721.24   36.81
   4   1  -7 1747.35   38.49
   4  -1  -7 1686.33   36.86
   4  -1   7 1738.06   37.61
   4   1   7 1798.15   39.14
   1  -4   7 1767.67   37.76
  -1  -4  -7 1799.67   38.88
   1  -4  -7 1713.91   36.65
  -4  -1  -7 1706.57   37.64
  -4   1  -7 1696.85   38.50
   4  -1  -7 1777.41   37.41
  -1   4  -7 1711.97   38.34
   1   4  -7 1865.04   40.58
   4   1  -7 1716.97   38.08
  -1  -4  -7 1750.67   36.97
  -4  -1   7 1746.62   36.68
  -1  -4  -8  165.43   11.11
   1   4  -8  158.88    8.75
   1  -4  -8  144.47    8.72
   4   1  -8  139.56   13.65
   4  -1  -8  169.80    9.68
   4  -1   8  137.35    8.28
   4   1   8  195.12   19.17
   1  -4   8  173.09   13.31
  -1  -4  -8  178.30   10.42
   1  -4  -8  146.22    7.80
  -4  -1  -8  155.89   11.82
  -4   1  -8  162.38   13.83
   4  -1  -8  167.18    8.87
  -1   4  -8  154.25   13.46
   1   4  -8  172.24   12.58
   4   1  -8  145.54    9.77
  -1  -4  -8  172.56    9.44
  -4  -1   8  169.87    8.90
  -1  -4  -9  693.67   19.04
   1   4  -9  664.73   20.13
   1  -4  -9  804.07   21.71
   4   1  -9  623.26   18.84
   4  -1  -9  700.94   21.03
   4  -1   9  660.60   21.00
   4   1   9  676.44   19.07
   1  -4   9  701.42   21.10
  -1  -4  -9  700.26   18.82
   1  -4  -9  663.31   17.23
  -4  -1  -9  652.29   18.90
  -4   1  -9  683.04   19.05
   4  -1  -9  701.36   18.19
  -1   4  -9  657.31   20.94
   1   4  -9  679.68   22.91
   4   1  -9  664.30   19.94
  -1  -4  -9  702.48   18.66
  -4  -1   9  697.19   17.51
  -4  -1  -9  653.46   17.48
  -1  -4 -10  291.16   10.18
   1   4 -10  313.71   10.66
   1  -4 -10  316.47   10.66
   4   1 -10  298.27   11.70
   4  -1 -10  297.56   11.28
   4  -1  10  318.62   13.50
   4   1  10  316.41   11.14
   1  -4  10  302.58   12.35
  -1  -4 -10  296.21   11.76
   1  -4 -10  289.17    9.10
  -4  -1 -10  307.87   10.89
  -4   1 -10  299.65   10.23
   4  -1 -10  319.03   11.03
  -1   4 -10  299.51   11.67
   4   1 -10  309.55   10.50
   1   4 -10  297.42   20.96
  -1  -4 -10  307.94    9.11
  -4  -1  10  295.71    7.82
  -4   1  10  307.40    8.14
  -4  -1 -10  302.93    8.46
  -1  -4 -11   65.28   16.49
   1   4 -11   63.39   14.15
   1  -4 -11   73.43    9.72
   4   1 -11   58.22   12.55
   4  -1 -11   59.53   14.52
   4  -1  11   70.39   17.97
   4   1  11   69.39   14.94
   1  -4  11   61.92    7.87
  -1  -4 -11   62.84   13.69
   1  -4 -11   61.50    8.19
  -4  -1 -11   70.03   14.46
  -4   1 -11   66.46    8.82
   4  -1 -11   64.32    7.93
  -1   4 -11   69.52    9.24
   4   1 -11   71.10   13.48
   1   4 -11   59.30   13.49
  -4  -1 -11   67.43    7.89
   1   4 -12   38.59    6.29
   1  -4 -12   59.18   12.59
   4   1 -12   61.66   12.87
   4  -1 -12   36.67    8.62
   4  -1  12   60.13   12.03
   4   1  12   40.83    8.07
   1  -4  12   38.48    7.68
  -1  -4 -12   50.54   11.84
   1  -4 -12   52.85   10.99
  -4  -1 -12   63.72   11.82
  -4   1 -12   47.16    8.08
   4  -1 -12   44.74    5.07
  -1   4 -12   65.20   13.58
   4   1 -12   55.63    6.93
   1   4 -12   46.93    7.35
  -4  -1 -12   58.56    5.32
   1   4 -13   45.57    9.86
   1  -4 -13   49.82    9.63
   4   1 -13   40.31    8.55
   4  -1 -13   42.69    9.52
   4  -1  13   54.16    9.88
   4   1  13   37.93    8.17
   1  -4  13   50.31    7.43
   1   4  13   52.59   10.24
  -1  -4 -13   56.82   10.61
   1  -4 -13   41.94    7.37
  -4  -1 -13   50.46   11.24
  -4   1 -13   50.43    9.35
   4  -1 -13   45.48    8.40
  -1   4 -13   40.73   12.73
   4   1 -13   50.41    8.14
   1   4 -13   44.77    9.25
   1   4 -14   41.46    9.67
   1  -4 -14   29.64    7.06
   4   1 -14   36.11    7.08
   4  -1 -14   32.57   10.33
   4  -1  14   39.07   11.78
   4   1  14   38.56    9.45
   1  -4  14   42.80   12.53
   1   4  14   37.95    7.70
  -1  -4 -14   35.51    7.00
   1  -4 -14   37.25    5.81
  -4  -1 -14   40.86    8.32
  -4   1 -14   41.04    9.58
   4  -1 -14   33.00    6.74
  -1   4 -14   34.61    9.80
   4   1 -14   38.26    6.08
   1   4 -14   44.43    8.08
   1   4 -15   63.34   13.13
   1  -4 -15   59.62   12.69
   4   1 -15   64.66   10.54
   4  -1 -15   85.44   15.36
   4  -1  15   60.39   12.88
   4   1  15   64.50   21.21
   1  -4  15   72.75   16.09
   1   4  15   50.31   14.49
  -1  -4 -15   68.60   10.41
   1  -4 -15   55.57   10.10
  -4  -1 -15   54.79   10.21
  -4   1 -15   63.45   14.72
   4  -1 -15   65.35    7.85
  -1   4 -15   52.15   14.39
   4   1 -15   51.72    8.84
   1   4 -15   61.35   14.17
   1  -4 -16  135.13   15.75
   4   1 -16  190.51   13.24
   4  -1 -16  184.65   24.37
   4  -1  16  141.42   19.47
   4   1  16  156.60   16.90
   1  -4  16  157.26   13.44
   1   4  16  166.32    8.97
  -1  -4  16  137.80   17.65
  -1  -4 -16  162.62   13.43
   1  -4 -16  143.25   18.58
  -4  -1 -16  155.25   13.73
  -4   1 -16  161.07   13.92
   4  -1 -16  140.01   18.45
  -1   4 -16  139.26   16.40
   4   1 -16  140.68   20.85
   1   4 -16  136.53   19.51
   1  -4 -17   41.51    6.93
   4   1 -17   30.23    8.87
   4  -1 -17   32.50    5.44
   4  -1  17   38.24   10.82
   4   1  17   28.01    6.76
   1  -4  17   42.13   13.78
   1   4  17   24.29    8.02
  -1  -4  17   31.84    6.90
  -1  -4 -17   36.82    6.73
   1  -4 -17   29.68    4.68
  -4  -1 -17   36.34    6.56
  -4   1 -17   38.33    6.28
   4  -1 -17   34.17    6.86
  -1   4 -17   26.42    6.54
   4   1 -17   25.51    7.32
   1   4 -17   26.49    7.60
   4   1 -18   19.81    9.93
   4  -1 -18   31.34    8.26
   4  -1  18   25.49   10.46
   4   1  18   23.85    6.74
   1  -4  18   21.39    8.82
   1   4  18   17.81    7.15
  -1  -4  18   18.34    6.07
  -1  -4 -18   18.18    4.60
   1  -4 -18   23.90    4.38
  -4  -1 -18   18.96    4.67
  -4   1 -18   27.22    6.01
   4  -1 -18   24.99    4.07
  -1   4 -18   13.51    5.77
   4   1 -18   32.05    6.65
   1   4 -18   25.61    7.53
   4   1 -19   55.99   11.83
   4  -1 -19   49.40   10.18
   4  -1  19   58.64   15.97
   4   1  19   53.25   13.46
   1  -4  19   51.99   10.93
   1   4  19   55.05   15.02
  -1  -4  19   54.24   16.16
  -1   4  19   36.17   13.36
  -1  -4 -19   66.10    7.51
   1  -4 -19   68.42    8.98
  -4  -1 -19   64.72   15.22
  -4   1 -19   46.55   14.44
   4  -1 -19   37.65   10.68
  -1   4 -19   59.52   16.08
   4   1 -19   35.55   14.72
   1   4 -19   49.30   15.70
   4   1 -20   38.83    9.98
   4  -1 -20   29.39    7.82
   4  -1  20   29.85    9.44
   4   1  20   24.94    6.54
   1  -4  20   28.61    6.23
   1   4  20   31.35    9.96
  -1  -4  20   32.59   11.18
  -1   4  20   22.40    7.59
  -1  -4 -20   29.37    5.37
  -4  -1 -20   32.73    8.06
  -4   1 -20   28.72    6.62
  -1   4 -20   30.07    9.36
   4   1 -20   26.18   10.48
   1   4 -20   23.81    6.50
   4   1 -21   16.23    6.66
   4  -1 -21   24.12    7.26
   4  -1  21   18.73    5.59
   4   1  21   24.53    8.88
   1  -4  21   16.60    7.97
   1   4  21   21.88    6.76
  -1  -4  21   28.95    5.44
  -1   4  21   26.62    9.42
  -1  -4 -21   24.00    4.32
  -4  -1 -21   27.24    5.91
  -4   1 -21   23.57    4.29
  -1   4 -21   10.98    4.76
   4   1 -21   18.22    7.21
   1   4 -21   25.23    8.58
   1  -4  22    4.97    3.63
  -1  -4  22   27.19   15.49
  -1  -4 -22    3.26    2.26
  -4  -1 -22    6.27    3.17
  -4   1 -22    8.19    4.13
   1   4 -22    3.79    3.19
   2  -4   0 1139.14   16.62
   2   4   0 1187.49   16.45
   4  -2   0 1172.17   17.70
   4   2   0 1155.19   19.24
  -2  -4   0 1185.11   16.25
  -4   2   0 1213.34   16.83
  -2   4   0 1203.93   17.52
  -2  -4   0 1214.08   17.81
  -4  -2   0 1167.07   18.91
   2   4  -1  108.71    2.56
   2  -4  -1   98.87    3.20
   4   2  -1   95.06    3.32
   4  -2  -1  105.87    3.91
  -2  -4   1   94.40    2.58
   4  -2   1  106.96    6.63
   2  -4   1  115.36    2.92
   4   2   1  104.12    4.58
   2   4   1  109.00    4.58
  -2  -4  -1  108.89    2.01
  -4  -2  -1   99.27    7.12
  -4   2   1  102.58    2.13
  -4   2  -1  118.82    3.59
   4  -2  -1  110.92    2.45
  -2   4  -1   97.00    3.75
  -2   4   1  105.65    2.89
  -2  -4   1   96.66    4.34
  -2  -4  -1  112.30    4.62
  -4  -2   1  107.37    5.56
  -4  -2  -1   92.98    3.22
   4   2  -2  302.59    9.45
   4  -2  -2  372.06    5.19
   4   2   2  373.08    5.47
   2  -4   2  371.85    5.34
  -2   4   2  350.23    2.53
  -4   2  -2  360.46    4.15
  -2   4  -2  306.69    6.66
   2   4  -2  345.35    5.53
  -2  -4  -2  364.08    4.84
  -4  -2   2  359.70    5.27
   2   4  -3  490.01    8.51
   2  -4  -3  556.17    9.39
   4   2  -3  538.32   10.12
   4  -2  -3  488.28   10.94
   4  -2   3  546.33    9.59
   4   2   3  493.25    9.12
   2  -4   3  487.33    8.39
   2   4   3  553.23    8.78
  -2  -4  -3  478.26   10.31
  -4  -2  -3  545.83    9.81
  -4   2  -3  492.46    8.74
  -2   4  -3  557.88   12.95
   2   4  -3  495.86   11.25
   4   2  -3  531.22    8.85
  -2  -4   3  549.47   10.24
  -2  -4  -3  490.61   10.37
  -4  -2   3  484.89    8.80
  -4  -2  -3  521.77    9.17
   2   4  -4 1363.14   20.04
   2  -4  -4 1290.24   19.86
   4   2  -4 1304.66   20.18
   4  -2  -4 1352.13   20.04
   4  -2   4 1320.46   20.41
   4   2   4 1349.28   20.66
   2  -4   4 1359.80   20.43
   2   4   4 1356.79   19.71
   2  -4  -4 1309.50   18.38
  -2  -4  -4 1377.57   21.40
  -4  -2  -4 1348.14   20.57
  -4   2  -4 1359.27   22.30
  -2   4  -4 1357.63   21.03
   2   4  -4 1360.36   20.68
   4   2  -4 1332.77   20.41
  -2  -4   4 1357.51   20.18
  -2  -4  -4 1346.53   20.25
  -4  -2  -4 1293.76   18.82
   2   4  -5  880.47   13.99
   2  -4  -5  848.14   13.89
   4   2  -5  868.01   14.56
   4  -2  -5  882.76   15.78
   4  -2   5  886.82   17.19
   4   2   5  875.12   14.76
   2  -4   5  878.75   13.76
   2   4   5  845.13   14.03
  -2  -4  -5  869.24   13.50
   2  -4  -5  890.53   12.83
  -4  -2  -5  858.77   13.73
   4  -2  -5  915.31   13.30
  -2   4  -5  882.04   14.98
   2   4  -5  889.38   16.20
   4   2  -5  872.37   14.52
  -2  -4   5  850.19   13.34
  -2  -4  -5  875.27   14.05
  -4  -2   5  865.49   13.73
  -4  -2  -5  871.10   15.23
   2   4  -6 2509.37   35.85
   2  -4  -6 2615.44   38.62
   4   2  -6 2553.65   37.91
   4  -2  -6 2583.04   38.53
   4  -2   6 2519.30   37.24
   4   2   6 2567.41   36.50
   2  -4   6 2630.47   37.43
   2   4   6 2699.24   38.13
  -2  -4  -6 2536.65   38.27
  -4  -2  -6 2628.64   39.61
   2  -4  -6 2785.73   39.06
  -4   2  -6 2558.71   36.52
   4  -2  -6 2509.10   34.90
  -2   4  -6 2562.73   36.56
   2   4  -6 2571.60   39.72
   4   2  -6 2556.91   37.29
  -2  -4   6 2567.11   36.26
  -2  -4  -6 2544.67   35.86
  -4  -2   6 2498.11   35.04
  -4  -2  -6 2546.71   35.70
   2   4  -7  326.74   16.55
   2  -4  -7  410.30   20.73
   4   2  -7  397.22   20.66
   4  -2  -7  321.33   16.61
   4  -2   7  411.73   20.45
   4   2   7  322.24   16.75
   2  -4   7  330.77   16.78
   2   4   7  378.50   18.68
  -2  -4  -7  314.62   15.62
  -4  -2  -7  395.21   20.14
   2  -4  -7  404.02   19.85
  -4   2  -7  332.16   16.80
   4  -2  -7  320.01   15.70
  -2   4  -7  392.34   19.99
   2   4  -7  327.67   19.99
   4   2  -7  386.30   19.28
  -2  -4   7  378.41   18.93
  -2  -4  -7  302.32   15.85
  -4  -2   7  311.53   15.13
  -4  -2  -7  382.25   18.61
   2   4  -8  347.02   17.55
   2  -4  -8  365.76   18.26
   4   2  -8  360.82   19.21
   4  -2  -8  328.38   18.67
   4  -2   8  386.52   20.22
   4   2   8  333.03   17.14
   2  -4   8  337.04   16.87
   2   4   8  390.51   19.84
  -2  -4  -8  351.90   18.01
  -4  -2  -8  377.42   19.17
   2  -4  -8  382.46   19.04
  -4   2  -8  332.23   19.26
   4  -2  -8  348.70   17.24
  -2   4  -8  362.93   19.47
   2   4  -8  517.71   26.24
   4   2  -8  378.65   18.95
  -2  -4   8  383.20   19.08
  -2  -4  -8  352.57   17.50
  -4  -2   8  335.98   16.91
  -4  -2  -8  390.34   19.67
   2   4  -9  223.91   21.55
   2  -4  -9  202.97   16.17
   4   2  -9  208.22   11.86
   4  -2  -9  212.47   16.78
   4  -2   9  200.57   11.86
   4   2   9  204.78    7.26
   2  -4   9  223.79   21.30
   2   4   9  195.68   15.88
  -2  -4  -9  220.78    7.33
  -4  -2  -9  200.00   15.47
   2  -4  -9  203.15    5.45
  -4   2  -9  231.19   10.36
   4  -2  -9  229.02    8.96
  -2   4  -9  200.79    7.00
   2   4  -9  222.61   28.20
   4   2  -9  217.04    7.75
  -2  -4   9  218.52    5.62
  -2  -4  -9  209.64    8.12
  -4  -2   9  210.78    4.88
  -4  -2  -9  202.38    4.69
   2  -4 -10  341.04   10.07
   4   2 -10  334.52   10.27
   4  -2 -10  321.34   13.47
   4  -2  10  338.30    9.48
   4   2  10  292.91    9.07
   2  -4  10  369.58   20.65
   2   4  10  333.38   11.88
  -2  -4 -10  319.61    7.95
  -4  -2 -10  322.19    9.30
   2  -4 -10  329.54    7.71
   4  -2 -10  330.20    7.37
  -2   4 -10  339.81   12.63
   2   4 -10  324.55   10.60
   4   2 -10  324.87    8.91
  -2  -4 -10  305.60    9.22
  -4  -2  10  318.31    5.82
  -4  -2 -10  325.13   10.92
   2   4 -11 1030.88   22.86
   2  -4 -11  988.55   22.11
   4   2 -11  998.99   18.50
   4  -2 -11 1031.04   23.61
   4  -2  11 1004.04   18.85
   4   2  11 1058.81   24.12
   2  -4  11 1200.48   24.75
   2   4  11  989.44   19.32
  -2  -4 -11 1045.51   18.44
  -4  -2 -11 1005.00   19.28
   2  -4 -11 1027.23   17.45
  -4   2 -11 1095.10   21.02
   4  -2 -11 1044.57   17.36
  -2   4 -11 1036.80   19.22
   4   2 -11 1030.72   18.71
   2   4 -11 1055.38   30.51
  -4  -2  11 1047.76   14.75
  -2  -4 -11 1047.75   15.28
  -4  -2 -11 1024.85   14.84
   2   4 -12   87.18   13.94
   2  -4 -12   95.11   14.66
   4   2 -12  103.91    8.74
   4  -2 -12   73.30   12.54
   4  -2  12   96.78    6.34
   4   2  12   76.17   14.66
   2  -4  12   80.09   17.29
   2   4  12   84.35    6.73
  -2  -4 -12   69.74   13.05
  -4  -2 -12   81.89    6.76
   2  -4 -12   97.85   11.38
  -4   2 -12   88.12   10.74
   4  -2 -12   79.85   10.37
  -2   4 -12  107.68   17.61
   4   2 -12   96.85   12.74
   2   4 -12   82.43   15.57
  -4  -2 -12   96.14    3.14
   2   4 -13   20.51    4.44
   2  -4 -13  124.99   32.43
   4   2 -13   11.99    5.38
   4  -2 -13   25.65    5.64
   4  -2  13   31.80    8.29
   4   2  13   20.86    4.83
   2  -4  13   30.10    7.54
   2   4  13   24.95    6.12
  -2  -4 -13   23.80    4.20
  -4  -2 -13   24.17    6.36
   2  -4 -13   19.99    4.24
  -4   2 -13   19.24    5.26
   4  -2 -13   20.36    3.70
  -2   4 -13   29.91    5.53
   4   2 -13   21.10    4.73
   2   4 -13   26.17    6.54
   2   4 -14   21.87    5.18
   2  -4 -14   29.28    5.50
   4   2 -14   33.17   13.48
   4  -2 -14   24.28    9.84
   4  -2  14   23.16    9.02
   4   2  14   23.40    5.20
   2  -4  14   25.98    7.10
   2   4  14   22.06    7.05
  -2  -4 -14   28.99    5.77
  -4  -2 -14   34.33    8.07
   2  -4 -14   24.89    5.09
  -4   2 -14   23.11    6.49
   4  -2 -14   66.19   13.69
  -2   4 -14   25.48    7.39
   4   2 -14   17.90    7.55
   2   4 -14   19.11    4.42
   2   4 -15   13.95    5.73
   2  -4 -15   25.57    7.34
   4   2 -15   12.17    4.88
   4  -2 -15   35.70    8.94
   4  -2  15   10.99    4.90
   4   2  15   32.11    5.97
   2  -4  15   27.85    6.71
   2   4  15   11.88    5.90
  -2  -4 -15   27.11    4.48
  -4  -2 -15   14.47    4.96
   2  -4 -15   23.71    3.66
  -4   2 -15   18.38    5.43
   4  -2 -15   22.57    4.12
  -2   4 -15    5.88    2.92
   4   2 -15   17.73    4.08
   2   4 -15   22.40    6.49
   2   4 -16    2.49    3.27
   2  -4 -16   12.63    5.28
   4   2 -16    9.61    2.94
   4  -2 -16   12.73    5.91
   4  -2  16    8.49    4.05
   4   2  16    4.51    3.64
   2  -4  16    2.30    2.06
   2   4  16    4.83    2.65
  -2  -4 -16   10.64    2.99
  -4  -2 -16    9.17    3.52
   2  -4 -16   12.94    4.05
  -4   2 -16    3.35    4.14
   4  -2 -16    2.39    1.93
  -2   4 -16   23.38   10.33
   4   2 -16    8.27    3.56
   2   4 -16   12.15    5.54
   2   4 -17   59.39   12.36
   2  -4 -17   60.62   12.42
   4   2 -17   65.16   12.94
   4  -2 -17   53.54   10.67
   4  -2  17   58.12   14.16
   4   2  17   64.20   13.59
   2  -4  17   56.96   12.24
   2   4  17   57.91   11.40
  -2  -4 -17   59.84    9.73
  -4  -2 -17   64.55   11.43
   2  -4 -17   55.67    9.43
  -4   2 -17   54.59   11.51
   4  -2 -17   53.43   11.42
  -2   4 -17   59.77    9.16
   4   2 -17   58.57    9.87
   2   4 -17   59.21    6.59
   4   2 -18   39.90    9.44
   4  -2 -18   30.55    6.56
   4  -2  18   29.97    7.23
   4   2  18   24.16    9.06
   2  -4  18   25.61    7.12
   2   4  18   80.92   24.05
  -2  -4  18   36.08    7.82
  -2  -4 -18   31.51    5.43
  -4  -2 -18   19.84    4.96
   2  -4 -18   39.11    6.56
  -4   2 -18   17.09    6.64
   4  -2 -18   17.19    4.74
  -2   4 -18   21.65    7.21
   4   2 -18   24.82    8.83
   2   4 -18   14.45    6.10
   2  -4 -19   18.17    6.72
   4   2 -19   10.92    3.54
   4  -2 -19   10.96    5.45
   4  -2  19   12.43    6.34
   4   2  19   15.12    6.76
   2  -4  19   11.40    4.78
   2   4  19   15.62    5.60
  -2  -4  19   19.23    9.53
  -2  -4 -19   22.72    4.38
  -4  -2 -19   12.04    4.59
  -4   2 -19   14.44    4.57
  -2   4 -19   17.59    5.93
   4   2 -19   15.33    6.06
   2   4 -19   18.15    4.37
   4   2 -20    4.04    1.71
   4  -2 -20   -1.23    4.06
   4  -2  20    8.67    3.41
   2  -4  20   16.14    6.51
   2   4  20    5.70    4.86
  -2  -4  20    2.64    4.11
  -2  -4 -20    2.81    2.31
  -4  -2 -20    5.17    1.85
  -4   2 -20    6.35    4.84
  -2   4 -20   -0.50    4.86
   4   2 -20    3.29    3.29
   2   4 -20    1.79    4.35
   4   2 -21   11.32    5.38
   4  -2  21   19.18    8.73
   4   2  21   16.47    8.33
   2  -4  21   19.23    7.38
   2   4  21    6.31    3.74
  -2  -4  21   12.92    5.27
  -2   4  21    6.97    3.96
  -2  -4 -21   26.52    5.87
  -4  -2 -21   12.40    4.75
  -4   2 -21   13.73    4.79
  -2   4 -21   13.72    6.72
   4   2 -21   23.86    6.79
   2   4 -21   31.05   10.11
  -2  -4 -22   34.72    8.68
  -4  -2 -22   44.03   11.51
   4   2 -22   29.80   10.07
   2   4 -22   78.65   36.52
   3  -4   0 2480.70   34.25
   3   4   0 2367.46   32.40
   4  -3   0 2368.63   33.12
   4   3   0 2428.05   33.83
  -4   3   0 2409.48   32.74
  -3   4   0 2587.92   35.30
  -3  -4   0 2456.26   34.60
  -4  -3   0 2305.19   32.55
   3   4  -1  864.25   12.84
   3  -4  -1  953.02   15.63
   4   3  -1  961.30   14.18
   4  -3  -1  848.48   14.70
   3  -4   1  831.59   14.17
   4  -3   1  948.35   15.43
   4   3   1  838.94   12.68
   3   4   1  952.27   13.69
  -4   3   1  950.58   13.00
  -3   4  -1  983.22   15.46
   4  -3  -1  867.14   12.01
  -3   4   1  843.13   12.18
  -3  -4   1  948.51   14.35
  -3  -4  -1  853.86   13.47
  -4  -3   1  832.27   13.13
  -4  -3  -1  942.83   14.39
   3   4  -2 1913.73   26.98
   3  -4  -2 2161.14   30.61
   4   3  -2 2072.32   29.24
   4  -3  -2 1875.16   26.70
   4  -3   2 2146.01   31.88
   3  -4   2 1945.63   27.91
   4   3   2 1845.49   25.96
   3   4   2 2155.08   29.94
  -4   3  -2 1887.96   26.36
  -3   4  -2 2086.66   29.86
  -3   4   2 1879.79   25.37
  -3  -4   2 2110.82   30.21
  -3  -4  -2 1904.27   27.97
  -4  -3   2 1884.12   28.02
   3   4  -3 2238.17   31.02
   3  -4  -3 2287.02   32.19
   4   3  -3 2419.76   34.37
   4  -3  -3 2355.73   33.33
   4  -3   3 2305.00   32.55
   3  -4   3 2289.84   32.64
   4   3   3 2189.55   31.09
   3   4   3 2162.82   30.14
  -3  -4  -3 2232.02   32.70
  -4  -3  -3 2250.33   34.06
  -4   3  -3 2265.73   31.66
  -3   4   3 2155.85   29.03
  -3   4  -3 2244.75   32.21
   3   4  -3 2315.13   33.30
   4   3  -3 2213.29   31.51
  -3  -4   3 2299.12   32.91
  -3  -4  -3 2222.68   31.33
  -4  -3   3 2170.44   31.52
  -4  -3  -3 2483.82   35.56
   3   4  -4  364.50    8.82
   3  -4  -4  332.87    4.33
   4   3  -4  342.37    5.03
   4  -3  -4  391.48    5.45
   4  -3   4  353.82    6.86
   3  -4   4  357.89    8.92
   4   3   4  366.56    9.45
   3   4   4  349.66    6.58
  -3  -4  -4  386.48    7.72
  -4  -3  -4  337.62    5.34
  -4   3  -4  380.72    7.45
  -3   4   4  366.16    2.40
  -3   4  -4  345.87    9.91
   3   4  -4  383.75   12.04
   4   3  -4  345.18    8.90
  -3  -4   4  359.97    5.39
  -3  -4  -4  401.16   19.78
  -4  -3   4  367.74    5.18
  -4  -3  -4  354.92    5.52
   4  -3   5  290.03    6.93
   3  -4   5  299.70    8.76
   4   3   5  276.44    6.57
  -3  -4  -5  287.34    5.35
  -4  -3  -5  276.73    6.54
  -4   3  -5  299.53   10.75
  -3   4  -5  296.12    6.13
   3   4  -5  300.83    7.68
   4   3  -5  284.64    8.36
  -3  -4   5  290.31    5.16
  -3  -4  -5  278.27    5.61
  -4  -3   5  271.05    4.96
   3   4  -6 1339.07   29.63
   3  -4  -6 1285.31   28.55
   4   3  -6 1272.67   29.60
   4  -3  -6 1350.72   29.39
   4  -3   6 1319.09   30.20
   3  -4   6 1324.53   28.75
   4   3   6 1359.12   31.10
   3   4   6 1323.82   28.52
  -3  -4  -6 1275.64   28.10
  -4  -3  -6 1386.52   32.46
   3  -4  -6 1319.11   27.88
   4  -3  -6 1339.27   28.24
  -4   3  -6 1380.95   31.27
  -3   4  -6 1265.39   28.38
   3   4  -6 1323.71   30.09
   4   3  -6 1339.99   31.05
  -3  -4   6 1351.52   29.57
  -3  -4  -6 1300.08   28.55
  -4  -3   6 1320.90   28.89
  -4  -3  -6 1304.73   28.58
   3   4  -7  417.34    9.93
   3  -4  -7  419.84    6.72
   4   3  -7  463.63   21.05
   4  -3  -7  421.18    7.77
   4  -3   7  446.75   14.83
   3  -4   7  419.72    7.94
   4   3   7  423.42   10.06
   3   4   7  426.75    6.89
  -3  -4  -7  422.32    6.52
  -4  -3  -7  429.77    6.14
   3  -4  -7  424.29    4.36
   4  -3  -7  430.93    4.77
  -4   3  -7  417.84    8.31
  -3   4  -7  437.21    7.98
   3   4  -7  402.93   23.57
   4   3  -7  434.94    7.32
  -3  -4   7  426.39    5.15
  -4  -3   7  399.08   20.12
  -3  -4  -7  399.75   19.54
  -4  -3  -7  431.64    6.51
   3   4  -8  123.08    4.11
   3  -4  -8  114.33    5.13
   4   3  -8  124.98    5.47
   4  -3  -8  122.97    6.19
   4  -3   8  113.46    6.65
   3  -4   8  142.49    8.68
   4   3   8  136.76    6.13
   3   4   8  113.02    5.33
  -3  -4  -8  133.11    4.98
  -4  -3  -8  127.52    5.97
   3  -4  -8  115.80    3.70
   4  -3  -8  128.59    4.40
  -4   3  -8  117.68    5.14
  -3   4  -8  119.60    8.16
   3   4  -8  136.47   15.55
   4   3  -8  127.96    5.92
  -3  -4   8  114.69    5.13
  -4  -3   8  124.94    4.40
  -3  -4  -8  141.22    6.39
  -4  -3  -8  114.38    7.16
   3   4  -9  452.14   15.77
   3  -4  -9  368.33   12.43
   4   3  -9  387.20   20.42
   4  -3  -9  363.79   12.66
   4  -3   9  418.24   14.45
   3  -4   9  392.00   16.80
   4   3   9  327.35   11.23
   3   4   9  400.70   12.69
  -3  -4  -9  395.96   12.39
  -4  -3  -9  394.02   14.99
   3  -4  -9  373.87   11.10
  -4   3  -9  382.97   12.92
  -3   4  -9  383.62   13.41
   4   3  -9  409.02   14.35
  -3  -4   9  380.06   12.57
  -4  -3   9  396.73   11.04
  -3  -4  -9  381.11   11.26
  -4  -3  -9  365.79   11.37
   3   4 -10  587.46   16.91
   3  -4 -10  565.62   18.42
   4   3 -10  567.27   13.30
   4  -3 -10  615.26   14.62
   4  -3  10  606.96   15.74
   3  -4  10  593.29   21.30
   4   3  10  595.08   14.72
  -3  -4 -10  607.22   14.83
  -4  -3 -10  566.48   15.76
   3  -4 -10  595.93   10.30
   4  -3 -10  631.43   13.40
  -4   3 -10  606.23   12.31
  -3   4 -10  563.07   11.42
   3   4 -10  653.09   17.15
   4   3 -10  628.87   14.74
  -3  -4  10  577.89   12.30
  -4  -3  10  615.08   10.06
  -3  -4 -10  590.03   12.63
  -4  -3 -10  587.14   13.98
   3   4 -11   86.53   14.57
   3  -4 -11   66.71   15.51
   4   3 -11   59.24   11.93
   4  -3 -11   56.95   12.09
   4  -3  11   58.79   11.56
   3  -4  11   71.78   17.19
   4   3  11   61.81   12.17
   3   4  11  139.16   26.80
  -3  -4 -11   69.01   15.06
  -4  -3 -11   62.67   13.89
   3  -4 -11   64.19    8.88
   4  -3 -11   61.33    8.67
  -4   3 -11   65.29    6.38
  -3   4 -11   64.40    9.04
   3   4 -11   78.70   15.48
   4   3 -11   71.67   13.07
  -3  -4  11   49.85    5.58
  -4  -3  11   48.83    6.53
  -3  -4 -11   56.76    6.14
  -4  -3 -11   49.44    5.38
   3   4 -12   84.46    9.04
   3  -4 -12   84.22   19.05
   4   3 -12   79.67   14.53
   4  -3 -12   82.09   16.13
   4  -3  12   85.37   20.82
   3  -4  12   90.67    9.06
   4   3  12   90.26   19.18
   3   4  12  194.94   18.26
  -3  -4 -12   96.05   11.16
  -4  -3 -12   89.88   16.43
   3  -4 -12   80.72   11.28
   4  -3 -12   75.94   10.63
  -4   3 -12   95.86   18.82
  -3   4 -12   78.02    9.91
   3   4 -12   90.68   17.37
   4   3 -12   74.36   14.95
  -4  -3 -12   76.57    7.49
   3   4 -13  667.09   16.58
   3  -4 -13  634.10   24.63
   4   3 -13  605.61   25.15
   4  -3 -13  688.23   17.68
   4  -3  13  666.51   18.92
   3  -4  13  632.33   27.66
   4   3  13  619.88   29.74
   3   4  13  697.10   20.34
  -3  -4 -13  641.12   25.79
  -4  -3 -13  627.61   26.47
   3  -4 -13  627.06   24.27
   4  -3 -13  623.51   23.90
  -4   3 -13  724.92   14.73
  -3   4 -13  634.98   26.61
   4   3 -13  625.84   28.01
   3   4 -13  653.71   14.13
   3   4 -14  316.00   10.98
   3  -4 -14  325.23   12.10
   4   3 -14  312.35   20.50
   4  -3 -14  324.30   12.81
   4  -3  14  301.94   21.06
   3  -4  14  303.77   12.67
   4   3  14  323.40   14.09
   3   4  14  354.33   29.04
  -3  -4 -14  307.87   11.37
  -4  -3 -14  327.83   12.51
   3  -4 -14  320.82   13.17
   4  -3 -14  319.87   16.80
  -4   3 -14  312.16   10.37
  -3   4 -14  342.55   13.19
   4   3 -14  299.49   20.78
   3   4 -14  314.24   11.44
   3   4 -15  464.32   12.62
   3  -4 -15  577.85   19.51
   4  -3 -15  556.27   18.60
   4  -3  15  449.19   17.10
   3  -4  15  449.03   17.45
   4   3  15  443.17   19.44
   3   4  15  453.63   15.19
  -3  -4 -15  480.46   13.92
  -4  -3 -15  467.74   14.68
   3  -4 -15  454.64   12.49
   4  -3 -15  444.39   12.17
  -4   3 -15  459.27   18.10
  -3   4 -15  441.46   23.96
   4   3 -15  486.96   10.80
   3   4 -15  455.78   12.20
   3   4 -16   14.80    3.94
   3  -4 -16   14.47    3.81
   4   3 -16   18.39    5.49
   4  -3 -16   28.06    6.63
   4  -3  16    7.25    5.23
   3  -4  16   14.14    6.18
   4   3  16   13.00    4.70
  -3  -4 -16   33.04   12.09
  -4  -3 -16   12.32    3.55
   3  -4 -16    4.69    2.59
   4  -3 -16   10.32    4.44
  -4   3 -16   18.98    6.15
  -3   4 -16    5.08    2.42
   4   3 -16   13.99    4.71
   3   4 -16   13.86    3.84
   3   4 -17   36.64    7.22
   3  -4 -17   15.10    7.12
   4   3 -17   17.39    8.02
   4  -3 -17   15.61    6.98
   4  -3  17   28.93    6.89
   3  -4  17   31.57    8.94
   4   3  17   19.27    5.61
   3   4  17   16.28    5.88
  -3  -4 -17   27.36    4.64
  -4  -3 -17   16.13    4.37
   3  -4 -17   23.67    5.31
  -4   3 -17   23.37    5.04
  -3   4 -17   21.99   12.17
   4   3 -17   20.14    5.04
   3   4 -17   13.71    6.07
   3   4 -18   32.84    5.64
   4   3 -18   27.46    5.90
   3  -4 -18   26.60    9.14
   4  -3 -18   23.72    8.99
   4  -3  18   31.08   13.56
   3  -4  18   31.97    9.35
   4   3  18   13.31    5.92
   3   4  18   15.24    6.88
  -3  -4 -18   34.44    6.66
  -4  -3 -18   26.26    4.19
  -4   3 -18   31.31    6.64
  -3   4 -18   25.78    6.69
   4   3 -18   22.22    4.33
   3   4 -18   33.96    6.48
   3   4 -19   49.00   13.44
   3  -4 -19   49.19   12.61
   4   3 -19   64.23   10.46
   4  -3 -19   59.89   10.92
   4  -3  19   70.44   13.13
   3  -4  19   39.00   16.96
   4   3  19   44.75   12.67
   3   4  19   52.13   12.69
  -3  -4 -19   56.64   11.05
  -4  -3 -19   61.38   12.85
  -4   3 -19   54.67    9.82
  -3   4 -19   69.16    9.80
   4   3 -19   33.60    9.75
   3   4 -19   67.09    8.84
   4   3 -20    2.32    4.57
   3  -4 -20    3.09    4.35
   4  -3 -20    6.39    2.69
   4  -3  20   -1.78    4.86
   3  -4  20    1.00    3.12
   4   3  20   -3.02    4.95
   3   4  20    5.10    4.15
  -3  -4  20    0.22    3.62
  -3  -4 -20    0.73    2.08
  -4  -3 -20    6.55    4.36
  -4   3 -20    0.47    2.92
  -3   4 -20    2.11    4.54
   4   3 -20    1.15    2.76
   3   4 -20    0.42    4.84
   4   3 -21   28.37    7.20
   3  -4 -21   11.17    4.88
   4  -3 -21   30.49    7.30
   4  -3  21   12.62    6.01
   3  -4  21   21.82    6.95
   4   3  21   19.27    8.50
   3   4  21   23.40    6.71
  -3  -4  21   12.49    6.61
  -3  -4 -21   12.78    5.22
  -4  -3 -21   23.60    6.56
  -4   3 -21    8.19    4.36
  -3   4 -21   10.21    3.35
   4   3 -21   25.10    6.40
   3   4 -21   19.13    8.64
  -3  -4 -22   16.23    5.94
  -4  -3 -22    7.98    2.84
   4   3 -22   15.15    4.98
   3   4 -22   12.62    6.02
   4  -4   0  101.32    3.57
   4   4   0   96.20    3.73
  -4   4   0  100.19    3.17
  -4  -4   0   90.63    4.44
  -4  -4  -1 8311.12  392.06
   4   4  -2  720.48   12.45
   4  -4  -2  730.66   11.92
   4  -4   2  682.12   13.80
   4   4   2  701.25   11.93
  -4   4  -2  709.08   12.65
  -4  -4   2  676.53   11.16
  -4  -4  -2  673.86   11.40
   4   4  -3  149.63    5.97
   4  -4  -3  137.88    4.34
   4  -4   3  136.36    4.40
   4   4   3  145.37    5.64
  -4  -4  -3  148.20    4.46
  -4   4  -3  142.03    4.72
   4   4  -3  132.95    5.87
  -4  -4   3  138.02    3.95
  -4  -4  -3  131.96    3.70
   4   4  -4  917.06   15.46
   4  -4  -4  911.78   16.63
   4  -4   4  955.26   18.22
   4   4   4  945.18   14.43
  -4  -4  -4  983.00   15.87
  -4   4  -4  955.18   18.20
   4   4  -4  952.13   16.66
  -4  -4   4  918.65   15.32
  -4  -4  -4  933.73   14.48
   4   4  -5  850.69   20.50
   4  -4  -5  813.32   18.61
   4  -4   5  855.88   19.61
   4   4   5  907.99   21.55
  -4  -4  -5  821.09   19.64
  -4   4  -5  863.81   22.88
  -4   4   5  851.37   17.90
   4   4  -5  816.49   18.64
  -4  -4   5  815.46   17.98
  -4  -4  -5  850.46   19.92
   4   4  -6  428.15    7.65
   4  -4   6  446.99   12.11
   4   4   6  446.99   13.13
  -4  -4  -6  457.05   12.53
  -4   4  -6  441.84    7.52
   4   4  -6  578.85   18.26
  -4  -4   6  449.43   11.70
  -4  -4  -6  445.31   11.27
   4   4  -7  658.84   19.46
   4  -4  -7  644.27   17.52
   4  -4   7  692.07   17.27
   4   4   7  642.47   17.66
  -4  -4  -7  668.75   16.16
   4  -4  -7  651.99   14.27
  -4   4  -7  634.54   16.25
   4   4  -7  662.02   16.37
  -4  -4   7  670.28   16.60
  -4  -4  -7  633.32   14.47
   4   4  -8    3.61    1.66
   4  -4  -8    2.71    3.50
   4  -4   8   -0.32    2.93
   4   4   8    5.04    2.52
  -4  -4  -8    3.44    3.65
   4  -4  -8    4.46    1.38
  -4   4  -8   30.17    3.50
   4   4  -8    1.09    4.00
  -4  -4   8    6.72    1.84
  -4  -4  -8    8.06    2.69
   4   4  -9   89.35    7.70
   4  -4  -9   77.82    6.94
   4  -4   9   94.30    7.74
   4   4   9   78.58    9.02
  -4  -4  -9   81.96    7.92
   4  -4  -9   82.17    5.21
  -4   4  -9   80.36    7.79
   4   4  -9  102.36   13.37
  -4  -4   9   83.50    6.14
  -4  -4  -9   84.30    5.37
   4   4 -10   93.44   12.04
   4  -4 -10  103.19   14.22
   4  -4  10  109.30   16.78
   4   4  10   99.19   12.21
  -4  -4 -10   94.40   11.08
   4  -4 -10   94.83    8.57
  -4   4 -10  101.88   10.67
   4   4 -10  104.66   22.66
  -4  -4  10   93.66    8.76
  -4  -4 -10   97.62    9.83
   4   4 -11  604.90   24.60
   4  -4 -11  593.82   27.33
   4  -4  11  593.45   24.33
   4   4  11  617.14   25.80
  -4  -4 -11  585.90   28.59
   4  -4 -11  614.56   23.82
  -4   4 -11  609.73   28.67
   4   4 -11  559.39   28.66
  -4  -4  11  636.69   25.57
  -4  -4 -11  595.14   24.59
   4   4 -12   34.85    9.04
   4  -4 -12   34.79    8.39
   4  -4  12   38.17    8.41
   4   4  12   36.47    7.42
  -4  -4 -12   41.85    8.32
   4  -4 -12   36.21    5.26
  -4   4 -12   39.84    7.69
   4   4 -12   38.62    7.37
  -4  -4 -12   30.92    5.56
   4   4 -13  184.17   12.89
   4  -4 -13  151.10   13.19
   4  -4  13  144.13   15.81
   4   4  13  131.73   15.55
  -4  -4 -13  135.39    8.02
   4  -4 -13  138.76    9.91
  -4   4 -13  155.55   13.01
   4   4 -13  131.66   15.05
   4   4 -14  342.56   23.53
   4  -4 -14  287.91   10.14
   4  -4  14  246.07   23.01
   4   4  14  282.94   13.61
  -4  -4 -14  274.84   11.21
   4  -4 -14  265.69    7.71
  -4   4 -14  240.75   15.49
   4   4 -14  269.59   12.51
   4   4 -15   37.96    4.83
   4  -4 -15   56.01   11.15
   4  -4  15   35.14   10.51
   4   4  15   35.33    9.62
  -4  -4 -15   49.25    9.54
   4  -4 -15   40.24    8.68
  -4   4 -15   42.23    9.24
   4   4 -15   43.30    8.80
   4   4 -16   32.82    5.83
   4  -4 -16   37.52    8.60
   4  -4  16   34.04    9.18
   4   4  16   32.27    7.79
  -4  -4 -16   49.85    8.17
  -4   4 -16   39.90    7.73
   4   4 -16   34.45    6.50
   4   4 -17  174.73   16.89
   4  -4 -17  164.05   23.70
   4  -4  17  153.35   22.18
   4   4  17  158.34   24.40
  -4  -4 -17  175.61   23.42
  -4   4 -17  179.53   22.16
   4   4 -17  158.49   29.49
   4   4 -18   14.44    4.35
   4  -4 -18   13.53    5.45
   4  -4  18   13.22    7.49
   4   4  18   17.41    4.33
  -4  -4 -18   27.23    5.46
  -4   4 -18   16.31    5.81
   4   4 -18    9.10    5.77
   4   4 -19    6.41    3.82
   4  -4 -19    3.50    3.76
   4  -4  19    7.07    3.47
   4   4  19    3.22    2.50
  -4  -4 -19   10.62    4.21
  -4   4 -19    5.97    3.47
   4   4 -19    4.19    3.96
   4   4 -20    3.66    3.40
   4  -4 -20    4.17    2.95
   4  -4  20    2.09    3.55
   4   4  20    5.04    2.12
  -4  -4 -20    3.49    4.35
  -4   4 -20    0.08    2.66
   4   4 -20    1.16    4.63
   4  -4 -21   -1.96    3.82
   4  -4  21    5.71    4.12
   4   4  21   -5.32    4.49
  -4  -4 -21    3.48    3.16
  -4   4 -21    6.44    5.80
   4   4 -21    2.81    2.76
  -4  -4 -22   -2.40    3.41
   4   4 -22    7.22    3.60
   5   0   0    3.92    2.73
  -5   0   0    0.58    0.87
   0  -5   0    2.86    2.21
   0  -5   1   32.93    1.29
   0   5   1   28.68    1.81
   5   0  -1   37.83    8.42
   0  -5   1   34.58    1.62
   5   0   1   37.82    7.77
  -5   0  -1   32.67    3.47
   0   5  -1   32.18    3.40
   0  -5   1   41.10    7.91
   0  -5  -1   33.75    5.42
   0  -5  -2  118.77    3.08
   0  -5   2  124.66    2.44
   5   0  -2  124.67    3.93
   5   0   2  125.13    4.20
  -5   0  -2  131.76    4.26
   0   5  -2  123.77    5.39
   0  -5   2  123.62    3.92
   0  -5  -2  129.90    5.75
   0  -5  -3 1534.33   21.62
   5   0  -3 1433.70   21.38
   5   0   3 1536.03   23.82
   0  -5   3 1457.87   20.25
  -5   0  -3 1463.37   23.42
   0   5  -3 1497.88   24.81
   0  -5   3 1469.53   23.33
   0  -5  -3 1456.27   21.57
   0  -5  -4 1720.32   24.20
   5   0  -4 1709.13   27.06
   5   0   4 1713.68   25.84
   0  -5   4 1685.49   23.58
  -5   0  -4 1704.16   25.89
   0   5  -4 1761.32   25.96
   5   0  -4 1777.33   25.15
   0  -5  -4 1743.47   25.16
   0  -5  -5  249.63    6.07
   5   0  -5  243.75    6.05
   5   0   5  241.10    7.13
   0  -5   5  238.28    4.50
   0  -5  -5  238.85    4.61
  -5   0  -5  232.72    7.30
   0   5  -5  257.63   11.78
   5   0  -5  244.46    6.16
   0  -5   5  227.18    4.94
   0  -5  -5  232.13    4.62
   0  -5  -6  150.91   11.53
   5   0  -6  124.18   10.66
   5   0   6  124.36    8.18
   0  -5   6  126.48    7.44
   0  -5  -6  114.69    7.01
  -5   0  -6  113.64    7.53
   0   5  -6  126.42    9.76
   5   0  -6  117.40    7.20
   0  -5  -6  114.10    8.34
   0  -5  -7   18.77    3.65
   5   0  -7   18.30    4.58
   5   0   7   22.33    4.85
   0  -5  -7   16.78    3.24
  -5   0  -7   24.14    4.70
   0   5  -7   24.14    4.90
   5   0  -7   16.49    2.95
   0  -5  -7   21.61    3.96
   0  -5  -8 1911.96   47.04
   5   0  -8 1854.54   49.51
   5   0   8 2044.51   52.51
   0  -5  -8 1900.25   47.17
  -5   0  -8 1910.78   49.43
   0   5  -8 1938.21   53.22
   5   0  -8 1913.78   46.89
   0  -5  -8 1920.43   47.41
  -5   0   8 1906.75   46.63
   0  -5  -9    9.97    4.04
   5   0  -9   12.01    6.42
   5   0   9   19.54    5.67
   0  -5  -9   15.27    2.96
  -5   0  -9   26.91    4.94
   5   0  -9   15.26    2.79
   0   5  -9   23.98    6.18
  -5   0   9   14.63    2.23
   0  -5 -10  182.21   17.05
   5   0 -10  183.86   18.60
   5   0  10  182.78   16.39
   0  -5  10  155.95   13.87
   0  -5 -10  171.73   14.72
  -5   0 -10  166.01   17.47
   5   0 -10  160.02   13.90
   0   5 -10  170.01   19.02
  -5   0  10  162.21   13.52
   0  -5 -11   12.24    4.76
   5   0 -11   13.44    4.72
   5   0  11   21.58    7.76
   0  -5  11   22.22    7.87
   0  -5 -11   22.90    4.53
  -5   0 -11   25.10    4.46
   5   0 -11   24.99    5.06
   0   5 -11   31.12    6.54
  -5   0  11   11.66    2.56
   0  -5 -12    6.86    4.01
   5   0 -12   -1.17    3.34
   5   0  12    6.76    4.69
   0  -5  12    6.30    3.05
   0  -5 -12    6.35    2.40
  -5   0 -12    5.98    2.75
   5   0 -12    6.64    3.80
   0   5 -12    5.70    2.95
   0  -5 -13    4.03    2.28
   5   0 -13   -0.68    3.86
   5   0  13    1.34    2.56
   0  -5  13    5.16    3.43
   0  -5 -13    1.75    1.51
  -5   0 -13    1.76    2.14
   5   0 -13   -0.25    2.19
   0   5 -13    4.54    3.68
   0  -5 -14   49.21    9.75
   5   0 -14   66.32   11.56
   5   0  14   57.36   15.07
   0  -5  14   53.50   18.78
   0  -5 -14   48.08    6.99
  -5   0 -14   56.05   12.68
   5   0 -14   45.27    7.69
   0   5 -14   50.68   12.75
   0  -5 -15  122.07   16.22
   5   0 -15  127.64   24.58
   5   0  15  126.79   24.04
   0  -5  15  118.45   23.41
   0  -5 -15  140.69   11.25
  -5   0 -15  136.24   11.04
   5   0 -15  125.41    8.95
   0   5 -15  110.24   22.01
   5   0 -16   17.88    5.03
   5   0  16   14.48    3.52
   0  -5  16   13.65    6.93
   0   5  16    3.25    3.15
   0  -5 -16    9.48    2.99
  -5   0 -16    6.51    4.10
   5   0 -16    7.54    3.64
   0   5 -16   20.59    6.65
   5   0 -17   49.43   11.11
   5   0  17   34.95   11.36
   0  -5  17   35.05    6.39
   0   5  17   25.12    6.76
   0  -5 -17   30.19    5.66
  -5   0 -17   38.22    6.94
   5   0 -17   29.67    7.49
   0   5 -17   33.96    8.48
   5   0 -18    7.29    3.28
   5   0  18   18.22    7.22
   0  -5  18    8.41    4.13
   0   5  18    5.45    4.33
   0  -5 -18   11.31    3.55
  -5   0 -18   10.28    4.74
   5   0 -18   14.31    4.19
   0   5 -18    5.23    6.75
   5   0 -19    6.20    1.97
   5   0  19   -2.19    4.96
   0  -5  19   17.58    8.71
   0   5  19    7.66    3.66
   0  -5 -19    6.73    3.36
  -5   0 -19    3.86    3.11
   5   0 -19   20.32   12.10
   0   5 -19    2.84    4.63
   5   0 -20   77.75   18.88
   5   0  20   65.07   19.30
   0  -5  20   61.24   21.85
   0   5  20   61.34   12.98
  -5   0 -20   99.98   14.37
   0   5 -20   59.12   16.38
   5   0 -21   16.79    7.96
   5   0  21   14.32    8.77
   0  -5  21   19.61    4.95
   0   5  21   12.11    3.96
  -5   0 -21   17.58    4.85
   0   5 -21   11.70    3.99
   5  -1   0  151.47    4.47
   5   1   0  177.02    4.69
  -1   5   0  162.11    1.93
  -5   1   0  167.72    3.96
  -1   5   0  164.67    5.82
   1  -5   0  176.73    7.87
  -1  -5   0  163.91    7.40
   1   5   1  187.47    2.28
   5   1  -1  202.76    8.56
   5  -1  -1  173.54    8.05
   5  -1   1  204.19    6.31
   5   1   1  174.19    4.33
   1   5   1  192.42    2.01
  -5  -1  -1  189.86    3.93
  -1   5  -1  192.04    4.61
   1  -5   1  187.68   10.49
   1  -5  -1  205.84    8.11
  -1  -5   1  196.42    5.20
  -1  -5  -1  171.35    8.38
   1  -5  -2  243.74    3.65
   5   1  -2  232.34    5.76
   5  -1  -2  192.60    5.36
   5  -1   2  241.22    4.91
   5   1   2  196.94    4.69
   1  -5   2  200.31    3.34
  -5  -1  -2  233.80    5.58
  -5   1  -2  194.30    8.63
  -1   5  -2  241.24    7.20
   1   5  -2  197.49    6.41
   1  -5  -2  228.03    5.22
  -1  -5   2  238.53    4.20
  -1  -5  -2  197.23    5.44
   1   5  -3  288.81    3.96
   1  -5  -3  291.04    4.67
   5   1  -3  310.56    5.70
   5  -1  -3  297.79    7.73
   5  -1   3  284.55    6.95
   5   1   3  265.82    4.73
   1  -5   3  292.41    3.47
   1   5   3  298.45    4.43
  -5  -1  -3  282.29    5.63
  -5   1  -3  273.28    6.12
  -1   5  -3  298.92   11.98
   1   5  -3  278.15    5.18
   5  -1  -3  292.71    6.11
   1  -5  -3  291.47    6.76
  -1  -5   3  301.41    8.08
  -1  -5  -3  285.36    5.12
   1   5  -4 1188.06   17.33
   1  -5  -4 1123.45   17.71
   5   1  -4 1121.21   17.31
   5  -1  -4 1203.95   18.98
   5  -1   4 1116.75   19.22
   5   1   4 1218.96   18.52
   1  -5   4 1213.93   17.89
   1  -5  -4 1131.27   17.12
  -1  -5  -4 1232.09   19.68
  -5  -1  -4 1081.47   16.91
  -5   1  -4 1236.30   19.36
  -1   5  -4 1123.79   19.16
   1   5  -4 1314.50   21.89
   5  -1  -4 1249.19   17.85
   5   1  -4 1148.14   17.82
   1  -5  -4 1102.47   16.79
  -1  -5   4 1118.59   18.52
  -1  -5  -4 1228.23   19.57
  -1  -5  -5 1733.72   25.04
   1   5  -5 1619.19   23.57
   1  -5  -5 1669.22   25.53
   5   1  -5 1590.37   23.34
   5  -1  -5 1668.63   24.86
   5  -1   5 1661.50   27.81
   5   1   5 1665.79   25.02
   1  -5   5 1687.52   24.28
   1  -5  -5 1710.71   25.69
  -1  -5  -5 1691.41   25.00
  -5  -1  -5 1696.76   26.46
  -5   1  -5 1631.22   24.82
  -1   5  -5 1716.23   28.12
   5  -1  -5 1698.49   23.96
   1   5  -5 1674.39   25.56
   5   1  -5 1651.08   24.07
  -1  -5   5 1701.32   25.34
  -1  -5  -5 1691.21   24.75
  -1  -5  -6  608.96   14.91
   1   5  -6  596.91   15.08
   1  -5  -6  607.23   13.93
   5   1  -6  595.04   14.02
   5  -1  -6  617.54   17.02
   5  -1   6  616.63   14.83
   5   1   6  583.69   14.81
   1  -5   6  593.55   14.37
  -1  -5  -6  583.42   13.61
   1  -5  -6  589.32   13.98
  -5  -1  -6  595.60   16.77
  -5   1  -6  639.74   15.12
  -1   5  -6  594.85   14.29
   5  -1  -6  647.41   14.62
   1   5  -6  594.33   14.61
   5   1  -6  600.58   15.84
  -1  -5   6  610.87   14.96
  -1  -5  -6  601.44   15.26
  -5  -1   6  593.24   13.61
  -1  -5  -7  627.98   16.33
   1   5  -7  605.90   14.85
   1  -5  -7  599.00   15.01
   5   1  -7  707.73   19.80
   5  -1  -7  632.45   15.65
   5  -1   7  635.91   17.01
   5   1   7  614.58   15.08
   1  -5   7  624.12   15.12
  -1  -5  -7  622.43   14.81
   1  -5  -7  610.86   13.93
  -5  -1  -7  605.88   14.82
  -5   1  -7  619.98   17.39
  -1   5  -7  624.98   15.52
   5  -1  -7  650.95   15.92
   1   5  -7  620.39   15.66
   5   1  -7  593.46   15.38
  -1  -5  -7  622.73   15.45
  -5  -1   7  636.28   14.71
  -1  -5  -8  595.86   16.53
   1   5  -8  580.55   15.97
   1  -5  -8  623.34   17.55
   5   1  -8  616.30   18.78
   5  -1  -8  560.97   17.45
   5  -1   8  604.69   22.39
   5   1   8  632.21   18.98
   1  -5   8  557.01   15.30
  -1  -5  -8  593.68   15.79
   1  -5  -8  649.39   16.95
  -5  -1  -8  649.81   21.14
  -5   1  -8  566.87   18.12
   5  -1  -8  581.72   15.41
  -1   5  -8  635.57   22.08
   1   5  -8  562.98   16.66
   5   1  -8  640.38   18.94
  -1  -5   8  615.24   17.65
  -1  -5  -8  559.64   17.02
  -5  -1   8  577.81   14.94
  -1  -5  -9   68.79    7.86
   1   5  -9   71.84    5.46
   1  -5  -9   74.57    9.61
   5   1  -9   67.93    7.30
   5  -1  -9   72.67    6.59
   5  -1   9   79.52    7.88
   5   1   9   84.71   18.58
   1  -5   9   70.94    6.73
  -1  -5  -9   72.18    9.40
   1  -5  -9   67.92    6.65
  -5  -1  -9   56.21   14.03
  -5   1  -9   74.29   14.56
   5  -1  -9   70.98   11.03
  -1   5  -9   91.68   11.47
   1   5  -9   88.76   12.94
   5   1  -9   76.93   12.11
  -1  -5  -9   63.87    4.45
  -5  -1   9   59.42    5.87
  -1  -5 -10  355.23   13.46
   1   5 -10  348.36    9.52
   1  -5 -10  443.33   13.58
   5   1 -10  359.72    9.89
   5  -1 -10  369.25   12.25
   5  -1  10  362.43    9.67
   5   1  10  376.01   10.77
   1  -5  10  360.43   10.18
  -1  -5 -10  356.96   13.15
   1  -5 -10  369.03    8.67
  -5  -1 -10  373.08   11.34
  -5   1 -10  353.52    9.73
   5  -1 -10  369.66    8.20
  -1   5 -10  372.68   11.87
   1   5 -10  358.17   12.38
   5   1 -10  364.97   11.74
  -1  -5 -10  357.43    9.54
  -5  -1  10  358.36    7.00
  -5   1  10  367.52    5.85
  -5  -1 -10  356.71    7.65
  -1  -5 -11  158.09   17.57
   1   5 -11  160.22   10.74
   1  -5 -11  167.44    9.61
   5   1 -11  176.99   18.62
   5  -1 -11  142.00   13.54
   5  -1  11  171.08   10.28
   5   1  11  138.62   11.57
   1  -5  11  147.85   16.06
  -1  -5 -11  150.63   14.50
   1  -5 -11  164.03    9.70
  -5  -1 -11  172.27   17.91
  -5   1 -11  143.15   16.08
   5  -1 -11  141.18   12.80
  -1   5 -11  175.94   15.92
   5   1 -11  169.43    9.16
   1   5 -11  154.08   10.32
  -1  -5 -11  142.00   13.28
  -5  -1  11  139.94   10.12
  -5  -1 -11  167.96   10.63
   1   5 -12  305.66   10.02
   1  -5 -12  278.94   13.97
   5   1 -12  270.34   15.34
   5  -1 -12  325.64   10.93
   5  -1  12  267.44   18.48
   5   1  12  294.97   10.07
   1  -5  12  305.12   10.26
  -1  -5 -12  312.74   10.19
   1  -5 -12  279.05    7.87
  -5  -1 -12  282.75    9.57
  -5   1 -12  318.97   11.27
   5  -1 -12  311.94    9.27
  -1   5 -12  261.89   19.51
   5   1 -12  272.84   11.82
   1   5 -12  296.57   12.01
  -5  -1 -12  281.73    7.85
   1   5 -13   19.48    5.14
   1  -5 -13   15.33    5.36
   5   1 -13   15.18    3.58
   5  -1 -13   17.01    6.40
   5  -1  13   16.41    3.80
   5   1  13   20.83    4.70
   1  -5  13   33.70    6.06
   1   5  13   10.92    5.52
  -1  -5 -13   15.67    4.15
   1  -5 -13    8.48    2.95
  -5  -1 -13    7.81    3.06
  -5   1 -13   22.07    5.30
   5  -1 -13   15.10    5.19
  -1   5 -13   10.42    5.10
   5   1 -13   13.29    2.87
   1   5 -13   14.40    5.46
   1  -5 -14  104.20   21.24
   5   1 -14   91.54   18.73
   5  -1 -14  103.99   20.89
   5  -1  14  116.58    7.48
   5   1  14   93.79   12.82
   1  -5  14   86.74    9.84
   1   5  14  120.56   21.61
  -1  -5 -14   98.18    9.16
   1  -5 -14  108.82   16.30
  -5  -1 -14  112.42   10.00
  -5   1 -14   92.84   20.26
   5  -1 -14   86.81   15.97
  -1   5 -14  122.66   13.24
   5   1 -14  103.37   14.31
   1   5 -14   99.13   16.65
   1  -5 -15    7.74    5.23
   5   1 -15   12.38    3.26
   5  -1 -15   35.59    6.14
   5  -1  15   14.58    4.00
   5   1  15   19.35    5.51
   1  -5  15   20.60    5.54
   1   5  15   11.32    4.44
  -1  -5  15   21.41    5.23
  -1  -5 -15   20.59    4.20
   1  -5 -15   21.10    5.23
  -5  -1 -15    9.81    3.80
  -5   1 -15   24.10    7.45
   5  -1 -15   18.52    4.12
  -1   5 -15   14.35    5.98
   5   1 -15   14.38    3.27
   1   5 -15   10.00    2.56
   1  -5 -16  188.30   24.31
   5   1 -16  183.64   18.43
   5  -1 -16  159.98   23.61
   5  -1  16  195.78   22.95
   5   1  16  168.15   26.95
   1  -5  16  376.46   30.83
   1   5  16  173.79   25.13
  -1  -5  16  192.93   25.69
  -1  -5 -16  189.81   17.46
   1  -5 -16  183.63   17.00
  -5  -1 -16  198.88   21.86
  -5   1 -16  160.47   15.76
   5  -1 -16  173.85   15.60
  -1   5 -16  176.28   23.68
   5   1 -16  187.04   23.98
   1   5 -16  153.42   32.00
   1  -5 -17   32.44    7.35
   5   1 -17  197.48   39.51
   5  -1 -17   28.81    6.09
   5  -1  17   34.11    7.67
   5   1  17    8.48    7.61
   1  -5  17   37.88    9.15
   1   5  17   31.71   11.12
  -1  -5  17   20.51    9.14
  -1  -5 -17   37.12    6.25
   1  -5 -17   26.94    6.89
  -5  -1 -17   40.18    7.40
  -5   1 -17   33.44    8.24
   5  -1 -17   24.59    6.27
  -1   5 -17   27.95    8.20
   5   1 -17   41.50    6.95
   1   5 -17   26.06    8.94
   5   1 -18   30.86    6.89
   5  -1 -18   51.70   10.85
   5  -1  18   27.74    3.76
   5   1  18   27.32    7.04
   1  -5  18   40.14   11.47
   1   5  18   29.85    8.49
  -1  -5  18   26.93   10.06
  -1  -5 -18   56.10    7.72
   1  -5 -18   34.54    5.69
  -5  -1 -18   35.35    7.20
  -5   1 -18   46.40   11.04
   5  -1 -18   31.15    8.56
  -1   5 -18   33.81    9.78
   5   1 -18   23.11    7.66
   1   5 -18   32.76    9.92
   5   1 -19    4.03    4.29
   5  -1 -19    5.48    2.45
   5  -1  19    4.07    4.79
   5   1  19    9.95    5.10
   1  -5  19    8.52    6.49
   1   5  19    2.39    2.23
  -1  -5  19    4.97    2.86
  -1   5  19    5.58    4.60
  -1  -5 -19    1.67    2.14
  -5  -1 -19    4.36    3.31
  -5   1 -19    3.31    3.93
  -1   5 -19    4.04    3.29
   5   1 -19    5.64    1.93
   1   5 -19    2.84    3.25
   5   1 -20   58.66   11.37
   5  -1 -20   45.26    9.43
   5  -1  20   43.21   11.75
   5   1  20   52.45   13.84
   1  -5  20   37.38   14.20
   1   5  20   57.61   11.70
  -1  -5  20   36.12   14.82
  -1   5  20   40.63   11.70
  -1  -5 -20   44.45    8.11
  -5  -1 -20   56.69   10.58
  -5   1 -20   59.16   18.98
   5   1 -20   39.93   11.18
  -1   5 -20   32.97   15.21
   1   5 -20   41.15   15.55
   5   1 -21    7.37    4.41
   5  -1 -21    2.90    2.82
   5  -1  21   14.13    5.64
   5   1  21    3.77    4.35
   1  -5  21    0.95    3.27
   1   5  21    3.58    4.88
  -1  -5  21    4.40    3.59
  -1   5  21    4.70    1.89
  -1  -5 -21   10.66    4.80
  -5  -1 -21   10.25    3.92
  -5   1 -21    7.23    3.12
  -1   5 -21    3.36    3.44
   1   5 -21    2.17    4.38
  -1  -5  22   11.82    6.22
   2   5   0  402.15   19.11
   2  -5   0  397.26    4.54
   5  -2   0  383.05    5.40
   5   2   0  409.22   21.01
  -2  -5   0  422.02   20.02
  -5   2   0  402.64   19.36
  -2   5   0  455.42    9.37
  -2  -5   0  414.29   20.65
   2  -5  -1  390.36    5.03
   5   2  -1  389.26    4.88
   5  -2  -1  481.42   12.91
   5  -2   1  388.53    6.65
   5   2   1  459.98    9.43
  -2  -5   1  394.86    3.42
   2   5   1  387.96    4.51
  -2  -5  -1  433.59    6.43
  -5  -2  -1  397.72    5.78
  -5   2   1  385.96    3.24
  -5   2  -1  449.35    7.49
  -2   5  -1  377.98    5.87
  -2   5   1  467.12    9.08
  -2  -5   1  388.19    5.96
  -2  -5  -1  445.26    9.30
   2   5  -2 3319.78   44.93
   2  -5  -2 3278.54   44.77
   5   2  -2 3239.00   44.96
   5  -2  -2 3149.55   44.45
   5  -2   2 3236.70   45.08
   5   2   2 3398.91   47.14
   2   5   2 3311.45   44.95
   5  -2  -2 3318.88   44.79
  -5   2  -2 3238.15   44.35
  -2   5  -2 3335.68   46.52
   2   5  -2 3283.72   46.10
  -2  -5   2 3217.80   44.69
  -2  -5  -2 3280.15   45.63
  -5  -2   2 3285.32   45.49
   2   5  -3  265.50    4.86
   2  -5  -3  235.47    3.54
   5   2  -3  236.99    9.51
   5  -2  -3  246.85    5.38
   5  -2   3  246.18    7.16
   5   2   3  257.95    5.99
   2  -5   3  239.63    3.49
   2   5   3  245.60    4.15
   5  -2  -3  233.88    2.25
  -5  -2  -3  227.15    4.19
  -5   2  -3  246.70    6.11
  -2   5  -3  246.35    5.08
   2   5  -3  255.17    5.14
  -2  -5   3  264.32    8.62
  -2  -5  -3  255.16    5.51
  -5  -2   3  233.46    5.39
   2   5  -4  136.31    5.75
   2  -5  -4  138.69    3.33
   5   2  -4  146.15    6.30
   5  -2  -4  135.46   11.27
   5  -2   4  139.96    4.52
   5   2   4  147.00    5.46
   2  -5   4  143.49    5.58
   2   5   4  141.92    3.44
  -2  -5  -4  132.46    3.96
  -5  -2  -4  148.82    4.00
  -5   2  -4  143.76    4.17
  -2   5  -4  151.19    4.64
   2   5  -4  137.35    5.55
   5   2  -4  143.05   11.35
  -2  -5   4  137.97    4.18
  -2  -5  -4  135.60    3.88
  -5  -2   4  129.01    5.28
   2   5  -5 1770.16   37.94
   2  -5  -5 1541.17   23.96
   5   2  -5 1535.02   25.42
   5  -2  -5 1495.28   32.33
   5  -2   5 1584.51   27.22
   5   2   5 1512.24   24.31
   2  -5   5 1510.84   32.25
   2   5   5 1610.54   24.04
  -2  -5  -5 1496.54   32.77
  -5  -2  -5 1722.52   25.96
  -5   2  -5 1543.60   35.08
  -2   5  -5 1623.56   27.71
   5  -2  -5 1497.54   21.08
   2   5  -5 1557.14   26.59
   5   2  -5 1577.49   23.48
  -2  -5   5 1574.47   23.28
  -2  -5  -5 1546.29   33.46
  -5  -2   5 1482.93   23.59
   2   5  -6  559.56   13.93
   2  -5  -6  502.93   11.79
   5   2  -6  508.76   14.05
   5  -2  -6  532.18   12.97
   5  -2   6  538.31   17.99
   5   2   6  550.30   14.05
   2  -5   6  564.39   13.37
   2   5   6  509.19   16.23
  -2  -5  -6  531.38   12.64
   2  -5  -6  512.80   11.57
  -5  -2  -6  519.07   13.77
  -5   2  -6  550.64   16.30
   5  -2  -6  549.14   12.13
  -2   5  -6  515.93   13.77
   2   5  -6  538.46   13.52
   5   2  -6  520.16   15.13
  -2  -5   6  510.65   12.65
  -2  -5  -6  579.86   14.78
  -5  -2   6  549.55   12.85
  -5  -2  -6  499.23   11.93
   2   5  -7  243.97   12.77
   2  -5  -7  222.54   11.87
   5   2  -7  221.05   11.90
   5  -2  -7  250.14   14.18
   5  -2   7  227.95   18.36
   5   2   7  235.97   12.71
   2  -5   7  238.21   12.94
   2   5   7  215.96   11.73
  -2  -5  -7  233.28   12.33
   2  -5  -7  219.08   11.56
  -5  -2  -7  214.90   11.65
  -5   2  -7  220.24   11.67
   5  -2  -7  239.25   11.96
  -2   5  -7  234.16   12.78
   2   5  -7  232.19   13.87
   5   2  -7  205.87   11.25
  -2  -5   7  236.44   12.78
  -2  -5  -7  220.83   11.25
  -5  -2   7  220.24   11.31
  -5  -2  -7  206.83   11.34
   2   5  -8  121.12    4.56
   2  -5  -8  148.45    7.68
   5   2  -8  131.78   10.46
   5  -2  -8  117.29   16.96
   5  -2   8  141.72   11.39
   5   2   8  125.47    6.40
   2  -5   8  124.73    5.70
   2   5   8  147.84   11.19
  -2  -5  -8  111.90    4.28
   2  -5  -8  155.23    6.99
  -5  -2  -8  150.72   15.82
  -5   2  -8  109.44    9.71
   5  -2  -8  124.94    4.93
  -2   5  -8  159.89   12.73
   2   5  -8  133.12   24.33
   5   2  -8  154.59   14.71
  -2  -5   8  141.03    4.61
  -2  -5  -8  121.75    5.13
  -5  -2   8  126.30    5.67
  -5  -2  -8  151.03    4.60
   2   5  -9   73.41   11.00
   2  -5  -9   73.85   15.66
   5   2  -9   64.15    5.42
   5  -2  -9   44.64   12.02
   5  -2   9   67.91   14.08
   5   2   9   55.88   10.95
   2  -5   9   56.94   11.21
   2   5   9   59.41   13.20
  -2  -5  -9   48.32   10.95
   2  -5  -9   64.18    5.68
  -5  -2  -9   58.79   12.86
  -5   2  -9   46.46   13.97
   5  -2  -9   46.35    8.50
  -2   5  -9   61.93    6.71
   2   5  -9   62.89   12.26
   5   2  -9   77.06   10.49
  -2  -5   9   64.48    3.61
  -2  -5  -9   48.93    2.97
  -5  -2   9   43.95    5.59
  -5  -2  -9   63.37    6.28
   2   5 -10  792.21   17.27
   2  -5 -10  822.34   14.94
   5   2 -10  870.41   18.54
   5  -2 -10  854.16   18.77
   5  -2  10  817.85   17.32
   5   2  10  877.34   18.28
   2  -5  10  834.13   15.46
   2   5  10  816.60   18.88
  -2  -5 -10  821.29   15.25
   2  -5 -10  845.22   14.11
  -5  -2 -10  851.99   19.80
  -5   2 -10  821.38   20.05
   5  -2 -10  859.63   14.33
  -2   5 -10  816.13   19.94
   2   5 -10  862.73   18.35
   5   2 -10  842.53   26.49
  -2  -5 -10  831.52   12.76
  -5  -2  10  849.85   13.79
  -5  -2 -10  942.33   15.22
   2   5 -11  251.12   12.83
   2  -5 -11  299.95   16.07
   5   2 -11  302.09   13.55
   5  -2 -11  237.78   11.92
   5  -2  11  307.72   14.25
   5   2  11  256.08   13.15
   2  -5  11  244.59   16.14
   2   5  11  297.21   14.43
  -2  -5 -11  242.40   11.76
   2  -5 -11  306.75   12.84
  -5  -2 -11  308.48   14.18
  -5   2 -11  264.62   17.77
   5  -2 -11  243.36   14.15
  -2   5 -11  287.73   19.43
   5   2 -11  294.00   17.14
   2   5 -11  244.51   18.00
  -2  -5 -11  244.23   10.83
  -5  -2  11  251.06   10.86
  -5  -2 -11  292.25   12.13
   2   5 -12   60.52   11.75
   2  -5 -12   66.67   13.84
   5   2 -12   67.80   12.69
   5  -2 -12   50.27   12.30
   5  -2  12   72.68    8.13
   5   2  12   52.16   10.58
   2  -5  12   63.46   12.86
   2   5  12   66.56   14.26
  -2  -5 -12   60.52   11.22
   2  -5 -12   74.78   10.52
  -5  -2 -12   73.10   14.50
  -5   2 -12   55.33   13.26
   5  -2 -12   53.35    9.49
  -2   5 -12   79.17   16.25
   2   5 -12   61.85   16.61
   5   2 -12   73.45   14.36
  -5  -2 -12   60.47    7.36
   2   5 -13   45.44    5.54
   2  -5 -13   36.58    6.46
   5   2 -13   39.20    7.41
   5  -2 -13   32.71    9.01
   5  -2  13   50.94   11.63
   5   2  13   46.34   11.45
   2  -5  13   43.94   10.55
   2   5  13   21.31    4.87
  -2  -5 -13   44.47    7.13
   2  -5 -13   25.35    5.33
  -5  -2 -13   36.66    9.14
  -5   2 -13   47.94   10.12
   5  -2 -13   38.57    7.23
  -2   5 -13   30.78    9.14
   5   2 -13   29.14    5.34
   2   5 -13   42.40    7.67
   2   5 -14  422.47   13.61
   2  -5 -14  396.53   14.35
   5   2 -14  454.42   16.09
   5  -2 -14  438.25   19.02
   5  -2  14  452.18   15.95
   5   2  14  390.34   26.52
   2  -5  14  423.40   14.98
   2   5  14  437.06   18.32
  -2  -5 -14  412.49   12.82
   2  -5 -14  437.58   12.05
  -5  -2 -14  430.42   12.55
  -5   2 -14  411.72   13.67
   5  -2 -14  420.98   14.13
  -2   5 -14  440.46   13.41
   5   2 -14  432.00   12.00
   2   5 -14  434.33   15.97
   2   5 -15   41.53    7.65
   2  -5 -15   37.02    8.11
   5   2 -15   32.90    7.03
   5  -2 -15   29.13    6.67
   5  -2  15   25.62    7.17
   5   2  15   38.24    9.70
   2  -5  15   41.34    6.68
   2   5  15   26.46    5.42
  -2  -5 -15   38.07    6.12
   2  -5 -15   33.78    4.90
  -5  -2 -15   31.82    6.57
  -5   2 -15   38.57    8.72
   5  -2 -15   62.81   15.70
  -2   5 -15   20.98    5.54
   5   2 -15   16.48    4.78
   2   5 -15   43.83    8.87
   2   5 -16   32.49   10.42
   2  -5 -16   28.76    7.55
   5   2 -16   38.31    7.35
   5  -2 -16   36.87    6.99
   5  -2  16   28.18    5.33
   5   2  16   29.20    6.97
   2  -5  16   37.07    8.71
   2   5  16   30.19    6.89
  -2  -5 -16   31.92    6.95
   2  -5 -16   29.31    3.90
  -5  -2 -16   33.37    7.62
  -5   2 -16   31.94    7.22
   5  -2 -16   30.08    6.14
  -2   5 -16   29.55    9.94
   5   2 -16   24.14    7.01
   2   5 -16   37.35   10.52
   2  -5 -17   36.86    8.50
   5   2 -17   50.40    9.34
   5  -2 -17   50.94   10.06
   5  -2  17   39.14    8.71
   5   2  17   43.01   12.41
   2  -5  17   44.92   11.27
   2   5  17   37.96   10.64
  -2  -5 -17   54.80    9.14
   2  -5 -17   40.31    6.66
  -5  -2 -17   50.07    6.70
  -5   2 -17   39.02   10.69
  -2   5 -17   29.21    8.36
   5   2 -17   27.41   11.12
   2   5 -17   41.67    8.48
   2  -5 -18   94.67   18.46
   5   2 -18  104.99   17.78
   5  -2 -18  117.10   19.23
   5  -2  18  100.42   21.06
   5   2  18   95.51    9.69
   2  -5  18  123.21   13.61
   2   5  18  112.41   18.22
  -2  -5  18   90.58   22.02
  -2  -5 -18  127.93   18.63
  -5  -2 -18  110.49   18.12
  -5   2 -18  107.36   22.89
  -2   5 -18   96.06   20.13
   5   2 -18  115.40    7.58
   2   5 -18   97.68   22.97
   2  -5 -19    2.72    2.80
   5   2 -19   13.85    3.57
   5  -2 -19   11.11    3.87
   5  -2  19    3.91    3.26
   5   2  19    2.42    2.61
   2  -5  19    6.48    4.62
   2   5  19   15.35    4.55
  -2  -5  19    6.11    4.72
  -2  -5 -19   12.32    3.82
  -5  -2 -19    4.60    4.77
  -5   2 -19    9.30    3.65
  -2   5 -19   11.68    4.58
   5   2 -19    5.52    2.40
   2   5 -19   12.72    5.70
   5   2 -20    2.60    2.81
   5  -2 -20    7.44    4.45
   5  -2  20    3.22    4.31
   5   2  20    7.29    6.62
   2  -5  20    6.76    3.21
   2   5  20    7.65    7.51
  -2  -5  20    4.37    3.94
  -2   5  20    7.15    3.05
  -2  -5 -20    9.56    3.78
  -5  -2 -20   -2.01    3.66
  -5   2 -20    6.67    2.83
  -2   5 -20   -1.01    4.49
   5   2 -20    7.58    4.25
   2   5 -20    5.11    4.73
   5   2 -21   22.37    6.89
   5  -2 -21   11.49    5.40
   5  -2  21    7.51    5.03
   5   2  21    9.80    5.52
   2  -5  21    8.41    4.47
   2   5  21   22.94    7.82
  -2  -5  21   15.63    7.98
  -2   5  21    8.57    5.10
  -2  -5 -21   12.62    4.28
  -5  -2 -21   13.65    5.08
  -5   2 -21    9.20    4.71
  -2   5 -21   16.61    6.41
   5   2 -21   11.54    5.72
   2   5 -21    5.88    5.13
  -2  -5 -22   27.65   12.85
   3  -5   0  256.23    4.11
   3   5   0  248.70    3.34
   5  -3   0  240.54    4.77
   5   3   0  254.65    5.65
  -5   3   0  265.39    2.98
  -3   5   0  262.64    4.19
  -3  -5   0  241.39    4.54
  -5  -3   0  245.53    4.55
   3   5  -1  346.65    3.16
   3  -5  -1  375.27    4.59
   5   3  -1  375.25    5.66
   5  -3  -1  337.29    5.48
   3  -5   1  358.60    4.80
   5  -3   1  371.76    5.62
   5   3   1  328.94    5.15
   3   5   1  389.80    5.51
  -5   3   1  401.66   19.16
  -5   3  -1  340.66    4.26
   5  -3  -1  338.00    3.07
  -3   5  -1  386.01    5.70
  -3   5   1  330.62    4.40
  -3  -5   1  387.76    6.61
  -3  -5  -1  349.23    6.64
  -5  -3   1  346.47    7.60
  -5  -3  -1  361.11    5.38
   3   5  -2  664.13   10.42
   3  -5  -2  637.72   10.53
   5   3  -2  646.16   10.95
   5  -3  -2  643.03   10.88
   5  -3   2  642.06   11.84
   3  -5   2  632.00   11.20
   5   3   2  649.60   11.58
   3   5   2  630.89    9.74
  -5  -3  -2  625.90   11.09
  -5   3  -2  662.05   10.79
   5  -3  -2  664.59    9.20
  -3   5  -2  627.24   11.95
  -3   5   2  646.98    9.71
  -3  -5   2  618.53   11.72
  -3  -5  -2  674.14   11.22
  -5  -3   2  740.52   13.45
  -5  -3  -2  609.97   10.45
   3   5  -3 1059.57   16.37
   3  -5  -3 1119.14   17.05
   5   3  -3 1103.83   17.48
   5  -3  -3 1040.32   16.30
   5  -3   3 1143.91   18.69
   3  -5   3 1055.22   16.61
   5   3   3 1070.26   18.04
   3   5   3 1203.66   18.24
  -3  -5  -3 1049.35   16.05
  -3   5   3 1023.24   14.26
  -5   3  -3 1051.31   16.39
  -3   5  -3 1199.44   19.46
   3   5  -3 1040.25   19.95
  -3  -5   3 1129.65   19.67
  -3  -5  -3 1028.30   15.71
  -5  -3   3 1039.98   16.50
  -5  -3  -3 1105.57   17.64
   3   5  -4  158.41    4.19
   3  -5  -4  133.14    5.23
   5   3  -4  144.66    3.94
   5  -3  -4  171.67    5.02
   5   3   4  169.94    4.15
   3  -5   4  180.23    4.08
   3   5   4  134.31    5.54
  -3  -5  -4  159.04    6.26
  -5  -3  -4  143.55    4.11
  -5   3  -4  163.59    5.78
   5  -3  -4  163.43    1.53
  -3   5  -4  144.36    4.70
   3   5  -4  171.14    6.04
   5   3  -4  149.79    5.48
  -3  -5   4  126.31    6.63
  -3  -5  -4  159.86    4.56
  -5  -3   4  178.23    4.06
  -5  -3  -4  141.35    4.46
   3   5  -5  603.38   14.40
[truncated: 6,244,703 more chars]
